# Supplementary material
Source: publisher figshare collection journal article supplement (https://gsajournals.figshare.com/articles/dataset/_/9389255)
Supplement: Supplementary file 1 [file 2]

## **SUPPORTING INFORMATION**

Natural variation and genetic determinants of *Caenorhabditis elegans* sperm size by Gimond *et al.*

### **CONTENTS**

#### **Supporting Files**

File S1. Raw data in Excel format. Numbers below refer to different worksheets in Excel file

#### **Supporting Figures**

Figure S1 Differences in male mating ability and fertility between strains with variable male sperm size

Figure S2 Allometric relationships between sperm and body size

Figure S3 Effect of *nurf-1* RNAi on male sperm size of *C. elegans*

Figure S4 Hermaphrodite sperm size of *isw-1(n3297)* compared to N2 wild-type and *nurf-1(n4295)*

Figure S5 Effect of *nurf-1* RNAi on male sperm size of the gonochoristic species, *C. plicata*

#### **Supporting Tables**

Table S1. List of *Caenorhabditis* strains used in this study.

Table S2. Male sperm size variation in 97 *C. elegans* strains.

Table S3. Mean sperm size and plugging phenotype of examined *C. elegans* strains.

Table S4. Strain variation in hermaphrodite sperm size

Table S5. Strain variation in hermaphrodite sperm production

Table S6. Strain and sex differences in male and hermaphrodite body size

## Supporting Files

### **File S1. Raw data in Excel format. Numbers below refer to different worksheets in Excel file**

1. Male sperm size of 97 *C. elegans* strains (measurements in microns) (Figure 1)
2. Strain variation in male mating ability and fertility (Figures 3A and 3C)
3. Strain variation in ejaculate size (sperm number) (Figure 3E)
4. Strain variation in male fertilization success when competing with hermaphrodite self-sperm (Figure 4A)
5. Strain variation in male-male competitive ability (Figures 4C and 4E)
6. Strain variation in hermaphrodite sperm size (Figure 5A)
7. Strain variation in hermaphrodite sperm production (Figure 5C)
8. Strain variation in body size (Figure 6)
9. Male and hermaphrodite sperm size of strains N2, LSJ1, LSJ2 and CC1 (Figure 7)
10. Male and hermaphrodite sperm size of strains CX12311, CX13248, N2, and *nurf-1(n4295)* (Figure 8A-D)
11. Male sperm size measurements resulting from quantitative complementation tests using strains N2, LSJ1 and *nurf-1(n4295)* (Figure 8E)
12. Male sperm size of NURF complex mutants (Figure 9B)
13. Hermaphrodite sperm size of *isw-1(n3297)* versus N2 (Figure S2)
14. Male primary spermatocyte size of *isw-1(n3297)* versus N2 (Figure 9E)
15. Variation in body size of N2, LSJ1, *nurf-1(n4295)* and *isw-1(n3294)* (Figure 10)
16. Effect of *nurf-1* RNAi on male sperm size of *C. elegans* (Figure S1)
17. Effect of *nurf-1* RNAi on male sperm size of *C. plicata* (Figure S3)

## Supporting Figures

FigureS1

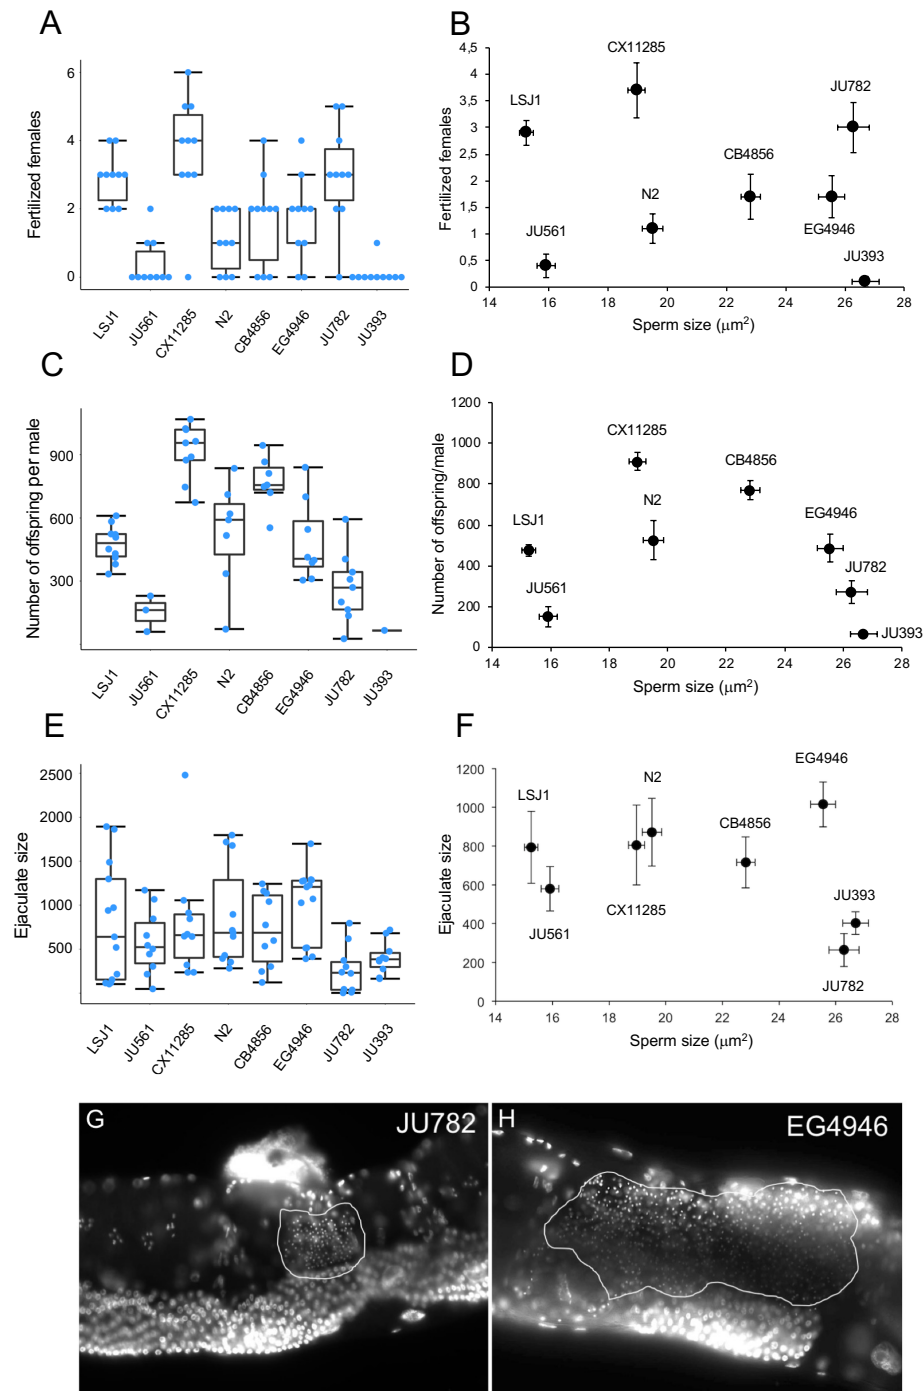

**Figure S1. Differences in male mating ability and fertility between strains with variable male sperm size**

Male mating ability, fertility, and ejaculate size in eight *C. elegans* strains with different average male sperm size. Strains with smallest (LSJ1) to largest (JU393) male sperm are arranged from left to right. (A) Significant strain variation in the number of *fog-2*

females fertilized by a single male during an eight-hour window (Kruskal-Wallis,  $\chi^2=45.12$ ,  $df=7$ ,  $P<0.0001$ ) and (B) absence of correlation with average male sperm size ( $\rho_{\text{Spearman}}=-0.23$ ,  $P=0.59$ ). (C) Significant strain variation in the number of offspring sired by a single male during eight hours of mating with up to 10 females (Kruskal-Wallis,  $\chi^2=37.78$ ,  $df=7$ ,  $P<0.0001$ ) and (D) absence of correlation with average male sperm size ( $\rho_{\text{Spearman}}=-0.29$ ,  $P=0.49$ ). (E) Significant strain variation in ejaculate size, as measured by the number of sperm deposited by one male in a single mating (ANOVA,  $F_{7, 86}=3.77$ ,  $P=0.0014$ ) and (F) no correlation between average ejaculate size and male sperm size ( $\rho_{\text{Spearman}}=-0.33$ ,  $P=0.42$ , log-transformed data). (G, H) Images of DAPI-stained *fog-2* females after single male mating event of strains (G) JU782 and (H) EG4946; The white lines delineate the mass of inseminated sperm. Samples sizes were between 10 and 13 animals per strain per experiment. (Note: Figures S1C and S1D are also included in main Figure 2 of the manuscript as Figures 2A and 2B)

**Figure S2**

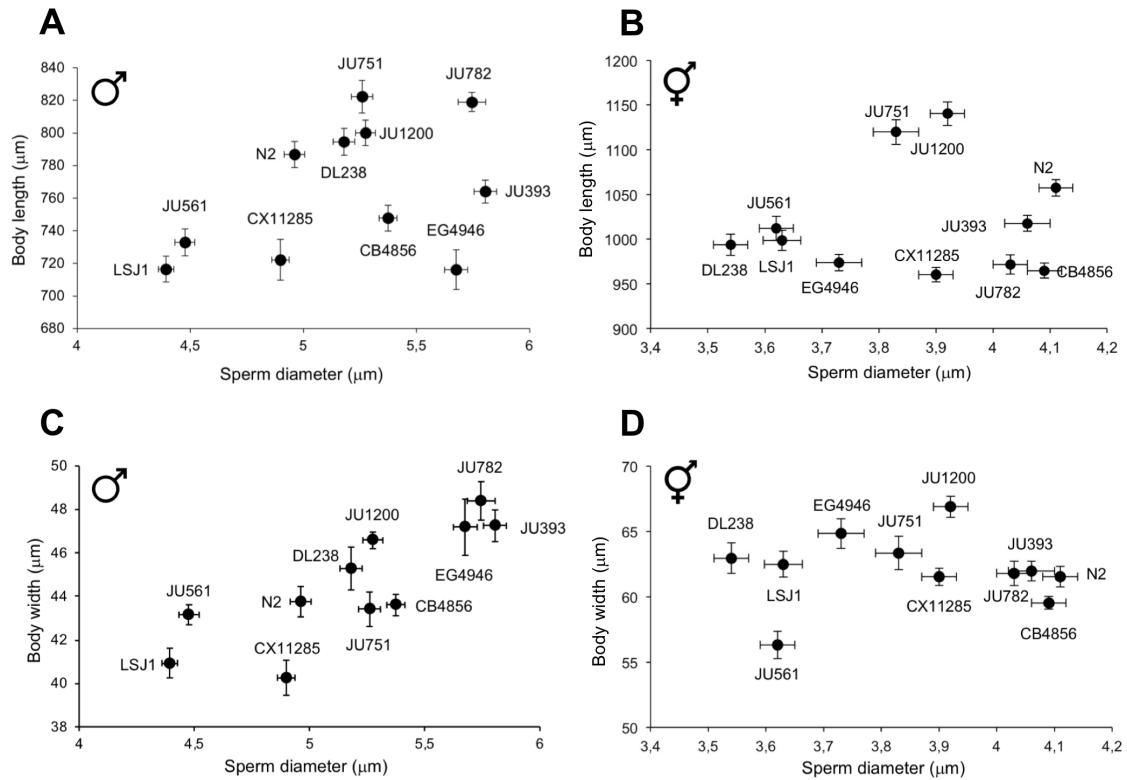

**Figure S2. Allometric relationships between sperm and body size**

Absence of scaling relationships between sperm size (mean diameter) and body length in (A) males ( $F_{1,10}=1.88$ ,  $R^2=0.17$ ,  $P=0.20$ ) and (B) hermaphrodites ( $F_{1,10}=0.005$ ,  $R^2=0.0005$ ,  $P=0.94$ ). Significant positive association between body width and sperm size in (C) males ( $F_{1,10}=16.61$ ,  $R^2=0.65$ ,  $P=0.0028$ ) but not (D) hermaphrodites ( $F_{1,10}=0.43$ ,  $R^2=0.05$ ,  $P=0.53$ ). Sperm size measures based on least-squares regression of strain mean (LSM); all data log-transformed for statistical analyses. Body length and width was measured in 10-29 individuals per strain and per sex (Table S6).

**Figure S3**

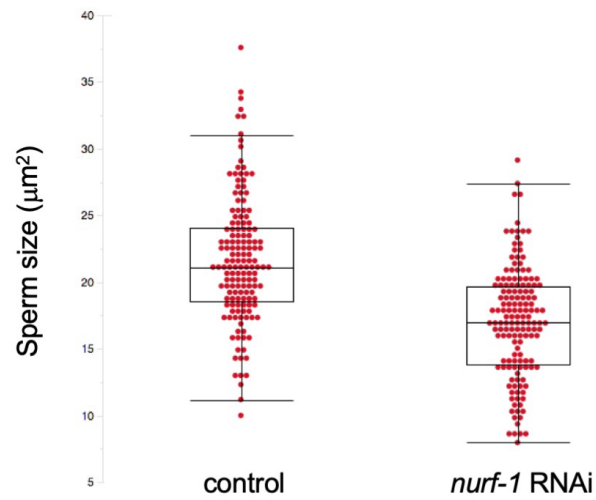

**Figure S3. Effect of *nurf-1* RNAi on male sperm size of *C. elegans*.** *nurf-1* RNAi significantly reduces male sperm size of the reference strain N2 (ANOVA, effect *treatment*:  $F_{1,280}=90.91$ ,  $P<0.0001$ ; effect *individual(treatment)*:  $F_{18,280}=3.07$ ,  $P<0.0001$ ). Fifteen spermatids from each of 10 individuals were measured per treatment (N=150).

**Figure S4**

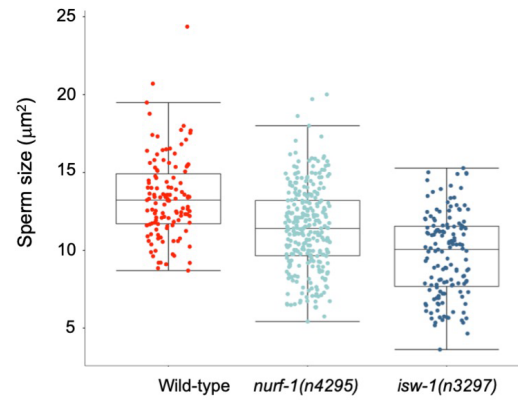

**Figure S4. Hermaphrodite sperm size of *isw-1(n3297)* compared to N2 wild-type and *nurf-1(n4295)*.** Hermaphrodite sperm size of *isw-1(n3297)* is significantly reduced compared to the N2 wild-type (ANOVA, effect *strain*:  $F_{1, 280} = 90.91$ ,  $P < 0.0001$ ; effect *individual(strain)*:  $F_{18, 280} = 3.07$ ,  $P < 0.0001$ ).

**Figure S5**

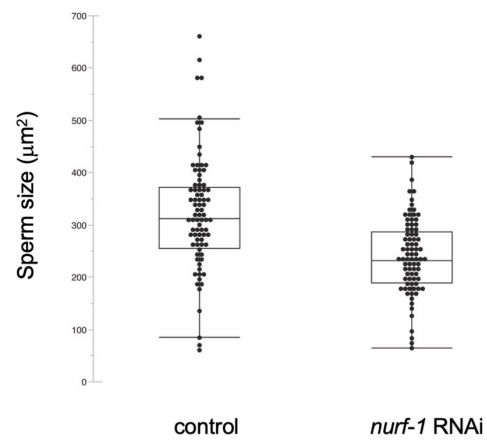

**Figure S5. Effect of *nurf-1* RNAi on male sperm size of the gonochoristic species, *C. plicata*.** *nurf-1* (*C. elegans*) RNAi significantly reduces male sperm size of the strain SB355 (ANOVA, effect *treatment*:  $F_{1,163}=27.56$ ,  $P<0.0001$ ; effect *individual(treatment)*:  $F_{10,163}=8.10$ ,  $P<0.0001$ ). 8-15 spermatids from each of 7 individuals were measured per treatment.



## Supporting Tables

**Table S1.** List of *Caenorhabditis* strains used in this study. For additional strain information, see CeNDR: <https://www.elegansvariation.org>

| STRAIN  | ORIGIN                     | DATE OF ISOLATION |
|---------|----------------------------|-------------------|
| AB1     | Adelaide, Australia        | 1983              |
| AB4     | Adelaide, Australia        | 1983              |
| CB4851  | Bergerac, France           | pre-1949          |
| CB4852  | Unknown                    | pre-1966          |
| CB4853  | Altadena, USA              | 1974/05           |
| CB4854  | Altadena, USA              | 1974/05           |
| CB4856  | Oahu, Hawaii               | 1972/08           |
| CB4857  | Claremont, USA             | 1972/11           |
| CB4858  | Pasadena, USA              | 1973              |
| CB4932  | Taunton, United Kingdom    | pre-1991          |
| CX11262 | Los Angeles, USA           | 2003/09           |
| CX11264 | Los Angeles, USA           | 2003/09           |
| CX11271 | Pasadena, USA              | 2003/09           |
| CX11276 | Los Angeles, USA           | 2003/09           |
| CX11285 | Los Angeles, USA           | 2003/09           |
| CX11292 | Los Angeles, USA           | 2004/02           |
| CX11307 | Los Angeles, USA           | 2003/09           |
| CX11314 | Los Angeles, USA           | 2003/09           |
| CX11315 | Los Angeles, USA           | 2003/09           |
| DL200   | Addis Ababa, Ethiopia      | 2007/12           |
| DL226   | Corvallis, USA             | 2007              |
| DL238   | Manuka, Hawaii             | 2008/07/15        |
| ED3005  | Edinburgh, United Kingdom  | 2004/10/25        |
| ED3011  | Edinburgh, United Kingdom  | 2004/11/26        |
| ED3012  | Edinburgh, United Kingdom  | 2004/11/26        |
| ED3017  | Edinburgh, United Kingdom  | 2004/12/03        |
| ED3040  | Johannesburg, South Africa | 2006/03           |
| ED3046  | Ceres, South Africa        | 2006/03           |
| ED3048  | Ceres, South Africa        | 2006/03           |
| ED3049  | Ceres, South Africa        | 2006/03           |
| ED3052  | Ceres, South Africa        | 2006/03           |
| ED3073  | Limuru, Kenya              | 2006/03           |
| ED3077  | Nairobi, Kenya             | 2006/03           |
| EG4347  | Eugene, USA                | 2006/10           |
| EG4349  | Salt Lake City, USA        | 2006/10           |
| EG4724  | Amares, Portugal           | 2007/03           |
| EG4725  | Amares, Portugal           | 2007/03           |
| EG4946  | Salt Lake City, USA        | 2007/09/27        |
| JT11398 | Lake Forest Park, USA      | 2003/12           |
| JU1088  | Kakegawa, Japan            | 2007/03/14        |
| JU1172  | Concepcion, Chile          | 2007/04           |
| JU1200  | Dundonald, United Kingdom  | 2007/08/01        |
| JU1212  | Primel Trégastel, France   | 2007/09/24        |
| JU1213  | Primel Trégastel, France   | 2007/09/24        |
| JU1242  | Santeuil, France           | 2007/10/14        |
| JU1246  | Santeuil, France           | 2007/10/14        |
| JU1395  | Saut-aux-Loups, France     | 2008/03/01        |
| JU1400  | Sevilla, Spain             | 2008/03           |
| JU1409  | Carmona, Spain             | 2008/03/31        |
| JU1440  | Barcelona, Spain           | 2008/06/09        |
| JU1491  | Le Blanc, France           | 2008/08/17        |
| JU1530  | Orsay, France              | 2008/09/09        |
| JU1568  | Ivry-sur-Seine, France     | 2008/10/05        |
| JU1580  | Orsay, France              | 2008/10/06        |
| JU1581  | Orsay, France              | 2008/10/23        |
| JU1586  | Le Blanc, France           | 2008/11/03        |
| JU1652  | Montevideo, Uruguay        | 2009              |
| JU1896  | Athens, Greece             | 2010/01/02        |
| JU258   | Ribeiro Frio, Madeira      | 2001/10           |

|        |                              |            |
|--------|------------------------------|------------|
| JU310  | Le Blanc, France             | 2002/08/25 |
| JU311  | Merlet, France               | 2002/09/08 |
| JU323  | Merlet, France               | 2002/09/08 |
| JU346  | Merlet, France               | 2002/09/08 |
| JU360  | Franconville, France         | 2002/09/02 |
| JU363  | Franconville, France         | 2002/09/16 |
| JU367  | Franconville, France         | 2002/09/16 |
| JU393  | Hermanville, France          | 2002/09    |
| JU394  | Hermanville, France          | 2002/09    |
| JU397  | Hermanville, France          | 2002/09    |
| JU406  | Hermanville, France          | 2002/12/30 |
| JU440  | Beauchêne, France            | 2003/09/12 |
| JU561  | Sainte-Barbe, France         | 2004/10/03 |
| JU642  | Le Perreux-sur-Marne, France | 2004/12/14 |
| JU751  | Le Perreux-sur-Marne, France | 2005/06/08 |
| JU774  | Carcavelos, Portugal         | 2005/07/10 |
| JU775  | Lisbon, Portugal             | 2005/07/10 |
| JU778  | Lisbon, Portugal             | 2005/07/10 |
| JU782  | Lisbon, Portugal             | 2005/07/10 |
| JU792  | Fréchendets, France          | 2005/08/31 |
| JU830  | Tübingen, Germany            | 2005/09/28 |
| JU847  | Obernai, France              | 2005/10/03 |
| KR314  | Vancouver, Canada            | 1984/05    |
| LKC34  | Unknown city, Madagascar     | 2005/06/17 |
| LSJ1   | Bristol, United Kingdom      | 1951       |
| N2     | Bristol, United Kingdom      | 1951       |
| MY1    | Lingen, Germany              | 2002/07    |
| MY10   | Roxel, Germany               | 2002/07    |
| MY16   | Mecklenbeck, Germany         | 2002/07    |
| MY18   | Roxel, Germany               | 2002/07    |
| MY23   | Roxel, Germany               | 2002/07    |
| PB303  | NA                           | 1998/11/14 |
| PB306  | NA                           | 1998/11/28 |
| PS2025 | Altadena, USA                | Unknown    |
| PX179  | Eugene, USA                  | 2001/10/02 |
| QX1211 | San Francisco, USA           | 2007/11/26 |
| QX1233 | Berkeley, USA                | 2007/11/24 |
| RC301  | Freiburg, Germany            | 1983       |
| WN2002 | Wageningen, Netherlands      | 2007/11/20 |

**Table S2.** Male sperm size variation (means of cross-sectional area, microns) and CV in 97 *C. elegans* strains.

| Strain  | Sperm Size (mean) | SEM  | CV (within-individual) | CV (between-individual) | N individuals | N sperm |
|---------|-------------------|------|------------------------|-------------------------|---------------|---------|
| AB1     | 23.94             | 1.68 | 16.49                  | 5.22                    | 7             | 140     |
| AB4     | 22.13             | 0.83 | 18.75                  | 6.46                    | 7             | 140     |
| CB4852  | 21.44             | 1.91 | 17.55                  | 5.68                    | 7             | 140     |
| CB4853  | 21.98             | 2.36 | 22.13                  | 4.66                    | 7             | 140     |
| CB4854  | 25.07             | 1.73 | 21.09                  | 4.05                    | 7             | 140     |
| CB4856  | 22.83             | 0.70 | 16.42                  | 5.60                    | 7             | 140     |
| CB4857  | 22.89             | 2.05 | 20.67                  | 4.35                    | 7             | 140     |
| CB4858  | 22.08             | 1.53 | 17.63                  | 7.01                    | 7             | 140     |
| CB4932  | 21.06             | 0.88 | 15.65                  | 7.69                    | 7             | 140     |
| CX11262 | 21.81             | 1.65 | 16.93                  | 8.79                    | 7             | 140     |
| CX11264 | 20.85             | 1.29 | 16.33                  | 4.91                    | 7             | 140     |
| CX11271 | 25.03             | 1.55 | 18.86                  | 7.04                    | 7             | 140     |
| CX11276 | 21.56             | 1.24 | 18.82                  | 6.23                    | 7             | 140     |
| CX11285 | 18.97             | 1.60 | 17.16                  | 6.81                    | 7             | 140     |
| CX11292 | 21.40             | 1.51 | 19.59                  | 7.48                    | 7             | 140     |
| CX11307 | 23.95             | 1.82 | 17.03                  | 5.90                    | 7             | 140     |
| CX11314 | 20.76             | 1.83 | 18.55                  | 6.06                    | 7             | 140     |
| CX11315 | 20.82             | 1.36 | 15.20                  | 7.69                    | 7             | 140     |
| DL200   | 20.62             | 0.62 | 16.97                  | 3.31                    | 7             | 140     |
| DL226   | 24.36             | 2.09 | 18.99                  | 5.82                    | 7             | 140     |
| DL238   | 21.29             | 1.52 | 19.70                  | 8.92                    | 7             | 140     |
| ED3005  | 24.36             | 1.47 | 24.36                  | 5.44                    | 7             | 140     |
| ED3011  | 21.17             | 1.39 | 25.29                  | 13.02                   | 7             | 140     |
| ED3012  | 22.72             | 1.05 | 16.88                  | 6.27                    | 7             | 140     |
| ED3017  | 23.23             | 1.70 | 20.66                  | 4.92                    | 7             | 140     |
| ED3040  | 22.45             | 1.14 | 20.66                  | 9.96                    | 7             | 140     |
| ED3046  | 24.32             | 1.22 | 18.63                  | 4.75                    | 7             | 140     |
| ED3048  | 20.73             | 2.29 | 19.68                  | 6.12                    | 7             | 140     |
| ED3049  | 21.68             | 0.72 | 13.74                  | 4.87                    | 7             | 140     |
| ED3052  | 21.97             | 1.91 | 16.82                  | 7.09                    | 7             | 140     |
| ED3073  | 22.98             | 1.45 | 16.42                  | 5.25                    | 7             | 140     |
| ED3077  | 22.63             | 0.79 | 20.15                  | 6.86                    | 7             | 140     |
| EG4347  | 24.05             | 1.28 | 19.25                  | 7.10                    | 7             | 140     |
| EG4349  | 21.49             | 2.00 | 18.71                  | 5.43                    | 7             | 140     |
| EG4724  | 20.96             | 2.24 | 14.97                  | 6.88                    | 7             | 140     |
| EG4725  | 21.08             | 1.24 | 18.07                  | 8.55                    | 7             | 140     |
| EG4946  | 25.55             | 1.68 | 19.75                  | 6.28                    | 7             | 140     |
| JT11398 | 22.17             | 1.80 | 15.50                  | 5.90                    | 7             | 140     |
| JU258   | 20.79             | 1.46 | 15.15                  | 5.98                    | 7             | 140     |
| JU310   | 24.36             | 1.23 | 19.54                  | 5.79                    | 7             | 140     |
| JU311   | 24.06             | 2.07 | 20.87                  | 13.30                   | 7             | 140     |
| JU323   | 23.80             | 2.55 | 22.45                  | 6.77                    | 7             | 140     |
| JU346   | 23.35             | 1.66 | 14.92                  | 5.96                    | 7             | 140     |
| JU360   | 23.91             | 1.34 | 17.15                  | 7.36                    | 7             | 140     |
| JU363   | 24.90             | 1.38 | 19.22                  | 5.31                    | 7             | 140     |
| JU367   | 23.37             | 0.94 | 14.16                  | 5.77                    | 7             | 140     |
| JU393   | 26.70             | 0.92 | 18.15                  | 10.12                   | 7             | 140     |
| JU394   | 24.16             | 1.39 | 16.32                  | 4.12                    | 7             | 140     |
| JU397   | 23.12             | 0.95 | 12.10                  | 6.74                    | 6             | 120     |
| JU406   | 21.36             | 1.96 | 17.72                  | 7.32                    | 7             | 140     |
| JU440   | 23.22             | 1.01 | 17.77                  | 6.27                    | 7             | 140     |
| JU561   | 15.92             | 2.06 | 19.17                  | 12.52                   | 7             | 140     |
| JU642   | 21.21             | 1.55 | 13.97                  | 11.23                   | 7             | 140     |
| JU751   | 21.94             | 2.41 | 18.75                  | 9.02                    | 7             | 140     |
| JU774   | 22.10             | 1.68 | 21.79                  | 10.10                   | 7             | 140     |
| JU775   | 22.48             | 1.89 | 21.71                  | 10.49                   | 7             | 140     |
| JU778   | 20.37             | 1.46 | 22.84                  | 8.98                    | 7             | 140     |
| JU782   | 26.29             | 2.68 | 23.26                  | 3.23                    | 7             | 140     |
| JU792   | 20.59             | 1.40 | 14.52                  | 7.78                    | 7             | 140     |
| JU830   | 24.16             | 1.06 | 15.54                  | 3.07                    | 7             | 140     |
| JU847   | 22.06             | 1.73 | 17.73                  | 5.16                    | 7             | 140     |
| JU1088  | 23.41             | 1.19 | 14.26                  | 8.82                    | 7             | 140     |
| JU1172  | 22.57             | 2.48 | 20.17                  | 5.61                    | 7             | 140     |

|        |       |      |       |       |   |     |
|--------|-------|------|-------|-------|---|-----|
| JU1200 | 22.00 | 1.37 | 18.35 | 3.85  | 7 | 140 |
| JU1212 | 21.61 | 1.51 | 18.11 | 3.14  | 7 | 140 |
| JU1213 | 23.80 | 1.44 | 24.69 | 21.07 | 7 | 140 |
| JU1242 | 19.99 | 1.00 | 15.13 | 12.12 | 7 | 140 |
| JU1246 | 21.40 | 2.59 | 19.01 | 7.33  | 7 | 140 |
| JU1395 | 22.77 | 1.04 | 17.56 | 2.38  | 7 | 140 |
| JU1400 | 19.56 | 1.91 | 18.74 | 5.19  | 7 | 140 |
| JU1409 | 24.64 | 0.91 | 13.12 | 5.23  | 7 | 140 |
| JU1440 | 20.49 | 2.44 | 19.04 | 4.92  | 7 | 140 |
| JU1491 | 21.70 | 1.71 | 21.68 | 3.81  | 7 | 140 |
| JU1530 | 25.71 | 1.63 | 17.35 | 20.12 | 7 | 140 |
| JU1568 | 22.09 | 1.91 | 16.93 | 6.42  | 7 | 140 |
| JU1580 | 22.00 | 0.76 | 15.02 | 7.87  | 7 | 140 |
| JU1581 | 20.41 | 1.22 | 13.76 | 3.65  | 7 | 140 |
| JU1586 | 20.16 | 1.47 | 19.50 | 9.14  | 7 | 140 |
| JU1652 | 21.95 | 1.59 | 17.23 | 6.97  | 7 | 140 |
| JU1896 | 23.21 | 0.81 | 18.26 | 8.87  | 7 | 140 |
| KR314  | 22.11 | 3.11 | 21.29 | 14.20 | 6 | 120 |
| LKC34  | 24.68 | 1.06 | 18.99 | 5.75  | 7 | 140 |
| LSJ1   | 15.25 | 0.82 | 16.09 | 9.08  | 7 | 140 |
| MY1    | 20.01 | 1.56 | 16.72 | 4.62  | 7 | 140 |
| MY10   | 20.84 | 1.54 | 20.29 | 9.43  | 7 | 140 |
| MY16   | 22.46 | 1.79 | 16.80 | 1.66  | 7 | 140 |
| MY18   | 22.16 | 1.12 | 20.60 | 10.50 | 7 | 140 |
| MY23   | 20.09 | 1.65 | 16.80 | 7.44  | 7 | 140 |
| N2     | 19.51 | 2.17 | 20.68 | 3.70  | 7 | 140 |
| PB303  | 23.01 | 0.83 | 18.10 | 4.90  | 7 | 140 |
| PB306  | 22.15 | 1.47 | 18.60 | 5.82  | 7 | 140 |
| PS2025 | 22.40 | 1.48 | 19.73 | 7.99  | 7 | 140 |
| PX179  | 22.41 | 1.81 | 21.73 | 7.20  | 7 | 140 |
| QX1211 | 22.11 | 1.02 | 18.49 | 6.97  | 7 | 140 |
| QX1233 | 23.57 | 2.81 | 23.73 | 19.28 | 7 | 140 |
| RC301  | 21.86 | 0.95 | 16.92 | 6.65  | 7 | 140 |
| WN2002 | 22.37 | 2.06 | 20.86 | 7.31  | 7 | 140 |

**Table S3.** Mean sperm size and plugging phenotype of examined *C. elegans* strains. Plugging phenotype data from Andersen et al. (2012) and Palopoli et al. (2015).

| Strain  | Mean sperm size | Plugging =1, Non-plugging=0 |
|---------|-----------------|-----------------------------|
| AB1     | 23.5511         | 0                           |
| AB4     | 21.659          | 1                           |
| CB4852  | 21.0393         | 0                           |
| CB4853  | 21.356          | 1                           |
| CB4854  | 24.4207         | 1                           |
| CB4856  | 22.4802         | 1                           |
| CB4857  | 22.3462         | 0                           |
| CB4858  | 21.6617         | 1                           |
| CB4932  | 20.7466         | 0                           |
| CX11262 | 21.3944         | 1                           |
| CX11264 | 20.537          | 1                           |
| CX11271 | 24.5216         | 1                           |
| CX11276 | 21.1239         | 1                           |
| CX11285 | 18.6448         | 1                           |
| CX11292 | 20.9053         | 1                           |
| CX11307 | 23.5335         | 1                           |
| CX11314 | 20.3464         | 1                           |
| CX11315 | 20.5113         | 1                           |
| DL200   | 20.3174         | 1                           |
| DL226   | 23.8156         | 1                           |
| DL238   | 20.7834         | 1                           |
| ED3005  | 23.5608         | 1                           |
| ED3011  | 20.2955         | 1                           |
| ED3012  | 22.3289         | 0                           |
| ED3017  | 22.6823         | 1                           |
| ED3040  | 21.8398         | 1                           |
| ED3046  | 23.8324         | 1                           |
| ED3048  | 20.2543         | 1                           |
| ED3049  | 21.45           | 1                           |
| ED3052  | 21.5752         | 1                           |
| ED3073  | 22.6221         | 1                           |
| ED3077  | 22.0667         | 1                           |
| EG4347  | 23.5467         | 0                           |
| EG4349  | 21.0612         | 1                           |
| EG4724  | 20.6426         | 1                           |
| EG4725  | 20.631          | 1                           |
| EG4946  | 24.9506         | 0                           |
| JT11398 | 21.8455         | 0                           |
| JU1088  | 23.0792         | 1                           |
| JU1172  | 22.0359         | 1                           |
| JU1200  | 21.58           | 0                           |
| JU1212  | 21.2382         | 0                           |
| JU1213  | 22.6857         | 1                           |
| JU1242  | 19.6241         | 1                           |
| JU1246  | 20.9496         | 1                           |
| JU1395  | 22.3787         | 0                           |
| JU1400  | 19.1491         | 1                           |
| JU1409  | 24.3819         | 1                           |
| JU1440  | 20.0642         | 1                           |
| JU1491  | 21.1306         | 1                           |
| JU1530  | 24.8259         | 1                           |
| JU1568  | 21.6964         | 0                           |
| JU1580  | 21.6949         | 1                           |
| JU1581  | 20.1968         | 1                           |
| JU1586  | 19.6909         | 0                           |
| JU1652  | 21.5463         | 1                           |
| JU1896  | 22.7062         | 0                           |
| JU258   | 20.4938         | 1                           |
| JU310   | 23.8629         | 0                           |
| JU311   | 23.3055         | 0                           |
| JU323   | 23.1108         | 1                           |
| JU346   | 23.0378         | 1                           |
| JU360   | 23.4768         | 1                           |
| JU363   | 24.3861         | 1                           |

|        |         |   |
|--------|---------|---|
| JU367  | 23.1158 | 0 |
| JU393  | 26.1593 | 1 |
| JU394  | 23.8254 | 0 |
| JU397  | 22.9068 | 1 |
| JU406  | 20.9359 | 0 |
| JU440  | 22.8045 | 0 |
| JU561  | 15.4953 | 1 |
| JU642  | 20.8737 | 1 |
| JU751  | 21.4432 | 1 |
| JU774  | 21.4306 | 1 |
| JU775  | 21.8151 | 1 |
| JU778  | 19.7247 | 1 |
| JU782  | 25.4637 | 1 |
| JU792  | 20.3049 | 1 |
| JU830  | 23.8397 | 1 |
| JU847  | 21.6807 | 1 |
| KR314  | 21.366  | 1 |
| LKC34  | 24.1826 | 1 |
| LSJ1   | 15.0017 | 0 |
| MY1    | 19.7027 | 1 |
| MY10   | 20.3428 | 1 |
| MY16   | 22.107  | 1 |
| MY18   | 21.557  | 1 |
| MY23   | 19.733  | 1 |
| N2     | 19.0539 | 0 |
| PB303  | 22.6011 | 1 |
| PB306  | 21.7096 | 1 |
| PS2025 | 21.8714 | 1 |
| PX179  | 21.788  | 0 |
| QX1211 | 21.6496 | 1 |
| QX1233 | 22.4217 | 1 |
| RC301  | 21.4845 | 1 |
| WN2002 | 21.7914 | 0 |

**Table S4.** Strain variation in hermaphrodite sperm size (and comparison to male sperm size) (cross-sectional area in microns) (data shown in figure 5A).

| Strain  | Sex           | Mean sperm size | SEM  | N individuals | N spermatids |
|---------|---------------|-----------------|------|---------------|--------------|
| LSJ1    | Male          | 15.25           | 0.23 | 7             | 140          |
| LSJ1    | Hermaphrodite | 10.44           | 0.20 | 11            | 143          |
| JU561   | Male          | 15.91           | 0.31 | 7             | 140          |
| JU561   | Hermaphrodite | 10.34           | 0.17 | 12            | 134          |
| CX11285 | Male          | 18.97           | 0.29 | 7             | 140          |
| CX11285 | Hermaphrodite | 12.04           | 0.22 | 9             | 104          |
| N2      | Male          | 19.51           | 0.35 | 7             | 140          |
| N2      | Hermaphrodite | 13.37           | 0.23 | 9             | 123          |
| DL238   | Male          | 21.29           | 0.39 | 7             | 140          |
| DL238   | Hermaphrodite | 9.96            | 0.19 | 8             | 140          |
| JU751   | Male          | 21.94           | 0.38 | 7             | 140          |
| JU751   | Hermaphrodite | 11.65           | 0.25 | 10            | 99           |
| JU1200  | Male          | 21.99           | 0.34 | 7             | 140          |
| JU1200  | Hermaphrodite | 12.16           | 0.20 | 12            | 136          |
| JU775   | Male          | 22.48           | 0.46 | 7             | 140          |
| JU775   | Hermaphrodite | 9.04            | 0.24 | 7             | 87           |
| CB4856  | Male          | 22.8            | 0.33 | 7             | 140          |
| CB4856  | Hermaphrodite | 13.25           | 0.21 | 13            | 149          |
| EG4946  | Male          | 25.55           | 0.44 | 7             | 140          |
| EG4946  | Hermaphrodite | 11.07           | 0.25 | 8             | 125          |
| JU782   | Male          | 26.29           | 0.53 | 7             | 140          |
| JU782   | Hermaphrodite | 12.94           | 0.24 | 10            | 136          |
| JU393   | Male          | 26.70           | 0.45 | 7             | 140          |
| JU393   | Hermaphrodite | 13.19           | 0.32 | 7             | 152          |

**Table S5.** Strain variation in hermaphrodite sperm production (data in Figure 5C).

| <b>Strain</b> | <b>Mean sperm<br/>number/spermatheca</b> | <b>SEM</b> | <b>N individuals</b> |
|---------------|------------------------------------------|------------|----------------------|
| CB4856        | 137.00                                   | 3.28       | 31                   |
| CX11285       | 146.65                                   | 3.98       | 20                   |
| EG4946        | 151.83                                   | 7.22       | 23                   |
| JU393         | 150.15                                   | 5.48       | 20                   |
| JU561         | 136.38                                   | 5.20       | 29                   |
| JU782         | 152.74                                   | 4.00       | 27                   |
| LSJ1          | 175.96                                   | 7.81       | 23                   |
| N2            | 145.00                                   | 5.28       | 12                   |



**Table S6.** Strain and sex differences in male and hermaphrodite body size (measures in microns). Strain and sex had significant effects on body length (ANOVA, effect sex:  $F_{1,422}=2325.80$ ,  $P<0.0001$ ; effect *strain*:  $F_{10,422}=12.78$ ,  $P<0.0001$ ; interaction sex x *strain*:  $F_{10,422}=23.57$ ,  $P<0.0001$ ) and body width (ANOVA, effect sex:  $F_{1,422}=1549.46$ ,  $P<0.0001$ ; effect *strain*:  $F_{10,422}=15.25$ ,  $P<0.0001$ ; interaction sex x *strain*:  $F_{10,422}=19.47$ ,  $P<0.0001$ ). (ANOVA analyses testing for the fixed effects of *strain* and sex on body length/width; all data log-transformed).

| Strain  | Sex | Body length | SE length | Body width | SE width | N individuals |
|---------|-----|-------------|-----------|------------|----------|---------------|
| LSJ1    | M   | 716.5       | 7.9       | 40.9       | 0.6      | 24            |
| LSJ1    | H   | 998         | 11.2      | 62         | 0.9      | 23            |
| JU561   | M   | 732.9       | 8.1       | 43.1       | 0.4      | 19            |
| JU561   | H   | 1012        | 13.3      | 56         | 1.0      | 18            |
| CX11285 | M   | 722.2       | 12.5      | 40.2       | 0.8      | 19            |
| CX11285 | H   | 960         | 8.0       | 62         | 0.6      | 18            |
| N2      | M   | 786.8       | 8.1       | 43.7       | 0.6      | 23            |
| N2      | H   | 1057        | 9.2       | 62         | 0.7      | 20            |
| DL238   | M   | 794.7       | 8.2       | 45.2       | 0.9      | 21            |
| DL238   | H   | 994         | 12.0      | 63         | 1.1      | 17            |
| JU751   | M   | 822.3       | 10.0      | 43.4       | 0.7      | 15            |
| JU751   | H   | 1120        | 13.8      | 63         | 1.2      | 17            |
| JU1200  | M   | 800.1       | 7.8       | 46.6       | 0.3      | 21            |
| JU1200  | H   | 1140        | 13.2      | 67         | 0.8      | 21            |
| CB4856  | M   | 747.8       | 7.9       | 43.6       | 0.4      | 21            |
| CB4856  | H   | 965         | 8.3       | 60         | 0.4      | 19            |
| EG4946  | M   | 716.1       | 12.1      | 47.2       | 1.2      | 10            |
| EG4946  | H   | 974         | 9.1       | 65         | 1.1      | 16            |
| JU782   | M   | 819.0       | 5.8       | 48.4       | 0.8      | 24            |
| JU782   | H   | 972         | 10.7      | 62         | 0.9      | 15            |
| JU393   | M   | 764.0       | 6.9       | 47.2       | 0.7      | 17            |
| JU393   | H   | 1018        | 9.0       | 62         | 0.7      | 29            |
