# Supplementary material
Source: publisher figshare collection journal article supplement (https://gsajournals.figshare.com/articles/dataset/_/9389255)
Supplement: Supplementary file 1 [file 2]

## Sheet: 1 male sperm size
Strain	Individual	Diameter 1	Diameter 2	Mean Diameter	Cross-sectional area	Volume
KR314	666	3.72633	3.52822	3.62727	10.3259	24.9884
KR314	666	4.69024	4.50015	4.5952	16.5773	50.8056
KR314	666	3.9961	4.21519	4.10565	13.2295	36.2363
KR314	666	5.21921	5.39479	5.307	22.1141	78.2612
KR314	666	4.17356	4.39402	4.28379	14.4032	41.1607
KR314	666	5.11905	5.4709	5.29497	21.9957	77.7302
KR314	666	3.86932	4.09524	3.98228	12.4452	33.0669
KR314	666	5.38029	5.95994	5.67011	25.1847	95.4495
KR314	666	5.54734	4.06504	4.80619	17.7108	58.1301
KR314	666	3.84935	3.86932	3.85934	11.698	30.0979
KR314	666	5.51338	5.57874	5.54606	24.1571	89.3208
KR314	666	3.56303	3.94883	3.75593	11.0504	27.7429
KR314	666	4.60117	4.52882	4.565	16.366	49.8104
KR314	666	3.59733	3.71933	3.65833	10.5083	25.6358
KR314	666	4.45971	4.13448	4.2971	14.4817	41.5456
KR314	666	4.06026	3.9734	4.01683	12.6709	33.9351
KR314	666	5.80159	5.46032	5.63095	24.8802	93.4855
KR314	666	4.78324	4.89688	4.84006	18.3963	59.3678
KR314	666	4.83972	4.41757	4.62864	16.7916	51.923
KR314	666	5.35145	5.80278	5.57712	24.3892	90.8297
KR314	667	5.05165	5.26972	5.16068	20.9079	71.9648
KR314	667	5.40435	4.99756	5.20095	21.2125	73.6626
KR314	667	6.75868	5.81165	6.28517	30.8497	130.002
KR314	667	5.15062	6.71551	5.93306	27.1661	109.354
KR314	667	6.59094	6.61842	6.60468	34.2603	150.853
KR314	667	5.3477	5.3477	5.3477	22.4607	80.0754
KR314	667	5.15812	6.34796	5.75304	25.7167	99.6991
KR314	667	5.71627	5.72856	5.72241	25.7186	98.1152
KR314	667	5.35504	5.46629	5.41066	22.9903	82.9373
KR314	667	6.2234	6.32151	6.27245	30.8986	129.214
KR314	667	5.74221	5.27842	5.51031	23.8052	87.6047
KR314	667	5.11905	5.13048	5.12476	20.627	70.4726
KR314	667	6.0473	5.1443	5.5958	24.4331	91.7457
KR314	667	5.60194	6.04525	5.8236	26.5976	103.413
KR314	667	5.91967	5.80602	5.86285	26.9939	105.517
KR314	667	6.03877	5.57515	5.80696	26.4421	102.529
KR314	667	6.10481	5.67992	5.89237	27.2336	107.119
KR314	667	5.47926	5.91967	5.69946	25.4747	96.9394
KR314	667	6.18176	6.31844	6.2501	30.6769	127.838
KR314	667	5.81165	5.40554	5.6086	24.6734	92.3766
KR314	668	5.09874	5.79374	5.44624	23.2013	84.5841
KR314	668	5.23781	6.08467	5.66124	25.0309	95.0021
KR314	668	4.45971	4.92179	4.69075	17.2393	54.0414
KR314	668	5.56014	6.05583	5.80799	26.4454	102.583
KR314	668	4.99756	4.86907	4.93331	19.1114	62.8658
KR314	668	4.95592	5.2931	5.12451	20.6027	70.462
KR314	668	4.98715	5.93281	5.45998	23.2382	85.2258
KR314	668	5.69801	4.83972	5.26887	21.6587	76.5861
KR314	668	4.85968	5.64785	5.25376	21.5566	75.9295
KR314	668	4.88494	4.93493	4.90993	18.9335	61.9763
KR314	668	5.26972	5.95567	5.61269	24.6495	92.5791
KR314	668	5.82377	5.332	5.57788	24.3885	90.8672
KR314	668	4.45971	5.26358	4.86164	18.4365	60.1656
KR314	668	4.92316	3.97989	4.45152	15.3888	46.1875
KR314	668	4.70952	5.39599	5.05276	19.959	67.5435
KR314	668	6.08996	6.15241	6.12119	29.4273	120.09
KR314	668	5.332	5.36101	5.3465	22.4505	80.0218
KR314	668	5.55553	5.55434	5.55493	24.2353	89.7502
KR314	668	4.73427	4.93886	4.83656	18.3641	59.2391
KR314	668	3.81557	4.39112	4.10334	13.159	36.1753
KR314	669	5.51799	5.46987	5.49393	23.7054	86.8258
KR314	669	5.01684	5.24395	5.13039	20.6623	70.7051
KR314	669	4.78324	5.12417	4.9537	19.2502	63.6485
KR314	669	5.44377	5.24395	5.34386	22.4206	79.9031
KR314	669	4.57302	4.50732	4.54017	16.1887	49.0021
KR314	669	4.71925	5.04909	4.88417	18.7144	61.0057
KR314	669	5.48984	5.64785	5.56884	24.3519	90.426
KR314	669	5.14806	5.49103	5.31954	22.2017	78.8173
KR314	669	5.68897	5.96864	5.8288	26.6685	103.69
KR314	669	5.43779	6.03331	5.73555	25.7673	98.7925
KR314	669	5.13679	5.73913	5.43796	23.1541	84.1991
KR314	669	5.56406	5.20095	5.38251	22.7282	81.6493
KR314	669	5.42278	5.72651	5.57464	24.3894	90.7089
KR314	669	5.90226	5.80227	5.85227	26.8972	104.947
KR314	669	4.86907	5.3477	5.10838	20.4504	69.799
KR314	669	5.9427	5.61577	5.77923	26.211	101.067
KR314	669	5.62839	4.85968	5.24404	21.4824	75.5085
KR314	669	5.19925	4.80081	5.00003	19.604	65.451
KR314	669	5.17638	5.28832	5.23235	21.4998	75.0048
KR314	669	5.96864	6.41997	6.1943	30.0953	124.445
KR314	670	5.85278	5.23781	5.54529	24.077	89.2837
KR314	670	4.66396	4.6068	4.63538	16.875	52.1501
KR314	670	5.98707	5.71286	5.84996	26.8632	104.823
KR314	670	4.91258	5.50281	5.20769	21.2316	73.9494
KR314	670	5.71166	7.14414	6.4279	32.0481	139.061
KR314	670	3.56115	4.07783	3.81949	11.4054	29.1753
KR314	670	5.87257	6.35513	6.11385	29.3118	119.658
KR314	670	5.77582	6.05583	5.91583	27.4712	108.404
KR314	670	5.90329	5.54734	5.72531	25.7199	98.2645
KR314	670	5.13287	5.57874	5.3558	22.4898	80.4401
KR314	670	6.51604	5.79715	6.15659	29.668	122.186
KR314	670	6.82915	6.71551	6.77233	36.0193	162.635
KR314	670	6.12596	6.44403	6.285	31.0043	129.991
KR314	670	3.70363	4.34368	4.02366	12.635	34.1084
KR314	670	6.33158	7.01702	6.6743	34.8943	155.674
KR314	670	4.59127	4.35563	4.47345	15.7063	46.8734
KR314	670	4.46125	4.22748	4.34437	14.8125	42.9316
KR314	670	5.01052	4.89279	4.95165	19.2544	63.5696
KR314	670	5.68777	5.3477	5.51774	23.8891	87.9592
KR314	670	6.47508	6.87164	6.67336	34.9458	155.608
KR314	671	3.94388	4.26997	4.10693	13.2263	36.2702
KR314	671	5.87701	5.43779	5.6574	25.0997	94.809
KR314	671	5.77923	5.26972	5.52448	23.9193	88.282
KR314	671	5.2489	4.58564	4.91727	18.9042	62.2546
KR314	671	4.95985	4.98578	4.97281	19.4219	64.388
KR314	671	5.55434	6.06761	5.81097	26.4691	102.741
KR314	671	4.83972	5.39479	5.11726	20.5062	70.1633
KR314	671	4.35563	5.09874	4.72718	17.4423	55.3103
KR314	671	6.51194	5.57874	6.04534	28.5323	115.681
KR314	671	5.15062	4.35409	4.75235	17.6135	56.1985
KR314	671	5.59614	6.05481	5.82548	26.6121	103.513
KR314	671	5.09362	5.64785	5.37073	22.5943	81.1147
KR314	671	4.81156	4.93886	4.87521	18.6639	60.6707
KR314	671	5.52857	5.18815	5.35836	22.5276	80.5555
KR314	671	5.24395	5.0066	5.12528	20.6201	70.4937
KR314	671	5.57874	4.86907	5.2239	21.334	74.6421
KR314	671	5.31135	5.24395	5.27765	21.8753	76.9699
KR314	671	5.46151	5.59256	5.52704	23.9891	88.4047
KR314	671	4.20905	4.53036	4.3697	14.9764	43.6873
KR314	671	4.45971	4.55305	4.50638	15.9478	47.9163
JU397	672	6.01625	5.76695	5.8916	27.2497	107.077
JU397	672	5.47926	4.98971	5.23448	21.4727	75.0965
JU397	672	5.80039	5.81933	5.80986	26.5107	102.682
JU397	672	6.45307	5.64785	6.05046	28.6246	115.975
JU397	672	5.60194	5.6673	5.63462	24.9347	93.6683
JU397	672	5.89117	5.82377	5.85747	26.9461	105.227
JU397	672	5.8294	5.49803	5.66371	25.1722	95.1267
JU397	672	5.17058	5.40435	5.28746	21.9469	77.4
JU397	672	5.57874	5.3477	5.46322	23.4311	85.3777
JU397	672	4.99756	5.52277	5.26016	21.6773	76.2072
JU397	672	5.26972	5.32842	5.29907	22.0534	77.9107
JU397	672	5.91642	6.61944	6.26793	30.7589	128.935
JU397	672	5.76695	5.332	5.54947	24.1505	89.4858
JU397	672	6.07085	6.06437	6.06761	28.9151	116.964
JU397	672	5.36596	5.24395	5.30495	22.1002	78.1706
JU397	672	5.11273	5.64785	5.38029	22.6791	81.5484
JU397	672	6.1101	5.49803	5.80406	26.3843	102.375
JU397	672	5.95567	5.77582	5.86575	27.0168	105.674
JU397	672	5.71627	5.15062	5.43344	23.1239	83.9893
JU397	672	6.04628	5.09874	5.57251	24.2126	90.6048
JU397	673	5.76695	5.28815	5.52755	23.9519	88.4293
JU397	673	5.39479	5.05284	5.22382	21.4092	74.6384
JU397	673	4.77914	4.55595	4.66755	17.1009	53.2433
JU397	673	5.65706	5.72531	5.69119	25.4378	96.5177
JU397	673	6.11538	5.504	5.80969	26.4358	102.673
JU397	673	5.58454	5.57874	5.58164	24.4688	91.0508
JU397	673	5.18935	5.70142	5.44539	23.2373	84.5444
JU397	673	5.69801	6.05583	5.87692	27.1011	106.279
JU397	673	6.29267	6.09747	6.19507	30.1352	124.491
JU397	673	5.69238	5.84152	5.76695	26.1162	100.424
JU397	673	5.51338	5.79271	5.65305	25.0836	94.5904
JU397	673	4.97554	5.25248	5.11401	20.5256	70.03
JU397	673	5.59717	5.52277	5.55997	24.2781	89.9944
JU397	673	5.71286	5.28815	5.5005	23.7272	87.1376
JU397	673	5.87257	6.1101	5.99133	28.1816	112.608
JU397	673	5.15932	4.85968	5.0095	19.692	65.8236
JU397	673	4.77505	5.2931	5.03407	19.8508	66.797
JU397	673	5.3477	5.64785	5.49777	23.7214	87.0079
JU397	673	5.332	5.25248	5.29224	21.9961	77.61
JU397	673	5.69801	5.24395	5.47098	23.4678	85.7422
JU397	674	5.63061	5.71627	5.67344	25.2789	95.6177
JU397	674	5.91967	5.35145	5.63556	24.8805	93.7151
JU397	674	5.58454	5.55434	5.56944	24.3618	90.4551
JU397	674	5.13287	5.40793	5.2704	21.8012	76.6531
JU397	674	5.75227	6.05481	5.90354	27.3546	107.73
JU397	674	5.58454	5.88571	5.73513	25.8152	98.7705
JU397	674	5.47926	5.23406	5.35666	22.5242	80.4785
JU397	674	5.332	6.23585	5.78393	26.1142	101.313
JU397	674	5.65825	5.57874	5.6185	24.7918	92.8665
JU397	674	6.51996	5.84715	6.18355	29.9419	123.798
JU397	674	5.13048	5.50281	5.31664	22.1734	78.6885
JU397	674	5.0682	4.71362	4.89091	18.7628	61.2586
JU397	674	5.44735	5.58454	5.51594	23.8925	87.8736
JU397	674	6.15241	5.81165	5.98203	28.0825	112.084
JU397	674	5.95465	5.93281	5.94373	27.7464	109.945
JU397	674	5.2931	5.03885	5.16597	20.9474	72.1863
JU397	674	5.91642	6.04628	5.98135	28.0955	112.046
JU397	674	5.76695	5.43302	5.59998	24.608	91.9514
JU397	674	5.02588	5.08731	5.0566	20.0812	67.6976
JU397	674	5.69801	5.46151	5.57976	24.4414	90.959
JU397	675	4.44965	5.26358	4.85661	18.3949	59.9789
JU397	675	5.25248	5.36101	5.30675	22.1157	78.2499
JU397	675	4.58564	5.36101	4.97333	19.308	64.4079
JU397	675	4.10155	4.10155	4.10155	13.2125	36.1279
JU397	675	6.02904	6.04628	6.03766	28.6303	115.24
JU397	675	5.18815	5.81387	5.50101	23.6902	87.1619
JU397	675	5.28815	4.93493	5.11154	20.4963	69.9284
JU397	675	5.36101	5.70603	5.53352	24.0254	88.7162
JU397	675	5.19925	5.18815	5.1937	21.1857	73.3549
JU397	675	5.26358	5.48984	5.37671	22.695	81.3856
JU397	675	5.40435	5.55553	5.47994	23.5808	86.1641
JU397	675	4.58001	4.77505	4.67753	17.1765	53.5856
JU397	675	4.89279	5.31135	5.10207	20.4104	69.5405
JU397	675	4.89688	5.4709	5.18389	21.0411	72.94
JU397	675	5.26358	5.12024	5.19191	21.1671	73.279
JU397	675	5.10898	5.19925	5.15411	20.8624	71.6903
JU397	675	5.1931	5.55656	5.37483	22.6633	81.3004
JU397	675	5.11273	5.24395	5.17834	21.0573	72.7061
JU397	675	4.86975	5.2204	5.04508	19.9664	67.236
JU397	675	5.11905	4.98425	5.05165	20.0391	67.499
JU397	676	5.84152	5.69801	5.76976	26.142	100.571
JU397	676	5.71286	5.31135	5.51211	23.8313	87.6902
JU397	676	5.65825	5.61918	5.63872	24.9715	93.8727
JU397	676	4.93493	5.05284	4.99389	19.5842	65.2101
JU397	676	5.24395	5.19925	5.2216	21.4136	74.5434
JU397	676	5.18065	5.16427	5.17246	21.0127	72.4585
JU397	676	5.0682	4.98971	5.02895	19.8618	66.5934
JU397	676	5.64785	4.93886	5.29335	21.9078	77.6588
JU397	676	5.22911	5.24395	5.23653	21.5366	75.1847
JU397	676	4.73563	5.34173	5.03868	19.8678	66.9805
JU397	676	5.61918	5.1443	5.38174	22.7033	81.6144
JU397	676	5.24395	4.89279	5.06837	20.1514	68.1716
JU397	676	5.18815	5.1443	5.16623	20.9618	72.197
JU397	676	5.02213	5.11017	5.06615	20.1564	68.0821
JU397	676	5.14055	5.3936	5.26707	21.776	76.508
JU397	676	5.46271	5.52277	5.49274	23.6949	86.7691
JU397	676	5.74886	5.21051	5.47968	23.5262	86.152
JU397	676	4.98578	5.3064	5.14609	20.7789	71.3562
JU397	676	5.43779	5.11017	5.27398	21.8247	76.8095
JU397	676	5.28815	5.51338	5.40077	22.8987	82.483
JU397	677	5.38114	4.84586	5.1135	20.4803	70.009
JU397	677	5.46032	5.12195	5.29113	21.9656	77.5612
JU397	677	4.93152	4.42508	4.6783	17.1392	53.612
JU397	677	4.479	5.15863	4.81882	18.147	58.5895
JU397	677	4.92265	5.75176	5.3372	22.2377	79.605
JU397	677	6.52559	5.69136	6.10847	29.1693	119.343
JU397	677	5.23406	5.00523	5.11964	20.5756	70.2616
JU397	677	6.00652	5.50758	5.75705	25.9821	99.9077
JU397	677	6.08996	5.11905	5.6045	24.4846	92.1744
JU397	677	5.79374	5.46987	5.63181	24.8901	93.528
JU397	677	4.68478	5.70603	5.19541	20.9949	73.4273
JU397	677	5.61577	5.02213	5.31895	22.1507	78.7908
JU397	677	5.80159	5.2919	5.54674	24.1128	89.3538
JU397	677	5.81165	5.75688	5.78427	26.2771	101.331
JU397	677	4.8863	4.53036	4.70833	17.3861	54.6511
JU397	677	5.31869	4.66533	4.99201	19.4884	65.1366
JU397	677	5.05165	5.01684	5.03424	19.9046	66.8038
JU397	677	5.31135	5.74221	5.52678	23.9538	88.3924
JU397	677	5.18269	5.80159	5.49214	23.6152	86.7408
JU397	677	5.51475	5.57123	5.54299	24.1305	89.1725
AB1	1	5.57395	5.24092	5.40743	22.9435	82.7889
AB1	1	5.35149	5.59225	5.47187	23.5045	85.7839
AB1	1	5.98625	5.32698	5.65661	25.0453	94.7694
AB1	1	6.82531	5.99348	6.4094	32.1286	137.864
AB1	1	5.77368	5.54088	5.65728	25.1259	94.8028
AB1	1	5.41983	5.04311	5.23147	21.4671	74.967
AB1	1	5.1646	5.59565	5.38012	22.6974	81.5409
AB1	1	4.93638	5.17774	5.05706	20.0742	67.7162
AB1	1	5.01137	4.79806	4.90472	18.8848	61.7789
AB1	1	6.06094	5.70872	5.88483	27.175	106.709
AB1	1	5.33436	5.43504	5.3847	22.7706	81.7491
AB1	1	4.60763	4.82522	4.71643	17.4616	54.9336
AB1	1	5.82962	5.98699	5.9083	27.4119	107.991
AB1	1	5.70872	5.50147	5.6051	24.6665	92.2035
AB1	1	5.7595	5.7595	5.7595	26.0531	100.035
AB1	1	5.56184	5.5462	5.55402	24.2272	89.7058
AB1	1	5.68835	5.20003	5.44419	23.2318	84.4887
AB1	1	4.52807	4.04934	4.2887	14.4008	41.3025
AB1	1	5.73338	5.63713	5.68525	25.3839	96.2161
AB1	1	5.3261	5.43504	5.38057	22.7353	81.561
AB1	2	6.4511	5.94477	6.19793	30.1202	124.664
AB1	2	5.74858	5.36964	5.55911	24.2435	89.9528
AB1	2	5.89576	5.8097	5.85273	26.9019	104.972
AB1	2	5.19353	5.13729	5.16541	20.955	72.1628
AB1	2	6.11896	5.91303	6.01599	28.4169	114.004
AB1	2	6.07379	6.84657	6.46018	32.6605	141.167
AB1	2	5.82638	6.34747	6.08692	29.0462	118.084
AB1	2	5.7595	5.69514	5.72732	25.762	98.368
AB1	2	5.7316	5.76615	5.74888	25.9568	99.4827
AB1	2	5.30513	5.28594	5.29554	22.0246	77.7551
AB1	2	6.24045	5.7257	5.98307	28.063	112.143
AB1	2	6.2961	5.89576	6.09593	29.1542	118.609
AB1	2	5.92115	5.3289	5.62502	24.7818	93.1905
AB1	2	5.7595	5.70533	5.73242	25.8081	98.6306
AB1	2	5.74932	5.29967	5.5245	23.9307	88.2829
AB1	2	5.19722	5.23811	5.21767	21.3814	74.3752
AB1	2	5.7384	5.85944	5.79892	26.4081	102.103
AB1	2	5.82638	5.33702	5.5817	24.4223	91.0537
AB1	2	5.74858	5.81545	5.78202	26.2563	101.213
AB1	2	5.10319	4.40658	4.75488	17.6617	56.2883
AB1	3	5.98699	5.8097	5.89834	27.3182	107.445
AB1	3	5.86033	5.45807	5.6592	25.1218	94.8993
AB1	3	5.01521	5.90565	5.46043	23.262	85.2469
AB1	3	4.58756	4.26368	4.42562	15.3623	45.3859
AB1	3	4.80515	4.79304	4.7991	18.0887	57.8731
AB1	3	5.68835	5.20475	5.44655	23.2529	84.5987
AB1	3	4.69502	5.63359	5.1643	20.7736	72.1164
AB1	3	4.67849	5.713	5.19575	20.9923	73.4417
AB1	3	6.44741	6.34747	6.39744	32.1422	137.094
AB1	3	5.06127	5.04503	5.05315	20.0545	67.5592
AB1	3	5.57144	5.14954	5.36049	22.5334	80.6515
AB1	3	4.92059	4.71658	4.81858	18.2278	58.5809
AB1	3	5.6516	5.53306	5.59233	24.5599	91.5748
AB1	3	6.22805	5.20475	5.7164	25.459	97.8062
AB1	3	5.53306	4.59494	5.064	19.968	67.9953
AB1	3	5.16637	5.08046	5.12341	20.6148	70.4169
AB1	3	4.88604	5.29701	5.09153	20.3272	69.1104
AB1	3	5.5084	5.14954	5.32897	22.2784	79.2372
AB1	3	5.5462	5.19722	5.37171	22.639	81.1589
AB1	3	6.03216	5.67728	5.85472	26.8969	105.079
AB1	4	5.41983	5.63964	5.52974	24.0064	88.5343
AB1	4	5.43504	5.56701	5.50102	23.7637	87.1624
AB1	4	5.4439	5.42795	5.43592	23.2079	84.1044
AB1	4	5.39474	5.63964	5.51719	23.8952	87.933
AB1	4	6.1656	6.18051	6.17306	29.9289	123.169
AB1	4	5.64731	5.91539	5.78135	26.2371	101.178
AB1	4	5.33436	5.37584	5.3551	22.5226	80.4085
AB1	4	4.57914	5.23073	4.90494	18.8121	61.7873
AB1	4	5.91864	5.28137	5.6	24.5504	91.9524
AB1	4	5.78637	5.19353	5.48995	23.6026	86.6372
AB1	4	5.59476	5.23073	5.41275	22.9844	83.0332
AB1	4	4.98037	4.99971	4.99004	19.5567	65.0595
AB1	4	5.45807	4.98908	5.22357	21.387	74.628
AB1	4	4.13451	4.67539	4.40495	15.1821	44.753
AB1	4	5.4873	5.55402	5.52066	23.9362	88.099
AB1	4	5.32698	4.92059	5.12378	20.5868	70.4321
AB1	4	4.82626	4.57914	4.7027	17.3574	54.4553
AB1	4	5.28594	5.13449	5.21021	21.3162	74.0569
AB1	4	5.5059	5.15604	5.33097	22.2964	79.3262
AB1	4	5.59565	5.22985	5.41275	22.9842	83.0332
AB1	5	6.68626	6.4421	6.56418	33.8299	148.095
AB1	5	3.56736	3.45561	3.51149	9.68194	22.6711
AB1	5	6.1656	6.27765	6.22163	30.3992	126.099
AB1	5	6.7983	6.57008	6.68419	35.0801	156.367
AB1	5	5.8122	5.4154	5.6138	24.7208	92.634
AB1	5	5.47755	5.95702	5.71729	25.6275	97.8517
AB1	5	4.97934	4.87113	4.92524	19.0498	62.5575
AB1	5	6.26909	6.4263	6.34769	31.6414	133.92
AB1	5	5.55402	5.79375	5.67389	25.273	95.6402
AB1	5	4.88604	4.35919	4.62262	16.7283	51.7204
AB1	5	6.17727	6.10006	6.13866	29.5951	121.121
AB1	5	6.35131	6.08648	6.2189	30.3612	125.933
AB1	5	6.20709	6.02168	6.11438	29.3559	119.69
AB1	5	4.40658	4.29645	4.35151	14.8697	43.1439
AB1	5	6.10877	6.10154	6.10515	29.2741	119.149
AB1	5	5.21582	5.17774	5.19678	21.2106	73.4855
AB1	5	5.70533	5.27502	5.49017	23.6371	86.6477
AB1	5	5.63624	5.64731	5.64178	24.9989	94.0257
AB1	5	5.55402	5.04503	5.29952	22.007	77.9308
AB1	5	6.03216	5.10422	5.56819	24.182	90.3943
AB1	6	5.94565	5.63359	5.78962	26.3072	101.613
AB1	6	6.23809	5.7384	5.98824	28.1146	112.434
AB1	6	5.53306	5.02289	5.27797	21.8277	76.9839
AB1	6	5.46884	5.58266	5.52575	23.9787	88.343
AB1	6	5.94801	6.22421	6.08611	29.0768	118.037
AB1	6	5.64731	5.32698	5.48715	23.6272	86.5045
AB1	6	5.85944	5.6017	5.73057	25.779	98.5354
AB1	6	5.67905	5.92528	5.80217	26.4286	102.275
AB1	6	5.76703	5.57483	5.67093	25.2507	95.491
AB1	6	5.21582	5.17951	5.19767	21.2179	73.5231
AB1	6	5.10422	4.90287	5.00355	19.6549	65.5893
AB1	6	5.79375	5.52509	5.65942	25.1414	94.9105
AB1	6	4.98908	4.70949	4.84929	18.4537	59.7079
AB1	6	5.28594	5.37053	5.32824	22.2961	79.2043
AB1	6	5.96765	6.03216	5.9999	28.2726	113.092
AB1	6	6.05784	5.1184	5.58812	24.3524	91.3683
AB1	6	5.51903	5.29052	5.40478	22.9325	82.6669
AB1	6	5.44832	4.86124	5.15478	20.8018	71.7183
AB1	6	5.50147	5.3912	5.44633	23.2945	84.5884
AB1	6	6.07379	6.13726	6.10552	29.2768	119.17
AB1	7	6.1687	6.07615	6.12243	29.4383	120.163
AB1	7	5.70193	5.25199	5.47696	23.5199	86.0236
AB1	7	6.27691	5.97813	6.12752	29.4714	120.463
AB1	7	5.89827	6.03216	5.96521	27.9439	111.141
AB1	7	5.68835	5.42072	5.55454	24.2177	89.7309
AB1	7	5.17198	4.76972	4.97085	19.3749	64.3118
AB1	7	5.8122	5.72157	5.76689	26.1184	100.421
AB1	7	5.63964	5.46884	5.55424	24.2235	89.7166
AB1	7	5.27502	4.889	5.08201	20.2551	68.7234
AB1	7	5.5896	5.26026	5.42493	23.0928	83.595
AB1	7	5.79375	5.92528	5.85952	26.9624	105.338
AB1	7	5.98462	5.77368	5.87915	27.1381	106.4
AB1	7	5.35429	4.52703	4.94066	19.0373	63.1472
AB1	7	4.6097	4.4296	4.51965	16.0372	48.3408
AB1	7	5.57055	5.59476	5.58266	24.4777	91.1007
AB1	7	5.84217	5.17951	5.51084	23.7658	87.6299
AB1	7	5.8122	5.29967	5.55594	24.1924	89.7989
AB1	7	5.5084	5.42707	5.46774	23.4791	85.5896
AB1	7	6.18051	6.36031	6.27041	30.874	129.088
AB1	7	5.15707	5.2418	5.19944	21.2312	73.5983
AB4	8	4.45588	4.50666	4.48127	15.7717	47.1197
AB4	8	5.13729	5.76703	5.45216	23.2689	84.8604
AB4	8	4.89505	5.55402	5.22453	21.3528	74.6691
AB4	8	5.28594	5.7257	5.50582	23.7706	87.3907
AB4	8	5.10983	5.28594	5.19789	21.2138	73.5325
AB4	8	5.44832	5.77368	5.611	24.7062	92.4952
AB4	8	5.27502	5.32255	5.29879	22.0513	77.8982
AB4	8	4.09333	4.13806	4.11569	13.3034	36.5029
AB4	8	5.45895	5.64731	5.55313	24.2126	89.6629
AB4	8	5.24919	5.19634	5.22276	21.4229	74.5932
AB4	8	5.19353	5.33436	5.26395	21.7588	76.3718
AB4	8	5.54708	5.68835	5.61772	24.7823	92.8278
AB4	8	5.16637	5.3261	5.24623	21.6115	75.6034
AB4	8	4.92059	5.02289	4.97174	19.4115	64.3462
AB4	8	5.01521	5.23811	5.12666	20.6326	70.5509
AB4	8	5.27502	5.40463	5.33982	22.3913	79.7222
AB4	8	3.4906	3.88194	3.68627	10.6424	26.2277
AB4	8	3.98542	4.18692	4.08617	13.1056	35.723
AB4	8	5.35429	5.08046	5.21737	21.3646	74.3626
AB4	8	5.23073	5.29967	5.2652	21.7722	76.4265
AB4	9	4.93638	5.41363	5.17501	20.9888	72.5657
AB4	9	4.94524	5.29701	5.12113	20.5735	70.3226
AB4	9	5.63713	5.7384	5.68776	25.4061	96.3436
AB4	9	4.85519	5.06127	4.95823	19.2999	63.8232
AB4	9	5.44832	5.76703	5.60768	24.6777	92.3311
AB4	9	4.22722	4.60129	4.41425	15.2765	45.0371
AB4	9	5.51549	5.76615	5.64082	24.9781	93.9778
AB4	9	5.99584	6.33286	6.16435	29.8222	122.648
AB4	9	5.27502	4.96768	5.12135	20.581	70.3317
AB4	9	5.77958	6.22495	6.00226	28.2567	113.225
AB4	9	5.35429	5.84704	5.60067	24.5883	91.9852
AB4	9	5.35606	5.93502	5.64554	24.9665	94.2141
AB4	9	5.37776	5.36241	5.37009	22.6491	81.0853
AB4	9	5.63624	5.72157	5.6789	25.3276	95.8942
AB4	9	4.13451	4.26029	4.1974	13.8342	38.7204
AB4	9	5.87347	5.7384	5.80593	26.4713	102.474
AB4	9	5.46619	5.45895	5.46257	23.436	85.3472
AB4	9	5.71138	6.01607	5.86372	26.9863	105.565
AB4	9	4.9138	5.01801	4.9659	19.366	64.12
AB4	9	4.79806	5.02776	4.91291	18.9465	62.089
AB4	10	5.57483	5.63964	5.60724	24.693	92.3092
AB4	10	5.5983	5.45895	5.52863	24.0025	88.4812
AB4	10	5.5059	5.46884	5.48737	23.649	86.5149
AB4	10	5.77619	5.65425	5.71522	25.6511	97.7456
AB4	10	3.89936	4.42311	4.16123	13.546	37.7281
AB4	10	5.10703	5.99348	5.55025	24.0402	89.5236
AB4	10	5.38396	5.55402	5.46899	23.4855	85.6486
AB4	10	5.8097	5.15235	5.48102	23.5098	86.2151
AB4	10	5.38396	5.45807	5.42101	23.0797	83.4143
AB4	10	5.08046	5.41275	5.2466	21.5978	75.6194
AB4	10	4.24892	4.7991	4.52401	16.015	48.4807
AB4	10	4.83128	5.24919	5.04023	19.9179	67.0425
AB4	10	5.56701	5.89827	5.73264	25.7891	98.6421
AB4	10	5.91303	6.00647	5.95975	27.8945	110.836
AB4	10	5.65765	5.77368	5.71566	25.6554	97.7683
AB4	10	3.7975	4.01568	3.90659	11.977	31.2171
AB4	10	5.42338	5.37584	5.39961	22.8985	82.4301
AB4	10	6.08323	5.91303	5.99813	28.251	112.992
AB4	10	6.37478	6.69201	6.5334	33.5052	146.021
AB4	10	4.85829	5.23162	5.04495	19.9622	67.2311
AB4	11	5.7595	6.2716	6.01555	28.3696	113.979
AB4	11	5.51903	5.97813	5.74858	25.913	99.4674
AB4	11	5.92528	5.48287	5.70407	25.5156	97.1749
AB4	11	5.90476	5.61646	5.76061	26.0468	100.093
AB4	11	5.6293	6.1656	5.89745	27.2597	107.397
AB4	11	5.97075	5.40463	5.68769	25.3445	96.3398
AB4	11	5.89576	5.91303	5.90439	27.3804	107.777
AB4	11	5.41629	5.67905	5.54767	24.1584	89.3986
AB4	11	6.28075	6.30141	6.29108	31.0842	130.369
AB4	11	4.00609	3.67704	3.84156	11.5693	29.684
AB4	11	5.34794	5.5059	5.42692	23.1262	83.6871
AB4	11	5.63624	6.41567	6.02596	28.4002	114.572
AB4	11	5.84217	5.59565	5.71891	25.6752	97.9351
AB4	11	5.5084	5.8097	5.65905	25.1344	94.8919
AB4	11	5.72659	5.60347	5.66503	25.2025	95.193
AB4	11	5.92528	5.57144	5.74836	25.9278	99.4559
AB4	11	5.32698	5.60347	5.46523	23.4438	85.4718
AB4	11	4.94229	5.05846	5.00037	19.6352	65.4645
AB4	11	5.32698	5.15604	5.24151	21.5718	75.3994
AB4	11	5.35429	5.08046	5.21737	21.3646	74.3626
AB4	12	5.46884	5.19722	5.33303	22.3232	79.4185
AB4	12	4.79806	5.7257	5.26188	21.5767	76.2819
AB4	12	4.18692	4.44599	4.31645	14.6202	42.1095
AB4	12	5.14954	5.4439	5.29672	22.0175	77.8071
AB4	12	4.76972	5.32698	5.04835	19.9556	67.367
AB4	12	4.60763	4.92944	4.76854	17.8388	56.7746
AB4	12	5.42072	5.7384	5.57956	24.4308	90.949
AB4	12	5.10703	5.11751	5.11227	20.5266	69.9584
AB4	12	5.53306	5.82889	5.68097	25.3303	95.9989
AB4	12	5.57144	5.38396	5.4777	23.5591	86.0584
AB4	12	4.93638	5.24092	5.08865	20.3192	68.9932
AB4	12	4.67849	4.83128	4.75488	17.7524	56.2883
AB4	12	4.98908	5.06614	5.02761	19.8512	66.5401
AB4	12	5.72659	5.55402	5.6403	24.98	93.9519
AB4	12	4.0576	4.13924	4.09842	13.1911	36.0453
AB4	12	5.45807	5.35429	5.40618	22.9525	82.7313
AB4	12	5.06614	5.23162	5.14888	20.8163	71.4721
AB4	12	5.47755	5.68835	5.58295	24.4716	91.1151
AB4	12	5.04311	5.38042	5.21176	21.311	74.123
AB4	12	5.3723	5.47239	5.42234	23.0902	83.4756
AB4	13	5.06127	5.19634	5.1288	20.656	70.6393
AB4	13	5.79626	6.36341	6.07984	28.9686	117.672
AB4	13	5.46619	5.7384	5.60229	24.6357	92.0652
AB4	13	5.29967	5.82638	5.56302	24.2514	90.1429
AB4	13	5.42072	5.76703	5.59388	24.5527	91.651
AB4	13	4.23637	4.58328	4.40982	15.2497	44.9017
AB4	13	5.10983	4.71658	4.9132	18.9288	62.1002
AB4	13	5.23811	4.97934	5.10873	20.485	69.813
AB4	13	4.07783	4.27269	4.17526	13.6842	38.1108
AB4	13	5.15146	5.45807	5.30476	22.0831	78.1622
AB4	13	5.29052	5.54708	5.4188	23.049	83.3121
AB4	13	5.08046	5.62325	5.35185	22.4378	80.2623
AB4	13	5.10983	5.4873	5.29856	22.0219	77.8885
AB4	13	4.00609	4.07429	4.04019	12.8192	34.5305
AB4	13	5.42072	5.45895	5.43984	23.2411	84.2861
AB4	13	5.90801	6.0354	5.97171	28.0051	111.505
AB4	13	4.56527	4.88708	4.72617	17.5229	55.2748
AB4	13	5.32698	5.63359	5.48028	23.5698	86.1802
AB4	13	5.23162	5.3723	5.30196	22.0743	78.0383
AB4	13	5.85369	6.2062	6.02994	28.5328	114.799
AB4	14	3.96711	4.17644	4.07178	13.0128	35.3468
AB4	14	4.80707	4.92944	4.86825	18.6109	60.4113
AB4	14	5.51903	5.94565	5.73234	25.7723	98.6268
AB4	14	5.30794	5.32255	5.31525	22.1889	78.6264
AB4	14	4.48939	4.29645	4.39292	15.1491	44.3873
AB4	14	5.06614	4.7616	4.91387	18.9461	62.1254
AB4	14	5.39474	5.3723	5.38352	22.7625	81.6954
AB4	14	5.06127	5.41275	5.23701	21.5163	75.2052
AB4	14	4.64218	5.29052	4.96635	19.289	64.1372
AB4	14	5.44832	5.90565	5.67699	25.2709	95.797
AB4	14	5.32255	5.41629	5.36942	22.6418	81.0552
AB4	14	5.06614	5.21686	5.1415	20.7575	71.1652
AB4	14	5.03824	5.7257	5.38197	22.6567	81.6248
AB4	14	5.29967	5.60347	5.45157	23.3236	84.8328
AB4	14	5.54	5.28594	5.41297	22.9997	83.0434
AB4	14	5.21582	5.46619	5.341	22.3922	79.7751
AB4	14	4.84633	5.28137	5.06385	20.1025	67.9894
AB4	14	6.08648	5.85369	5.97008	27.9824	111.414
AB4	14	5.82962	5.713	5.77131	26.1574	100.652
AB4	14	3.82924	4.32125	4.07525	12.9961	35.4372
CB4852	15	5.58266	5.7257	5.65418	25.105	94.6471
CB4852	15	6.04264	5.33436	5.6885	25.3162	96.3811
CB4852	15	6.40209	6.04264	6.22236	30.3835	126.144
CB4852	15	5.59225	5.34794	5.4701	23.4889	85.7006
CB4852	15	5.06614	5.27502	5.17058	20.989	72.3796
CB4852	15	5.68835	5.70533	5.69684	25.4892	96.8057
CB4852	15	5.84704	5.29701	5.57203	24.3252	90.5813
CB4852	15	4.88604	4.26929	4.57767	16.3834	50.2263
CB4852	15	5.29052	5.02968	5.1601	20.8991	71.9403
CB4852	15	3.60382	3.62124	3.61253	10.2497	24.6851
CB4852	15	5.35872	5.14954	5.25413	21.673	75.9454
CB4852	15	4.17526	3.71365	3.94445	12.178	32.1336
CB4852	15	5.22335	4.53663	4.87999	18.6111	60.8493
CB4852	15	5.39474	5.1184	5.25657	21.6867	76.051
CB4852	15	5.29701	4.98908	5.14305	20.7559	71.2296
CB4852	15	5.60347	4.90287	5.25317	21.5773	75.9038
CB4852	15	5.16637	4.62638	4.89638	18.7723	61.4643
CB4852	15	5.40463	5.15604	5.28033	21.8863	77.0873
CB4852	15	5.33436	6.28769	5.81102	26.3429	102.744
CB4852	15	5.27502	5.42795	5.35149	22.488	80.2457
CB4852	16	5.82638	6.35131	6.08884	29.0638	118.196
CB4852	16	5.8097	6.00322	5.90646	27.3923	107.89
CB4852	16	4.66712	4.75038	4.70875	17.4128	54.6659
CB4852	16	5.77958	5.68584	5.73271	25.8096	98.6459
CB4852	16	4.31328	4.59287	4.45308	15.559	46.2359
CB4852	16	6.01046	5.63624	5.82335	26.6065	103.399
CB4852	16	5.84704	6.03216	5.9396	27.7012	109.716
CB4852	16	5.58266	5.84217	5.71241	25.6156	97.6018
CB4852	16	6.63533	6.22421	6.42977	32.4367	139.183
CB4852	16	4.59494	4.27726	4.4361	15.436	45.7091
CB4852	16	6.519	5.82889	6.17395	29.844	123.222
CB4852	16	5.20003	5.19634	5.19818	21.2223	73.545
CB4852	16	5.58177	5.26114	5.42146	23.0644	83.4347
CB4852	16	5.6516	5.59565	5.62362	24.8377	93.1208
CB4852	16	4.86124	4.87113	4.86619	18.598	60.3344
CB4852	16	5.63359	4.98908	5.31133	22.0747	78.453
CB4852	16	5.63713	5.10422	5.37068	22.5984	81.1121
CB4852	16	5.32255	4.99676	5.15965	20.8881	71.9218
CB4852	16	4.92944	4.58756	4.7585	17.7611	56.4169
CB4852	16	5.02776	4.52807	4.77791	17.8804	57.1101
CB4852	17	5.48464	4.92162	5.20313	21.2005	73.7551
CB4852	17	6.03216	5.77619	5.90417	27.3655	107.764
CB4852	17	6.33286	5.9644	6.14863	29.6658	121.712
CB4852	17	5.29967	4.8791	5.08939	20.3086	69.0232
CB4852	17	5.14954	5.06614	5.10784	20.4897	69.7767
CB4852	17	5.92528	5.36964	5.64746	24.9887	94.3102
CB4852	17	5.41275	5.01034	5.21154	21.2998	74.1135
CB4852	17	6.08648	5.22335	5.65492	24.9692	94.6841
CB4852	17	4.80205	4.27269	4.53737	16.1145	48.9114
CB4852	17	5.73338	5.239	5.48619	23.5911	86.4591
CB4852	17	5.84704	5.74858	5.79781	26.399	102.045
CB4852	17	5.77619	5.57144	5.67381	25.2754	95.6364
CB4852	17	5.99112	5.49172	5.74142	25.8408	99.0962
CB4852	17	4.72484	4.53663	4.63074	16.8349	51.9934
CB4852	17	5.32255	5.26852	5.29554	22.0241	77.7551
CB4852	17	5.25657	4.98908	5.12282	20.5974	70.3926
CB4852	17	5.49172	5.54708	5.5194	23.9256	88.0389
CB4852	17	5.9644	5.73249	5.84845	26.8534	104.742
CB4852	17	5.5084	5.41275	5.46058	23.4171	85.2539
CB4852	17	4.76057	4.95306	4.85681	18.5192	59.9864
CB4852	18	5.36241	4.82626	5.09433	20.3264	69.2246
CB4852	18	5.13729	4.64218	4.88973	18.7303	61.2145
CB4852	18	4.62638	4.72588	4.67613	17.1717	53.5375
CB4852	18	4.7402	5.04503	4.89261	18.7823	61.3227
CB4852	18	5.07942	5.27502	5.17722	21.044	72.6589
CB4852	18	4.95306	4.75643	4.85475	18.5031	59.9099
CB4852	18	5.15707	4.9138	5.03543	19.9026	66.8512
CB4852	18	5.19634	5.29967	5.248	21.629	75.68
CB4852	18	5.11456	4.70432	4.90944	18.8971	61.9576
CB4852	18	5.10422	4.78891	4.94657	19.198	63.3739
CB4852	18	4.88708	5.42072	5.1539	20.8063	71.6813
CB4852	18	4.18456	3.84946	4.01701	12.6514	33.9396
CB4852	18	5.65425	5.54088	5.59757	24.6062	91.8325
CB4852	18	5.3912	5.50147	5.44633	23.2945	84.5884
CB4852	18	6.02492	5.36241	5.69367	25.3747	96.644
CB4852	18	5.5983	6.31071	5.95451	27.7476	110.544
CB4852	18	5.28137	5.06038	5.17087	20.9903	72.392
CB4852	18	6.22421	5.45895	5.84158	26.686	104.373
CB4852	18	5.57055	5.8122	5.69138	25.429	96.5275
CB4852	18	5.49792	5.41629	5.45711	23.3879	85.0915
CB4852	19	5.01905	4.7647	4.89187	18.7822	61.2949
CB4852	19	4.59494	4.64528	4.62011	16.7641	51.6363
CB4852	19	4.72794	4.73296	4.73045	17.575	55.4251
CB4852	19	5.62325	5.26395	5.4436	23.2482	84.4612
CB4852	19	5.4563	5.10319	5.27974	21.869	77.0614
CB4852	19	5.2418	5.08046	5.16113	20.9158	71.9835
CB4852	19	4.82626	4.98908	4.90767	18.9113	61.8906
CB4852	19	4.94524	4.56645	4.75584	17.736	56.3224
CB4852	19	5.56878	5.55668	5.56273	24.3033	90.1285
CB4852	19	5.15604	4.80707	4.98155	19.4664	64.7281
CB4852	19	5.43504	5.13729	5.28616	21.9294	77.3429
CB4852	19	5.08046	4.79806	4.93926	19.1451	63.0934
CB4852	19	5.39474	5.10703	5.25088	21.6386	75.8046
CB4852	19	5.24919	4.98908	5.11913	20.5685	70.2406
CB4852	19	4.80618	5.11751	4.96185	19.3174	63.9629
CB4852	19	5.35606	5.31429	5.33517	22.3553	79.5141
CB4852	19	4.99676	4.7616	4.87918	18.6866	60.8189
CB4852	19	5.25657	5.17951	5.21804	21.3836	74.391
CB4852	19	4.66712	4.54932	4.60822	16.6758	51.2388
CB4852	19	5.21951	4.88604	5.05278	20.0298	67.5444
CB4852	20	5.1184	5.08046	5.09943	20.4233	69.4325
CB4852	20	5.76703	5.04119	5.40411	22.8337	82.6364
CB4852	20	4.98037	5.19722	5.0888	20.3293	68.9992
CB4852	20	5.78962	5.98625	5.88793	27.2204	106.878
CB4852	20	5.60347	5.22985	5.41666	23.0163	83.2134
CB4852	20	4.38901	4.31328	4.35115	14.8684	43.133
CB4852	20	5.29701	4.88604	5.09153	20.3272	69.1104
CB4852	20	5.51903	4.95306	5.23605	21.4697	75.1639
CB4852	20	5.02968	4.7616	4.89564	18.8097	61.4365
CB4852	20	5.45895	5.35429	5.40662	22.9563	82.7516
CB4852	20	4.80205	4.53663	4.66934	17.11	53.3046
CB4852	20	5.21582	4.94125	5.07854	20.2418	68.5827
CB4852	20	5.5059	5.16637	5.33613	22.341	79.557
CB4852	20	5.41629	5.11456	5.26542	21.757	76.4361
CB4852	20	5.59565	5.20844	5.40205	22.8901	82.5417
CB4852	20	5.0499	4.8422	4.94605	19.205	63.354
CB4852	20	5.47239	5.30513	5.38876	22.8015	81.9342
CB4852	20	5.43504	5.21686	5.32595	22.269	79.1023
CB4852	20	5.08046	4.84633	4.9634	19.3378	64.0229
CB4852	20	5.39474	5.44832	5.42153	23.0846	83.4381
CB4852	21	5.64731	5.5059	5.5766	24.4208	90.8047
CB4852	21	5.52509	4.86124	5.19316	21.0948	73.3322
CB4852	21	5.57483	5.29967	5.43725	23.2044	84.1661
CB4852	21	6.27691	5.94152	6.10921	29.2909	119.386
CB4852	21	4.734	5.01521	4.8746	18.6469	60.648
CB4852	21	5.93502	5.44832	5.69167	25.3966	96.5425
CB4852	21	4.99971	4.24995	4.62483	16.6886	51.7948
CB4852	21	5.13257	4.90287	5.01772	19.764	66.1481
CB4852	21	5.63359	5.21582	5.4247	23.078	83.5847
CB4852	21	3.86703	4.49264	4.17983	13.6448	38.2363
CB4852	21	4.69502	4.53131	4.61317	16.7091	51.404
CB4852	21	3.62124	4.11104	3.86614	11.6923	30.2574
CB4852	21	5.42795	5.15707	5.29251	21.9851	77.6219
CB4852	21	5.21951	4.89505	5.05728	20.0667	67.7251
CB4852	21	3.64663	3.15078	3.39871	9.02402	20.5561
CB4852	21	5.68835	5.01226	5.3503	22.3929	80.1926
CB4852	21	5.62325	5.3723	5.49778	23.7267	87.0081
CB4852	21	5.01226	4.81415	4.9132	18.9515	62.1002
CB4852	21	5.57055	5.04119	5.30587	22.0557	78.2112
CB4852	21	5.39474	4.77784	5.08629	20.2438	68.8972
CB4853	22	6.29374	6.41567	6.3547	31.7132	134.365
CB4853	22	5.74858	5.89576	5.82217	26.6189	103.336
CB4853	22	3.97199	3.91929	3.94564	12.2266	32.1625
CB4853	22	5.29967	4.92162	5.11065	20.4855	69.8917
CB4853	22	7.09191	5.87347	6.48269	32.7151	142.648
CB4853	22	6.08648	5.58531	5.8359	26.6995	104.069
CB4853	22	5.87347	5.53306	5.70326	25.524	97.1334
CB4853	22	5.64052	5.23073	5.43563	23.1724	84.0907
CB4853	22	3.78599	3.3663	3.57615	10.0097	23.9466
CB4853	22	6.82531	5.55668	6.191	29.7871	124.245
CB4853	22	4.6128	5.42972	5.02126	19.6713	66.2884
CB4853	22	5.89827	5.61646	5.75736	26.0182	99.924
CB4853	22	6.00647	5.64731	5.82689	26.641	103.588
CB4853	22	4.86228	4.84131	4.8518	18.4881	59.8007
CB4853	22	6.49007	6.20074	6.3454	31.607	133.776
CB4853	22	5.1184	4.70432	4.91136	18.9113	62.0303
CB4853	22	5.92602	5.59565	5.76083	26.0437	100.105
CB4853	22	3.74096	3.698	3.71948	10.8653	26.943
CB4853	22	4.24995	4.17526	4.2126	13.9366	39.1427
CB4853	22	5.01905	5.07278	5.04591	19.9967	67.2695
CB4853	23	5.90565	5.10983	5.50774	23.7009	87.4821
CB4853	23	4.8732	5.19353	5.03337	19.8777	66.7689
CB4853	23	5.01226	4.59287	4.80256	18.0804	57.9987
CB4853	23	6.26835	5.69514	5.98175	28.038	112.068
CB4853	23	5.91214	5.27502	5.59358	24.494	91.6365
CB4853	23	5.35872	4.83128	5.095	20.3335	69.2517
CB4853	23	5.4439	5.04119	5.24254	21.5542	75.444
CB4853	23	4.80707	4.45588	4.63147	16.823	52.0183
CB4853	23	3.92918	3.79883	3.864	11.7231	30.2072
CB4853	23	4.57811	4.88604	4.73208	17.5684	55.4822
CB4853	23	5.16357	5.02008	5.09182	20.3587	69.1224
CB4853	23	4.48836	4.51522	4.50179	15.9168	47.7699
CB4853	23	6.16472	5.7536	5.95916	27.8575	110.804
CB4853	23	4.17762	3.89316	4.03539	12.7738	34.4076
CB4853	23	5.91539	5.91539	5.91539	27.4825	108.38
CB4853	23	5.40463	5.3723	5.38846	22.8043	81.9207
CB4853	23	5.63964	5.76615	5.70289	25.5404	97.1145
CB4853	23	5.30513	5.51903	5.41208	22.9958	83.0027
CB4853	23	5.92115	5.54088	5.73101	25.7676	98.5583
CB4853	23	5.61646	5.47755	5.54701	24.1624	89.3665
CB4853	24	4.87113	4.21231	4.54172	16.1154	49.0524
CB4853	24	4.39787	4.48939	4.44363	15.5067	45.9422
CB4853	24	4.9138	4.84633	4.88006	18.7034	60.8521
CB4853	24	5.76703	5.54265	5.65484	25.105	94.6804
CB4853	24	5.76703	5.0499	5.40847	22.8731	82.8364
CB4853	24	5.3723	5.02776	5.20003	21.2141	73.6234
CB4853	24	5.68835	5.22985	5.4591	23.365	85.1847
CB4853	24	5.2418	5.06127	5.15154	20.8367	71.5828
CB4853	24	5.56701	5.43415	5.50058	23.7598	87.1414
CB4853	24	5.40463	4.79304	5.09884	20.3454	69.4083
CB4853	24	5.5084	5.42072	5.46456	23.4516	85.4407
CB4853	24	5.33436	5.28137	5.30786	22.1268	78.2993
CB4853	24	4.84633	5.65425	5.25029	21.5218	75.7791
CB4853	24	6.27691	6.07379	6.17535	29.943	123.306
CB4853	24	5.65765	5.82638	5.74201	25.8895	99.1268
CB4853	24	5.81383	4.82316	5.31849	22.0234	78.7706
CB4853	24	4.94125	4.94524	4.94325	19.1917	63.2463
CB4853	24	4.90287	5.05846	4.98067	19.4787	64.6936
CB4853	24	5.42972	5.57144	5.50058	23.7594	87.1414
CB4853	24	5.99112	5.5896	5.79036	26.3014	101.652
CB4853	25	5.15604	4.44599	4.80101	18.0042	57.9426
CB4853	25	5.92602	6.13003	6.02802	28.5309	114.689
CB4853	25	5.39474	5.08046	5.2376	21.526	75.2307
CB4853	25	4.53131	4.18116	4.35624	14.8803	43.2846
CB4853	25	4.27726	4.27269	4.27497	14.3535	40.9071
CB4853	25	5.70621	5.239	5.47261	23.4794	85.8186
CB4853	25	5.35429	5.85369	5.60399	24.6162	92.1489
CB4853	25	6.12147	6.13003	6.12575	29.4719	120.358
CB4853	25	6.1656	5.08046	5.62303	24.6019	93.0915
CB4853	25	5.61041	4.78286	5.19663	21.0752	73.4793
CB4853	25	6.03216	5.77619	5.90417	27.3655	107.764
CB4853	25	4.889	4.77784	4.83342	18.346	59.1237
CB4853	25	5.65425	5.59565	5.62495	24.8494	93.1868
CB4853	25	5.25199	5.31517	5.28358	21.9246	77.2296
CB4853	25	5.11456	4.66712	4.89084	18.7477	61.2561
CB4853	25	5.48464	5.30794	5.39629	22.8646	82.2781
CB4853	25	4.0145	4.24892	4.13171	13.3968	36.9307
CB4853	25	3.6611	4.06838	3.86474	11.6983	30.2245
CB4853	25	5.20844	4.57811	4.89328	18.7277	61.3476
CB4853	25	4.75038	5.36241	5.0564	20.0068	67.6896
CB4853	26	6.47501	6.08648	6.28075	30.9526	129.728
CB4853	26	6.07615	5.77619	5.92617	27.5651	108.973
CB4853	26	6.35131	5.31798	5.83464	26.5277	104.002
CB4853	26	6.66087	5.7595	6.21019	30.1305	125.404
CB4853	26	5.5462	5.32698	5.43659	23.2042	84.1352
CB4853	26	7.36973	5.87184	6.62079	33.9873	151.959
CB4853	26	4.734	4.52807	4.63103	16.8357	52.0034
CB4853	26	5.7384	6.41124	6.07482	28.895	117.381
CB4853	26	5.26395	4.86921	5.06658	20.1308	68.0994
CB4853	26	4.13806	4.15326	4.14566	13.4982	37.3061
CB4853	26	5.14954	4.98037	5.06496	20.1428	68.034
CB4853	26	6.18051	5.87184	6.02618	28.5029	114.584
CB4853	26	4.04565	4.32347	4.18456	13.7376	38.3661
CB4853	26	4.34015	4.35801	4.34908	14.8553	43.0715
CB4853	26	6.31765	5.01521	5.66643	24.8848	95.2637
CB4853	26	4.46238	4.04934	4.25586	14.1919	40.3608
CB4853	26	4.17762	4.59066	4.38414	15.0624	44.1216
CB4853	26	5.19634	5.06127	5.1288	20.656	70.6393
CB4853	26	6.5258	5.63964	6.08272	28.9051	117.84
CB4853	26	6.41803	5.65425	6.03614	28.5015	115.154
CB4853	27	5.15146	4.8791	5.01528	19.7406	66.0519
CB4853	27	5.64731	5.01034	5.32883	22.2228	79.2307
CB4853	27	5.09182	4.87113	4.98148	19.4802	64.7252
CB4853	27	5.55048	5.10422	5.32735	22.251	79.1648
CB4853	27	6.23189	5.35872	5.7953	26.2283	101.912
CB4853	27	5.43504	5.26852	5.35178	22.4896	80.259
CB4853	27	5.713	5.54708	5.63004	24.8897	93.4402
CB4853	27	6.17727	5.89576	6.03651	28.6039	115.175
CB4853	27	5.23073	4.9324	5.08156	20.2633	68.7054
CB4853	27	7.05634	5.78888	6.42261	32.0822	138.718
CB4853	27	5.21951	5.25657	5.23804	21.5488	75.2498
CB4853	27	5.68835	5.37584	5.5321	24.0172	88.6478
CB4853	27	5.5059	5.68584	5.59587	24.5874	91.749
CB4853	27	5.06614	4.67849	4.87231	18.6154	60.5626
CB4853	27	4.53663	4.96472	4.75068	17.6896	56.139
CB4853	27	5.29967	5.19353	5.2466	21.6173	75.6194
CB4853	27	5.64731	5.45895	5.55313	24.2126	89.6629
CB4853	27	5.90476	6.12767	6.01621	28.4176	114.017
CB4853	27	5.50147	5.5084	5.50494	23.8009	87.3485
CB4853	27	5.29052	5.15235	5.22143	21.4088	74.5363
CB4853	28	6.20709	5.24919	5.72814	25.59	98.4098
CB4853	28	5.17951	4.84633	5.01292	19.7148	65.9586
CB4853	28	5.08046	4.7647	4.92258	19.012	62.4563
CB4853	28	4.9138	5.26026	5.08703	20.3008	68.9272
CB4853	28	4.66299	4.20419	4.43359	15.397	45.6316
CB4853	28	5.23073	5.02968	5.1302	20.663	70.6973
CB4853	28	5.59565	6.04264	5.81914	26.5563	103.175
CB4853	28	5.2418	5.07278	5.15729	20.8842	71.8231
CB4853	28	5.38042	5.06127	5.22084	21.3878	74.511
CB4853	28	5.42795	5.63964	5.5338	24.0424	88.7295
CB4853	28	4.98908	5.23811	5.1136	20.5251	70.0129
CB4853	28	5.33702	5.43504	5.38603	22.782	81.8097
CB4853	28	4.98037	5.46619	5.22328	21.3814	74.6154
CB4853	28	3.93656	3.93656	3.93656	12.1709	31.941
CB4853	28	5.32255	5.4439	5.38322	22.7572	81.6819
CB4853	28	5.82638	5.02776	5.42707	23.0071	83.694
CB4853	28	4.46238	4.15326	4.30782	14.5561	41.8573
CB4853	28	4.94229	5.57144	5.25686	21.6264	76.0639
CB4853	28	5.59476	5.35429	5.47453	23.5274	85.9089
CB4853	28	4.52703	4.73296	4.63	16.8282	51.9686
CB4854	29	4.98037	5.50147	5.24092	21.5194	75.3739
CB4854	29	6.43309	6.00647	6.21978	30.3479	125.986
CB4854	29	6.04264	5.70193	5.87229	27.0607	106.028
CB4854	29	6.61422	6.28769	6.45095	32.6632	140.563
CB4854	29	6.04175	5.95052	5.99614	28.2363	112.879
CB4854	29	5.60347	6.04264	5.82305	26.5934	103.384
CB4854	29	4.70949	4.97343	4.84146	18.3959	59.4194
CB4854	29	4.04565	4.20419	4.12492	13.3586	36.7489
CB4854	29	4.19031	4.40658	4.29845	14.5023	41.5846
CB4854	29	6.00647	6.01282	6.00965	28.3653	113.644
CB4854	29	5.92115	5.65425	5.7877	26.2949	101.512
CB4854	29	5.99584	5.21686	5.60635	24.5668	92.2655
CB4854	29	5.24919	5.35149	5.30034	22.0626	77.9666
CB4854	29	5.32255	5.78962	5.55609	24.2025	89.806
CB4854	29	5.79213	5.76615	5.77914	26.2309	101.062
CB4854	29	5.54	5.67138	5.60569	24.6767	92.2327
CB4854	29	4.75038	5.10614	4.92826	19.0507	62.6729
CB4854	29	5.38042	5.45895	5.41969	23.0683	83.3529
CB4854	29	5.17951	4.97343	5.07647	20.2318	68.499
CB4854	29	5.56184	5.8097	5.68577	25.3783	96.2424
CB4854	30	7.1055	7.07272	7.08911	39.4703	186.541
CB4854	30	5.82889	5.94477	5.88683	27.2151	106.817
CB4854	30	7.05634	6.42704	6.74169	35.6189	160.437
CB4854	30	6.16162	6.2062	6.18391	30.0338	123.819
CB4854	30	6.60536	6.10006	6.35271	31.6461	134.238
CB4854	30	4.70949	4.898	4.80375	18.1168	58.0415
CB4854	30	5.56184	5.59565	5.57875	24.4433	90.9093
CB4854	30	4.0576	4.40111	4.22936	14.0256	39.6116
CB4854	30	5.25657	6.5472	5.90188	27.0301	107.639
CB4854	30	5.45895	5.57483	5.51689	23.9018	87.9189
CB4854	30	5.06614	5.5146	5.29037	21.9423	77.5277
CB4854	30	5.8122	5.67728	5.74474	25.9162	99.2683
CB4854	30	5.3261	5.20475	5.26542	21.772	76.4361
CB4854	30	5.15235	5.55048	5.35141	22.4608	80.2424
CB4854	30	5.44832	5.5059	5.47711	23.5603	86.0306
CB4854	30	4.0145	3.96106	3.98778	12.4892	33.2042
CB4854	30	5.8097	6.00647	5.90808	27.4071	107.979
CB4854	30	5.90639	6.43309	6.16974	29.8422	122.97
CB4854	30	4.99676	4.6097	4.80323	18.0905	58.0228
CB4854	30	5.76703	5.65765	5.71234	25.6258	97.598
CB4854	31	6.1656	6.3612	6.2634	30.8038	128.656
CB4854	31	5.94801	6.22805	6.08803	29.0947	118.149
CB4854	31	5.91303	6.43309	6.17306	29.8758	123.169
CB4854	31	5.35606	5.81383	5.58495	24.4567	91.2127
CB4854	31	5.50147	5.7595	5.63049	24.8859	93.4622
CB4854	31	6.3237	6.4263	6.375	31.917	135.656
CB4854	31	5.70533	5.73249	5.71891	25.687	97.9351
CB4854	31	5.20003	5.81383	5.50693	23.7442	87.4434
CB4854	31	6.17727	6.00647	6.09187	29.1411	118.372
CB4854	31	5.46619	6.4818	5.974	27.8272	111.633
CB4854	31	5.23811	5.87184	5.55498	24.1568	89.7523
CB4854	31	5.7595	5.7384	5.74895	25.9577	99.4865
CB4854	31	4.10986	4.40658	4.25822	14.2239	40.428
CB4854	31	5.5059	5.4873	5.4966	23.7288	86.9521
CB4854	31	5.73338	5.89576	5.81457	26.5485	102.932
CB4854	31	4.89401	5.28137	5.08769	20.3003	68.9542
CB4854	31	5.21125	5.59225	5.40175	22.8886	82.5281
CB4854	31	4.81017	5.15707	4.98362	19.4829	64.8087
CB4854	31	5.80719	5.68584	5.74651	25.9329	99.3601
CB4854	31	5.87184	5.76615	5.819	26.5919	103.167
CB4854	32	6.00883	5.95052	5.97968	28.0825	111.952
CB4854	32	5.56184	5.63624	5.59904	24.6206	91.9052
CB4854	32	6.73246	6.60167	6.66707	34.9074	155.168
CB4854	32	5.63713	5.89576	5.76644	26.1028	100.397
CB4854	32	5.16637	5.84217	5.50427	23.7055	87.3169
CB4854	32	4.40111	4.09333	4.24722	14.1491	40.1156
CB4854	32	5.82889	5.89827	5.86358	27.0022	105.557
CB4854	32	4.22722	4.71658	4.4719	15.6593	46.8246
CB4854	32	5.81973	5.5059	5.66281	25.1664	95.0814
CB4854	32	6.18051	6.06094	6.12073	29.4208	120.063
CB4854	32	5.35429	5.38042	5.36735	22.626	80.9617
CB4854	32	6.23189	6.30141	6.26665	30.8423	128.856
CB4854	32	6.0298	5.57144	5.80062	26.3852	102.193
CB4854	32	5.95776	6.59444	6.2761	30.8568	129.44
CB4854	32	5.7384	6.86635	6.30237	30.9461	131.072
CB4854	32	5.7384	5.7257	5.73205	25.8053	98.6116
CB4854	32	6.0354	6.11423	6.07482	28.9827	117.381
CB4854	32	6.04264	6.30614	6.17439	29.9282	123.248
CB4854	32	6.2031	6.22421	6.21365	30.3237	125.615
CB4854	32	5.58531	5.70621	5.64576	25.0314	94.2252
CB4854	33	4.97934	5.63964	5.30949	22.0553	78.3712
CB4854	33	3.96711	4.05288	4.01	12.6278	33.7622
CB4854	33	5.54708	5.6293	5.58819	24.525	91.3719
CB4854	33	6.63976	6.60536	6.62256	34.446	152.081
CB4854	33	4.94125	5.67138	5.30631	22.0098	78.2308
CB4854	33	3.56736	3.85817	3.71277	10.8098	26.7973
CB4854	33	5.35429	6.08648	5.72039	25.5952	98.0109
CB4854	33	5.35429	5.94152	5.6479	24.9856	94.3324
CB4854	33	5.62325	5.29052	5.45689	23.3655	85.0811
CB4854	33	4.12049	3.96106	4.04078	12.8189	34.5456
CB4854	33	5.57483	5.19353	5.38418	22.7397	81.7256
CB4854	33	6.1687	6.04899	6.10885	29.3067	119.365
CB4854	33	3.86954	4.36805	4.11879	13.2751	36.5855
CB4854	33	5.77619	6.01046	5.89332	27.2671	107.171
CB4854	33	5.7257	6.27691	6.0013	28.227	113.171
CB4854	33	5.46884	5.72157	5.5952	24.5754	91.7163
CB4854	33	6.25595	6.57894	6.41744	32.325	138.384
CB4854	33	5.63713	6.14435	5.89074	27.2034	107.031
CB4854	33	5.77619	6.12767	5.95193	27.7988	110.401
CB4854	33	6.3237	6.3612	6.34245	31.5937	133.589
CB4854	34	5.35149	6.17727	5.76438	25.9633	100.29
CB4854	34	4.24552	4.53663	4.39108	15.1271	44.3314
CB4854	34	6.21565	5.88911	6.05238	28.7492	116.085
CB4854	34	4.64218	5.02776	4.83497	18.331	59.1806
CB4854	34	5.3723	5.24092	5.30661	22.1135	78.2438
CB4854	34	4.76972	5.13257	4.95114	19.2273	63.5499
CB4854	34	4.83128	4.53663	4.68395	17.2141	53.8067
CB4854	34	5.63964	5.54708	5.59336	24.57	91.6256
CB4854	34	5.61041	5.68835	5.64938	25.0652	94.4063
CB4854	34	5.57483	5.98374	5.77929	26.1996	101.07
CB4854	34	5.40463	5.55048	5.47755	23.5606	86.0515
CB4854	34	6.38172	6.6405	6.51111	33.2834	144.532
CB4854	34	6.1687	5.82962	5.99916	28.2439	113.05
CB4854	34	5.35149	5.94801	5.64975	24.9998	94.4249
CB4854	34	5.28594	5.57144	5.42869	23.1302	83.7691
CB4854	34	6.30141	6.3054	6.30341	31.2062	131.137
CB4854	34	5.6516	6.138	5.8948	27.2451	107.252
CB4854	34	5.47755	5.77368	5.62561	24.8387	93.2199
CB4854	34	6.23189	6.5472	6.38954	32.0453	136.587
CB4854	34	5.58531	5.57055	5.57793	24.4363	90.8696
CB4854	35	5.46619	5.78962	5.6279	24.8556	93.3337
CB4854	35	5.99584	6.18051	6.08818	29.1048	118.157
CB4854	35	5.57144	5.85369	5.71256	25.6145	97.6093
CB4854	35	6.00647	5.7384	5.87243	27.0707	106.036
CB4854	35	6.25521	6.16324	6.20923	30.279	125.346
CB4854	35	5.51903	5.29052	5.40478	22.9325	82.6669
CB4854	35	6.04899	6.5472	6.29809	31.1048	130.805
CB4854	35	5.92528	5.94152	5.9334	27.6501	109.373
CB4854	35	5.55668	5.58531	5.571	24.3754	90.5309
CB4854	35	5.21582	5.02968	5.12275	20.6041	70.3895
CB4854	35	5.92528	6.22421	6.07475	28.9656	117.377
CB4854	35	6.04264	6.28769	6.16516	29.8406	122.696
CB4854	35	4.82626	5.04311	4.93468	19.1161	62.9182
CB4854	35	4.54932	4.34015	4.44474	15.5075	45.9766
CB4854	35	5.14954	5.36964	5.25959	21.7172	76.1825
CB4854	35	5.54088	6.27986	5.91037	27.3287	108.104
CB4854	35	5.43504	5.87184	5.65344	25.065	94.61
CB4854	35	6.18199	7.2385	6.71025	35.1453	158.203
CB4854	35	5.94565	5.94565	5.94565	27.7644	110.052
CB4854	35	5.7257	6.00647	5.86609	27.0108	105.692
CB4856	36	5.42338	5.46619	5.44478	23.2833	84.5162
CB4856	36	4.51522	5.10422	4.80972	18.1008	58.2585
CB4856	36	5.62325	5.54088	5.58207	24.4713	91.0717
CB4856	36	5.3723	6.14907	5.76069	25.9454	100.097
CB4856	36	3.79883	3.90689	3.85286	11.6566	29.9466
CB4856	36	5.29967	5.29052	5.2951	22.021	77.7356
CB4856	36	5.29701	4.97639	5.1367	20.7031	70.9661
CB4856	36	5.20844	6.1656	5.68702	25.2216	96.3061
CB4856	36	6.28916	5.53306	5.91111	27.3305	108.145
CB4856	36	6.09283	6.07054	6.08168	29.0493	117.78
CB4856	36	6.26451	5.27502	5.76976	25.9538	100.571
CB4856	36	5.0843	5.10422	5.09426	20.3822	69.2216
CB4856	36	5.29967	5.1212	5.21044	21.3162	74.0663
CB4856	36	6.25905	5.61041	5.93473	27.5799	109.446
CB4856	36	6.10242	5.79626	5.94934	27.7805	110.257
CB4856	36	5.22335	5.19634	5.20985	21.3175	74.0411
CB4856	36	5.29052	5.10614	5.19833	21.2169	73.5513
CB4856	36	5.04311	5.1646	5.10385	20.4562	69.6135
CB4856	36	4.70432	5.10614	4.90523	18.866	61.7985
CB4856	36	5.27502	5.81383	5.54442	24.0866	89.2417
CB4856	37	5.45807	5.59476	5.52641	23.9834	88.3749
CB4856	37	5.70621	5.01801	5.36211	22.489	80.7248
CB4856	37	5.68835	5.13729	5.41282	22.9515	83.0366
CB4856	37	5.5146	5.06614	5.29037	21.9423	77.5277
CB4856	37	4.734	5.19722	4.96561	19.3236	64.1086
CB4856	37	5.3912	5.56701	5.4791	23.572	86.1245
CB4856	37	5.39474	5.88262	5.63868	24.9248	93.8708
CB4856	37	5.239	5.29967	5.26934	21.8066	76.6066
CB4856	37	5.7536	5.92115	5.83737	26.7569	104.148
CB4856	37	4.73296	4.98908	4.86102	18.5457	60.1425
CB4856	37	5.42707	5.8097	5.61838	24.7633	92.8607
CB4856	37	4.7737	5.19722	4.98546	19.4857	64.8807
CB4856	37	4.53338	4.39447	4.46393	15.6466	46.5747
CB4856	37	5.21686	5.16637	5.19161	21.1682	73.2666
CB4856	37	5.56878	5.10703	5.3379	22.3367	79.6363
CB4856	37	4.11104	4.24552	4.17828	13.708	38.1937
CB4856	37	5.54088	5.4563	5.49859	23.7447	87.0467
CB4856	37	5.63624	5.87347	5.75485	26	99.7934
CB4856	37	5.46884	5.98374	5.72629	25.7015	98.3148
CB4856	37	5.36964	5.13729	5.25347	21.6655	75.9166
CB4856	38	5.65425	5.11751	5.38588	22.726	81.8029
CB4856	38	5.02968	5.01521	5.02244	19.8116	66.3351
CB4856	38	6.07379	5.95776	6.01577	28.4205	113.992
CB4856	38	5.92528	5.91214	5.91871	27.5134	108.563
CB4856	38	5.67728	5.28594	5.48161	23.5696	86.2429
CB4856	38	5.1184	4.75643	4.93741	19.1208	63.0227
CB4856	38	4.93638	5.54088	5.23863	21.4821	75.2752
CB4856	38	4.47315	4.7647	4.61893	16.7394	51.5967
CB4856	38	4.92944	5.08046	5.00495	19.6694	65.6444
CB4856	38	3.92165	3.87825	3.89995	11.9452	31.0581
CB4856	38	5.31798	4.7402	5.02909	19.7985	66.5987
CB4856	38	4.88604	4.79806	4.84205	18.4125	59.4411
CB4856	38	4.72484	4.73208	4.72846	17.5602	55.3551
CB4856	38	6.25211	5.45895	5.85553	26.8056	105.123
CB4856	38	5.01801	5.02289	5.02045	19.7959	66.2562
CB4856	38	5.16637	4.92944	5.04791	20.002	67.3492
CB4856	38	4.51522	4.71259	4.61391	16.712	51.4287
CB4856	38	5.35429	5.78962	5.57195	24.3468	90.5777
CB4856	38	5.44832	5.45895	5.45364	23.3594	84.9293
CB4856	38	4.63273	5.13729	4.88501	18.6922	61.0372
CB4856	39	6.57894	6.36341	6.47118	32.8803	141.889
CB4856	39	6.06419	6.11423	6.08921	29.1209	118.218
CB4856	39	5.67728	6.0298	5.85354	26.8864	105.016
CB4856	39	5.23162	5.68835	5.45999	23.3729	85.2262
CB4856	39	5.32698	5.15988	5.24343	21.5879	75.4822
CB4856	39	5.7384	6.01282	5.87561	27.0993	106.208
CB4856	39	5.5059	6.138	5.82195	26.5427	103.325
CB4856	39	5.94565	5.97813	5.96189	27.9161	110.956
CB4856	39	5.17951	5.15604	5.16777	20.9746	72.2619
CB4856	39	5.51992	5.8122	5.66606	25.1979	95.2451
CB4856	39	4.63273	4.88604	4.75939	17.778	56.4484
CB4856	39	5.5462	5.49172	5.51896	23.9218	88.0177
CB4856	39	5.27502	5.23811	5.25657	21.7015	76.051
CB4856	39	5.85206	6.31219	6.08213	29.0121	117.805
CB4856	39	5.95776	5.94801	5.95289	27.832	110.454
CB4856	39	5.37776	4.88604	5.1319	20.6371	70.7675
CB4856	39	5.6516	5.5059	5.57875	24.4393	90.9093
CB4856	39	5.67138	5.7257	5.69854	25.5039	96.8922
CB4856	39	5.44832	5.15604	5.30218	22.0632	78.0481
CB4856	39	5.14954	5.01137	5.08046	20.2682	68.6605
CB4856	40	4.68779	4.3713	4.52954	16.0942	48.6588
CB4856	40	5.61735	5.54088	5.57911	24.4456	90.9273
CB4856	40	5.34706	5.23811	5.29259	21.9978	77.6251
CB4856	40	5.34794	5.7595	5.55372	24.1914	89.6915
CB4856	40	5.4439	5.43504	5.43947	23.2382	84.2689
CB4856	40	5.37053	5.21686	5.29369	22.0047	77.6739
CB4856	40	5.90801	5.13729	5.52265	23.8377	88.1944
CB4856	40	6.55532	6.2992	6.42726	32.4317	139.02
CB4856	40	5.85369	6.04264	5.94816	27.7809	110.191
CB4856	40	5.0843	5.50147	5.29288	21.9684	77.6381
CB4856	40	6.33596	5.98374	6.15985	29.7766	122.379
CB4856	40	6.14435	6.37862	6.26148	30.7817	128.538
CB4856	40	5.5462	5.81383	5.68001	25.3249	95.9503
CB4856	40	5.43415	5.78888	5.61152	24.7068	92.5208
CB4856	40	4.5505	4.5505	4.5505	16.2633	49.3375
CB4856	40	5.33436	5.27502	5.30469	22.1002	78.159
CB4856	40	5.51903	5.97813	5.74858	25.913	99.4674
CB4856	40	5.15604	5.94565	5.55085	24.0772	89.5521
CB4856	40	4.70432	5.22335	4.96384	19.2991	64.04
CB4856	40	5.19353	5.65425	5.42389	23.0636	83.5472
CB4856	41	5.57055	5.36964	5.4701	23.4927	85.7006
CB4856	41	6.00883	5.54708	5.77796	26.1785	101
CB4856	41	5.40463	5.68835	5.54649	24.1458	89.3415
CB4856	41	5.11751	5.32255	5.22003	21.3928	74.4763
CB4856	41	5.67905	5.06614	5.3726	22.5966	81.1991
CB4856	41	6.57894	5.94477	6.26185	30.7171	128.56
CB4856	41	4.92944	4.99971	4.96458	19.3568	64.0686
CB4856	41	5.50147	4.95306	5.22726	21.4014	74.7863
CB4856	41	5.08046	4.83128	4.95587	19.2777	63.732
CB4856	41	4.13924	4.22604	4.18264	13.7386	38.3133
CB4856	41	5.35149	5.63359	5.49254	23.6782	86.7596
CB4856	41	5.58266	5.15604	5.36935	22.6072	81.0519
CB4856	41	5.32255	5.17951	5.25103	21.652	75.811
CB4856	41	5.41983	4.94229	5.18106	21.038	72.8206
CB4856	41	5.36964	4.71658	5.04311	19.8913	67.1574
CB4856	41	5.39474	5.76703	5.58089	24.435	91.014
CB4856	41	4.98908	5.02776	5.00842	19.7008	65.781
CB4856	41	5.7384	5.43415	5.58627	24.4913	91.2778
CB4856	41	5.71551	5.69514	5.70533	25.5652	97.239
CB4856	41	5.68835	5.10703	5.39769	22.8163	82.3422
CB4856	42	5.47239	5.46884	5.47061	23.5051	85.7249
CB4856	42	6.02492	5.72157	5.87325	27.0742	106.08
CB4856	42	6.39678	5.68584	6.04131	28.5658	115.449
CB4856	42	5.82298	5.38396	5.60347	24.6228	92.1234
CB4856	42	5.32698	5.63964	5.48331	23.5951	86.3231
CB4856	42	4.72484	4.55892	4.64188	16.9176	52.3698
CB4856	42	5.63359	5.97813	5.80586	26.4509	102.47
CB4856	42	4.93638	5.26395	5.10016	20.4085	69.4626
CB4856	42	5.29967	5.35149	5.32558	22.2748	79.0859
CB4856	42	5.17774	4.97343	5.07559	20.2249	68.4632
CB4856	42	4.53131	4.76972	4.65052	16.9749	52.6626
CB4856	42	6.6529	5.65425	6.15357	29.5444	122.006
CB4856	42	5.06038	5.15235	5.10636	20.4776	69.7162
CB4856	42	5.42972	5.49172	5.46072	23.4194	85.2608
CB4856	42	5.35429	5.3723	5.3633	22.5919	80.7781
CB4856	42	5.67817	5.39474	5.53645	24.0585	88.8573
CB4856	42	5.41629	5.06614	5.24121	21.5511	75.3866
CB4856	42	5.27502	5.23811	5.25657	21.7015	76.051
CB4856	42	5.186	5.20475	5.19538	21.1994	73.4261
CB4856	42	5.70533	5.46619	5.58576	24.4937	91.2525
CB4857	43	5.86933	6.2992	6.08427	29.0378	117.93
CB4857	43	4.18116	4.57914	4.38015	15.0373	44.0014
CB4857	43	5.61041	5.3261	5.46825	23.4689	85.6139
CB4857	43	4.00727	4.15326	4.08026	13.0716	35.5683
CB4857	43	6.52358	6.50498	6.51428	33.329	144.743
CB4857	43	5.90801	5.50147	5.70474	25.5276	97.2088
CB4857	43	6.22805	5.7316	5.97983	28.0361	111.96
CB4857	43	5.48995	5.55048	5.52021	23.9325	88.0778
CB4857	43	5.239	5.39474	5.31687	22.1977	78.6985
CB4857	43	4.70432	4.48186	4.59309	16.5594	50.7358
CB4857	43	7.0556	6.85366	6.95463	37.9792	176.125
CB4857	43	6.50498	6.56491	6.53495	33.5401	146.125
CB4857	43	4.55892	4.64218	4.60055	16.6216	50.9832
CB4857	43	6.4421	5.98699	6.21454	30.2918	125.668
CB4857	43	6.11423	6.73246	6.42335	32.33	138.766
CB4857	43	4.76057	4.68779	4.72418	17.5274	55.2049
CB4857	43	4.05288	4.23283	4.14285	13.4736	37.2304
CB4857	43	5.85206	5.94565	5.89886	27.3274	107.474
CB4857	43	5.92115	5.87184	5.8965	27.3068	107.345
CB4857	43	5.88262	5.55402	5.71832	25.6607	97.9048
CB4857	44	4.44599	4.36805	4.40702	15.2527	44.816
CB4857	44	4.85519	4.94229	4.89874	18.8462	61.5533
CB4857	44	4.95306	5.0499	5.00148	19.6447	65.508
CB4857	44	5.19634	4.84633	5.02134	19.7788	66.2913
CB4857	44	4.36805	5.41983	4.89394	18.5936	61.3726
CB4857	44	4.94524	4.7991	4.87217	18.6396	60.5571
CB4857	44	4.66816	4.99676	4.83246	18.3199	59.0885
CB4857	44	5.11751	5.82638	5.47194	23.4179	85.7874
CB4857	44	5.20475	5.21582	5.21029	21.3213	74.06
CB4857	44	6.27691	5.61041	5.94366	27.6586	109.941
CB4857	44	6.33596	5.94152	6.13874	29.5665	121.126
CB4857	44	6.08648	6.22495	6.15571	29.7572	122.133
CB4857	44	4.26929	5.19634	4.73281	17.4238	55.5082
CB4857	44	5.93502	5.65425	5.79464	26.3565	101.877
CB4857	44	6.05784	6.01607	6.03695	28.6234	115.2
CB4857	44	6.49007	6.50793	6.499	33.1728	143.727
CB4857	44	4.98037	5.42972	5.20505	21.2388	73.8368
CB4857	44	4.63273	4.98037	4.80655	18.1213	58.1432
CB4857	44	5.1646	5.35429	5.25945	21.7184	76.176
CB4857	44	5.63359	5.7384	5.68599	25.3901	96.2536
CB4857	45	5.54265	5.43504	5.48885	23.6597	86.5848
CB4857	45	5.26395	5.57395	5.41895	23.0443	83.3189
CB4857	45	5.15146	5.41629	5.28388	21.914	77.2425
CB4857	45	5.51106	5.99584	5.75345	25.9523	99.7204
CB4857	45	5.7384	6.21255	5.97547	27.9995	111.716
CB4857	45	5.38396	5.6293	5.50663	23.8038	87.4293
CB4857	45	4.74935	4.40658	4.57796	16.4371	50.236
CB4857	45	4.75038	4.51626	4.63332	16.8499	52.0805
CB4857	45	5.73338	5.46884	5.60111	24.6261	92.007
CB4857	45	5.19634	5.63359	5.41496	22.9918	83.1352
CB4857	45	5.41275	5.01137	5.21206	21.3042	74.1356
CB4857	45	5.11751	5.56878	5.34315	22.3825	79.8711
CB4857	45	5.28594	5.78637	5.53616	24.0225	88.8431
CB4857	45	4.67539	4.94524	4.81031	18.1591	58.2799
CB4857	45	5.34706	5.04311	5.19508	21.1789	73.4135
CB4857	45	5.41629	5.13449	5.27539	21.8418	76.8709
CB4857	45	5.06614	5.46619	5.26616	21.7496	76.4683
CB4857	45	5.73249	5.76703	5.74976	25.9648	99.5287
CB4857	45	5.55668	5.44832	5.5025	23.7776	87.2326
CB4857	45	5.42795	5.4873	5.45762	23.3929	85.1156
CB4857	46	5.24919	5.28594	5.26756	21.7924	76.5294
CB4857	46	5.28594	5.15604	5.22099	21.4057	74.5173
CB4857	46	6.06094	5.63359	5.84726	26.8173	104.678
CB4857	46	6.10479	6.34511	6.22495	30.4228	126.301
CB4857	46	4.94524	4.93638	4.94081	19.1728	63.1529
CB4857	46	4.48939	5.24092	4.86515	18.4793	60.296
CB4857	46	5.63964	6.0354	5.83752	26.733	104.156
CB4857	46	5.87184	5.11751	5.49468	23.6006	86.861
CB4857	46	4.64528	5.29598	4.97063	19.3218	64.3032
CB4857	46	5.50147	5.84217	5.67182	25.2431	95.5357
CB4857	46	6.25063	5.59565	5.92314	27.4704	108.806
CB4857	46	5.57144	5.44832	5.50988	23.8408	87.5841
CB4857	46	5.67817	5.42072	5.54944	24.1744	89.4843
CB4857	46	5.68835	5.34794	5.51815	23.8926	87.9789
CB4857	46	4.13806	4.54932	4.34369	14.7854	42.9117
CB4857	46	5.3261	5.65425	5.49017	23.6523	86.6477
CB4857	46	5.17951	5.4439	5.3117	22.1456	78.4693
CB4857	46	5.07278	5.37776	5.22527	21.4258	74.7008
CB4857	46	5.08046	4.78286	4.93166	19.0845	62.8025
CB4857	46	5.57144	5.5059	5.53867	24.0927	88.964
CB4857	47	6.70368	5.53306	6.11837	29.1318	119.924
CB4857	47	4.38901	4.74935	4.56918	16.3716	49.9474
CB4857	47	5.41363	5.29967	5.35665	22.5334	80.4783
CB4857	47	5.68835	5.01226	5.3503	22.3929	80.1926
CB4857	47	4.31668	4.7647	4.54069	16.1538	49.0189
CB4857	47	5.37584	5.82298	5.59941	24.5857	91.9234
CB4857	47	4.82626	5.33436	5.08031	20.2201	68.6545
CB4857	47	5.31517	6.22421	5.76969	25.9831	100.567
CB4857	47	6.07615	5.85369	5.96492	27.9349	111.125
CB4857	47	5.38396	5.9644	5.67418	25.2208	95.6551
CB4857	47	4.79806	5.35149	5.07477	20.1665	68.4303
CB4857	47	5.24638	6.09283	5.6696	25.1055	95.4239
CB4857	47	5.47755	5.85369	5.66562	25.1829	95.2228
CB4857	47	5.67817	6.08722	5.88269	27.1467	106.593
CB4857	47	5.72157	5.23811	5.47984	23.5386	86.1593
CB4857	47	4.38458	4.26368	4.32413	14.6826	42.3346
CB4857	47	5.43504	4.48836	4.9617	19.1593	63.9572
CB4857	47	5.01905	5.47239	5.24572	21.5719	75.5811
CB4857	47	5.44832	5.62325	5.53579	24.0625	88.8254
CB4857	47	4.26368	4.44717	4.35543	14.8922	43.2604
CB4857	48	6.5782	6.12147	6.34983	31.6266	134.056
CB4857	48	5.77619	6.07379	5.92499	27.5544	108.908
CB4857	48	4.36805	4.49264	4.43034	15.4127	45.5314
CB4857	48	5.64731	5.50147	5.57439	24.4012	90.6966
CB4857	48	5.41363	5.28594	5.34979	22.4751	80.1693
CB4857	48	5.51549	6.11822	5.81685	26.5032	103.054
CB4857	48	5.57483	6.17727	5.87605	27.0469	106.232
CB4857	48	4.96472	4.67849	4.82161	18.2428	58.6913
CB4857	48	3.96711	3.72546	3.84629	11.6077	29.7937
CB4857	48	6.2992	5.50147	5.90033	27.2178	107.554
CB4857	48	5.63713	6.17727	5.9072	27.3492	107.93
CB4857	48	4.88604	5.54088	5.21346	21.2631	74.1954
CB4857	48	4.70019	5.11456	4.90737	18.8805	61.8794
CB4857	48	5.66532	5.90476	5.78504	26.2734	101.372
CB4857	48	5.5059	6.0633	5.7846	26.2197	101.349
CB4857	48	4.76972	4.9138	4.84176	18.4077	59.4303
CB4857	48	5.95776	5.93502	5.94639	27.7712	110.093
CB4857	48	5.55668	5.97813	5.7674	26.0898	100.448
CB4857	48	6.00647	5.81383	5.91015	27.4266	108.092
CB4857	48	5.05846	5.5084	5.28343	21.8844	77.2231
CB4857	49	4.96768	5.45895	5.21331	21.2987	74.1891
CB4857	49	6.84229	6.39678	6.61953	34.3758	151.873
CB4857	49	6.00647	5.5896	5.79803	26.3688	102.057
CB4857	49	5.0843	5.06614	5.07522	20.2301	68.4483
CB4857	49	5.5084	5.81383	5.66112	25.1523	94.9959
CB4857	49	4.94524	5.08046	5.01285	19.7324	65.9557
CB4857	49	5.46619	6.03216	5.74917	25.8968	99.498
CB4857	49	5.32255	5.7257	5.52413	23.9353	88.2652
CB4857	49	4.40111	4.45042	4.42577	15.3834	45.3904
CB4857	49	4.88604	4.898	4.89202	18.796	61.3005
CB4857	49	5.26026	5.63624	5.44825	23.2856	84.6778
CB4857	49	6.10877	4.92162	5.5152	23.613	87.8378
CB4857	49	4.11104	4.31328	4.21216	13.9267	39.1304
CB4857	49	4.35698	4.86124	4.60911	16.635	51.2684
CB4857	49	4.38901	4.38901	4.38901	15.1294	44.2688
CB4857	49	5.64731	4.94125	5.29428	21.9164	77.6998
CB4857	49	5.47755	5.5462	5.51187	23.8601	87.6792
CB4857	49	4.13924	4.35919	4.24921	14.1715	40.1721
CB4857	49	5.7257	5.7595	5.7426	25.9002	99.1573
CB4857	49	5.3723	5.01137	5.19184	21.145	73.2759
CB4858	50	4.23283	3.47938	3.8561	11.567	30.0224
CB4858	50	4.62638	4.23977	4.43307	15.4054	45.6156
CB4858	50	5.67905	4.6097	5.14438	20.5607	71.2848
CB4858	50	5.63713	5.37776	5.50745	23.8095	87.468
CB4858	50	5.25657	5.26852	5.26255	21.7511	76.3108
CB4858	50	4.97343	4.70432	4.83888	18.3757	59.3243
CB4858	50	5.713	5.30513	5.50907	23.804	87.5454
CB4858	50	5.28875	5.23073	5.25974	21.7273	76.1889
CB4858	50	5.22335	5.17951	5.20143	21.2485	73.683
CB4858	50	5.57144	5.23073	5.40109	22.8886	82.4977
CB4858	50	5.42972	5.02968	5.2297	21.449	74.8909
CB4858	50	5.82298	5.0843	5.45364	23.2523	84.9293
CB4858	50	4.80515	4.63273	4.71894	17.4837	55.0214
CB4858	50	5.15988	5.29967	5.22977	21.4772	74.8941
CB4858	50	5.81383	5.92115	5.86749	27.037	105.768
CB4858	50	4.69192	4.49795	4.59494	16.5751	50.7969
CB4858	50	5.4439	5.22985	5.33687	22.3609	79.5901
CB4858	50	5.43415	5.45895	5.44655	23.2987	84.5987
CB4858	50	5.70193	5.31429	5.50811	23.7989	87.4997
CB4858	50	5.26852	4.86124	5.06488	20.1153	68.031
CB4858	51	5.13257	4.86124	4.9969	19.5962	65.3284
CB4858	51	5.42338	4.92944	5.17641	20.997	72.6247
CB4858	51	5.0499	4.53663	4.79326	17.9931	57.6624
CB4858	51	5.36241	5.21686	5.28963	21.9715	77.4953
CB4858	51	4.70949	4.82316	4.76632	17.84	56.6956
CB4858	51	5.65425	5.34706	5.50065	23.7454	87.1449
CB4858	51	5.51106	5.56701	5.53904	24.0961	88.9818
CB4858	51	4.8422	5.36241	5.1023	20.3935	69.5501
CB4858	51	5.22424	5.27502	5.24963	21.644	75.7503
CB4858	51	5.08046	5.94565	5.51305	23.7242	87.7355
CB4858	51	5.3261	5.33436	5.33023	22.3142	79.2932
CB4858	51	4.96768	4.48836	4.72802	17.5118	55.3395
CB4858	51	5.4439	4.88604	5.16497	20.8909	72.1443
CB4858	51	5.15988	5.0843	5.12209	20.6044	70.3622
CB4858	51	4.75643	4.82626	4.79135	18.0294	57.5932
CB4858	51	5.01137	4.6379	4.82463	18.2544	58.8019
CB4858	51	4.77784	4.38458	4.58121	16.4532	50.343
CB4858	51	5.59476	5.5059	5.55033	24.1935	89.5271
CB4858	51	5.21951	4.99676	5.10814	20.4837	69.7888
CB4858	51	5.59476	5.55668	5.57572	24.4167	90.7614
CB4858	52	4.92944	5.45895	5.1942	21.1347	73.376
CB4858	52	5.54265	5.6516	5.59712	24.6025	91.8107
CB4858	52	5.29967	4.98908	5.14438	20.7663	71.2848
CB4858	52	5.23162	4.36805	4.79983	17.9479	57.8998
CB4858	52	5.10319	5.51903	5.31111	22.1205	78.4431
CB4858	52	5.28594	5.63624	5.46109	23.3993	85.2781
CB4858	52	5.3912	5.62325	5.50722	23.8102	87.4574
CB4858	52	4.72381	4.82522	4.77452	17.9019	56.9885
CB4858	52	5.38396	6.12767	5.75581	25.9112	99.8433
CB4858	52	4.72588	5.43504	5.08046	20.1732	68.6605
CB4858	52	4.78286	5.04119	4.91202	18.937	62.0555
CB4858	52	5.19353	5.64731	5.42042	23.0353	83.387
CB4858	52	5.68068	6.07615	5.87841	27.1093	106.36
CB4858	52	5.91214	5.42338	5.66776	25.1828	95.3307
CB4858	52	4.80515	4.59494	4.70004	17.3411	54.3631
CB4858	52	6.14036	5.40463	5.7725	26.0645	100.714
CB4858	52	5.81973	5.70872	5.76423	26.0935	100.282
CB4858	52	5.21582	4.88604	5.05093	20.0157	67.4704
CB4858	52	5.43504	4.5505	4.99277	19.4246	65.1664
CB4858	52	6.13003	5.65765	5.89384	27.2388	107.2
CB4858	53	6.09283	5.23811	5.66547	25.0659	95.2153
CB4858	53	5.54088	6.00647	5.77368	26.1389	100.776
CB4858	53	4.0576	3.56736	3.81248	11.3686	29.015
CB4858	53	5.8097	6.1969	6.0033	28.276	113.284
CB4858	53	5.70799	5.83627	5.77213	26.1642	100.695
CB4858	53	5.51903	5.05846	5.28875	21.9266	77.4564
CB4858	53	5.78962	6.26215	6.02588	28.475	114.567
CB4858	53	5.06038	5.63624	5.34831	22.4008	80.103
CB4858	53	5.8097	4.80618	5.30794	21.9302	78.3026
CB4858	53	5.2418	5.43504	5.33842	22.3755	79.6594
CB4858	53	5.5146	5.41629	5.46545	23.4588	85.4822
CB4858	53	5.6516	5.0499	5.35075	22.4153	80.2125
CB4858	53	5.98374	5.90565	5.94469	27.7543	109.999
CB4858	53	5.78888	5.5983	5.69359	25.4531	96.6402
CB4858	53	5.8097	4.5077	5.1587	20.5683	71.8817
CB4858	53	5.28594	5.68835	5.48715	23.6156	86.5045
CB4858	53	5.5146	6.35352	5.93406	27.5181	109.41
CB4858	53	5.05359	5.1212	5.0874	20.3265	68.9422
CB4858	53	5.38396	5.4439	5.41393	23.0198	83.0876
CB4858	53	5.68835	4.89505	5.2917	21.8692	77.5862
CB4858	54	5.78888	6.27986	6.03437	28.5519	115.052
CB4858	54	4.72484	4.96472	4.84478	18.4235	59.5418
CB4858	54	4.45042	3.77196	4.11119	13.1843	36.3832
CB4858	54	5.95776	5.45895	5.70835	25.5436	97.3938
CB4858	54	5.72659	5.3289	5.52774	23.9675	88.4387
CB4858	54	6.736	6.51679	6.6264	34.4767	152.346
CB4858	54	6.1656	5.92115	6.04338	28.6729	115.568
CB4858	54	5.87347	5.22424	5.54885	24.0995	89.4557
CB4858	54	5.35872	5.79626	5.57749	24.3949	90.848
CB4858	54	5.23811	5.5059	5.372	22.6513	81.1723
CB4858	54	5.65765	5.35872	5.50818	23.8115	87.5032
CB4858	54	5.57395	5.55048	5.56221	24.2987	90.1034
CB4858	54	5.01801	5.11751	5.06776	20.1688	68.1471
CB4858	54	5.94801	6.11423	6.03112	28.563	114.866
CB4858	54	5.81545	5.76703	5.79124	26.3406	101.698
CB4858	54	5.70533	5.4873	5.59631	24.5883	91.7708
CB4858	54	5.4563	5.28137	5.36883	22.6326	81.0285
CB4858	54	5.3289	5.37053	5.34971	22.4773	80.166
CB4858	54	5.73338	6.1687	5.95104	27.7776	110.351
CB4858	54	5.57055	5.5084	5.53948	24.0998	89.0031
CB4858	55	5.7384	5.27502	5.50671	23.7741	87.4328
CB4858	55	5.58531	5.46973	5.52752	23.994	88.428
CB4858	55	5.43415	4.81017	5.12216	20.5297	70.3652
CB4858	55	4.17068	4.13451	4.1526	13.5432	37.4937
CB4858	55	5.33702	5.23162	5.28432	21.9293	77.262
CB4858	55	5.41629	5.7384	5.57734	24.4108	90.8407
CB4858	55	3.7668	4.40658	4.08669	13.0366	35.7365
CB4858	55	5.62325	5.85369	5.73847	25.8528	98.9434
CB4858	55	4.45042	4.89505	4.67273	17.1099	53.421
CB4858	55	4.37026	4.14381	4.25704	14.2232	40.3944
CB4858	55	6.23189	6.11423	6.17306	29.9262	123.169
CB4858	55	5.21686	5.23073	5.2238	21.4319	74.6375
CB4858	55	5.5084	5.46619	5.4873	23.6483	86.5115
CB4858	55	6.30141	6.01282	6.15712	29.7582	122.217
CB4858	55	6.23189	5.35429	5.79309	26.2066	101.796
CB4858	55	5.7257	5.42795	5.57683	24.4093	90.8155
CB4858	55	4.87113	4.60129	4.73621	17.6035	55.6277
CB4858	55	5.8463	5.5462	5.69625	25.4663	96.7756
CB4858	55	6.38703	4.76972	5.57838	23.9266	90.8912
CB4858	55	6.00647	5.57055	5.78851	26.2789	101.555
CB4858	56	5.70193	5.06127	5.3816	22.6658	81.608
CB4858	56	4.27269	4.03487	4.15378	13.5401	37.5257
CB4858	56	5.91303	5.6516	5.78231	26.2465	101.229
CB4858	56	5.67728	5.43504	5.55616	24.2344	89.8096
CB4858	56	4.40658	3.96711	4.18685	13.7299	38.429
CB4858	56	5.87347	6.01046	5.94196	27.7263	109.847
CB4858	56	4.54401	4.40111	4.47256	15.7069	46.8455
CB4858	56	5.02776	4.85829	4.94302	19.1844	63.2378
CB4858	56	4.51522	4.20419	4.35971	14.9091	43.3881
CB4858	56	5.38042	5.09182	5.23612	21.5169	75.1671
CB4858	56	5.29052	4.88604	5.08828	20.3023	68.9782
CB4858	56	5.4439	5.10422	5.27406	21.8237	76.8128
CB4858	56	4.64218	4.11222	4.3772	14.993	43.9125
CB4858	56	4.93638	5.21125	5.07381	20.2041	68.3915
CB4858	56	6.27986	5.59225	5.93606	27.5821	109.52
CB4858	56	6.07615	5.57483	5.82549	26.6042	103.513
CB4858	56	5.01034	4.68779	4.84906	18.447	59.6997
CB4858	56	4.81415	4.28745	4.5508	16.211	49.3471
CB4858	56	4.19607	4.64528	4.42067	15.3089	45.2339
CB4858	56	5.53306	5.3912	5.46213	23.4283	85.3265
CB4932	57	5.15988	5.2855	5.22269	21.4198	74.59
CB4932	57	4.89401	4.98037	4.93719	19.1433	63.0143
CB4932	57	5.02968	4.66816	4.84892	18.4406	59.6943
CB4932	57	5.57395	5.04119	5.30757	22.0692	78.2863
CB4932	57	5.29598	4.89505	5.09551	20.3607	69.2728
CB4932	57	5.25657	4.95306	5.10481	20.4487	69.6528
CB4932	57	5.186	4.76972	4.97786	19.4274	64.5843
CB4932	57	5.45895	4.82626	5.1426	20.6923	71.2112
CB4932	57	5.57055	5.22335	5.39695	22.8527	82.3084
CB4932	57	5.55048	5.13729	5.34388	22.3952	79.9042
CB4932	57	5.67138	4.67539	5.17338	20.8255	72.4974
CB4932	57	4.46341	5.17951	4.82146	18.157	58.686
CB4932	57	4.01686	4.56645	4.29165	14.4064	41.3879
CB4932	57	5.713	5.94801	5.83051	26.6886	103.781
CB4932	57	4.88604	5.23811	5.06208	20.1012	67.9181
CB4932	57	5.23811	6.12767	5.68289	25.2093	96.0963
CB4932	57	5.45807	6.26215	5.86011	26.8443	105.37
CB4932	57	3.87707	4.35801	4.11754	13.2703	36.552
CB4932	57	5.17951	6.09283	5.63617	24.7855	93.7455
CB4932	57	4.84633	5.78962	5.31798	22.037	78.7477
CB4932	58	5.90476	5.60347	5.75412	25.9866	99.755
CB4932	58	5.38396	4.03487	4.70942	17.0617	54.689
CB4932	58	6.01282	5.09655	5.55468	24.0682	89.738
CB4932	58	6.519	6.17727	6.34814	31.6277	133.948
CB4932	58	5.35429	5.4439	5.39909	22.8929	82.4064
CB4932	58	5.81973	5.54265	5.68119	25.3344	96.0102
CB4932	58	5.38396	5.0843	5.23413	21.4992	75.0813
CB4932	58	5.88675	5.29967	5.59321	24.5027	91.6183
CB4932	58	5.09655	6.25595	5.67625	25.0414	95.7597
CB4932	58	5.13729	5.16637	5.15183	20.8454	71.5951
CB4932	58	5.84704	5.93502	5.89103	27.2552	107.047
CB4932	58	5.13257	5.45895	5.29576	22.0056	77.7649
CB4932	58	6.50793	5.10983	5.80888	26.118	102.631
CB4932	58	5.55048	5.55668	5.55358	24.2234	89.6844
CB4932	58	5.15988	5.15146	5.15567	20.8766	71.7553
CB4932	58	6.33286	5.20003	5.76644	25.864	100.397
CB4932	58	4.70019	4.72588	4.71303	17.4457	54.8151
CB4932	58	5.42072	5.4873	5.45401	23.3617	84.9465
CB4932	58	5.82638	6.27986	6.05312	28.7368	116.128
CB4932	58	4.98908	5.59225	5.29067	21.9128	77.5407
CB4932	59	5.1184	4.57914	4.84877	18.4081	59.6888
CB4932	59	6.07615	5.42338	5.74976	25.8814	99.5287
CB4932	59	4.94524	5.43415	5.1897	21.1061	73.1854
CB4932	59	4.96472	5.10319	5.03396	19.8988	66.7924
CB4932	59	4.51522	4.92059	4.7179	17.4496	54.9852
CB4932	59	5.19353	5.55402	5.37378	22.6548	81.2526
CB4932	59	4.98908	5.19353	5.09131	20.3504	69.1013
CB4932	59	5.35429	5.68835	5.52132	23.9209	88.1308
CB4932	59	6.02492	5.7384	5.88166	27.1539	106.536
CB4932	59	4.85829	4.98908	4.92369	19.0368	62.4985
CB4932	59	5.70872	5.19634	5.45253	23.2984	84.8776
CB4932	59	6.03216	5.9765	6.00433	28.3146	113.342
CB4932	59	5.87347	5.15604	5.51475	23.7849	87.8166
CB4932	59	5.77368	5.6516	5.71264	25.6279	97.6131
CB4932	59	4.5077	3.4906	3.99915	12.3579	33.4889
CB4932	59	5.59565	6.34216	5.9689	27.8726	111.348
CB4932	59	5.62325	5.15235	5.3878	22.7553	81.8904
CB4932	59	4.9324	5.57055	5.25147	21.5797	75.8302
CB4932	59	5.47239	5.29598	5.38418	22.7621	81.7256
CB4932	59	5.15988	5.70621	5.43305	23.1248	83.9709
CB4932	60	4.98037	4.42857	4.70447	17.3227	54.5169
CB4932	60	5.57144	5.04503	5.30823	22.076	78.3157
CB4932	60	5.33436	4.91867	5.12651	20.6072	70.5448
CB4932	60	4.32125	4.72484	4.52305	16.0357	48.4498
CB4932	60	4.75643	4.27726	4.51685	15.9785	48.2508
CB4932	60	4.20419	4.81415	4.50917	15.8962	48.0053
CB4932	60	4.7991	4.889	4.84405	18.4276	59.5146
CB4932	60	5.02672	5.06127	5.044	19.9818	67.1928
CB4932	60	5.96765	6.41567	6.19166	30.0701	124.285
CB4932	60	5.39474	5.57144	5.48309	23.6063	86.3126
CB4932	60	5.2418	4.66816	4.95498	19.2184	63.6978
CB4932	60	5.70872	5.10983	5.40928	22.9106	82.8737
CB4932	60	5.11456	4.92162	5.01809	19.77	66.1627
CB4932	60	4.734	4.7402	4.7371	17.6244	55.6589
CB4932	60	5.84217	5.57144	5.7068	25.5642	97.3145
CB4932	60	4.67539	4.99971	4.83755	18.3591	59.2755
CB4932	60	5.13729	5.45807	5.29768	22.0223	77.8494
CB4932	60	4.734	5.15988	4.94694	19.1848	63.3881
CB4932	60	4.81017	4.88604	4.8481	18.459	59.6643
CB4932	60	5.10319	5.26852	5.18586	21.1164	73.0231
CB4932	61	5.10614	4.84633	4.97624	19.4355	64.5211
CB4932	61	5.98374	5.29967	5.6417	24.9064	94.022
CB4932	61	4.94125	4.75348	4.84737	18.4475	59.6371
CB4932	61	4.96472	5.25657	5.11065	20.4969	69.8917
CB4932	61	4.95306	5.0843	5.01868	19.7785	66.1861
CB4932	61	5.27502	5.78888	5.53195	23.9833	88.6407
CB4932	61	5.42072	5.36964	5.39518	22.8608	82.2274
CB4932	61	5.0499	4.97639	5.01314	19.7373	65.9673
CB4932	61	5.08046	5.21686	5.14866	20.8162	71.4629
CB4932	61	4.95306	5.11751	5.03529	19.9078	66.8453
CB4932	61	5.713	5.28594	5.49947	23.7179	87.0887
CB4932	61	4.07783	4.31328	4.19555	13.8142	38.6693
CB4932	61	5.87347	5.28594	5.5797	24.3841	90.9562
CB4932	61	5.94152	5.26395	5.60273	24.564	92.087
CB4932	61	4.44717	4.0576	4.25239	14.1724	40.2622
CB4932	61	4.7402	5.19353	4.96686	19.3352	64.1572
CB4932	61	4.20419	3.91796	4.06107	12.937	35.0688
CB4932	61	5.10422	4.80707	4.95565	19.2708	63.7234
CB4932	61	4.64218	4.51522	4.5787	16.4623	50.2603
CB4932	61	5.51992	5.10422	5.31207	22.1285	78.4857
CB4932	62	5.45895	5.16637	5.31266	22.1506	78.5118
CB4932	62	4.71259	4.40111	4.55685	16.2897	49.5443
CB4932	62	5.21686	4.86228	5.03957	19.9223	67.016
CB4932	62	5.63624	5.26395	5.4501	23.3019	84.7639
CB4932	62	5.7384	4.45913	5.09876	20.097	69.4053
CB4932	62	5.7257	4.80515	5.26542	21.6085	76.4361
CB4932	62	5.16637	4.99676	5.08156	20.2751	68.7054
CB4932	62	5.81545	5.37776	5.59661	24.5626	91.7853
CB4932	62	4.6379	4.94229	4.79009	18.0027	57.5479
CB4932	62	5.48287	5.54088	5.51187	23.8603	87.6792
CB4932	62	5.13729	5.91539	5.52634	23.8675	88.3714
CB4932	62	5.23162	5.55402	5.39282	22.8209	82.1195
CB4932	62	4.99971	4.60129	4.8005	18.0682	57.9238
CB4932	62	5.79626	5.3261	5.56118	24.2464	90.0532
CB4932	62	4.90287	4.84131	4.87209	18.6425	60.5543
CB4932	62	4.5077	3.92918	4.21844	13.9106	39.3055
CB4932	62	5.35872	5.20003	5.27937	21.8855	77.0452
CB4932	62	5.16637	4.77784	4.9721	19.3868	64.3605
CB4932	62	5.76703	5.50147	5.63425	24.9184	93.6498
CB4932	62	5.67817	5.29052	5.48434	23.5937	86.3719
CB4932	63	4.84633	5.0902	4.96827	19.3748	64.2116
CB4932	63	4.734	4.23637	4.48518	15.7511	47.2432
CB4932	63	4.898	4.64218	4.77009	17.8579	56.83
CB4932	63	5.05359	4.75643	4.90501	18.8787	61.7901
CB4932	63	4.03487	4.23283	4.13385	13.4138	36.9882
CB4932	63	5.29967	4.85519	5.07743	20.209	68.5379
CB4932	63	4.89505	4.57914	4.7371	17.6048	55.6589
CB4932	63	4.57811	4.97343	4.77577	17.8827	57.0334
CB4932	63	4.97934	4.9324	4.95587	19.2894	63.732
CB4932	63	4.70019	4.889	4.79459	18.0478	57.7104
CB4932	63	4.65148	4.53338	4.59243	16.5616	50.7138
CB4932	63	5.11751	4.67849	4.898	18.8042	61.5255
CB4932	63	4.70949	5.4439	5.07669	20.136	68.508
CB4932	63	4.898	5.23073	5.06437	20.122	68.0102
CB4932	63	5.10614	5.47239	5.28926	21.9462	77.4791
CB4932	63	5.16637	4.7616	4.96399	19.3209	64.0457
CB4932	63	5.24638	5.63713	5.44175	23.2278	84.3753
CB4932	63	4.67539	5.15988	4.91763	18.9473	62.2683
CB4932	63	5.26026	5.01801	5.13914	20.7314	71.0671
CB4932	63	5.09182	5.04503	5.06843	20.1756	68.1739
CX11262	64	7.09664	7.30714	7.20189	40.7277	195.586
CX11262	64	6.75682	5.57483	6.16583	29.5845	122.736
CX11262	64	5.77958	6.00883	5.89421	27.2757	107.22
CX11262	64	6.26215	5.68584	5.974	27.9646	111.633
CX11262	64	5.42707	5.63624	5.53165	24.024	88.6265
CX11262	64	5.15604	6.86635	6.0112	27.8056	113.732
CX11262	64	5.5896	6.11423	5.85191	26.8418	104.928
CX11262	64	5.96765	5.63624	5.80195	26.417	102.263
CX11262	64	4.92059	4.86124	4.89091	18.7869	61.2588
CX11262	64	6.74545	5.58531	6.16538	29.5902	122.71
CX11262	64	6.4511	5.48995	5.97053	27.8158	111.439
CX11262	64	5.54708	5.10614	5.32661	22.2458	79.1319
CX11262	64	5.23811	5.19722	5.21767	21.3814	74.3752
CX11262	64	5.79626	5.43504	5.61565	24.7423	92.7254
CX11262	64	4.70019	4.53131	4.61575	16.7274	51.4904
CX11262	64	6.1656	5.7384	5.952	27.7879	110.405
CX11262	64	4.13806	4.5077	4.32288	14.6501	42.2977
CX11262	64	6.33906	6.07054	6.2048	30.2233	125.078
CX11262	64	5.67728	5.21582	5.44655	23.257	84.5987
CX11262	64	5.82298	5.48287	5.65292	25.0751	94.5841
CX11262	65	5.54088	5.27502	5.40795	22.9558	82.8126
CX11262	65	5.49792	5.02776	5.26284	21.7102	76.3237
CX11262	65	6.61127	4.8791	5.74519	25.3346	99.2912
CX11262	65	4.23637	4.05288	4.14463	13.4849	37.2782
CX11262	65	5.73249	4.55892	5.1457	20.5256	71.34
CX11262	65	5.29967	5.29967	5.29967	22.0591	77.9373
CX11262	65	4.78286	4.84633	4.8146	18.205	58.4357
CX11262	65	4.75038	5.65425	5.20232	21.0957	73.7206
CX11262	65	4.88604	5.10703	4.99654	19.5982	65.3139
CX11262	65	5.19722	5.33436	5.26579	21.7743	76.4522
CX11262	65	4.71259	5.60347	5.15803	20.7399	71.8539
CX11262	65	4.31328	4.1016	4.20744	13.8947	38.9989
CX11262	65	5.87347	4.67539	5.27443	21.5676	76.8289
CX11262	65	4.62638	5.31798	4.97218	19.3231	64.3634
CX11262	65	5.51903	5.29052	5.40478	22.9325	82.6669
CX11262	65	5.33436	4.99971	5.16704	20.9468	72.2309
CX11262	65	5.63713	5.08046	5.35879	22.4932	80.5749
CX11262	65	5.68835	5.57144	5.6299	24.8911	93.4328
CX11262	65	5.47239	5.98625	5.72932	25.7289	98.4707
CX11262	65	5.06127	5.15988	5.11057	20.5111	69.8887
CX11262	66	5.51903	5.239	5.37902	22.7092	81.4906
CX11262	66	4.97639	4.85519	4.91579	18.9762	62.1982
CX11262	66	5.22335	4.78286	5.0031	19.6212	65.5718
CX11262	66	4.53131	4.98037	4.75584	17.7246	56.3224
CX11262	66	4.84633	4.89401	4.87017	18.6281	60.4828
CX11262	66	4.7991	4.62963	4.71436	17.45	54.8615
CX11262	66	5.02289	5.77958	5.40123	22.8002	82.5045
CX11262	66	4.6128	3.91929	4.26604	14.1991	40.6513
CX11262	66	5.74858	5.0843	5.41644	22.9552	83.2032
CX11262	66	4.90287	5.97813	5.4405	23.02	84.317
CX11262	66	5.99909	4.88604	5.44257	23.0214	84.4131
CX11262	66	5.5059	5.29967	5.40278	22.9175	82.5755
CX11262	66	5.41363	5.57144	5.49254	23.689	86.7596
CX11262	66	5.61041	6.06094	5.83568	26.707	104.057
CX11262	66	6.21476	6.24975	6.23225	30.5054	126.746
CX11262	66	5.19722	5.72157	5.4594	23.3548	85.1986
CX11262	66	5.02289	4.76057	4.89173	18.7803	61.2894
CX11262	66	5.9644	5.70621	5.83531	26.7304	104.037
CX11262	66	5.19353	6.08722	5.64038	24.8297	93.9556
CX11262	66	5.24919	4.56527	4.90723	18.8212	61.8738
CX11262	67	5.72157	6.28769	6.00463	28.255	113.359
CX11262	67	5.62325	7.02667	6.32496	31.0332	132.487
CX11262	67	3.93287	3.9525	3.94268	12.2087	32.0903
CX11262	67	6.33286	5.68835	6.0106	28.2928	113.698
CX11262	67	4.70432	4.91867	4.8115	18.1733	58.3229
CX11262	67	5.15988	5.15146	5.15567	20.8766	71.7553
CX11262	67	4.889	5.70621	5.2976	21.9108	77.8462
CX11262	67	5.5059	5.20844	5.35717	22.523	80.5016
CX11262	67	3.99634	4.40658	4.20146	13.831	38.8328
CX11262	67	4.03856	4.411	4.22478	13.9912	39.4832
CX11262	67	5.95052	5.13729	5.54391	24.0093	89.2168
CX11262	67	5.67817	5.186	5.43209	23.1276	83.9264
CX11262	67	6.00647	5.7316	5.86904	27.0387	105.852
CX11262	67	5.84542	5.01137	5.4284	23.0071	83.7554
CX11262	67	5.41983	5.11751	5.26867	21.7838	76.5776
CX11262	67	5.35872	5.13729	5.248	21.6215	75.68
CX11262	67	5.38396	5.78962	5.58679	24.4817	91.3032
CX11262	67	5.35429	4.58756	4.97092	19.2918	64.3147
CX11262	67	5.33436	4.88708	5.11072	20.4749	69.8948
CX11262	67	5.77958	5.1184	5.44899	23.2338	84.7122
CX11262	68	5.81383	5.41363	5.61373	24.7196	92.6304
CX11262	68	4.84633	5.16637	5.00635	19.6648	65.6996
CX11262	68	5.10703	5.8097	5.45836	23.303	85.1502
CX11262	68	5.23073	5.88675	5.55874	24.184	89.9349
CX11262	68	5.64731	4.91867	5.28299	21.8162	77.2037
CX11262	68	5.51549	4.67642	5.09596	20.2576	69.2909
CX11262	68	5.06614	4.62638	4.84626	18.4081	59.5962
CX11262	68	5.42795	5.239	5.33348	22.3344	79.4383
CX11262	68	5.7257	5.41983	5.57277	24.3727	90.6173
CX11262	68	5.34794	5.54	5.44397	23.2694	84.4784
CX11262	68	4.06838	3.47938	3.77388	11.1177	28.1425
CX11262	68	4.95306	5.4873	5.22018	21.3463	74.4826
CX11262	68	5.54088	5.20475	5.37282	22.65	81.2091
CX11262	68	5.32698	4.85519	5.09109	20.3132	69.0923
CX11262	68	5.90801	5.3261	5.61705	24.7138	92.7949
CX11262	68	5.08046	5.57395	5.3272	22.2411	79.1583
CX11262	68	6.00647	5.06614	5.5363	23.8994	88.8502
CX11262	68	5.50147	5.19722	5.34935	22.4564	80.1494
CX11262	68	5.29052	5.08046	5.18549	21.1101	73.0075
CX11262	68	5.33702	5.54088	5.43895	23.2256	84.2449
CX11262	69	5.3912	5.46619	5.42869	23.1451	83.7691
CX11262	69	5.82638	5.59565	5.71101	25.6058	97.5299
CX11262	69	5.45895	5.77368	5.61631	24.7544	92.7583
CX11262	69	5.37584	4.96768	5.17176	20.9744	72.4292
CX11262	69	5.37776	5.35149	5.36462	22.603	80.8382
CX11262	69	4.13097	4.32125	4.22611	14.0201	39.5204
CX11262	69	5.06038	5.1646	5.11249	20.5263	69.9675
CX11262	69	3.92918	4.24552	4.08735	13.1015	35.754
CX11262	69	5.73249	5.70799	5.72024	25.699	98.0034
CX11262	69	3.89316	4.13924	4.0162	12.6565	33.9191
CX11262	69	5.10983	5.28137	5.1956	21.1955	73.4354
CX11262	69	5.51903	5.8562	5.68761	25.3845	96.3361
CX11262	69	5.43504	5.35606	5.39555	22.8633	82.2443
CX11262	69	5.47755	5.20475	5.34115	22.3912	79.7817
CX11262	69	5.6671	5.19353	5.43031	23.116	83.8443
CX11262	69	5.10422	5.10703	5.10563	20.4733	69.686
CX11262	69	5.08046	5.15235	5.1164	20.5588	70.1282
CX11262	69	5.23073	4.99676	5.11375	20.5277	70.019
CX11262	69	5.37776	5.01521	5.19649	21.1827	73.473
CX11262	69	5.31798	5.17951	5.24874	21.6334	75.712
CX11262	70	5.09182	4.52379	4.8078	18.0911	58.1888
CX11262	70	4.84131	5.24092	5.04112	19.9279	67.0778
CX11262	70	4.97934	5.09655	5.03794	19.9314	66.9512
CX11262	70	4.09687	4.10986	4.10337	13.2242	36.1759
CX11262	70	4.32347	5.01801	4.67074	17.0394	53.3526
CX11262	70	4.79806	5.02289	4.91047	18.9282	61.9967
CX11262	70	4.86124	5.38396	5.1226	20.556	70.3835
CX11262	70	5.51903	4.734	5.12651	20.5202	70.5448
CX11262	70	4.61177	4.94229	4.77703	17.9013	57.0784
CX11262	70	4.89505	4.99676	4.9459	19.2103	63.3483
CX11262	70	5.36964	4.7616	5.06562	20.0811	68.0608
CX11262	70	4.80618	5.10614	4.95616	19.2745	63.7434
CX11262	70	5.19722	4.82626	5.01174	19.7003	65.912
CX11262	70	4.86124	5.10703	4.98414	19.4987	64.8288
CX11262	70	5.07942	4.98908	5.03425	19.9033	66.8042
CX11262	70	5.06614	5.11456	5.09035	20.3505	69.0623
CX11262	70	4.97934	5.10703	5.04318	19.9724	67.1603
CX11262	70	5.36964	5.10983	5.23974	21.5497	75.323
CX11262	70	5.59565	5.15235	5.374	22.6436	81.2627
CX11262	70	4.64528	5.01034	4.82781	18.2797	58.918
CX11264	71	5.5146	5.78637	5.65049	25.0617	94.4619
CX11264	71	5.81545	5.79375	5.8046	26.4626	102.404
CX11264	71	5.35149	4.81017	5.08083	20.2174	68.6755
CX11264	71	5.29052	5.69514	5.49283	23.6643	86.7735
CX11264	71	5.239	5.29052	5.26476	21.7689	76.4072
CX11264	71	4.82626	5.11456	4.97041	19.3869	64.2946
CX11264	71	5.46619	5.10983	5.28801	21.9372	77.4239
CX11264	71	5.63359	5.27502	5.4543	23.3399	84.9603
CX11264	71	4.14854	3.80134	3.97494	12.3857	32.8844
CX11264	71	5.56184	4.88604	5.22394	21.3435	74.6438
CX11264	71	5.2418	5.10422	5.17301	21.0136	72.4819
CX11264	71	5.57395	5.77958	5.67676	25.3017	95.7858
CX11264	71	5.78962	5.51903	5.65433	25.0959	94.6545
CX11264	71	5.48287	5.15235	5.31761	22.1872	78.7313
CX11264	71	5.239	4.98908	5.11404	20.5286	70.0311
CX11264	71	5.19634	5.40463	5.30048	22.0573	77.9731
CX11264	71	4.91867	4.98908	4.95387	19.2734	63.6551
CX11264	71	5.90565	5.81383	5.85974	26.9662	105.35
CX11264	71	4.53338	4.48939	4.51139	15.9845	48.076
CX11264	71	5.61041	4.89505	5.25273	21.5696	75.8846
CX11264	72	4.67539	5.36964	5.02252	19.7176	66.3381
CX11264	72	4.86124	4.38901	4.62513	16.7573	51.8047
CX11264	72	5.23073	5.186	5.20837	21.3052	73.9782
CX11264	72	5.3261	4.98908	5.15759	20.8699	71.8354
CX11264	72	5.23811	4.86124	5.04968	19.9992	67.4202
CX11264	72	4.9324	4.54091	4.73665	17.591	55.6433
CX11264	72	4.03605	3.98542	4.01074	12.6334	33.7809
CX11264	72	5.39474	5.17951	5.28712	21.9457	77.385
CX11264	72	5.08046	5.25657	5.16851	20.9747	72.2928
CX11264	72	4.89401	4.40111	4.64756	16.9168	52.5624
CX11264	72	5.06038	4.96856	5.01447	19.7471	66.0198
CX11264	72	5.59565	5.36964	5.48265	23.5986	86.2917
CX11264	72	4.88604	5.07942	4.98273	19.4922	64.7741
CX11264	72	4.80515	4.53131	4.66823	17.101	53.2667
CX11264	72	5.06614	4.898	4.98207	19.4888	64.7482
CX11264	72	5.35606	4.73208	5.04407	19.9061	67.1957
CX11264	72	4.82626	4.31446	4.57036	16.3541	49.9862
CX11264	72	4.5505	3.98542	4.26796	14.2437	40.7062
CX11264	72	5.11751	5.5462	5.33185	22.2917	79.3657
CX11264	72	5.32255	4.73208	5.02731	19.7816	66.5283
CX11264	73	5.8122	5.24638	5.52929	23.9492	88.5131
CX11264	73	5.15988	4.61177	4.88582	18.6894	61.0677
CX11264	73	5.9644	5.10319	5.5338	23.9055	88.7295
CX11264	73	5.3261	4.72588	5.02599	19.7688	66.4756
CX11264	73	4.81017	4.88708	4.84862	18.4629	59.6834
CX11264	73	5.32698	5.28594	5.30646	22.1153	78.2373
CX11264	73	5.186	4.23283	4.70942	17.2406	54.689
CX11264	73	5.51903	4.898	5.20852	21.2311	73.9845
CX11264	73	5.33702	4.72484	5.03093	19.8051	66.672
CX11264	73	5.6671	5.47755	5.57232	24.3802	90.5957
CX11264	73	5.37776	5.41363	5.3957	22.8655	82.251
CX11264	73	5.01905	4.97343	4.99624	19.605	65.3023
CX11264	73	4.88604	4.48836	4.6872	17.224	53.9187
CX11264	73	5.5059	5.45895	5.48242	23.6063	86.2813
CX11264	73	4.9324	5.10319	5.01779	19.7692	66.1511
CX11264	73	4.92944	4.94229	4.93586	19.1344	62.9634
CX11264	73	5.35149	5.40463	5.37806	22.7159	81.447
CX11264	73	5.38396	4.89505	5.1395	20.699	71.0825
CX11264	73	5.01905	5.23073	5.12489	20.6193	70.4778
CX11264	73	3.72015	4.1016	3.91087	11.984	31.3198
CX11264	74	4.9138	4.9138	4.9138	18.9637	62.1226
CX11264	74	5.54088	5.58531	5.5631	24.3062	90.1465
CX11264	74	5.11456	5.24638	5.18047	21.0745	72.7957
CX11264	74	5.41363	6.04264	5.72814	25.6924	98.4098
CX11264	74	5.89576	5.57144	5.7336	25.7986	98.6916
CX11264	74	5.15707	4.66712	4.9121	18.9035	62.0583
CX11264	74	5.87184	5.41983	5.64584	24.9948	94.2288
CX11264	74	5.32255	5.4873	5.40492	22.9387	82.6737
CX11264	74	5.01521	5.0344	5.0248	19.8302	66.4288
CX11264	74	5.55402	5.06614	5.31008	22.0991	78.3974
CX11264	74	6.22421	6.14036	6.18229	30.0171	123.722
CX11264	74	3.9032	4.27269	4.08794	13.0982	35.7695
CX11264	74	5.05846	4.53663	4.79755	18.0236	57.817
CX11264	74	4.80515	4.94229	4.87372	18.652	60.6149
CX11264	74	5.41629	5.77368	5.59498	24.5609	91.7054
CX11264	74	5.8122	5.51549	5.66385	25.1776	95.1335
CX11264	74	5.51903	5.29967	5.40935	22.9722	82.8771
CX11264	74	5.77368	5.5896	5.68164	25.3468	96.0326
CX11264	74	5.38042	4.9138	5.14711	20.7646	71.3984
CX11264	74	4.69502	4.13924	4.41713	15.2633	45.1252
CX11264	75	4.86228	4.8732	4.86774	18.6099	60.3921
CX11264	75	5.7257	5.01905	5.37237	22.5704	81.189
CX11264	75	4.62638	4.53663	4.5815	16.4841	50.3527
CX11264	75	5.49792	5.2418	5.36986	22.6344	81.0753
CX11264	75	5.49792	5.35429	5.42611	23.1201	83.6496
CX11264	75	4.5505	3.89316	4.22183	13.914	39.4004
CX11264	75	4.89505	4.36805	4.63155	16.7932	52.0208
CX11264	75	5.70621	5.87184	5.78903	26.3155	101.582
CX11264	75	4.84633	5.3912	5.11876	20.5205	70.2254
CX11264	75	6.11822	5.20003	5.65912	24.9874	94.8956
CX11264	75	4.38458	4.45588	4.42023	15.3445	45.2203
CX11264	75	5.39474	4.94524	5.16999	20.9531	72.3548
CX11264	75	5.99584	5.72659	5.86121	26.9672	105.429
CX11264	75	6.55532	6.08648	6.3209	31.3365	132.232
CX11264	75	5.19634	4.86228	5.02931	19.8439	66.6075
CX11264	75	5.94565	5.68584	5.81575	26.5512	102.995
CX11264	75	6.1253	5.84704	5.98617	28.129	112.317
CX11264	75	4.42311	4.94229	4.6827	17.169	53.7634
CX11264	75	4.97934	4.76057	4.86995	18.6174	60.4746
CX11264	75	4.94908	5.32698	5.13803	20.706	71.0212
CX11264	76	5.28594	4.71658	5.00126	19.5812	65.4993
CX11264	76	4.33129	3.92165	4.12647	13.3406	36.7904
CX11264	76	4.90287	4.55892	4.7309	17.5551	55.4407
CX11264	76	4.96768	4.91867	4.94317	19.1907	63.2435
CX11264	76	5.46884	4.96472	5.21678	21.3246	74.3373
CX11264	76	4.70949	4.48939	4.59944	16.6055	50.9464
CX11264	76	5.24919	4.97639	5.11279	20.5161	69.9796
CX11264	76	5.10614	4.82626	4.9662	19.355	64.1315
CX11264	76	5.43504	5.09182	5.26343	21.7353	76.3494
CX11264	76	5.43504	4.7991	5.11707	20.4857	70.1555
CX11264	76	4.49264	5.15988	4.82626	18.2067	58.8613
CX11264	76	5.63359	5.06614	5.34986	22.4157	80.1727
CX11264	76	5.67728	5.5059	5.59159	24.5504	91.5386
CX11264	76	5.23073	5.07942	5.15508	20.8673	71.7306
CX11264	76	4.38901	4.32686	4.35794	14.9152	43.3352
CX11264	76	4.8422	4.81415	4.82818	18.3085	58.9316
CX11264	76	6.24975	5.5462	5.89797	27.2237	107.425
CX11264	76	4.74935	5.07942	4.91439	18.9469	62.145
CX11264	76	5.69514	5.96765	5.8314	26.693	103.828
CX11264	76	5.70621	5.69514	5.70068	25.5236	97.0015
CX11264	77	5.29701	5.08046	5.18874	21.136	73.1448
CX11264	77	5.42072	5.82889	5.6248	24.816	93.1795
CX11264	77	4.72898	4.44599	4.58748	16.513	50.5501
CX11264	77	4.79304	4.46769	4.63037	16.8184	51.981
CX11264	77	5.29967	5.24638	5.27303	21.8373	76.7677
CX11264	77	5.3261	5.32255	5.32432	22.2648	79.03
CX11264	77	5.55402	4.70949	5.13175	20.5433	70.7614
CX11264	77	5.38042	4.78286	5.08164	20.2113	68.7084
CX11264	77	5.02289	4.81415	4.91852	18.9917	62.302
CX11264	77	5.19634	5.09182	5.14408	20.7807	71.2725
CX11264	77	5.32255	4.72484	5.0237	19.7514	66.3849
CX11264	77	5.51903	5.43504	5.47704	23.5589	86.0271
CX11264	77	4.72794	5.16637	4.94716	19.1844	63.3966
CX11264	77	5.33436	5.24638	5.29037	21.9802	77.5277
CX11264	77	5.31798	4.9324	5.12519	20.6013	70.49
CX11264	77	5.15604	4.82522	4.99063	19.54	65.0826
CX11264	77	6.11896	5.37776	5.74836	25.8445	99.4559
CX11264	77	5.21686	5.31517	5.26601	21.7779	76.4618
CX11264	77	4.72898	5.06127	4.89512	18.7982	61.4171
CX11264	77	5.46619	5.25199	5.35909	22.5475	80.5882
CX11271	78	5.3912	5.10422	5.24771	21.6125	75.6673
CX11271	78	4.8732	4.27269	4.57294	16.3533	50.071
CX11271	78	5.22985	5.02776	5.1288	20.6516	70.6393
CX11271	78	5.54088	4.898	5.21944	21.3151	74.451
CX11271	78	5.45895	4.94908	5.20401	21.2189	73.7928
CX11271	78	5.78888	5.91864	5.85376	26.9095	105.028
CX11271	78	4.78891	5.91303	5.35097	22.2401	80.2225
CX11271	78	5.72157	6.04264	5.8821	27.1539	106.561
CX11271	78	5.16637	5.28594	5.22616	21.4486	74.7388
CX11271	78	5.39474	4.86921	5.13198	20.6309	70.7705
CX11271	78	5.15146	5.38396	5.26771	21.7832	76.5358
CX11271	78	5.28137	6.08722	5.68429	25.2496	96.1674
CX11271	78	5.53306	5.59476	5.56391	24.3129	90.1859
CX11271	78	5.15988	5.21582	5.18785	21.1374	73.1073
CX11271	78	5.50147	5.186	5.34374	22.4079	79.8976
CX11271	78	5.3723	4.51522	4.94376	19.0515	63.2661
CX11271	78	5.73338	5.02968	5.38153	22.6485	81.6047
CX11271	78	4.54401	3.93656	4.24028	14.049	39.9193
CX11271	78	4.53663	4.40658	4.4716	15.7009	46.8153
CX11271	78	5.3261	5.7595	5.5428	24.0926	89.1633
CX11271	79	5.08046	4.94908	5.01477	19.7477	66.0314
CX11271	79	6.15217	4.63273	5.39245	22.3849	82.1026
CX11271	79	5.74858	5.60347	5.67603	25.2993	95.7485
CX11271	79	5.0843	4.85519	4.96974	19.3877	64.2688
CX11271	79	5.54088	5.68584	5.61336	24.7436	92.6121
CX11271	79	5.68835	5.23073	5.45954	23.3689	85.2055
CX11271	79	5.65765	5.77619	5.71692	25.6665	97.8327
CX11271	79	6.56491	6.12383	6.34437	31.5749	133.71
CX11271	79	6.31219	5.79375	6.05297	28.723	116.119
CX11271	79	6.12767	5.28137	5.70452	25.4174	97.1975
CX11271	79	6.41803	6.16472	6.29138	31.0746	130.387
CX11271	79	5.42795	5.8097	5.61882	24.7673	92.8827
CX11271	79	6.79328	5.41629	6.10479	28.8982	119.127
CX11271	79	6.55163	4.92059	5.73611	25.3195	98.8213
CX11271	79	5.42972	4.98037	5.20505	21.2388	73.8368
CX11271	79	5.90476	5.76703	5.8359	26.7451	104.069
CX11271	79	5.62325	5.85944	5.74135	25.8782	99.0924
CX11271	79	5.43504	5.15707	5.29605	22.0138	77.7779
CX11271	79	5.57395	5.04119	5.30757	22.0692	78.2863
CX11271	79	6.11423	5.8562	5.98521	28.1221	112.263
CX11271	80	5.79626	5.57395	5.6851	25.3747	96.2086
CX11271	80	6.60536	6.28769	6.44652	32.6195	140.273
CX11271	80	5.97813	5.79213	5.88513	27.1953	106.725
CX11271	80	6.59444	5.98374	6.28909	30.9913	130.245
CX11271	80	6.49007	6.27986	6.38497	32.0103	136.293
CX11271	80	6.25905	5.54088	5.89996	27.2381	107.534
CX11271	80	5.87184	5.67905	5.77545	26.1903	100.869
CX11271	80	7.22448	6.39678	6.81063	36.2959	165.409
CX11271	80	6.4421	5.94565	6.19387	30.0827	124.419
CX11271	80	5.8097	5.35429	5.58199	24.4312	91.0681
CX11271	80	5.76703	5.73249	5.74976	25.9648	99.5287
CX11271	80	5.38042	5.25657	5.31849	22.213	78.7706
CX11271	80	5.7257	5.63624	5.68097	25.3459	95.9989
CX11271	80	6.30614	6.51679	6.41146	32.2766	137.997
CX11271	80	4.6097	5.19353	4.90162	18.8029	61.6619
CX11271	80	5.29967	5.10703	5.20335	21.2573	73.7646
CX11271	80	5.713	5.10422	5.40861	22.9026	82.8432
CX11271	80	4.33129	3.96711	4.1492	13.4953	37.4018
CX11271	80	6.07379	6.10479	6.08929	29.1219	118.222
CX11271	80	6.16162	5.8562	6.00891	28.34	113.602
CX11271	81	6.44505	6.15217	6.29861	31.1419	130.838
CX11271	81	5.13257	5.10422	5.1184	20.5757	70.2102
CX11271	81	5.46619	4.72484	5.09551	20.2844	69.2728
CX11271	81	4.57914	4.31668	4.44791	15.5247	46.0751
CX11271	81	5.46884	5.44832	5.45858	23.4017	85.1605
CX11271	81	5.61735	5.31798	5.46766	23.4621	85.5862
CX11271	81	5.67728	5.29701	5.48715	23.619	86.5045
CX11271	81	6.0546	5.54088	5.79774	26.3484	102.041
CX11271	81	6.45641	5.74858	6.1025	29.1502	118.993
CX11271	81	5.85206	5.6293	5.74068	25.8734	99.058
CX11271	81	6.14435	5.92115	6.03275	28.574	114.959
CX11271	81	5.41363	5.63359	5.52361	23.9532	88.2404
CX11271	81	7.037	5.77958	6.40829	31.9429	137.792
CX11271	81	5.93502	5.98374	5.95938	27.8923	110.816
CX11271	81	4.8732	4.64528	4.75924	17.7793	56.4431
CX11271	81	5.76703	5.37776	5.5724	24.3581	90.5993
CX11271	81	5.70799	5.63624	5.67211	25.2675	95.5506
CX11271	81	5.98374	5.8097	5.89672	27.3033	107.357
CX11271	81	5.84704	5.61041	5.72873	25.7644	98.4403
CX11271	81	4.45042	4.55892	4.50467	15.935	47.8616
CX11271	82	4.62638	4.33469	4.48053	15.7503	47.0964
CX11271	82	5.86697	6.3733	6.12014	29.3676	120.028
CX11271	82	6.21255	5.98699	6.09977	29.2124	118.833
CX11271	82	4.8422	4.0576	4.4499	15.4313	46.1371
CX11271	82	5.47755	5.95776	5.71765	25.6306	97.8706
CX11271	82	5.6293	5.77619	5.70275	25.5379	97.107
CX11271	82	6.31145	5.8122	6.06183	28.8111	116.63
CX11271	82	5.99348	5.70193	5.84771	26.8405	104.702
CX11271	82	4.75348	4.51522	4.63435	16.857	52.1154
CX11271	82	5.21686	4.98908	5.10297	20.4418	69.5773
CX11271	82	6.05784	5.02776	5.5428	23.9212	89.1633
CX11271	82	5.38396	5.31517	5.34957	22.4755	80.1594
CX11271	82	6.8324	7.18418	7.00829	38.5514	180.233
CX11271	82	6.33596	5.98374	6.15985	29.7766	122.379
CX11271	82	6.4421	6.1253	6.2837	30.9917	129.911
CX11271	82	5.53306	5.25657	5.39481	22.8432	82.2105
CX11271	82	5.61646	5.39474	5.5056	23.797	87.3801
CX11271	82	6.03216	5.22985	5.631	24.7772	93.488
CX11271	82	5.23162	5.42338	5.3275	22.2841	79.1714
CX11271	82	5.80719	5.97075	5.88897	27.2323	106.934
CX11271	83	6.75903	6.14346	6.45125	32.6128	140.582
CX11271	83	5.91864	5.65425	5.78645	26.2837	101.446
CX11271	83	5.87347	5.88262	5.87804	27.1366	106.34
CX11271	83	5.73338	6.03216	5.88277	27.1627	106.597
CX11271	83	6.41567	4.99971	5.70769	25.1928	97.3598
CX11271	83	5.17198	4.80515	4.98856	19.5188	65.0018
CX11271	83	6.50793	4.88604	5.69699	24.9741	96.8132
CX11271	83	6.50188	6.27691	6.3894	32.0534	136.577
CX11271	83	6.39751	5.85206	6.12479	29.4042	120.302
CX11271	83	5.77619	6.55827	6.16723	29.7523	122.82
CX11271	83	6.22805	5.89576	6.0619	28.8391	116.634
CX11271	83	5.59565	4.5505	5.07308	19.9986	68.3617
CX11271	83	5.6516	5.78637	5.71898	25.6843	97.9389
CX11271	83	5.06614	5.15604	5.11109	20.5155	69.9099
CX11271	83	5.67817	5.56184	5.62	24.8037	92.9413
CX11271	83	5.92115	5.42795	5.67455	25.2425	95.6738
CX11271	83	6.51384	5.7595	6.13667	29.4654	121.003
CX11271	83	6.82531	6.67253	6.74892	35.7687	160.954
CX11271	83	5.48287	5.23073	5.3568	22.5248	80.485
CX11271	83	5.57055	5.29967	5.43511	23.1866	84.0667
CX11271	84	5.13729	4.67849	4.90789	18.8769	61.8989
CX11271	84	6.0546	5.33436	5.69448	25.3663	96.6853
CX11271	84	5.85369	5.66444	5.75906	26.0421	100.012
CX11271	84	5.49792	5.13729	5.31761	22.1831	78.7313
CX11271	84	4.66609	4.65458	4.66033	17.0578	52.9968
CX11271	84	6.82531	7.35202	7.08867	39.4112	186.506
CX11271	84	5.90565	6.80834	6.35699	31.579	134.51
CX11271	84	5.99112	6.34747	6.1693	29.8675	122.943
CX11271	84	5.45807	5.45807	5.45807	23.3974	85.1364
CX11271	84	6.6405	6.1938	6.41715	32.3033	138.365
CX11271	84	5.51903	5.27502	5.39703	22.8653	82.3118
CX11271	84	4.96856	5.05359	5.01108	19.7206	65.8858
CX11271	84	6.6529	5.76615	6.20952	30.1291	125.364
CX11271	84	6.1969	6.11822	6.15756	29.7776	122.243
CX11271	84	6.25211	5.23073	5.74142	25.685	99.0962
CX11271	84	4.72588	4.48939	4.60763	16.6632	51.2191
CX11271	84	5.59476	4.98908	5.29192	21.9226	77.5959
CX11271	84	6.28075	5.55668	5.91871	27.4105	108.563
CX11271	84	5.1184	5.15988	5.13914	20.7426	71.0671
CX11271	84	7.46185	6.88953	7.17569	40.3762	193.459
CX11276	85	5.25657	4.94524	5.1009	20.4164	69.4928
CX11276	85	4.45913	4.57914	4.51914	16.037	48.3242
CX11276	85	5.61041	5.85369	5.73205	25.7937	98.6116
CX11276	85	5.63964	6.11423	5.87694	27.0821	106.28
CX11276	85	5.7595	5.92602	5.84276	26.8064	104.437
CX11276	85	4.6097	4.82626	4.71798	17.4732	54.9878
CX11276	85	5.41629	5.10614	5.26122	21.7212	76.253
CX11276	85	4.88708	5.37776	5.13242	20.6415	70.7889
CX11276	85	5.10983	5.20844	5.15914	20.9028	71.9002
CX11276	85	4.75348	4.86228	4.80788	18.1527	58.1914
CX11276	85	5.7384	5.68835	5.71337	25.637	97.651
CX11276	85	5.19634	5.38042	5.28838	21.9585	77.4402
CX11276	85	5.77619	5.46619	5.62119	24.7979	92.9999
CX11276	85	5.5084	6.0633	5.78585	26.2316	101.415
CX11276	85	5.45895	5.70872	5.58384	24.4759	91.1585
CX11276	85	5.55668	5.81545	5.68606	25.3798	96.2574
CX11276	85	5.66532	6.08722	5.87627	27.0853	106.244
CX11276	85	5.81545	5.69514	5.7553	26.0123	99.8164
CX11276	85	4.75038	4.7737	4.76204	17.8104	56.543
CX11276	85	4.9324	5.15235	5.04237	19.9596	67.1279
CX11276	86	4.45913	5.13257	4.79585	17.9752	57.7557
CX11276	86	4.66712	4.88604	4.77658	17.91	57.0625
CX11276	86	5.41629	5.73249	5.57439	24.3857	90.6966
CX11276	86	4.84131	5.5146	5.17796	20.9685	72.69
CX11276	86	5.20844	5.51903	5.36374	22.5767	80.7981
CX11276	86	5.06127	4.66816	4.86471	18.5564	60.2795
CX11276	86	5.15988	4.79806	4.97897	19.4444	64.6274
CX11276	86	5.32255	5.21125	5.2669	21.7847	76.5004
CX11276	86	4.6097	4.81017	4.70993	17.415	54.707
CX11276	86	6.03777	5.76615	5.90196	27.3434	107.643
CX11276	86	5.13449	5.94477	5.53963	23.973	89.0102
CX11276	86	4.5505	4.84633	4.69842	17.3206	54.3068
CX11276	86	4.15208	4.58756	4.36982	14.9602	43.6907
CX11276	86	5.36964	5.6293	5.49947	23.7405	87.0887
CX11276	86	4.93638	5.46884	5.20261	21.2028	73.7332
CX11276	86	4.94229	5.16637	5.05433	20.0541	67.6066
CX11276	86	4.05406	3.82171	3.93789	12.1685	31.9733
CX11276	86	5.53306	5.24092	5.38699	22.7752	81.8534
CX11276	86	4.76972	4.8422	4.80596	18.1395	58.1218
CX11276	86	4.84633	5.26852	5.05743	20.0536	67.7311
CX11276	87	5.7257	5.74961	5.73766	25.8558	98.9014
CX11276	87	6.5878	5.77619	6.18199	29.8862	123.704
CX11276	87	4.92944	5.10703	5.01824	19.7722	66.1686
CX11276	87	5.8122	5.68835	5.75028	25.9667	99.5555
CX11276	87	5.7595	5.54265	5.65108	25.0722	94.4915
CX11276	87	4.62638	4.32347	4.47492	15.7095	46.9197
CX11276	87	4.12049	4.72484	4.42267	15.2907	45.2951
CX11276	87	6.07054	6.26215	6.16634	29.8566	122.767
CX11276	87	5.08046	5.25657	5.16851	20.9747	72.2928
CX11276	87	4.82626	4.71259	4.76942	17.8632	56.8063
CX11276	87	5.3723	5.59565	5.48397	23.6102	86.3545
CX11276	87	5.59225	5.56878	5.58052	24.4589	90.9959
CX11276	87	5.41629	5.6293	5.5228	23.9468	88.2015
CX11276	87	4.54401	4.84131	4.69266	17.278	54.1074
CX11276	87	5.99112	5.88675	5.93894	27.6996	109.679
CX11276	87	5.51549	5.63624	5.57587	24.4154	90.7686
CX11276	87	5.33702	5.38396	5.36049	22.5679	80.6515
CX11276	87	5.22985	5.43504	5.33244	22.3245	79.3921
CX11276	87	4.92059	4.92944	4.92501	19.0504	62.5491
CX11276	87	4.83128	5.0499	4.94059	19.1617	63.1444
CX11276	88	5.65425	5.14984	5.40205	22.8696	82.5417
CX11276	88	5.23811	5.73249	5.4853	23.5835	86.4172
CX11276	88	5.68584	5.78962	5.73773	25.8544	98.9052
CX11276	88	5.37584	5.7257	5.55077	24.1749	89.5486
CX11276	88	5.01521	5.32255	5.16888	20.9652	72.3083
CX11276	88	5.38765	5.57483	5.48124	23.5896	86.2255
CX11276	88	4.84633	5.0499	4.94812	19.2214	63.4335
CX11276	88	4.40658	4.8732	4.63989	16.8657	52.3023
CX11276	88	5.17198	5.19353	5.18276	21.0965	72.8922
CX11276	88	4.32347	4.62638	4.47492	15.7095	46.9197
CX11276	88	5.21951	5.99112	5.60532	24.56	92.2145
CX11276	88	5.68835	5.42972	5.55904	24.258	89.9493
CX11276	88	5.20475	5.72157	5.46316	23.3886	85.3749
CX11276	88	5.24638	5.95052	5.59845	24.5191	91.8761
CX11276	88	4.45913	4.74935	4.60424	16.6331	51.106
CX11276	88	4.41986	4.51522	4.46754	15.6739	46.6879
CX11276	88	4.97934	5.41629	5.19781	21.1818	73.5294
CX11276	88	5.55668	5.44832	5.5025	23.7776	87.2326
CX11276	88	5.36964	5.01905	5.19435	21.1669	73.3823
[truncated: 11,541 more rows]

## Sheet: 2 male mating and fertilization
Strain	# of fertilized females	# of total offspring
LSJ1	3	524
LSJ1	4	333
LSJ1	3	521
LSJ1	4	413
LSJ1	2	453
LSJ1	2	508
LSJ1	2	430
LSJ1	3	610
LSJ1	3	583
LSJ1	3	381
JU561	1	230
JU561	2	59
JU561	0	0
JU561	0	0
JU561	0	0
JU561	0	0
JU561	1	162
JU561	0	0
JU561	0	0
JU561	0	0
CX11285	4	963
CX11285	5	674
CX11285	0	0
CX11285	3	874
CX11285	4	746
CX11285	4	1024
CX11285	5	1068
CX11285	3	1019
CX11285	6	956
CX11285	3	890
N2	2	836
N2	0	0
N2	1	336
N2	2	712
N2	2	591
N2	1	517
N2	0	0
N2	0	0
N2	1	72
N2	2	620
CB4856	2	866
CB4856	2	811
CB4856	4	945
CB4856	2	720
CB4856	0	0
CB4856	3	748
CB4856	0	0
CB4856	2	553
CB4856	2	756
CB4856	0	0
EG4946	0	0
EG4946	2	413
EG4946	2	840
EG4946	1	305
EG4946	2	399
EG4946	2	388
EG4946	3	701
EG4946	0	0
EG4946	4	546
EG4946	1	310
JU782	3	200
JU782	5	405
JU782	5	594
JU782	2	26
JU782	3	136
JU782	2	165
JU782	3	343
JU782	3	308
JU782	4	269
JU782	0	0
JU393	0	0
JU393	0	0
JU393	0	0
JU393	0	0
JU393	0	0
JU393	0	0
JU393	0	0
JU393	0	0
JU393	0	0
JU393	1	65

## Sheet: 3 ejaculate size
Strain	Sperm number
LSJ1	216
LSJ1	118
LSJ1	103
LSJ1	115
LSJ1	154
LSJ1	939
LSJ1	520
LSJ1	1488
LSJ1	640
LSJ1	1894
LSJ1	1298
LSJ1	971
LSJ1	1862
JU561	845
JU561	444
JU561	48
JU561	1171
JU561	1067
JU561	503
JU561	215
JU561	656
JU561	304
JU561	543
CX11285	2479
CX11285	237
CX11285	236
CX11285	1055
CX11285	643
CX11285	648
CX11285	845
CX11285	321
CX11285	670
CX11285	912
N2	714
N2	353
N2	1718
N2	1678
N2	645
N2	686
N2	282
N2	394
N2	895
N2	430
N2	1796
CB4856	1243
CB4856	1040
CB4856	122
CB4856	534
CB4856	302
CB4856	246
CB4856	775
CB4856	1160
CB4856	1136
CB4856	598
EG4946	1279
EG4946	1027
EG4946	391
EG4946	1291
EG4946	1286
EG4946	513
EG4946	1208
EG4946	1698
EG4946	1071
EG4946	414
EG4946	1273
EG4946	1228
EG4946	516
JU782	36
JU782	3
JU782	795
JU782	225
JU782	372
JU782	44
JU782	10
JU782	619
JU782	238
JU782	300
JU393	719
JU393	275
JU393	378
JU393	164
JU393	475
JU393	364
JU393	404
JU393	174
JU393	681
JU393	392

## Sheet: 4  male fertilization sucess
Strain	% male offspring
LSJ1	32.3024
LSJ1	39.8089
LSJ1	47.9167
LSJ1	18.8889
LSJ1	41.0072
LSJ1	36.5535
LSJ1	47.079
LSJ1	44.2424
LSJ1	34.3891
LSJ1	41.129
LSJ1	38.0342
LSJ1	34.2342
JU561	32.1608
JU561	15.8845
JU561	15.4982
JU561	37.7863
JU561	20
JU561	16.4894
JU561	35.7143
JU561	27.3585
JU561	39.5833
JU561	33.1839
CX11285	31.377
CX11285	25.5411
CX11285	28.7206
CX11285	32.5203
CX11285	45.7895
CX11285	40.6143
CX11285	39.8754
CX11285	35.5769
CX11285	35.5615
CX11285	47.0852
CX11285	45.3172
CX11285	49.7992
CX11285	45.8874
CX11285	32.3529
CX11285	54.2553
CX11285	29.7561
N2	32.4561
N2	37.6884
N2	35.7595
N2	42.5876
N2	44.6886
N2	37.9421
N2	42
N2	29.1536
N2	39.801
N2	40.4167
N2	47.2727
N2	42.2794
CB4856	27.5253
CB4856	24.0854
CB4856	22.9412
CB4856	29.2857
CB4856	20.6897
CB4856	44.0514
CB4856	42.9648
CB4856	46.7626
CB4856	37.1212
CB4856	42.1203
CB4856	39.1304
CB4856	32.3529
CB4856	47.4419
CB4856	40.4545
CB4856	39.899
EG4946	23.0594
EG4946	27.2727
EG4946	23.6025
EG4946	26.8362
EG4946	37.9121
EG4946	38.191
EG4946	38.2789
EG4946	24.5562
EG4946	46.875
EG4946	47.9866
EG4946	39.3305
EG4946	35.1449
EG4946	32.0463
EG4946	43.0328
EG4946	40.3226
JU782	24.3902
JU782	26.8519
JU782	25
JU782	26.1261
JU782	25.448
JU782	26.6667
JU782	10.1167
JU782	14.5522
JU782	3.44828
JU782	16.3569
JU782	15
JU782	18.4211
JU782	17.2897
JU782	12.2581
JU393	26.183
JU393	15.5738
JU393	29.6296
JU393	44.6367
JU393	30.5994
JU393	37.0213
JU393	26.0465
JU393	27.1493
JU393	27.5676
JU393	27.5229

## Sheet: 5 male-male comp ability
Strain	D1 total	D1 GFP-positive	D1 GFP-negative	D1 % GFP-negative	D2 total	D2 GFP-positive	D2 GFP-negative	D2 % GFP-negative	D3 total	D3 GFP-positive	D3 GFP-negative	D3 % GFP-negative	D4 total	D4 GFP-positive	D4 GFP-negative	D4 % GFP-negative	TOTAL	TOTAL GFP-positive	TOTAL GFP-negative	Total % GFP-negative
LSJ1	108	93	15	13.8889	143	64	79	55.2448	152	83	69	45.3947	39	21	18	46.1538	442	261	181	40.9502
LSJ1	56	52	4	7.14286	137	137	0	0	113	83	30	26.5487	79	69	10	12.6582	385	341	44	11.4286
LSJ1	82	74	8	9.7561	145	101	44	30.3448	68	41	27	39.7059	48	33	15	31.25	343	249	94	27.4052
LSJ1	116	110	6	5.17241	143	80	63	44.0559	101	74	27	26.7327	47	31	16	34.0426	407	295	112	27.5184
LSJ1	88	79	9	10.2273	151	94	57	37.7483	126	85	41	32.5397	51	34	17	33.3333	416	292	124	29.8077
LSJ1	102	90	12	11.7647	139	100	39	28.0576	97	62	35	36.0825	53	36	17	32.0755	391	288	103	26.3427
LSJ1	71	64	7	9.85915	161	111	50	31.0559	131	82	49	37.4046	49	35	14	28.5714	412	292	120	29.1262
LSJ1	49	46	3	6.12245	125	96	29	23.2	99	77	22	22.2222	39	23	16	41.0256	312	242	70	22.4359
LSJ1	122	117	5	4.09836	154	102	52	33.7662	117	86	31	26.4957	63	38	25	39.6825	456	343	113	24.7807
LSJ1	115	92	23	20	138	95	43	31.1594	108	85	23	21.2963	51	34	17	33.3333	412	306	106	25.7282
JU561	163	151	12	7.36196	146	46	100	68.4932	40	7	33	82.5	3	1	2	66.6667	352	205	147	41.7614
JU561	166	138	28	16.8675	147	61	86	58.5034	56	7	49	87.5	43	23	20	46.5116	412	229	183	44.4175
JU561	140	138	2	1.42857	145	44	101	69.6552	76	10	66	86.8421	18	2	16	88.8889	379	194	185	48.8127
JU561	132	132	0	0	129	126	3	2.32558	75	67	8	10.6667	25	23	2	8	361	348	13	3.60111
JU561	141	141	0	0	174	73	101	58.046	89	21	68	76.4045	6	1	5	83.3333	410	236	174	42.439
JU561	152	152	0	0	187	187	0	0	92	63	29	31.5217	43	42	1	2.32558	474	444	30	6.32911
JU561	141	90	51	36.1702	86	12	74	86.0465	0				0				227	102	125	55.0661
JU561	148	148	0	0	171	99	72	42.1053	64	25	39	60.9375	22	10	12	54.5455	405	282	123	30.3704
JU561	139	139	0	0	146	146	0	0	35	21	14	40	12	11	1	8.33333	332	317	15	4.51807
JU561	151	151	0	0	164	119	45	27.439	62	58	4	6.45161	8	7	1	12.5	385	335	50	12.987
JU561	72	69	3	4.16667	0				0				0				72	69	3	4.16667
JU561	155	155	0	0	177	177	0	0	59	48	11	18.6441	26	18	8	30.7692	417	398	19	4.55635
JU561	192	186	6	3.125	205	154	51	24.878	68	32	36	52.9412	25	14	11	44	490	386	104	21.2245
JU561	175	175	0	0	145	145	0	0	66	47	19	28.7879	40	39	1	2.5	426	406	20	4.69484
JU561	190	82	108	56.8421	85	17	68	80	3	0	3	100	0				278	99	179	64.3885
JU561	159	156	3	1.88679	162	109	53	32.716	57	9	48	84.2105	54	18	36	66.6667	432	292	140	32.4074
JU561	142	142	0	0	153	150	3	1.96078	18	15	3	16.6667	0				313	307	6	1.91693
JU561	149	131	18	12.0805	145	36	109	75.1724	32	18	14	43.75	0				326	185	141	43.2515
JU561	130	124	6	4.61538	169	120	49	28.9941	89	22	67	75.2809	24	1	23	95.8333	412	267	145	35.1942
JU561	158	158	0	0	182	180	2	1.0989	72	39	33	45.8333	31	23	8	25.8065	443	400	43	9.70655
CX11285	146	76	70	47.9452	138	104	34	24.6377	98	79	19	19.3878	46	38	8	17.3913	428	297	131	30.6075
CX11285	183	66	117	63.9344	180	105	75	41.6667	104	73	31	29.8077	53	51	2	3.77358	520	295	225	43.2692
CX11285	180	51	129	71.6667	152	10	142	93.4211	134	77	57	42.5373	110	98	12	10.9091	576	236	340	59.0278
CX11285	175	57	118	67.4286	159	155	4	2.51572	50	48	2	4	62	55	7	11.2903	446	315	131	29.3722
CX11285	137	72	65	47.4453	158	155	3	1.89873	121	99	22	18.1818	72	72	0	0	488	398	90	18.4426
CX11285	199	41	158	79.397	154	88	66	42.8571	129	101	28	21.7054	125	111	14	11.2	607	341	266	43.8221
CX11285	182	89	93	51.0989	177	175	2	1.12994	82	82	0	0	46	46	0	0	487	392	95	19.5072
CX11285	35	24	11	31.4286	16	6	10	62.5	0				0				51	30	21	41.1765
CX11285	144	48	104	72.2222	246	188	58	23.5772	93	83	10	10.7527	32	32	0	0	515	351	172	33.3981
CX11285	162	79	83	51.2346	209	95	114	54.5455	111	90	21	18.9189	91	91	0	0	573	355	218	38.0454
CX11285	193	62	131	67.8756	239	165	74	30.9623	84	73	11	13.0952	57	57	0	0	573	357	216	37.6963
CX11285	202	35	167	82.6733	190	125	65	34.2105	129	129	0	0	63	63	0	0	584	352	232	39.726
CX11285	187	54	133	71.123	229	106	123	53.7118	106	93	13	12.2642	53	53	0	0	575	306	269	46.7826
CX11285	186	51	135	72.5806	228	115	113	49.5614	94	75	19	20.2128	55	50	5	9.09091	563	291	272	48.3126
CX11285	179	71	108	60.3352	232	156	76	32.7586	67	66	1	1.49254	30	27	3	10	508	320	188	37.0079
CX11285	176	103	73	41.4773	180	188	-8	-4.44444	67	64	3	4.47761	36	36	0	0	459	391	68	14.8148
N2	179	69	110	61.4525	162	73	89	54.9383	62	48	14	22.5806	25	17	8	32	428	207	229.581	53.6403
N2	133	65	68	51.1278	159	25	134	84.2767	118	48	70	59.322	48	24	24	50	458	162	285.322	62.2974
N2	152	56	96	63.1579	139	32	107	76.9784	75	37	38	50.6667	39	19	20	51.2821	405	144	273.667	67.572
N2	159	48	111	69.8113	135	30	105	77.7778	35	11	24	68.5714	29	9	20	68.9655	358	98	304.571	85.0758
N2	135	47	88	65.1852	149	70	79	53.0201	108	81	27	25	51	35	16	31.3725	443	233	208	46.9526
N2	142	142	0	0	178	177	1	0.561798	76	58	18	23.6842	10	9	1	10	406	386	25.6842	6.32616
N2	78	47	31	39.7436													78	47	31	39.7436
N2	152	39	113	74.3421	182	110	72	39.5604	59	28	31	52.5424	6	4	2	33.3333	399	181	239.542	60.0357
N2	142	58	84	59.1549	170	105	65	38.2353	59	28	31	52.5424	20	8	12	60	391	199	213.542	54.6144
N2	137	88	49	35.7664	118	79	39	33.0508	27	15	12	44.4444	0				282	182	132.444	46.9661
N2	146	107	39	26.7123	178	168	10	5.61798	73	67	6	8.21918	33	30	3	9.09091	430	372	60.2192	14.0045
N2	170	94	76	44.7059	185	85	100	54.0541	60	44	16	26.6667	27	21	6	22.2222	442	244	208.667	47.2097
N2	157	107	50	31.8471	184	174	10	5.43478	111	83	28	25.2252	64	50	14	21.875	516	414	99.2252	19.2297
N2	151	151	0	0	46	36	10	21.7391	5	2	3	60	0				202	189	70	34.6535
CB4856	121	64	58	47.9339	105	49	56	53.3333	73	31	42	57.5342	34	24	10	29.4118	333	168	166	49.8498
CB4856	156	98	58	37.1795	166	57	109	65.6627	63	20	43	68.254	25	0	25	100	410	175	235	57.3171
CB4856	168	68	100	59.5238	163	26	137	84.0491	114	31	83	72.807	57	20	37	64.9123	502	145	357	71.1155
CB4856	140	62	78	55.7143	130	33	97	74.6154	84	34	50	59.5238	60	43	17	28.3333	414	172	242	58.4541
CB4856	177	76	101	57.0621	136	128	8	5.88235	98	88	10	10.2041	17	16	1	5.88235	428	308	120	28.0374
CB4856	158	128	30	18.9873	152	151	1	0.657895	108	33	75	69.4444	48	25	23	47.9167	466	337	129	27.6824
CB4856	166	49	117	70.4819	123	59	64	52.0325	37	26	11	29.7297	7	5	2	28.5714	333	139	194	58.2583
CB4856	194	55	139	71.6495	224	39	185	82.5893	87	34	53	60.9195	25	17	8	32	530	145	385	72.6415
CB4856	173	76	97	56.0694	132	50	82	62.1212	54	26	28	51.8519	29	10	19	65.5172	388	162	226	58.2474
CB4856	114	24	90	78.9474	111	0	111	100	16	1	15	93.75	3	0	3	100	244	25	219	89.7541
CB4856	180	38	142	78.8889	174	14	160	91.954	52	30	22	42.3077	18	11	7	38.8889	424	93	331	78.066
CB4856	172	44	128	74.4186	179	39	140	78.2123	25	8	17	68	14	8	6	42.8571	390	99	291	74.6154
CB4856	160	37	123	76.875	83	0	83	100	121	9	112	92.562	36	9	27	75	400	55	345	86.25
CB4856	171	171	0	0	134	12	122	91.0448	65	2	63	96.9231	41	1	40	97.561	411	186	225	54.7445
CB4856	172	124	48	27.907	125	8	117	93.6	147	45	102	69.3878	102	75	27	26.4706	546	252	294	53.8462
CB4856	93	70	23	24.7312	34	9	25	73.5294	31	0	31	100	57	14	43	75.4386	215	93	122	56.7442
CB4856	126	87	39	30.9524	196	123	73	37.2449	100	65	35	35	103	97	6	5.82524	525	372	153	29.1429
CB4856	130	88	42	32.3077	196	5	191	97.449	147	27	120	81.6327	98	59	39	39.7959	571	179	392	68.6515
CB4856	149	132	17	11.4094	121	17	104	85.9504	124	28	96	77.4194	72	53	19	26.3889	466	230	236	50.6438
EG4946	145	145	0	0	155	150	5	3.22581	25	20	5	20	15	15	0	0	340	330	10	2.94118
EG4946	163	53	110	67.4847	107	69	38	35.514	43	24	19	44.186	29	14	15	51.7241	342	160	182	53.2164
EG4946	117	117	0	0	165	160	5	3.0303	107	97	10	9.34579	49	44	5	10.2041	438	418	20	4.56621
EG4946	122	81	41	33.6066	159	110	49	30.8176	97	65	32	32.9897	58	48	10	17.2414	436	304	132	30.2752
EG4946	148	78	70	47.2973	155	69	86	55.4839	77	57	20	25.974	57	46	11	19.2982	437	250	187	42.7918
EG4946	123	123	0	0	225	169	56	24.8889	65	43	22	33.8462	32	30	2	6.25	445	365	80	17.9775
EG4946	192	52	140	72.9167	78	78	0	0	73	73	0	0	34	34	0	0	377	237	140	37.1353
EG4946	168	4	164	97.619	160	105	55	34.375	75	53	22	29.3333	45	30	15	33.3333	448	192	256	57.1429
EG4946	176	150	26	14.7727	163	99	64	39.2638	123	72	51	41.4634	93	73	20	21.5054	555	394	161	29.009
EG4946	134	134	0	0	168	146	22	13.0952	42	40	2	4.7619	0				344	320	24	6.97674
EG4946	118	118	0	0	137	92	45	32.8467	25	15	10	40	12	4	8	66.6667	292	229	63	21.5753
EG4946	181	150	31	17.1271	135	107	28	20.7407	112	96	16	14.2857	76	73	3	3.94737	504	426	78	15.4762
EG4946	171	110	61	35.6725	164	113	51	31.0976	97	93	4	4.12371	68	62	6	8.82353	500	378	122	24.4
EG4946	30	8	22	73.3333	47	8	39	82.9787	70	13	57	81.4286	76	57	19	25	223	86	137	61.435
JU782	171	164	7	4.09357	140	126	14	10	103	97	6	5.82524	67	64	3	4.47761	481	451	30	6.23701
JU782	160	160	0	0	85	81	4	4.70588	7	7	0	0	0				252	248	4	1.5873
JU782	184	179	5	2.71739	145	131	14	9.65517	69	65	4	5.7971	47	44	3	6.38298	445	419	26	5.8427
JU782	182	182	0	0	201	201	0	0	42	38	4	9.52381	12	12	0	0	437	433	4	0.915332
JU782	189	174	15	7.93651	182	176	6	3.2967	136	118	18	13.2353	68	68	0	0	575	536	39	6.78261
JU782	169	169	0	0	147	144	3	2.04082	61	60	1	1.63934	29	29	0	0	406	402	4	0.985222
JU782	190	190	0	0	181	181	0	0	140	131	9	6.42857	88	82	6	6.81818	599	584	15	2.50417
JU782	165	163	2	1.21212	158	150	8	5.06329	112	102	10	8.92857	51	48	3	5.88235	486	463	23	4.73251
JU782	172	164	8	4.65116	170	151	19	11.1765	99	87	12	12.1212	67	67	0	0	508	469	39	7.67717
JU782	182	182	0	0	164	158	6	3.65854	121	116	5	4.13223	74	74	0	0	541	530	11	2.03327
JU782	194	190	4	2.06186	157	150	7	4.4586	112	102	10	8.92857	81	79	2	2.46914	544	521	23	4.22794
JU393	161	38	123	76.3975	167	102	65	38.9222	37	24	13	54.1667	0				365	164	201	55.0685
JU393	32	18	14	43.75	0				0				0				32	18	14	43.75
JU393	162	155	7	4.32099	114	114	0	0	0				0				276	269	7	2.53623
JU393	150	54	96	64	139	104	35	25.1799	82	64	18	28.125	30	30	0	0	401	252	149	37.1571
JU393	155	80	75	48.3871	163	162	1	0.613497	93	84	9	10.7143	29	29	0	0	440	355	85	19.3182
JU393	124	81	43	34.6774	54	51	3	5.55556	0				0				178	132	46	25.8427
JU393	131	59	72	54.9618	118	83	35	29.661	22	20	2	10	0				271	162	109	40.2214
JU393	154	135	19	12.3377	125	125	0	0	70	68	2	2.94118	31	31	0	0	380	359	21	5.52632
JU393	128	90	38	29.6875	169	129	40	23.6686	80	74	6	8.10811	10	10	0	0	387	303	84	21.7054
JU393	139	118	21	15.1079	146	124	22	15.0685	58	43	15	34.8837	38	36	2	5.26316	381	321	60	15.748

## Sheet: 6 hermaphrodite sperm size
Strain	Individual	Diameter 1	Diameter 2	Cross-sectional area
LSJ1	1	5.28137	5.34898	22.1874
LSJ1	1	3.79529	3.86363	11.5168
LSJ1	1	3.43347	3.57046	9.62826
LSJ1	1	4.15695	4.01568	13.1106
LSJ1	1	3.96106	3.76355	11.7084
LSJ1	1	3.30091	3.17986	8.24388
LSJ1	1	3.79529	3.55511	10.5971
LSJ1	1	3.1558	3.55511	8.81155
LSJ1	1	3.6459	3.6459	10.4399
LSJ1	1	2.83945	2.83945	6.33226
LSJ1	1	3.92239	3.73447	11.5045
LSJ1	1	3.57046	3.55511	9.96936
LSJ1	2	3.70229	3.54286	10.3018
LSJ1	2	2.83945	2.5138	5.60604
LSJ1	2	3.69048	3.45886	10.0255
LSJ1	3	3.96106	4.05347	12.6104
LSJ1	3	3.01084	2.90027	6.85829
LSJ1	3	3.1	3.11402	7.58182
LSJ1	3	3.69343	3.7169	10.782
LSJ1	3	3.224	3.88327	9.83291
LSJ1	3	3.76355	3.30091	9.7571
LSJ1	3	3.69048	3.3663	9.75721
LSJ1	3	3.78082	3.54906	10.5387
LSJ1	3	3.1592	3.34018	8.28773
LSJ1	3	3.75779	3.44617	10.1709
LSJ1	3	4.38163	3.72576	12.8215
LSJ1	3	3.9001	3.24083	9.92707
LSJ1	3	3.16953	2.86617	7.13488
LSJ1	3	3.27773	3.97479	10.2324
LSJ1	3	3.59482	3.92239	11.0743
LSJ1	3	3.83249	3.224	9.70433
LSJ1	3	3.3663	2.86617	7.57784
LSJ1	3	3.224	3.11402	7.88509
LSJ1	3	3.44617	3.47451	9.40415
LSJ1	3	3.54906	3.33043	9.28333
LSJ1	3	3.47451	2.98545	8.14691
LSJ1	3	3.224	3.33043	8.43307
LSJ1	3	3.3173	3.18665	8.3025
LSJ1	3	2.98545	2.95607	6.93129
LSJ1	3	3.24083	3.39849	8.6503
LSJ1	3	3.98852	3.8381	12.0231
LSJ1	3	3.82953	3.6459	10.9658
LSJ1	3	3.12805	3.08243	7.57281
LSJ1	3	3.59172	3.61888	10.2086
LSJ1	3	3.86363	4.14381	12.5744
LSJ1	3	3.83249	3.73742	11.2497
LSJ1	3	3.18665	3.30091	8.26149
LSJ1	3	3.70229	3.5089	10.2031
LSJ1	3	3.08243	3.01084	7.28905
LSJ1	3	3.40808	3.5089	9.39229
LSJ1	4	4.30383	4.48969	15.1761
LSJ1	4	3.10354	3.23758	7.89166
LSJ1	4	3.224	3.18665	8.069
LSJ1	4	3.40808	3.56736	9.54876
LSJ1	4	3.70229	3.89729	11.3324
LSJ1	4	3.92239	3.70229	11.4054
LSJ1	4	3.40808	3.3663	9.01059
LSJ1	4	4.16743	4.06159	13.294
LSJ1	4	3.65195	3.65195	10.4746
LSJ1	4	3.9001	3.76355	11.5282
LSJ1	4	3.9001	3.19344	9.78192
LSJ1	4	3.57046	3.70229	10.3821
LSJ1	4	3.87485	3.5089	10.6787
LSJ1	5	3.76355	4.01568	11.8699
LSJ1	5	4.40392	3.86363	13.3637
LSJ1	5	3.73447	3.27773	9.61373
LSJ1	5	3.78377	3.2677	9.71083
LSJ1	5	3.59482	3.224	9.10253
LSJ1	5	3.6459	3.65195	10.4573
LSJ1	5	3.59482	3.65195	10.3108
LSJ1	5	4.94908	4.83556	18.7958
LSJ1	5	3.8381	3.97479	11.9817
LSJ1	5	4.57855	4.02926	14.4892
LSJ1	5	4.68912	4.69133	17.2774
LSJ1	6	3.2677	3.27773	8.41211
LSJ1	6	3.5089	3.26105	8.98709
LSJ1	6	3.92239	3.83249	11.8065
LSJ1	6	3.76355	3.84946	11.3786
LSJ1	6	4.34162	4.15695	14.1748
LSJ1	6	3.30091	3.26105	8.45437
LSJ1	6	3.86363	3.59172	10.899
LSJ1	6	3.23758	3.23758	8.23249
LSJ1	6	3.30091	3.16953	8.21709
LSJ1	7	3.89729	3.69933	11.3234
LSJ1	7	3.12805	2.98545	7.33454
LSJ1	7	3.19344	3.24083	8.1284
LSJ1	7	3.98852	3.98852	12.4943
LSJ1	7	3.6459	3.6459	10.4399
LSJ1	7	3.93065	3.97479	12.2707
LSJ1	7	3.4996	3.6459	10.021
LSJ1	7	3.60382	3.3663	9.52811
LSJ1	7	3.3173	3.3173	8.64287
LSJ1	8	3.89729	3.75779	11.5023
LSJ1	8	3.89729	3.60382	11.031
LSJ1	8	4.30383	4.22722	14.2889
LSJ1	8	3.3173	3.17986	8.2848
LSJ1	8	3.11402	3.3173	8.11327
LSJ1	8	3.24083	3.57046	9.08804
LSJ1	8	3.3173	3.04331	7.92904
LSJ1	8	3.70229	3.97479	11.5578
LSJ1	8	3.6459	3.4996	10.021
LSJ1	8	3.39849	3.27773	8.74881
LSJ1	8	3.78377	3.92239	11.6564
LSJ1	9	2.98899	3.40808	8.00063
LSJ1	9	3.87485	3.86363	11.7582
LSJ1	9	3.78377	3.76355	11.1844
LSJ1	9	3.5089	3.59172	9.89837
LSJ1	9	4.76972	4.63302	17.3559
LSJ1	9	3.40808	3.61888	9.68666
LSJ1	9	3.3173	3.61888	9.42862
LSJ1	9	3.08243	3.47451	8.41157
LSJ1	9	3.76355	3.56736	10.5447
LSJ1	9	3.03962	3.16953	7.56666
LSJ1	9	3.65195	3.59172	10.3019
LSJ1	10	3.83249	3.54906	10.6828
LSJ1	10	4.13599	3.98852	12.9563
LSJ1	10	3.27773	3.69343	9.50809
LSJ1	10	3.04331	2.98899	7.14433
LSJ1	10	3.92239	3.6459	11.2317
LSJ1	10	3.96106	3.8381	11.9404
LSJ1	10	4.11222	4.01568	12.9696
LSJ1	10	3.3694	3.57046	9.4486
LSJ1	10	3.96106	3.39849	10.5727
LSJ1	10	3.5089	2.94131	8.10592
LSJ1	10	4.15961	3.97479	12.9854
LSJ1	10	4.09362	3.8096	12.2484
LSJ1	10	3.92239	3.83249	11.8065
LSJ1	10	4.11222	4.11754	13.2985
LSJ1	10	3.3173	3.65195	9.51478
LSJ1	10	3.78377	3.65195	10.8527
LSJ1	11	3.77226	3.60382	10.6771
LSJ1	11	3.76355	3.33043	9.84437
LSJ1	11	3.04331	3.11402	7.44318
LSJ1	11	3.78377	4.11754	12.2364
LSJ1	11	2.8086	2.95607	6.52071
LSJ1	11	3.97479	3.76355	11.749
LSJ1	11	3.55511	3.89729	10.8819
LSJ1	11	4.15961	3.73447	12.2003
LSJ1	11	3.69048	3.48396	10.0982
LSJ1	11	4.17526	4.15695	13.6316
LSJ1	11	4.26058	4.083	13.6627
LSJ1	11	4.28346	4.15695	13.9849
LSJ1	11	3.97479	3.76355	11.749
JU561	1	3.60382	3.84946	10.8957
JU561	1	3.97479	3.78377	11.8122
JU561	1	3.27773	3.6459	9.38572
JU561	1	3.11402	3.3694	8.24072
JU561	1	4.02926	4.17791	13.2213
JU561	1	3.34682	3.44617	9.05854
JU561	1	3.54906	3.69048	10.2869
JU561	1	3.96106	4.15961	12.9406
JU561	1	3.48396	3.34682	9.15788
JU561	1	4.31136	4.31136	14.5989
JU561	1	3.48396	3.89729	10.6641
JU561	1	3.57046	3.63099	10.1821
JU561	2	3.27773	3.11402	8.01651
JU561	2	3.8381	3.97479	11.9817
JU561	2	3.75779	3.19344	9.42501
JU561	2	3.3663	3.04331	8.04619
JU561	2	4.17791	3.97479	13.0426
JU561	2	4.1016	3.89729	12.5547
JU561	2	3.44617	3.23758	8.76288
JU561	2	3.82953	3.56736	10.7296
JU561	2	3.56736	3.16953	8.88038
JU561	2	3.37265	3.44307	9.12025
JU561	3	3.60382	3.44307	9.74538
JU561	3	3.77226	3.3694	9.98262
JU561	3	3.44307	3.48396	9.42124
JU561	3	3.86363	3.55511	10.7879
JU561	3	3.69933	3.70229	10.7568
JU561	3	3.5213	3.3173	9.1744
JU561	3	3.3663	3.04331	8.04619
JU561	3	3.72576	3.60382	10.5455
JU561	3	3.72576	3.6459	10.6686
JU561	3	4.45071	4.42857	15.4804
JU561	4	3.6459	3.44307	9.85915
JU561	4	2.61581	2.61581	5.37406
JU561	4	3.34682	3.55511	9.34491
JU561	4	3.9001	3.72576	11.4125
JU561	4	3.72576	3.5213	10.3041
JU561	4	3.3173	3.5089	9.14209
JU561	4	2.75782	2.86617	6.20809
JU561	4	3.63099	3.5089	10.0066
JU561	5	3.37265	3.45561	9.15349
JU561	5	3.23758	3.23758	8.23249
JU561	5	3.5089	3.3173	9.14209
JU561	5	3.30091	3.30091	8.5577
JU561	5	3.9001	3.84946	11.7914
JU561	5	3.76355	3.8381	11.345
JU561	5	3.6459	3.77226	10.8018
JU561	5	3.6459	3.39849	9.73149
JU561	5	3.44307	3.43347	9.28472
JU561	5	3.69933	3.56736	10.3648
JU561	5	3.25101	3.19344	8.15395
JU561	5	4.02926	3.82953	12.1188
JU561	5	3.44307	3.89729	10.539
JU561	5	3.78082	3.5213	10.4563
JU561	5	3.86363	3.96652	12.0364
JU561	6	3.8096	3.93065	11.7607
JU561	6	4.29114	4.44082	14.9667
JU561	6	3.76355	3.6549	10.8035
JU561	6	3.96106	4.16743	12.9649
JU561	6	3.89729	3.76355	11.5199
JU561	6	4.31136	4.10425	13.8976
JU561	7	3.84946	3.69933	11.1844
JU561	7	4.22205	3.97199	13.1711
JU561	7	3.8096	3.45886	10.3491
JU561	7	4.02926	3.97479	12.5785
JU561	7	3.6459	3.77226	10.8018
JU561	7	3.9001	3.48396	10.6718
JU561	7	3.87485	3.59482	10.9401
JU561	7	3.8096	3.93065	11.7607
JU561	7	3.69048	3.54906	10.2869
JU561	8	3.76355	3.63099	10.7328
JU561	8	3.69048	3.60382	10.4457
JU561	8	4.17791	4.1016	13.4587
JU561	8	2.94131	2.98899	6.90486
JU561	8	4.02926	3.76355	11.91
JU561	8	3.48396	3.48396	9.53313
JU561	8	3.73447	3.73742	10.962
JU561	8	3.60382	3.3694	9.53689
JU561	8	3.3173	3.3173	8.64287
JU561	8	3.55511	3.39849	9.48917
JU561	8	3.8096	3.93065	11.7607
JU561	8	3.57341	3.44617	9.67185
JU561	8	3.70229	3.61888	10.5229
JU561	8	3.60382	3.60382	10.2004
JU561	8	4.10425	3.98852	12.8569
JU561	8	3.69048	3.6549	10.5937
JU561	9	3.82953	3.70229	11.1354
JU561	9	3.59482	3.3173	9.36593
JU561	9	3.89729	3.6459	11.1598
JU561	9	3.6459	3.66671	10.4995
JU561	9	3.23758	3.10354	7.89166
JU561	9	3.63099	3.43347	9.79147
JU561	9	3.30681	3.45886	8.98324
JU561	9	3.69048	3.96652	11.4969
JU561	9	4.13599	4.28095	13.9062
JU561	9	3.96106	3.97479	12.3656
JU561	9	3.6459	3.63099	10.3973
JU561	10	3.57046	3.57046	10.0124
JU561	10	2.78528	2.64076	5.77679
JU561	10	3.3694	3.45886	9.15327
JU561	10	3.44307	3.3173	8.97056
JU561	10	3.93065	3.9001	12.0401
JU561	10	4.44082	4.15961	14.5079
JU561	10	3.44307	3.48396	9.42124
JU561	10	3.6549	3.54906	10.1878
JU561	10	3.60382	3.5213	9.96683
JU561	10	3.19344	3.1592	7.92365
JU561	10	3.87485	3.76355	11.4536
JU561	10	3.44307	3.39849	9.19011
JU561	10	4.44082	4.25025	14.8241
JU561	10	3.89729	3.69048	11.2963
JU561	10	3.24083	2.91149	7.41074
JU561	10	3.3663	3.39849	8.98522
JU561	10	4.01568	3.93065	12.3969
JU561	10	3.6459	3.5213	10.0832
JU561	10	4.02926	3.98852	12.622
JU561	10	3.23758	3.37265	8.57595
JU561	11	3.70229	3.73447	10.859
JU561	11	4.09362	3.92239	12.611
JU561	11	3.6459	3.73447	10.6936
JU561	11	3.224	3.40808	8.62968
JU561	11	3.69933	3.4996	10.1679
JU561	11	4.38163	3.72576	12.8215
JU561	11	3.43347	3.40808	9.19037
JU561	11	3.65195	3.61888	10.3798
JU561	11	3.63099	3.89729	11.1142
JU561	12	3.23758	3.12805	7.95397
JU561	12	2.77347	2.95238	6.4311
JU561	12	2.5823	3.03962	6.16476
JU561	12	2.98899	3.11402	7.31032
JU561	12	3.04331	2.80092	6.69481
JU561	12	3.39849	3.19344	8.52382
JU561	12	3.57341	3.5213	9.88273
JU561	12	4.22722	3.96106	13.1509
CX11285	1	3.08243	3.2677	7.91089
CX11285	1	3.84946	3.9001	11.7914
CX11285	1	4.48969	4.45071	15.6941
CX11285	1	4.51626	4.37159	15.5063
CX11285	1	3.3173	3.61888	9.42862
CX11285	1	3.5089	3.7169	10.2434
CX11285	1	4.54755	4.17526	14.9125
CX11285	1	4.51626	4.78109	16.9588
CX11285	1	3.84946	4.35919	13.1794
CX11285	1	4.30383	4.40392	14.8862
CX11285	1	4.06159	4.11222	13.1179
CX11285	2	3.65652	3.2677	9.38426
CX11285	2	4.34162	3.92239	13.375
CX11285	2	4.01022	3.69343	11.6329
CX11285	2	4.42857	4.19607	14.5947
CX11285	2	4.083	4.01568	12.8774
CX11285	2	3.97199	4.01568	12.5273
CX11285	2	3.44617	3.78082	10.2332
CX11285	2	3.96652	3.87485	12.0713
CX11285	2	3.93892	3.59482	11.121
CX11285	2	3.24762	3.39849	8.66843
CX11285	2	3.76355	3.97479	11.749
CX11285	2	4.17791	4.05347	13.3008
CX11285	3	4.02926	3.3173	10.4978
CX11285	3	3.5089	3.56736	9.83125
CX11285	3	3.44307	3.3694	9.11147
CX11285	3	3.77226	3.39849	10.0688
CX11285	3	3.72576	3.5213	10.3041
CX11285	3	4.16743	3.76355	12.3184
CX11285	3	3.57046	3.44307	9.65517
CX11285	3	3.96106	3.97479	12.3656
CX11285	3	4.3617	4.03192	13.812
CX11285	3	3.60382	3.3694	9.53689
CX11285	3	3.12805	3.11402	7.65042
CX11285	3	3.6459	3.5213	10.0832
CX11285	3	3.63099	3.43347	9.79147
CX11285	3	3.84946	3.6459	11.0229
CX11285	4	3.57046	3.0718	8.61406
CX11285	4	3.27773	3.6459	9.38572
CX11285	4	3.03962	2.83945	6.77867
CX11285	4	3.6459	3.4996	10.021
CX11285	4	3.37265	3.8381	10.1666
CX11285	4	3.82953	3.8381	11.5439
CX11285	4	4.22973	3.89729	12.9469
CX11285	4	4.30383	3.84946	13.012
CX11285	4	3.72576	3.57046	10.4479
CX11285	4	4.46282	4.25792	14.9244
CX11285	4	4.10425	3.55511	11.4598
CX11285	4	4.30383	4.1016	13.8643
CX11285	5	3.93065	3.4996	10.8037
CX11285	5	3.89729	3.72576	11.4043
CX11285	5	3.25101	2.78528	7.11176
CX11285	5	3.43347	3.12805	8.43523
CX11285	5	3.97479	4.10425	12.8126
CX11285	5	3.44307	3.5213	9.52224
CX11285	5	3.97479	3.6459	11.3817
CX11285	5	4.22205	4.42857	14.6851
CX11285	5	3.63099	4.1016	11.6968
CX11285	5	4.40392	4.22205	14.6034
CX11285	5	4.083	4.22205	13.5392
CX11285	5	3.72576	3.60382	10.5455
CX11285	6	3.60382	3.3694	9.53689
CX11285	6	3.87485	3.44617	10.4877
CX11285	6	3.72576	3.27773	9.59131
CX11285	6	3.93065	3.60382	11.1255
CX11285	6	3.8096	3.24083	9.69674
CX11285	6	4.13599	3.72576	12.1027
CX11285	6	3.93065	3.60382	11.1255
CX11285	6	3.9001	3.77226	11.5549
CX11285	6	4.01568	4.01568	12.6651
CX11285	6	4.22722	4.29114	14.2468
CX11285	6	3.84946	3.44307	10.4096
CX11285	7	4.22973	3.9001	12.9562
CX11285	7	4.37735	4.43108	15.2339
CX11285	7	4.17791	4.20124	13.7856
CX11285	7	3.76355	4.06159	12.0056
CX11285	7	3.97479	3.57046	11.1462
CX11285	7	3.11402	3.03962	7.43416
CX11285	7	3.89729	3.9001	11.9379
CX11285	7	4.50666	4.22722	14.9623
CX11285	7	4.63539	4.55951	16.5995
CX11285	7	4.30383	4.22973	14.2974
CX11285	7	3.84946	3.9001	11.7914
CX11285	7	4.13599	3.89729	12.66
CX11285	8	4.31136	4.28095	14.4959
CX11285	8	3.8096	3.69933	11.0686
CX11285	8	4.30383	4.49692	15.2006
CX11285	8	3.97479	3.69933	11.5486
CX11285	8	4.15961	4.15961	13.5892
CX11285	8	4.35919	4.3617	14.9332
CX11285	8	3.76355	3.69048	10.9086
CX11285	8	4.30383	4.22973	14.2974
CX11285	8	3.82953	4.29114	12.9065
CX11285	8	4.09362	4.16743	13.3988
CX11285	8	4.15961	3.97479	12.9854
CX11285	8	4.48969	3.97479	14.0159
CX11285	8	4.55951	4.01568	14.3803
CX11285	9	4.34162	4.54755	15.5067
CX11285	9	4.42857	4.31136	14.9957
CX11285	9	4.05347	3.84946	12.2551
CX11285	9	4.16743	3.97479	13.0099
CX11285	9	4.09362	3.97479	12.7794
CX11285	9	4.46282	4.38163	15.358
CX11285	9	4.63302	4.65428	16.9359
N2	1	3.224	3.43347	8.69397
N2	1	4.16743	4.19873	13.7428
N2	1	4.44082	4.52836	15.7941
N2	1	3.86363	3.89729	11.8263
N2	1	4.10425	4.1016	13.2214
N2	1	4.1016	4.01568	12.9361
N2	1	3.9001	3.89729	11.9379
N2	1	3.44307	3.39849	9.19011
N2	1	3.47451	3.57046	9.74334
N2	1	3.44307	3.3663	9.10309
N2	1	3.60382	3.89729	11.031
N2	1	4.52836	4.38901	15.6098
N2	1	3.69933	4.01568	11.6674
N2	1	4.46282	4.42857	15.5225
N2	1	4.75363	4.42857	16.534
N2	1	4.13333	4.13599	13.4267
N2	1	4.25025	4.06159	13.5581
N2	1	4.25792	4.01568	13.4291
N2	1	4.3617	4.48969	15.3802
N2	1	3.97479	3.77226	11.7762
N2	1	3.96106	3.96106	12.3229
N2	1	4.11222	4.15695	13.4258
N2	1	4.25025	4.20124	14.0243
N2	1	3.87485	4.01568	12.2209
N2	1	3.69933	3.6459	10.593
N2	2	4.22973	4.083	13.5638
N2	2	3.83249	3.73447	11.2408
N2	2	4.35919	4.22973	14.4813
N2	2	4.44082	4.52836	15.7941
N2	2	4.29867	4.11754	13.9015
N2	2	4.02926	4.22973	13.3853
N2	2	4.15961	4.1016	13.3997
N2	2	3.76355	3.7169	10.9867
N2	2	4.66816	4.4823	16.4338
N2	3	5.14984	5.11795	20.7004
N2	3	4.48969	4.15695	14.6582
N2	3	4.52836	4.8084	17.1014
N2	3	4.71687	4.4237	16.3881
N2	3	5.01905	4.76057	18.7659
N2	3	4.83556	4.66816	17.7289
N2	3	4.34162	4.48969	15.3094
N2	3	4.70993	4.38163	16.2084
N2	3	4.49943	4.38399	15.4923
N2	3	4.22973	3.97479	13.2043
N2	3	4.81976	4.63302	17.538
N2	4	3.6459	3.69933	10.593
N2	4	4.3617	4.20124	14.3921
N2	4	3.57046	3.55511	9.96936
N2	4	4.46769	4.29114	15.0572
N2	4	4.29867	4.02926	13.6035
N2	4	4.62121	4.76972	17.3117
N2	4	4.38163	4.15961	14.3146
N2	4	4.57855	4.58328	16.4814
N2	4	4.15695	3.70229	12.0875
N2	4	3.97479	4.01568	12.5361
N2	4	5.2421	4.73296	19.4862
N2	4	3.9001	3.82953	11.7303
N2	4	4.083	3.98852	12.7903
N2	4	4.15695	4.15695	13.5719
N2	4	5.38765	5.75714	24.3611
N2	5	4.44082	4.19873	14.6444
N2	5	3.73447	3.69048	10.8243
N2	5	3.70229	3.98852	11.5977
N2	5	3.7169	3.55511	10.3782
N2	5	2.98899	3.92239	9.20799
N2	5	3.30091	3.54906	9.20103
N2	5	4.19873	4.13599	13.6391
N2	5	3.3694	3.6459	9.64822
N2	5	4.06159	4.083	13.0246
N2	5	3.93892	4.37159	13.524
N2	5	3.57046	3.8381	10.7629
N2	5	4.01022	4.43846	13.9795
N2	5	3.88327	4.13599	12.6144
N2	6	4.02926	3.93065	12.4388
N2	6	3.90836	3.97479	12.2011
N2	6	3.83249	3.96106	11.9229
N2	6	3.98571	4.01022	12.5535
N2	6	4.02926	3.69343	11.6881
N2	6	4.32155	4.54755	15.435
N2	6	4.26058	3.79529	12.7
N2	6	3.99664	3.26105	10.2363
N2	6	4.11222	3.87485	12.5147
N2	6	4.37159	4.29867	14.7592
N2	6	4.11222	4.19873	13.5608
N2	6	4.083	3.86363	12.3898
N2	6	4.05598	3.88327	12.3704
N2	7	3.76355	3.86363	11.4204
N2	7	4.34413	4.44082	15.1515
N2	7	4.90715	4.66816	17.9914
N2	7	4.58328	4.48969	16.1615
N2	7	4.76972	4.16743	15.6117
N2	7	3.9001	3.69933	11.3315
N2	7	4.02926	4.16743	13.1882
N2	7	4.58328	4.83556	17.4065
N2	7	4.52836	4.72617	16.8089
N2	7	4.54755	4.22722	15.0981
N2	8	4.01022	4.45071	14.0181
N2	8	4.48969	3.98571	14.0544
N2	8	4.40392	4.43846	15.3519
N2	8	4.72617	4.76514	17.6879
N2	8	4.03192	4.20124	13.3039
N2	8	4.34413	4.19873	14.3255
N2	8	4.09362	3.82953	12.3124
N2	8	3.97479	3.44617	10.7582
N2	8	3.54906	3.78377	10.547
N2	8	4.14381	4.30383	14.007
N2	9	4.22722	3.76355	12.4952
N2	9	4.09362	3.76355	12.1003
N2	9	4.03192	3.6459	11.5453
N2	9	3.34682	3.3663	8.84862
N2	9	3.43347	3.56736	9.6199
N2	9	3.6459	3.70229	10.6014
N2	9	3.93892	4.01022	12.4061
N2	9	3.73742	4.01022	11.7714
N2	9	3.90836	3.54906	10.8943
N2	9	3.88327	3.98571	12.1561
N2	9	3.27773	3.8381	9.88051
N2	9	3.83249	4.19873	12.6383
N2	9	3.7169	4.13333	12.0662
N2	9	4.26058	3.97479	13.3007
N2	9	4.22722	4.01022	13.3141
N2	9	4.22722	4.05347	13.4577
N2	9	3.84946	3.8381	11.6039
CB4856	1	4.09362	4.01568	12.9109
CB4856	1	4.35919	4.49943	15.4047
CB4856	1	4.11754	4.44082	14.3612
CB4856	1	3.43347	3.77226	10.1724
CB4856	1	3.5213	3.78082	10.4563
CB4856	1	4.29114	4.083	13.7607
CB4856	1	4.34162	4.083	13.9226
CB4856	1	4.26058	4.26058	14.257
CB4856	1	3.97479	4.11222	12.8375
CB4856	1	4.14381	3.99664	13.0072
CB4856	1	3.90836	3.7169	11.4095
CB4856	1	4.20124	4.11222	13.5689
CB4856	2	3.97479	4.083	12.7463
CB4856	2	4.99513	4.52836	17.7655
CB4856	2	4.88929	4.49692	17.2683
CB4856	3	3.70229	3.69048	10.7311
CB4856	3	3.87485	4.05347	12.3359
CB4856	3	4.43108	3.84946	13.3968
CB4856	3	3.8381	4.17791	12.594
CB4856	3	4.29114	4.46282	15.0408
CB4856	3	4.55951	4.50666	16.1385
CB4856	3	4.22722	4.25792	14.1365
CB4856	3	3.70229	3.69933	10.7568
CB4856	3	4.28346	4.19873	14.1255
CB4856	3	4.88708	5.03853	19.3394
CB4856	3	5.23575	4.81976	19.8196
CB4856	3	3.44307	3.77226	10.2009
CB4856	3	3.90836	3.47451	10.6654
CB4856	3	4.03192	3.44307	10.903
CB4856	4	4.57855	4.69133	16.87
CB4856	4	4.05347	3.65195	11.6263
CB4856	4	4.75363	4.83556	18.0535
CB4856	4	4.25025	4.44082	14.8241
CB4856	4	3.89729	3.97479	12.1665
CB4856	4	3.3694	3.5213	9.31851
CB4856	4	4.15695	4.34413	14.183
CB4856	4	4.26058	4.13599	13.8401
CB4856	4	4.11754	3.87485	12.5309
CB4856	5	4.38901	4.52836	15.6098
CB4856	5	4.63302	4.66816	16.9863
CB4856	5	3.77226	3.6459	10.8018
CB4856	5	4.44082	4.58328	15.9856
CB4856	5	4.22722	4.11754	13.6704
CB4856	5	4.15961	4.25792	13.9104
CB4856	5	4.78109	3.99664	15.0076
CB4856	5	3.65195	3.42402	9.8209
CB4856	5	4.8422	4.31136	16.3963
CB4856	5	3.45561	3.17986	8.63025
CB4856	6	4.44082	4.55715	15.8945
CB4856	6	4.69133	4.87143	17.9491
CB4856	6	4.63539	4.02926	14.669
CB4856	6	4.40392	4.48969	15.5291
CB4856	6	4.51626	4.43846	15.7435
CB4856	6	3.97479	4.17526	13.0343
CB4856	6	4.57855	4.62358	16.6263
CB4856	6	4.69133	4.44082	16.3625
CB4856	6	4.44629	4.34413	15.1702
CB4856	6	4.29867	3.89729	13.1579
CB4856	6	4.34162	4.20124	14.3258
CB4856	7	4.38901	4.34413	14.9747
CB4856	7	4.63539	4.28095	15.5853
CB4856	7	3.83249	4.30383	12.9547
CB4856	7	4.3617	4.17791	14.3122
CB4856	7	4.61413	4.83556	17.5237
CB4856	7	3.97479	4.083	12.7463
CB4856	7	4.15695	3.43347	11.2098
CB4856	7	4.57855	4.11222	14.7875
CB4856	7	4.46282	3.97199	13.9222
CB4856	7	4.01568	3.97479	12.5361
CB4856	7	4.51626	4.48969	15.9252
CB4856	7	3.98571	3.57046	11.1769
CB4856	7	4.43108	4.18057	14.5491
CB4856	8	4.46769	4.28346	15.0303
CB4856	8	3.44617	3.45561	9.35301
CB4856	8	4.42857	3.98571	13.8631
CB4856	8	3.90836	4.02926	12.3683
CB4856	8	4.57855	4.02926	14.4892
CB4856	8	4.02926	4.28346	13.5553
CB4856	8	3.8409	3.99664	12.0564
CB4856	8	4.32155	4.72617	16.0413
CB4856	8	3.73934	3.57046	10.486
CB4856	8	3.54286	3.76355	10.4723
CB4856	8	3.92239	3.93892	12.1344
CB4856	9	3.78377	4.30383	12.79
CB4856	9	4.37159	4.42857	15.2052
CB4856	9	4.01568	4.26058	13.4375
CB4856	9	4.26058	4.44082	14.8601
CB4856	9	4.15695	3.86363	12.6142
CB4856	9	3.8409	3.8096	11.4922
CB4856	10	3.89729	3.82953	11.7219
CB4856	10	4.76057	4.29114	16.0443
CB4856	10	3.8409	3.73742	11.2744
CB4856	10	3.90836	3.79529	11.6501
CB4856	10	4.11222	4.16743	13.4597
CB4856	10	5.2917	5.0902	21.1553
CB4856	10	3.73742	3.69343	10.8416
CB4856	10	3.5089	3.57046	9.83979
CB4856	10	4.28346	4.11754	13.8523
CB4856	10	4.43846	3.54286	12.3503
CB4856	10	4.32155	4.14381	14.0647
CB4856	10	3.8409	3.69343	11.1417
CB4856	11	3.89729	4.15961	12.7323
CB4856	11	3.96106	3.76355	11.7084
CB4856	11	3.87485	4.11754	12.5309
CB4856	11	4.1016	3.89729	12.5547
CB4856	11	4.46282	4.49943	15.7709
CB4856	11	3.88327	3.98852	12.1646
CB4856	11	3.69048	3.79529	11.0006
CB4856	11	4.4823	4.06159	14.2984
CB4856	11	3.65195	3.79529	10.8858
CB4856	11	4.22722	4.01568	13.3323
CB4856	11	4.38901	4.4823	15.451
CB4856	11	3.69933	3.9001	11.3315
CB4856	12	4.42857	4.01022	13.9483
CB4856	12	4.75363	4.63302	17.2974
CB4856	12	3.12805	3.04331	7.4767
CB4856	12	4.38163	4.38901	15.104
CB4856	12	3.84946	3.98852	12.0587
CB4856	12	4.29867	4.11754	13.9015
CB4856	12	4.3617	4.76972	16.3395
CB4856	12	4.61413	4.15695	15.0645
CB4856	12	3.6459	3.4996	10.021
CB4856	12	3.88327	3.76355	11.4785
CB4856	12	4.28346	3.8381	12.9122
CB4856	12	4.17526	3.73742	12.2559
CB4856	12	2.98899	3.224	7.56849
CB4856	12	3.73447	3.59482	10.5438
CB4856	12	3.56736	3.66671	10.2734
CB4856	12	4.09362	4.01568	12.9109
CB4856	12	2.97083	2.5823	6.02525
CB4856	12	4.92708	4.14381	16.0354
CB4856	12	3.27773	3.26105	8.39501
CB4856	12	4.20124	4.09362	13.5075
CB4856	12	4.83556	4.30383	16.3453
CB4856	12	4.02926	3.8096	12.0558
CB4856	12	4.02926	4.10425	12.9882
CB4856	12	3.04331	3.24083	7.74627
CB4856	12	4.01568	4.07222	12.8434
CB4856	12	3.97479	3.72576	11.631
CB4856	12	3.39849	3.78082	10.0916
CB4856	13	4.15961	4.15961	13.5892
CB4856	13	4.68912	4.49692	16.5614
CB4856	13	3.97479	4.35919	13.6085
CB4856	13	4.30383	4.20124	14.2011
CB4856	13	4.02926	3.69933	11.7068
CB4856	13	4.02926	3.77226	11.9376
CB4856	13	3.69048	3.45561	10.0161
CB4856	13	3.40808	3.39849	9.09673
CB4856	13	3.99664	3.54596	11.1306
EG4946	1	4.083	4.26058	13.6627
EG4946	1	3.57046	4.09362	11.4795
EG4946	1	4.63302	4.11222	14.9634
EG4946	1	3.24083	3.3663	8.56839
EG4946	1	3.77226	3.63099	10.7576
EG4946	1	3.65195	3.30091	9.46778
EG4946	1	3.43347	3.70229	9.98374
EG4946	2	3.87485	4.25025	12.9348
EG4946	2	4.34162	4.25792	14.5191
EG4946	2	4.29114	4.43108	14.9339
EG4946	2	3.77226	3.78082	11.2015
EG4946	2	3.1592	3.19344	7.92365
EG4946	2	4.22973	4.57855	15.21
EG4946	2	4.61177	4.50666	16.3235
EG4946	2	4.51862	4.35919	15.4704
EG4946	3	4.79024	4.69842	17.6766
EG4946	3	5.23575	5.23575	21.5302
EG4946	3	4.34162	4.51626	15.4
EG4946	3	3.69933	3.6459	10.593
EG4946	3	3.66671	3.60382	10.3784
EG4946	3	3.5213	3.3173	9.1744
EG4946	3	3.89729	3.69048	11.2963
EG4946	4	3.55511	3.16953	8.84988
EG4946	4	3.43347	3.30091	8.90137
EG4946	4	3.44307	3.27773	8.86358
EG4946	4	3.24083	3.19344	8.1284
EG4946	4	3.3663	3.34682	8.84862
EG4946	4	3.23758	2.70999	6.89094
EG4946	4	3.43347	3.57046	9.62826
EG4946	4	3.3694	3.48396	9.21968
EG4946	4	3.39849	3.19344	8.52382
EG4946	4	3.69933	3.4996	10.1679
EG4946	4	3.3694	3.23758	8.56769
EG4946	4	3.5213	3.57341	9.88273
EG4946	4	3.8381	3.83249	11.5528
EG4946	4	3.76355	3.43347	10.1489
EG4946	4	3.11402	2.98899	7.31032
EG4946	4	3.11402	2.98899	7.31032
EG4946	4	3.97479	4.05347	12.6541
EG4946	4	3.5213	3.39849	9.39894
EG4946	4	3.6549	3.1592	9.06863
EG4946	4	3.48396	3.69048	10.0982
EG4946	4	3.3694	3.24083	8.57628
EG4946	4	3.37265	3.16953	8.39568
EG4946	4	3.23758	3.17986	8.08572
EG4946	4	4.10425	3.78082	12.1874
EG4946	4	4.19607	3.86363	12.7329
EG4946	4	3.02885	2.93009	6.97025
EG4946	4	3.57046	3.3173	9.30247
EG4946	4	3.72576	3.27773	9.59131
EG4946	4	3.89729	3.86363	11.8263
EG4946	4	3.3663	3.48396	9.2112
EG4946	4	3.55511	3.23758	9.0399
EG4946	5	3.3663	3.37162	8.91419
EG4946	5	3.16953	3.2677	8.13441
EG4946	5	3.8096	3.3173	9.92554
EG4946	5	3.19344	3.55511	8.91666
EG4946	5	3.44617	4.07222	11.0219
EG4946	5	3.34018	3.13144	8.21493
EG4946	5	4.18057	4.28095	14.0561
EG4946	5	3.76355	4.13599	12.2255
EG4946	5	3.69933	3.57046	10.3738
EG4946	5	3.78082	3.57046	10.6023
EG4946	5	3.0718	3.5213	8.49546
EG4946	5	3.69048	3.60382	10.4457
EG4946	5	4.30383	3.87485	13.0979
EG4946	6	3.98852	3.76355	11.7896
EG4946	6	4.31136	4.19607	14.2085
EG4946	6	3.60382	4.22205	11.9503
EG4946	6	3.76355	3.75779	11.1076
EG4946	6	4.22205	3.98852	13.2259
EG4946	6	3.87485	3.55511	10.8193
EG4946	6	4.48969	4.38163	15.4505
EG4946	6	4.54755	3.98852	14.2456
EG4946	6	3.77226	3.72576	11.0384
EG4946	6	4.25792	4.25792	14.2392
EG4946	6	3.54906	3.34682	9.329
EG4946	6	3.87485	3.76355	11.4536
EG4946	6	4.30383	4.05347	13.7016
EG4946	6	4.38901	3.87485	13.3571
EG4946	6	3.9001	3.24083	9.92707
EG4946	6	3.72576	3.25101	9.51313
EG4946	6	4.16743	4.25792	13.9366
EG4946	7	3.0718	2.97083	7.1674
EG4946	7	2.95238	3.3173	7.69213
EG4946	7	3.0718	3.11402	7.51286
EG4946	7	3.13838	3.27773	8.07921
EG4946	7	3.63099	3.48396	9.93544
EG4946	7	2.72195	2.97083	6.35109
EG4946	7	2.83561	2.97083	6.6163
EG4946	7	2.64076	2.52251	5.23181
EG4946	7	2.95238	3.13144	7.26117
EG4946	7	4.01568	3.93065	12.3969
EG4946	8	3.84946	3.84946	11.6383
EG4946	8	3.76355	3.84946	11.3786
EG4946	8	4.38163	4.43108	15.2488
EG4946	8	3.69933	3.63099	10.5496
EG4946	8	3.87485	3.55511	10.8193
EG4946	8	3.34018	4.49692	11.7971
EG4946	8	4.75363	4.17954	15.6043
EG4946	8	4.29114	4.02926	13.5796
EG4946	8	3.57046	3.63099	10.1821
EG4946	8	3.69933	3.6459	10.593
EG4946	8	3.3694	3.82953	10.1342
EG4946	8	3.84946	3.72576	11.2643
EG4946	8	3.92239	3.4996	10.781
EG4946	8	4.29114	3.69933	12.4677
EG4946	8	3.89729	3.8096	11.6609
EG4946	8	3.93065	3.69048	11.393
EG4946	8	4.50666	4.66816	16.5231
EG4946	8	4.1016	3.72576	12.0021
EG4946	8	4.38163	4.35919	15.0014
EG4946	8	4.76057	4.88708	18.2725
EG4946	8	3.89729	4.10425	12.5628
EG4946	8	4.09362	3.97479	12.7794
EG4946	8	3.72576	3.89729	11.4043
EG4946	8	3.66671	3.78082	10.8881
EG4946	8	3.93065	3.72576	11.5019
EG4946	8	3.16953	3.43347	8.54708
EG4946	8	3.96106	3.56736	11.0981
EG4946	8	4.75363	4.40392	16.442
EG4946	8	4.25792	3.72576	12.4595
EG4946	8	3.96106	3.96106	12.3229
EG4946	8	2.97083	3.4996	8.16558
EG4946	8	3.24083	3.69933	9.41606
JU782	1	3.13838	3.04331	7.5014
JU782	1	3.3173	3.6459	9.49901
JU782	1	3.6459	3.8096	10.9087
JU782	1	4.05347	4.09362	13.0324
JU782	2	4.17791	4.50666	14.7878
JU782	2	3.72576	3.69048	10.7991
JU782	2	3.3663	3.1592	8.35256
JU782	2	4.63539	4.54755	16.5559
JU782	2	4.25792	4.083	13.6542
JU782	2	4.10425	3.86363	12.4543
JU782	2	2.86617	2.86617	6.452
JU782	2	4.54755	4.51862	16.1389
JU782	2	4.48969	4.69133	16.5425
JU782	2	3.44307	3.48396	9.42124
JU782	3	4.63302	4.38163	15.9437
JU782	3	5.03853	5.03853	19.9388
JU782	3	4.17791	4.58564	15.047
JU782	3	4.73296	4.29114	15.9513
JU782	3	3.59172	3.42402	9.65893
JU782	3	4.05347	4.15695	13.234
JU782	3	4.34162	4.40392	15.0169
JU782	3	4.4237	4.02926	13.9991
JU782	3	4.11222	4.11222	13.2814
JU782	3	3.19344	3.0718	7.70447
JU782	3	3.75779	3.96652	11.7066
JU782	3	4.22205	4.22205	14.0003
JU782	4	4.46282	4.19607	14.7076
JU782	4	4.97417	4.76057	18.5981
JU782	4	5.01905	4.95129	19.5177
JU782	4	4.34162	4.40392	15.0169
JU782	4	3.72576	3.27773	9.59131
JU782	5	4.12477	3.45561	11.1948
JU782	5	2.66128	3.16953	6.62483
JU782	5	3.23758	3.37265	8.57595
JU782	5	3.04331	3.23758	7.73851
JU782	5	3.01084	3.13144	7.40494
JU782	5	2.61581	2.66128	5.46746
JU782	5	3.56736	3.3694	9.4404
JU782	5	4.01568	4.01568	12.6651
JU782	5	3.30091	3.69933	9.59063
JU782	6	4.54755	4.25025	15.1804
JU782	6	3.69048	3.65195	10.5851
JU782	6	4.06159	4.09362	13.0585
JU782	6	3.9001	4.16743	12.7654
JU782	6	3.40808	3.73447	9.99605
JU782	6	3.55511	3.8409	10.7245
JU782	6	4.02926	4.44082	14.0533
JU782	6	3.97479	3.8381	11.9817
JU782	6	4.11222	4.15961	13.4344
JU782	6	4.02926	3.92239	12.4127
JU782	6	3.78377	3.79529	11.2787
JU782	7	3.87485	4.01568	12.2209
JU782	7	4.22722	4.17526	13.8621
JU782	7	4.11754	4.26058	13.7783
JU782	7	3.93065	3.84946	11.8838
JU782	7	3.37265	3.59482	9.52223
JU782	7	3.77226	4.17791	12.378
JU782	7	3.6549	3.44617	9.8924
JU782	7	4.1016	4.28361	13.7992
JU782	7	4.09362	4.29114	13.7965
JU782	7	3.78377	3.69933	10.9936
JU782	7	3.6459	3.77226	10.8018
JU782	7	3.39849	3.45886	9.23227
JU782	7	3.8096	3.69048	11.0421
JU782	7	3.96106	4.03192	12.5433
JU782	7	4.3617	4.3617	14.9417
JU782	7	3.30091	3.3173	8.60018
JU782	7	3.3173	3.78377	9.85823
JU782	7	4.16743	4.16743	13.6404
JU782	7	4.11222	4.09362	13.2213
JU782	7	4.90715	4.50666	17.369
JU782	8	4.43846	4.32155	15.0647
JU782	8	3.88327	3.86363	11.7837
JU782	8	4.11754	4.76514	15.41
JU782	8	4.57855	4.76972	17.1518
JU782	8	4.42857	4.38163	15.2401
JU782	8	4.30383	4.01568	13.5739
JU782	8	3.87485	3.89729	11.8606
JU782	8	4.54755	4.50666	16.0962
JU782	8	4.06159	4.06159	12.9563
JU782	8	4.3617	4.22722	14.4811
JU782	8	4.22973	3.9001	12.9562
JU782	8	4.34162	4.17791	14.2463
JU782	8	3.69933	4.15961	12.0855
JU782	8	4.3617	4.38901	15.0353
JU782	9	4.22722	4.22973	14.0429
JU782	9	3.98852	4.45071	13.9422
JU782	9	4.62358	4.72617	17.1624
JU782	9	4.88708	5.02126	19.2731
JU782	9	4.90715	4.57855	17.6461
JU782	9	3.13838	3.6459	8.98669
JU782	9	4.02926	3.83249	12.1282
JU782	9	4.34162	4.01022	13.6745
JU782	9	4.22722	3.7169	12.3403
JU782	9	4.34413	4.37159	14.9153
JU782	9	3.47451	3.224	8.79789
JU782	9	4.37159	4.40392	15.1206
JU782	9	3.82953	3.77226	11.3458
JU782	9	3.97479	3.93065	12.2707
JU782	9	3.92239	3.92239	12.0834
JU782	9	4.38163	4.46282	15.358
JU782	9	4.11222	4.25025	13.7272
JU782	9	3.76355	3.90836	11.5527
JU782	9	3.69933	3.69048	10.7225
JU782	9	3.3173	3.224	8.3998
JU782	9	4.87364	4.79024	18.3358
JU782	10	4.48969	4.19873	14.8055
JU782	10	4.01022	4.32155	13.6112
JU782	10	4.54755	4.29114	15.3264
JU782	10	4.20124	4.20124	13.8626
JU782	10	3.99664	3.98852	12.5198
JU782	10	4.14381	4.58564	14.9242
JU782	10	4.28095	4.14381	13.9325
JU782	10	4.48969	4.82655	17.0193
JU782	10	3.8381	3.98571	12.0147
JU782	10	3.8409	3.69048	11.1328
JU782	10	4.1016	4.05347	13.0578
JU782	10	4.29114	4.07606	13.7373
JU782	10	4.06159	4.11222	13.1179
JU782	10	4.35919	4.22722	14.4727
JU782	10	4.55715	4.44082	15.8945
JU782	10	4.25025	3.97479	13.2684
JU782	10	4.3617	4.25025	14.56
JU782	10	4.34162	3.97479	13.5537
JU782	10	4.66816	4.34162	15.918
JU782	10	4.4237	4.4237	15.3696
JU782	10	4.63539	4.63539	16.8757
JU782	10	4.22722	4.02926	13.3774
JU782	10	4.11222	3.89729	12.5872
JU782	10	3.72576	3.77226	11.0384
JU782	10	3.97479	3.59482	11.2223
JU782	10	4.26058	4.26058	14.257
JU782	10	4.05347	4.083	12.9986
JU782	10	3.98852	3.69343	11.5699
JU782	10	4.083	4.01022	12.8599
JU782	10	4.4823	4.11754	14.4954
JU393	1	4.10425	3.69048	11.8961
JU393	1	3.48396	4.28095	11.7139
JU393	1	3.34682	3.23758	8.51026
JU393	1	3.13838	3.44617	8.49438
JU393	1	3.75779	3.3663	9.93518
JU393	1	3.34682	3.23758	8.51026
JU393	1	3.3663	3.27773	8.66596
JU393	1	3.66671	3.48396	10.0332
JU393	1	4.22722	4.22722	14.0346
JU393	1	4.15961	4.30383	14.0604
JU393	1	4.22973	3.77226	12.5315
JU393	1	3.60382	3.6459	10.3195
JU393	1	4.30383	3.10354	10.4907
JU393	1	3.84946	3.60382	10.8957
JU393	1	3.72576	3.45886	10.1213
JU393	1	3.6459	3.93065	11.2553
JU393	1	3.6459	3.75779	10.7604
JU393	1	3.97479	3.78082	11.8029
JU393	1	3.93065	3.78082	11.6719
JU393	2	4.02926	3.89729	12.3333
JU393	2	5.20032	5.2917	21.613
JU393	2	4.79024	5.01905	18.8829
JU393	2	3.6459	3.72576	10.6686
JU393	2	4.49692	4.22973	14.9389
JU393	2	3.82953	3.57046	10.7389
JU393	2	4.63302	4.99513	18.1761
JU393	2	4.15695	3.97479	12.9771
JU393	2	3.23758	3.55511	9.0399
JU393	2	3.5213	2.72195	7.52789
JU393	2	4.15961	4.17791	13.649
JU393	2	3.57046	3.84946	10.7948
JU393	2	3.76355	3.84946	11.3786
JU393	2	4.29114	4.28346	14.4363
JU393	2	4.15961	4.05347	13.2425
JU393	2	3.96106	3.19344	9.93484
JU393	2	3.82953	3.8096	11.4582
JU393	2	4.44082	4.11222	14.3427
JU393	2	3.69048	3.59482	10.4196
JU393	2	3.37265	3.16953	8.39568
JU393	2	3.9001	3.69933	11.3315
JU393	2	3.77226	3.45886	10.2477
JU393	2	4.05347	3.8096	12.1282
JU393	2	4.26058	3.78377	12.6615
JU393	2	3.78377	4.11222	12.2206
JU393	2	4.02926	4.17791	13.2213
JU393	2	3.44307	3.23758	8.755
JU393	2	3.6459	3.48396	9.97624
JU393	2	3.48396	4.01568	10.9881
JU393	2	3.77226	3.77226	11.1762
JU393	2	2.97083	3.0718	7.1674
JU393	2	3.69048	2.97083	8.61094
JU393	2	3.56736	3.44307	9.64678
JU393	2	3.33043	2.72195	7.11984
JU393	2	3.6459	3.3173	9.49901
JU393	2	3.97479	3.70229	11.5578
JU393	2	3.6459	3.3694	9.64822
JU393	2	3.76355	3.44307	10.1773
JU393	2	3.57046	3.39849	9.53015
JU393	2	3.6459	3.43347	9.83167
JU393	2	4.30383	4.30383	14.5479
JU393	2	3.30091	3.17986	8.24388
JU393	2	3.70229	3.57046	10.3821
JU393	2	3.57046	3.66671	10.2823
JU393	2	3.93065	3.76355	11.6186
JU393	2	3.57341	3.3663	9.44771
JU393	2	3.69048	3.3663	9.75721
JU393	2	4.15961	3.97479	12.9854
JU393	2	3.54906	3.69933	10.3116
JU393	2	3.97479	3.93065	12.2707
JU393	2	3.44307	3.3173	8.97056
JU393	2	3.63099	3.6459	10.3973
JU393	2	3.40808	2.9078	7.78331
JU393	2	3.57046	3.17986	8.91708
JU393	2	3.47451	3.18665	8.69597
JU393	3	4.86921	4.66816	17.8523
JU393	3	5.6017	4.88708	21.501
JU393	3	4.22973	4.30383	14.2974
JU393	3	3.8096	3.77226	11.2868
JU393	3	4.49692	4.44082	15.6844
JU393	3	4.09362	4.22973	13.5991
JU393	3	3.72576	3.72576	10.9023
JU393	3	4.01568	3.66671	11.5645
JU393	3	4.54755	4.66816	16.673
JU393	3	3.9001	4.22205	12.9327
JU393	3	3.77226	3.89729	11.5466
JU393	3	4.58564	4.58564	16.5154
JU393	3	4.09362	3.8096	12.2484
JU393	4	4.17791	4.05347	13.3008
JU393	4	4.42857	4.19607	14.5947
JU393	4	4.61177	4.59287	16.6357
JU393	4	3.59482	3.3173	9.36593
JU393	4	3.83249	3.76355	11.3284
JU393	4	5.0902	5.13493	20.5286
JU393	4	4.80618	4.61413	17.4173
JU393	4	6.63459	6.53539	34.0546
JU393	4	5.0837	4.95129	19.7692
JU393	4	4.8915	4.72381	18.1478
JU393	4	4.63539	4.32155	15.7331
JU393	4	4.03192	3.76355	11.9179
JU393	4	3.96106	3.72576	11.5909
JU393	4	4.02926	3.96106	12.5351
JU393	5	3.89729	3.77226	11.5466
JU393	5	4.17791	4.19607	13.7687
JU393	5	4.99513	4.90715	19.2516
JU393	5	3.63099	3.44307	9.81883
JU393	5	3.9001	3.30091	10.1111
JU393	5	4.05347	4.083	12.9986
JU393	5	4.90715	4.62358	17.8196
JU393	5	3.70229	3.8409	11.1684
JU393	5	4.46769	4.43846	15.5742
JU393	5	5.23162	4.8084	19.7572
JU393	5	4.15695	4.30383	14.0514
JU393	5	4.11222	3.73447	12.0613
JU393	5	4.34413	4.74448	16.1876
JU393	5	4.76972	4.85578	18.1904
JU393	5	4.88708	4.71687	18.1048
JU393	5	4.75363	4.22973	15.7917
JU393	6	3.57046	3.9001	10.9368
JU393	6	3.78082	3.75779	11.1586
JU393	6	4.48969	4.22722	14.906
JU393	6	4.1016	3.97479	12.8043
JU393	6	3.76355	3.27773	9.6886
JU393	6	4.55715	4.1016	14.6803
JU393	6	3.79529	3.44617	10.2724
JU393	6	3.84946	3.84946	11.6383
JU393	6	3.97479	3.69933	11.5486
JU393	6	4.25792	4.30383	14.3927
JU393	6	3.98852	3.98852	12.4943
JU393	6	3.90836	3.79529	11.6501
JU393	6	5.36728	5.2917	22.3069
JU393	6	4.17791	4.48969	14.7321
JU393	6	5.01905	4.62121	18.2166
JU393	6	3.77226	3.69933	10.9601
JU393	6	3.97199	3.57341	11.1476
JU393	6	5.34898	5.57055	23.4023
JU393	6	4.37159	3.97479	13.6472
JU393	6	4.22973	4.25792	14.1449
JU393	6	5.32255	4.96221	20.7437
JU393	6	5.09876	5.02126	20.1079
JU393	6	4.54755	4.07222	14.5445
JU393	6	5.217	4.96221	20.3323
JU393	6	5.02126	4.75363	18.7468
JU393	7	4.95129	4.62121	17.9707
JU393	7	4.55951	4.11222	14.726
JU393	7	4.52836	4.66816	16.6026
JU393	7	4.49692	4.30383	15.2006
JU393	7	4.61177	3.98852	14.4467
JU393	7	5.11795	4.96015	19.938
JU393	7	5.09876	4.94908	19.8189
JU393	7	4.4237	4.34162	15.0844
JU393	7	4.54755	4.8084	17.1739
JU393	7	4.29114	4.22973	14.2553
JU751	1	4.17791	4.34162	14.2463
JU751	1	4.78109	4.72617	17.747
JU751	1	4.96221	4.9138	19.1506
JU751	1	4.31136	4.18057	14.156
JU751	1	4.54755	4.52836	16.1737
JU751	1	3.70229	3.63099	10.5581
JU751	2	3.73742	3.86363	11.3412
JU751	2	3.73447	3.6459	10.6936
JU751	2	3.69343	3.54286	10.2772
JU751	2	3.65195	3.5089	10.0644
JU751	2	3.98571	3.86363	12.0946
JU751	2	3.83249	3.65195	10.9925
JU751	2	4.46769	4.43108	15.5483
JU751	2	4.44082	4.1016	14.3056
JU751	2	3.93892	3.78377	11.7056
JU751	2	3.59482	3.56736	10.072
JU751	2	3.54596	3.54596	9.87545
JU751	2	3.69933	3.60382	10.4707
JU751	2	3.33043	3.2677	8.54736
JU751	2	3.92239	3.78377	11.6564
JU751	2	3.59482	3.2677	9.22589
JU751	3	3.76355	4.1016	12.1238
JU751	3	3.23758	3.60382	9.16377
JU751	3	3.83249	4.20124	12.6458
JU751	3	3.10354	3.60382	8.78438
JU751	3	3.63099	4.02926	11.4905
JU751	3	4.14381	4.30383	14.007
JU751	3	4.03192	4.09362	12.9631
JU751	3	3.17986	3.224	8.0518
JU751	3	4.19607	3.60382	11.8767
JU751	3	3.93065	3.8096	11.7607
JU751	3	3.97479	3.89729	12.1665
JU751	4	4.44082	4.49692	15.6844
JU751	4	3.5089	3.33043	9.1783
JU751	4	4.15695	4.083	13.3304
JU751	4	4.15695	3.8381	12.5309
JU751	4	3.7169	3.69048	10.7734
JU751	4	3.76355	3.44307	10.1773
JU751	4	5.1243	5.04931	20.3215
JU751	5	3.84946	4.17526	12.6233
JU751	5	4.61413	4.02926	14.6018
JU751	5	3.73742	3.54596	10.4087
JU751	5	3.99664	3.69048	11.5842
JU751	5	3.55511	3.79529	10.5971
JU751	5	4.17526	4.17526	13.6917
JU751	6	3.5089	3.69933	10.1949
JU751	6	3.3663	3.5089	9.27716
JU751	6	3.1558	3.30091	8.1815
JU751	6	3.69048	3.69048	10.6968
JU751	6	3.57046	3.42402	9.60176
JU751	6	4.14381	3.98852	12.9808
JU751	6	3.39849	3.24762	8.66843
JU751	6	2.90027	2.90027	6.60644
JU751	6	3.23758	3.03962	7.72913
JU751	7	3.3663	3.79529	10.0343
JU751	7	3.78377	3.6459	10.8348
JU751	7	3.82953	3.69933	11.1265
JU751	7	3.82953	3.69933	11.1265
JU751	7	4.15695	4.34162	14.1748
JU751	7	3.8096	3.89729	11.6609
JU751	7	3.11402	3.39849	8.31184
JU751	7	3.44307	3.57046	9.65517
JU751	7	3.8096	4.01568	12.0151
JU751	7	4.50666	4.17791	14.7878
JU751	7	3.92239	3.89729	12.0061
JU751	7	3.90836	3.8381	11.7815
JU751	7	4.22722	3.97479	13.1965
JU751	7	3.87485	3.76355	11.4536
JU751	7	3.79529	3.87485	11.5502
JU751	7	4.01568	3.97479	12.5361
JU751	8	3.42402	3.54596	9.53587
JU751	8	2.95607	3.90836	9.07402
JU751	8	3.92239	3.45561	10.6455
JU751	8	3.83249	3.79529	11.4239
JU751	8	4.29114	3.98852	13.4423
JU751	8	3.73742	3.59172	10.543
JU751	8	3.44617	3.5089	9.49725
JU751	8	4.25025	4.25025	14.1879
JU751	9	3.47451	3.40808	9.30022
JU751	9	4.38901	4.30383	14.8358
JU751	9	3.6459	3.3173	9.49901
JU751	9	4.79024	4.8422	18.2175
JU751	9	3.57046	3.3663	9.43991
JU751	9	3.59172	3.47451	9.80135
JU751	9	4.06159	3.89729	12.4322
JU751	9	4.11222	3.96106	12.7932
JU751	9	4.8084	4.71687	17.8133
JU751	10	3.4996	3.60382	9.90541
JU751	10	3.6459	3.30091	9.45209
JU751	10	4.38163	3.97479	13.6785
JU751	10	3.87485	3.8381	11.6805
JU751	10	3.7169	3.8381	11.2043
JU751	10	4.30383	3.99664	13.5095
JU751	10	3.7169	3.8381	11.2043
JU751	10	3.59172	3.44617	9.72139
JU751	10	3.90836	3.5089	10.771
JU751	10	3.44617	3.42402	9.26751
JU751	10	3.39849	3.39849	9.07112
JU751	10	3.88327	4.01022	12.2308
JU1200	1	3.90836	3.93892	12.091
JU1200	1	4.09362	4.22722	13.591
JU1200	1	3.88327	3.76355	11.4785
JU1200	1	3.90836	3.61888	11.1086
JU1200	1	4.66816	4.63302	16.9863
JU1200	1	3.97479	4.20124	13.1154
JU1200	1	3.93892	3.79529	11.7412
JU1200	1	5.26897	5.29997	21.9325
JU1200	2	3.3663	3.79529	10.0343
JU1200	2	3.69933	3.6459	10.593
JU1200	2	3.5089	3.59172	9.89837
JU1200	2	3.4996	3.45886	9.50697
JU1200	2	3.43347	3.5213	9.4957
JU1200	2	4.66107	4.19873	15.3707
JU1200	2	4.17526	4.43846	14.5548
JU1200	2	3.76355	3.59172	10.6167
JU1200	2	4.5976	4.5976	16.6017
JU1200	2	3.8096	4.05347	12.1282
JU1200	2	4.90715	4.85578	18.7145
JU1200	2	3.86363	3.69343	11.2077
JU1200	3	3.76355	3.96106	11.7084
JU1200	3	4.06159	3.89729	12.4322
JU1200	3	3.8409	4.05347	12.2278
JU1200	3	4.42857	4.26058	14.8191
JU1200	3	4.44082	4.52836	15.7941
JU1200	3	4.01022	3.69343	11.6329
JU1200	3	4.57619	4.54755	16.3445
JU1200	4	4.46769	4.43108	15.5483
JU1200	4	4.66107	4.34413	15.903
JU1200	4	3.97479	3.73447	11.6582
JU1200	4	4.61413	4.44082	16.0932
JU1200	4	3.9001	3.69933	11.3315
JU1200	4	3.72576	3.60382	10.5455
JU1200	4	4.02926	3.69048	11.6788
JU1200	4	5.04931	5.04931	20.0241
JU1200	4	3.70229	3.5089	10.2031
JU1200	5	4.26058	4.01568	13.4375
JU1200	5	4.76514	4.54755	17.0194
JU1200	5	4.22722	4.19873	13.94
JU1200	5	4.34413	3.90836	13.3348
JU1200	5	4.51626	4.15961	14.7544
JU1200	5	4.06159	3.92239	12.5123
JU1200	5	3.84946	3.70229	11.1933
JU1200	6	3.76355	4.19873	12.411
JU1200	6	3.73742	3.69048	10.8329
JU1200	6	3.8409	3.93892	11.8823
JU1200	6	3.98852	3.8381	12.0231
JU1200	6	4.20124	4.03192	13.3039
JU1200	7	3.54906	3.69048	10.2869
JU1200	7	3.83249	3.56736	10.7379
JU1200	7	3.78377	3.76355	11.1844
JU1200	7	4.58564	4.43108	15.9588
JU1200	7	3.97479	4.05347	12.6541
JU1200	7	4.14381	3.8409	12.5004
JU1200	7	4.22722	3.97479	13.1965
JU1200	7	4.88043	4.57619	17.5409
JU1200	7	4.51626	4.22722	14.9942
JU1200	7	3.78377	3.6459	10.8348
JU1200	7	3.86363	3.40808	10.3418
JU1200	7	3.39524	3.44617	9.1896
JU1200	8	3.8381	3.70229	11.1603
JU1200	8	3.55511	3.54596	9.90094
JU1200	8	3.84946	3.69048	11.1576
JU1200	8	3.98571	3.86363	12.0946
JU1200	8	4.28346	4.43846	14.932
JU1200	8	3.99664	4.19873	13.1796
JU1200	8	3.73742	3.55511	10.4355
JU1200	8	3.5089	3.3663	9.27716
JU1200	9	3.69343	3.73742	10.8416
JU1200	9	4.57619	4.58564	16.4814
JU1200	9	3.79529	3.97479	11.8481
JU1200	9	3.76355	3.90836	11.5527
JU1200	9	3.93892	3.79529	11.7412
JU1200	9	3.89729	3.98852	12.2086
JU1200	9	3.61888	3.73742	10.6227
JU1200	9	3.73447	3.8381	11.2573
JU1200	9	4.25025	4.30383	14.3668
JU1200	9	3.44617	3.42402	9.26751
JU1200	9	3.1	3.25101	7.91536
JU1200	9	3.70229	3.69048	10.7311
JU1200	9	3.54596	3.59172	10.0029
JU1200	10	3.96106	3.63099	11.296
JU1200	10	4.05347	3.90836	12.4426
JU1200	10	3.56736	3.3694	9.4404
JU1200	10	3.83249	3.78377	11.3893
JU1200	10	3.43347	3.3173	8.94556
JU1200	10	3.88327	3.54906	10.8243
JU1200	10	4.16743	3.93065	12.8654
JU1200	10	4.38901	4.49692	15.5014
JU1200	10	4.01568	3.96106	12.4928
JU1200	10	3.70229	3.77226	10.9689
JU1200	10	3.4996	3.44307	9.46356
JU1200	10	3.76355	3.76355	11.1246
JU1200	10	3.77226	3.77226	11.1762
JU1200	10	4.01568	3.4996	11.0374
JU1200	10	3.78377	3.63099	10.7904
JU1200	10	3.83249	3.79529	11.4239
JU1200	10	4.083	4.083	13.0933
JU1200	10	3.26105	3.11402	7.97571
JU1200	10	4.13599	3.7169	12.074
JU1200	10	3.54596	3.39849	9.46474
JU1200	10	3.56736	3.23758	9.07105
JU1200	10	4.06159	4.09362	13.0585
JU1200	10	3.47451	3.30091	9.00776
JU1200	10	3.8409	3.69343	11.1417
JU1200	11	3.98852	4.14381	12.9808
JU1200	11	3.88327	3.27773	9.99679
JU1200	11	3.93892	3.97479	12.2965
JU1200	11	3.47451	3.30091	9.00776
JU1200	11	3.63099	3.19344	9.10696
JU1200	11	3.89729	3.8096	11.6609
JU1200	11	3.8381	3.63099	10.9454
JU1200	11	4.35919	4.13599	14.1604
JU1200	11	3.83249	3.87485	11.6634
JU1200	11	3.92239	4.03192	12.4209
JU1200	11	4.16743	4.1016	13.4249
JU1200	11	4.03192	4.09362	12.9631
JU1200	11	3.5089	3.70229	10.2031
JU1200	11	4.38163	4.10425	14.1241
JU1200	11	3.77226	3.89729	11.5466
JU1200	12	3.6459	3.37265	9.65752
JU1200	12	4.01568	3.6459	11.4988
JU1200	12	4.44082	4.3617	15.2128
JU1200	12	3.54286	3.55511	9.89228
JU1200	12	3.90836	4.083	12.5332
JU1200	12	3.88327	3.54596	10.8149
JU1200	12	3.63099	3.60382	10.2773
JU1200	12	3.89729	3.5213	10.7784
JU1200	12	3.92239	3.96106	12.2026
JU1200	12	3.59482	3.37265	9.52223
JU1200	12	3.9001	3.84946	11.7914
JU1200	12	4.62121	4.55951	16.5487
JU1200	12	3.57046	3.3173	9.30247
JU1200	12	3.76355	3.78082	11.1757
JU1200	12	4.17791	4.083	13.3976
JU1200	12	3.98852	3.72576	11.6712
DL238	1	3.96106	3.82953	11.9137
DL238	1	3.79529	3.76355	11.2184
DL238	1	3.43347	3.70229	9.98374
DL238	1	4.40392	4.30383	14.8862
DL238	1	4.52836	4.29867	15.2885
DL238	2	3.3663	3.54906	9.38332
DL238	2	4.38901	4.4823	15.451
DL238	2	3.40808	3.2677	8.74664
DL238	2	3.96106	3.69933	11.5087
DL238	2	4.01022	3.84946	12.1243
DL238	2	3.08243	2.9078	7.0396
DL238	2	3.5089	3.5089	9.67015
DL238	2	3.3663	3.47451	9.18622
DL238	2	3.1558	3.27773	8.12406
DL238	2	2.97083	2.9078	6.78473
DL238	2	3.11402	2.96714	7.25689
DL238	2	4.083	4.083	13.0933
DL238	2	3.2677	3.33043	8.54736
DL238	2	4.58328	4.62358	16.6435
DL238	2	4.34162	4.34162	14.8045
DL238	2	3.88327	3.69343	11.2646
DL238	2	4.02926	3.98852	12.622
DL238	2	3.47451	3.44617	9.40415
DL238	2	3.45561	3.23758	8.7869
DL238	2	4.01568	3.6459	11.4988
DL238	2	3.59172	3.40808	9.61396
DL238	2	3.01084	3.27773	7.75088
DL238	2	3.3173	3.04331	7.92904
DL238	2	3.12805	3.18665	7.82885
DL238	2	3.99664	3.39524	10.6575
DL238	2	3.44617	3.40808	9.22436
DL238	3	3.40808	3.224	8.62968
DL238	3	3.65195	3.76355	10.7947
DL238	3	4.11754	3.88327	12.5581
DL238	3	3.77226	3.56736	10.5691
DL238	3	3.88327	3.7169	11.3362
DL238	3	3.44617	3.27773	8.87156
DL238	3	3.83249	3.76355	11.3284
DL238	3	4.30383	3.96106	13.3893
DL238	3	3.8381	3.45561	10.4167
DL238	3	3.08243	3.08243	7.46238
DL238	4	3.73447	3.87485	11.3651
DL238	4	3.69048	3.25101	9.42304
DL238	4	3.8381	3.70229	11.1603
DL238	4	3.73447	3.73447	10.9534
DL238	4	3.08243	3.224	7.8051
DL238	4	3.27773	3.3663	8.66596
DL238	4	3.84946	3.8409	11.6124
DL238	4	3.33043	3.44617	9.01419
DL238	4	3.44617	3.55511	9.62231
DL238	4	4.46769	4.28346	15.0303
DL238	4	3.27773	3.54596	9.12845
DL238	4	3.73742	3.99664	11.7316
DL238	4	3.98571	3.99664	12.511
DL238	4	2.96714	3.01084	7.01642
DL238	4	3.27773	3.42402	8.81455
DL238	4	3.59482	3.33043	9.40303
DL238	4	3.0718	3.1592	7.62184
DL238	4	4.25025	4.01568	13.4049
DL238	4	3.69048	3.83249	11.1084
DL238	4	3.5213	3.43347	9.4957
DL238	4	4.083	4.083	13.0933
DL238	4	3.93892	4.34413	13.4391
DL238	4	4.22722	4.17526	13.8621
DL238	4	3.61888	3.54906	10.0874
DL238	4	3.92239	3.6459	11.2317
DL238	4	3.99664	3.98571	12.511
DL238	4	3.90836	3.88327	11.9202
DL238	4	3.5089	3.57046	9.83979
DL238	4	3.61888	3.27773	9.31618
DL238	4	3.86363	3.69343	11.2077
DL238	4	3.59482	3.40808	9.62225
DL238	4	3.73447	3.59482	10.5438
DL238	4	3.17986	3.08243	7.69825
DL238	4	3.8381	3.83249	11.5528
DL238	4	3.96106	3.96106	12.3229
DL238	4	3.84946	3.8409	11.6124
DL238	4	3.83249	3.93892	11.8563
DL238	4	3.24083	3.3173	8.44365
DL238	4	2.98545	2.95607	6.93129
DL238	4	3.224	3.47451	8.79789
DL238	4	3.33043	3.2677	8.54736
DL238	4	2.98545	2.98545	7.00017
DL238	4	3.93892	4.05347	12.5399
DL238	4	3.76355	3.90836	11.5527
DL238	4	3.61888	3.79529	10.7872
DL238	4	3.57046	3.30091	9.25652
DL238	4	3.84946	3.70229	11.1933
DL238	4	3.93892	3.90836	12.091
DL238	4	3.3663	3.39849	8.98522
DL238	4	4.28346	3.88327	13.0642
DL238	4	3.76355	3.70229	10.9435
DL238	4	3.73447	3.61888	10.6143
DL238	4	3.70229	3.8381	11.1603
DL238	4	3.59482	3.2677	9.22589
DL238	4	2.94131	2.94131	6.79472
DL238	4	4.13599	4.13599	13.4353
DL238	4	4.26058	4.40392	14.7366
DL238	4	3.93892	3.84946	11.9088
DL238	4	3.2677	3.40808	8.74664
DL238	4	3.43347	3.10354	8.36914
DL238	4	3.5089	3.78377	10.4276
DL238	4	3.84946	3.54596	10.7207
DL238	5	3.48396	3.69048	10.0982
DL238	5	3.72576	3.66671	10.7295
DL238	5	3.33043	3.47451	9.08833
DL238	5	3.70229	3.56736	10.3731
DL238	5	2.50952	3.16953	6.24706
DL238	5	3.78082	3.87485	11.5062
DL238	5	3.17986	3.43347	8.57495
DL238	5	3.04331	3.24083	7.74627
DL238	5	3.5089	3.65195	10.0644
DL238	5	3.17986	3.43347	8.57495
DL238	5	2.29164	2.43453	4.38179
DL238	6	3.10354	2.97083	7.24146
DL238	6	3.11402	3.3173	8.11327
DL238	6	3.30091	3.3694	8.73528
DL238	6	3.3173	3.17986	8.2848
DL238	6	3.12805	3.5089	8.62055
DL238	6	2.95238	3.0718	7.12288
DL238	6	3.16953	3.3694	8.3876
DL238	6	3.3173	3.54906	9.2467
DL238	6	3.45561	4.11222	11.1607
DL238	6	3.23758	3.17986	8.08572
DL238	6	3.3694	3.63099	9.60877
DL238	7	3.03962	3.27773	7.82498
DL238	7	3.11402	3.19344	7.81036
DL238	7	3.23758	3.2677	8.30906
DL238	7	3.10354	3.30091	8.04602
DL238	7	2.98899	3.3694	7.90984
DL238	7	3.12805	3.17986	7.81217
DL238	7	3.44617	3.42402	9.26751
DL238	7	2.9078	3.12805	7.14378
DL238	7	2.74586	3.04331	6.5632
DL238	7	2.91149	3.1592	7.22407
DL238	8	3.23758	3.57046	9.07894
DL238	8	2.97083	3.24083	7.56178
DL238	8	2.69375	2.82026	5.96674
DL238	8	2.97083	3.23758	7.55421
DL238	8	3.24083	3.3173	8.44365
MY23	1	2.90027	2.86617	6.52876
MY23	1	2.64076	2.83945	5.88915
MY23	1	1.98046	2.50952	3.90343
MY23	2	3.5089	3.17986	8.76334
MY23	2	3.97479	3.69933	11.5486
MY23	2	3.224	2.9078	7.36291
MY23	2	3.6459	3.5213	10.0832
MY23	2	3.08243	3.2677	7.91089
MY23	2	3.224	3.16953	8.02564
MY23	2	2.85097	3.08243	6.90201
MY23	2	3.65195	3.3663	9.65535
MY23	2	3.10354	3.17986	7.75097
MY23	3	2.31053	2.77347	5.03298
MY23	3	3.04331	3.3173	7.92904
MY23	4	2.75782	2.98899	6.47411
MY23	4	2.50952	2.98899	5.89123
MY23	5	2.66128	2.75782	5.76429
MY23	5	2.99859	3.04331	7.16726
MY23	6	2.29164	2.47454	4.45379
MY23	6	2.4211	2.62821	4.99761
MY23	6	2.83945	2.98899	6.66575
MY23	6	2.80092	2.47454	5.44359
MY23	6	2.71398	2.47454	5.27461
MY23	6	2.72195	2.61581	5.59211
MY23	6	2.52251	2.85097	5.64827
MY23	7	2.82026	2.83945	6.28947
MY23	7	2.98899	2.77347	6.51085
MY23	7	3.01084	2.9078	6.87609
MY23	7	2.72195	2.86617	6.12734
MY23	7	3.08243	2.94131	7.12073
MY23	7	3.1558	3.1558	7.82184
MY23	7	2.80476	2.8086	6.18694
MY23	7	2.75782	2.72195	5.8957
MY23	7	3.13144	3.26105	8.02033
MY23	7	2.83945	2.95607	6.59234
MY23	7	2.90027	2.98545	6.80046
MY23	7	2.98545	2.5138	5.89428
JU775	1	2.9078	3.17986	7.26211
JU775	1	3.04331	3.03962	7.26535
JU775	1	3.89729	3.8096	11.6609
JU775	1	2.57802	2.52251	5.10751
JU775	1	2.85097	2.94131	6.58602
JU775	1	2.1945	2.29636	3.95792
JU775	1	3.03962	3.11402	7.43416
JU775	1	3.04331	3.01084	7.19655
JU775	1	2.77347	2.70999	5.90311
JU775	2	2.98545	2.82026	6.61285
JU775	2	3.70229	3.56736	10.3731
JU775	2	3.56736	3.63099	10.1733
JU775	2	3.44307	3.3173	8.97056
JU775	2	3.2677	3.45561	8.86863
JU775	2	3.70229	3.6459	10.6014
JU775	2	3.34682	3.1592	8.30421
JU775	2	3.48396	3.3663	9.2112
JU775	2	3.3173	3.12805	8.14981
JU775	2	3.57046	3.59172	10.072
JU775	3	3.03962	2.9078	6.94183
JU775	3	3.16953	3.39849	8.45999
JU775	3	3.30091	3.3694	8.73528
JU775	3	3.3663	3.27773	8.66596
JU775	3	3.70229	3.30091	9.59828
JU775	3	3.27773	3.39849	8.74881
JU775	3	3.1592	3.3173	8.23096
JU775	3	2.94131	2.94131	6.79472
JU775	3	2.97083	2.80092	6.53536
JU775	3	2.94131	2.94131	6.79472
JU775	3	3.11402	3.03962	7.43416
JU775	3	2.64076	2.83945	5.88915
JU775	3	2.97083	3.10354	7.24146
JU775	4	3.10354	2.98899	7.28571
JU775	4	3.30091	3.3694	8.73528
JU775	4	3.12805	3.23758	7.95397
JU775	4	3.63099	3.76355	10.7328
JU775	4	3.45561	3.33043	9.03891
JU775	4	3.18665	3.01084	7.5355
JU775	4	2.86617	2.86617	6.452
JU775	4	3.01084	3.13144	7.40494
JU775	4	3.88327	3.7169	11.3362
JU775	4	3.90836	3.8409	11.7901
JU775	4	3.43347	3.45561	9.31856
JU775	4	3.10354	3.03962	7.40913
JU775	4	3.97479	3.60382	11.2504
JU775	4	3.4996	3.5213	9.6786
JU775	4	3.61888	3.84946	10.9412
JU775	4	3.66671	3.72576	10.7295
JU775	5	2.90027	3.10354	7.06946
JU775	5	3.54906	3.5089	9.7808
JU775	5	3.79529	3.65195	10.8858
JU775	5	3.83249	3.69048	11.1084
JU775	5	2.66128	3.04331	6.36102
JU775	5	3.8381	3.78377	11.4059
JU775	5	3.43347	3.4996	9.43718
JU775	5	3.5089	3.30091	9.09693
JU775	5	3.40808	3.45561	9.24964
JU775	5	3.57046	3.27773	9.19153
JU775	5	3.73742	3.55511	10.4355
JU775	5	3.6459	3.78377	10.8348
JU775	5	3.5089	3.65195	10.0644
JU775	5	3.89729	3.72576	11.4043
JU775	5	3.45561	3.45561	9.37865
JU775	5	3.93892	3.54906	10.9794
JU775	5	3.3173	3.4996	9.11786
JU775	5	3.73742	3.57046	10.4806
JU775	6	2.65714	2.54835	5.31819
JU775	6	2.74586	2.53979	5.47729
JU775	6	3.3173	2.94131	7.66328
JU775	6	2.94131	3.10354	7.16949
JU775	6	2.94131	2.98899	6.90486
JU775	6	2.40309	2.5268	4.76903
JU775	7	3.78377	3.92239	11.6564
JU775	7	3.90836	3.73742	11.4725
JU775	7	3.88327	3.86363	11.7837
JU775	7	3.69343	3.70229	10.7396
JU775	7	3.98852	3.98852	12.4943
JU775	7	3.4996	3.30091	9.07282
JU775	7	3.92239	3.97479	12.2449
JU775	7	4.40392	4.76057	16.466
JU775	7	3.76355	3.70229	10.9435
JU775	7	4.45071	4.58564	16.0295
JU775	7	3.08243	3.47451	8.41157
JU775	7	3.40808	3.8409	10.2809
JU775	7	3.54596	3.59172	10.0029
JU775	7	3.73447	3.73447	10.9534
JU775	7	3.4996	3.4996	9.61895

## Sheet: 7 sperm number hermaphrodites
Strain	Self-sperm number
LSJ1	173
LSJ1	152
LSJ1	142
LSJ1	220
LSJ1	225
LSJ1	182
LSJ1	171
LSJ1	129
LSJ1	154
LSJ1	211
LSJ1	227
LSJ1	212
LSJ1	137
LSJ1	167
LSJ1	119
LSJ1	160
LSJ1	170
LSJ1	194
LSJ1	147
LSJ1	189
LSJ1	128
LSJ1	172
LSJ1	266
JU561	179
JU561	172
JU561	156
JU561	132
JU561	104
JU561	110
JU561	123
JU561	94
JU561	96
JU561	137
JU561	177
JU561	100
JU561	113
JU561	95
JU561	107
JU561	122
JU561	137
JU561	157
JU561	196
JU561	127
JU561	176
JU561	148
JU561	134
JU561	136
JU561	152
JU561	153
JU561	145
JU561	153
JU561	124
CX11285	145
CX11285	169
CX11285	138
CX11285	128
CX11285	137
CX11285	118
CX11285	146
CX11285	155
CX11285	141
CX11285	190
CX11285	174
CX11285	128
CX11285	160
CX11285	120
CX11285	141
CX11285	160
CX11285	145
CX11285	147
CX11285	144
CX11285	147
N2	131
N2	150
N2	163
N2	154
N2	133
N2	127
N2	125
N2	140
N2	167
N2	182
N2	128
N2	140
CB4856	167
CB4856	141
CB4856	142
CB4856	149
CB4856	152
CB4856	148
CB4856	137
CB4856	141
CB4856	115
CB4856	131
CB4856	129
CB4856	112
CB4856	126
CB4856	125
CB4856	124
CB4856	136
CB4856	132
CB4856	147
CB4856	148
CB4856	142
CB4856	184
CB4856	135
CB4856	121
CB4856	117
CB4856	142
CB4856	134
CB4856	138
CB4856	121
CB4856	132
CB4856	181
CB4856	98
EG4946	143
EG4946	198
EG4946	148
EG4946	241
EG4946	126
EG4946	140
EG4946	92
EG4946	188
EG4946	152
EG4946	143
EG4946	139
EG4946	140
EG4946	179
EG4946	149
EG4946	135
EG4946	159
EG4946	157
EG4946	165
EG4946	108
EG4946	89
EG4946	140
EG4946	205
EG4946	156
JU782	160
JU782	141
JU782	169
JU782	152
JU782	160
JU782	158
JU782	160
JU782	137
JU782	142
JU782	147
JU782	155
JU782	141
JU782	146
JU782	148
JU782	214
JU782	130
JU782	201
JU782	162
JU782	128
JU782	170
JU782	158
JU782	136
JU782	123
JU782	172
JU782	145
JU782	125
JU782	144
JU393	150
JU393	167
JU393	160
JU393	128
JU393	137
JU393	178
JU393	129
JU393	143
JU393	210
JU393	129
JU393	112
JU393	120
JU393	171
JU393	138
JU393	156
JU393	133
JU393	165
JU393	130
JU393	179
JU393	168

## Sheet: 8 body size wild strains 
Strain	Sex	Body width	Body length
LSJ1	H	61.879	1061.91
LSJ1	H	63.855	1048.84
LSJ1	H	56.9125	985.816
LSJ1	H	73.5576	1090.3
LSJ1	H	65.0426	1016.11
LSJ1	H	66.176	921.787
LSJ1	H	64.5338	935.603
LSJ1	H	68.3424	998.861
LSJ1	H	65.3313	986.68
LSJ1	H	62.4104	1018.17
LSJ1	H	54.3008	946.771
LSJ1	H	59.0625	994.548
LSJ1	H	59.3902	1007.7
LSJ1	H	61.9804	972.582
LSJ1	H	58.3664	960.485
LSJ1	H	59.8028	1035.04
LSJ1	H	63.6492	1012.31
LSJ1	H	68.8317	1107.56
LSJ1	H	61.6415	916.95
LSJ1	H	61.5391	999.247
LSJ1	H	54.6376	919.239
JU561	H	56.5419	938.157
JU561	H	60.8194	1075.92
JU561	H	48.1303	939.898
JU561	H	58.438	1004.54
JU561	H	54.0971	946.383
JU561	H	57.3702	1029.64
JU561	H	58.0695	1066.14
JU561	H	59.2489	1062.61
JU561	H	52.892	1010.18
JU561	H	63.1865	1059.45
JU561	H	58.608	1045.05
JU561	H	54.0592	1055.21
JU561	H	56.6801	989.161
JU561	H	46.355	915.816
JU561	H	58.608	1052.15
JU561	H	57.9609	1032.36
JU561	H	51.1905	918.463
JU561	H	61.3344	1075.49
CX11285	H	60.0408	928.497
CX11285	H	60.9345	969.48
CX11285	H	59.3452	928.765
CX11285	H	64.4453	944.794
CX11285	H	62.4207	946.995
CX11285	H	57.3438	890.358
CX11285	H	64.3848	934.961
CX11285	H	61.8366	943.29
CX11285	H	66.5778	973.84
CX11285	H	59.4763	1021.7
CX11285	H	61.1326	967.778
CX11285	H	58.1083	950.294
CX11285	H	66.1351	992.553
CX11285	H	59.068	922.459
CX11285	H	59.6502	963.745
CX11285	H	59.0606	1007.39
CX11285	H	63.1442	985.376
CX11285	H	64.3383	1007.65
N2	H	59.5488	1083.8
N2	H	61.6051	1136.67
N2	H	60.1059	1098.71
N2	H	60.6286	983.624
N2	H	68.049	1109.75
N2	H	57.2992	1051.82
N2	H	60.45	1061.69
N2	H	58.5602	1019.16
N2	H	57.4498	1080.58
N2	H	65.9714	1089.24
N2	H	60.1059	1011.97
N2	H	65.1	1090.79
N2	H	61.4432	1032.56
N2	H	63.1991	1008.54
N2	H	64.6601	1034.09
N2	H	54.3715	1017.16
N2	H	60.6286	1012.95
N2	H	67.4808	1078.25
N2	H	62.5592	1047.72
N2	H	61.4711	1095.85
DL238	H	53.0835	893.867
DL238	H	45.9383	880.791
DL238	H	52.9663	844.867
DL238	H	49.5002	899.025
DL238	H	53.82	810.171
DL238	H	54.2283	988.573
DL238	H	57.5	1025.28
DL238	H	56.0734	1011.45
DL238	H	57.102	1025.68
DL238	H	52.0298	1030.27
DL238	H	55.3722	1069.79
DL238	H	59.7088	1021.59
DL238	H	53.1969	991.845
DL238	H	55.255	1067.67
DL238	H	56.0864	1042.03
DL238	H	57.0034	1069.73
DL238	H	60.557	1080.75
JU751	H	54.3232	940.206
JU751	H	57.8172	919.552
JU751	H	62.5248	1006.07
JU751	H	55.9934	832.932
JU751	H	55.9004	907.688
JU751	H	49.6313	835.011
JU751	H	51.3611	852.195
JU751	H	55.2467	977.339
JU751	H	43.7202	853.777
JU751	H	53.0835	912.498
JU751	H	49.1403	859.668
JU751	H	52.1135	935.293
JU751	H	52.7487	968.452
JU751	H	53.82	965.25
JU751	H	48.0457	917.621
JU751	H	57.3968	962.371
JU751	H	53.2379	949.293
JU1200	H	49.1059	958.528
JU1200	H	51.4867	898.526
JU1200	H	42.1076	831.902
JU1200	H	53.2379	955.746
JU1200	H	52.6501	937.767
JU1200	H	46.5	834.306
JU1200	H	55.7144	976.945
JU1200	H	42.4145	901.55
JU1200	H	60.8564	949.351
JU1200	H	50.0359	856.207
JU1200	H	53.5299	848.013
JU1200	H	47.8745	850.445
JU1200	H	46.7316	904.098
JU1200	H	50.2972	913.689
JU1200	H	51.9554	929.14
JU1200	H	50.6404	875.832
JU1200	H	51.0124	839.408
JU1200	H	53.0184	873.155
JU1200	H	54.1083	901.536
JU1200	H	57.5251	902.764
JU1200	H	50.9807	885.99
CB4856	H	60.2426	917.982
CB4856	H	58.2645	898.49
CB4856	H	59.9329	960.497
CB4856	H	60.6286	994.128
CB4856	H	57.3968	940.955
CB4856	H	56.6612	985
CB4856	H	57.8172	969.592
CB4856	H	59.9831	1022.62
CB4856	H	58.0636	960.118
CB4856	H	57.8469	944.396
CB4856	H	59.0606	963.01
CB4856	H	64.0556	1019.71
CB4856	H	58.3752	957.37
CB4856	H	55.442	1007.67
CB4856	H	61.8292	913.756
CB4856	H	62.0598	978.151
CB4856	H	60.45	917.382
CB4856	H	61.1326	1000.12
CB4856	H	61.871	977.724
EG4946	H	65.6692	1010.64
EG4946	H	59.4186	1004.18
EG4946	H	63.9003	1000.55
EG4946	H	69.0776	1000.23
EG4946	H	75.0138	1006.57
EG4946	H	69.7193	1008.69
EG4946	H	63.4725	980.744
EG4946	H	61.9761	905.109
EG4946	H	64.887	975.807
EG4946	H	61.6469	973.562
EG4946	H	59.998	951.218
EG4946	H	59.7013	990.217
EG4946	H	62.3863	925.976
EG4946	H	63.3014	942.691
EG4946	H	71.9718	998.219
EG4946	H	65.2655	904.361
JU782	H	64.98	1058.53
JU782	H	59.8967	1003.67
JU782	H	60.6286	946.577
JU782	H	62.8699	1004.46
JU782	H	62.5592	946.121
JU782	H	59.4763	898.073
JU782	H	60.6286	956.412
JU782	H	59.1778	972.415
JU782	H	69.0525	986.068
JU782	H	68.8451	1017.07
JU782	H	61.2526	926.295
JU782	H	60.1347	978.975
JU782	H	59.4186	916.075
JU782	H	55.4894	972.972
JU782	H	62.4765	990.849
JU393	H	61.9804	1039.35
JU393	H	60.6126	1007.49
JU393	H	68.5031	1062.9
JU393	H	61.8535	956.234
JU393	H	65.147	1006.29
JU393	H	59.4608	966.857
JU393	H	64.5328	1058.73
JU393	H	58.3664	1003.7
JU393	H	63.8468	1017.31
JU393	H	59.856	994.278
JU393	H	58.2128	976.264
JU393	H	56.8655	992.24
JU393	H	62.6449	1035.02
JU393	H	57.9968	986.314
JU393	H	62.7872	1075.03
JU393	H	61.5135	981.839
JU393	H	54.9438	879.154
JU393	H	61.8524	1027.26
JU393	H	68.2349	1034.47
JU393	H	59.6983	1077.5
JU393	H	59.2489	1008.73
JU393	H	68.7171	1040.44
JU393	H	63.5755	1069.61
JU393	H	56.158	1072.1
JU393	H	62.7534	997.953
JU393	H	64.1171	1000.67
JU393	H	69.3928	1107.13
LSJ1	M	37.2677	758.673
LSJ1	M	43.1577	716.36
LSJ1	M	38.4717	667.72
LSJ1	M	38.6345	656.082
LSJ1	M	38.9181	707.239
LSJ1	M	39.8764	706.25
LSJ1	M	37.2677	705.116
LSJ1	M	36.3125	687.346
LSJ1	M	39.1454	696.81
LSJ1	M	38.225	697.352
LSJ1	M	40.1385	759.261
LSJ1	M	35.7166	715.512
LSJ1	M	46.5352	742.925
LSJ1	M	40.7599	686.33
LSJ1	M	42.7676	708.402
LSJ1	M	42.6079	768.837
LSJ1	M	40.7732	765.964
LSJ1	M	44.2972	629.291
LSJ1	M	39.6173	704.449
LSJ1	M	43.0123	713.561
LSJ1	M	39.9286	743.226
LSJ1	M	45.1981	739.979
LSJ1	M	47.5048	803.456
LSJ1	M	46.3888	716.497
JU561	M	41.1817	741.322
JU561	M	43.2068	729.391
JU561	M	40.7988	694.605
JU561	M	41.322	726.861
JU561	M	46.2086	789.044
JU561	M	45.2565	732.327
JU561	M	45.4643	740.299
JU561	M	42.2127	749.964
JU561	M	40.1385	749.112
JU561	M	41.8257	749.715
JU561	M	41.2073	648.085
JU561	M	42.2127	724.512
JU561	M	45.2565	771.695
JU561	M	42.8075	700.079
JU561	M	41.7755	676.601
JU561	M	44.2142	707.454
JU561	M	46.6253	746.529
JU561	M	43.1945	776.838
JU561	M	45.152	771.276
CX11285	M	45.4756	599.894
CX11285	M	37.756	648.101
CX11285	M	37.756	696.904
CX11285	M	38.9856	682.665
CX11285	M	41.9885	759.183
CX11285	M	45.4418	782.99
CX11285	M	44.7794	705.047
CX11285	M	40.2552	776.644
CX11285	M	36.4568	657.712
CX11285	M	44.978	716.191
CX11285	M	33.3015	718.253
CX11285	M	35.819	677.148
CX11285	M	41.0036	754.104
CX11285	M	42.1758	737.134
CX11285	M	39.0256	794.204
CX11285	M	41.6752	777.571
CX11285	M	36.7005	686.772
CX11285	M	42.1635	780.278
CX11285	M	39.2406	772.135
N2	M	43.2068	852.339
N2	M	47.2734	843.706
N2	M	42.7993	839.063
N2	M	42.0888	788.913
N2	M	47.9552	847.236
N2	M	43.2068	795.397
N2	M	47.0379	779.332
N2	M	43.0491	776.885
N2	M	42.0888	746.123
N2	M	39.8764	769.467
N2	M	42.8659	800.014
N2	M	40.9647	749.659
N2	M	42.5833	789.008
N2	M	47.0154	817.293
N2	M	45.3486	759.215
N2	M	42.7676	819.905
N2	M	40.7599	729.696
N2	M	39.1863	770.619
N2	M	41.7632	762.278
N2	M	46.7942	761.565
N2	M	37.881	708.307
N2	M	51.4864	825.815
N2	M	48.5091	765.664
DL238	M	41.6845	781.971
DL238	M	50.3316	770.733
DL238	M	50.4088	864.465
DL238	M	43.2729	732.578
DL238	M	44.1136	789.06
DL238	M	29.3648	761.748
DL238	M	46.6116	796.384
DL238	M	45.1506	760.3
DL238	M	47.4207	777.699
DL238	M	47.8206	869.525
DL238	M	45.9383	795.608
DL238	M	42.9418	776.939
DL238	M	44.1824	738.774
DL238	M	49.4304	779.42
DL238	M	49.3691	830.561
DL238	M	48.2261	784.42
DL238	M	45.4277	823.807
DL238	M	42.1076	818.602
DL238	M	47.0543	799.577
DL238	M	47.2477	859.592
DL238	M	42.8711	777.728
JU751	M	45.1695	879.868
JU751	M	42.7799	779.511
JU751	M	43.0609	776.338
JU751	M	45.1669	808.029
JU751	M	46.1426	830.105
JU751	M	39.8758	764.701
JU751	M	40.7727	808.601
JU751	M	41.1725	839.883
JU751	M	44.335	812.363
JU751	M	40.1512	789.294
JU751	M	39.9808	795.775
JU751	M	42.5869	876.181
JU751	M	41.9885	858.907
JU751	M	50.4815	880.416
JU751	M	47.5298	835.037
JU1200	M	46.9729	814.279
JU1200	M	45.6143	783.525
JU1200	M	46.7881	813.35
JU1200	M	47.32	826.468
JU1200	M	48.0044	826.061
JU1200	M	43.4607	806.278
JU1200	M	44.5828	761.436
JU1200	M	45.9747	765.244
JU1200	M	50.8644	805.652
JU1200	M	45.9148	767.208
JU1200	M	46.7855	773.682
JU1200	M	45.8605	747.972
JU1200	M	45.5826	728.509
JU1200	M	44.4973	760.962
JU1200	M	49.0814	826.581
JU1200	M	48.2521	827.742
JU1200	M	47.5631	810.877
JU1200	M	48.1626	867.089
JU1200	M	47.0118	849.859
JU1200	M	44.9457	834.736
JU1200	M	44.8725	806.225
CB4856	M	46.1247	751.235
CB4856	M	44.978	755.831
CB4856	M	44.1067	782.572
CB4856	M	40.3985	758.633
CB4856	M	39.7576	656.273
CB4856	M	44.3555	746.426
CB4856	M	42.6693	809.864
CB4856	M	42.4727	794.621
CB4856	M	40.9135	753.984
CB4856	M	48.5634	753.159
CB4856	M	43.557	740.945
CB4856	M	43.0491	742.697
CB4856	M	46.7942	767.461
CB4856	M	45.1981	741.164
CB4856	M	42.1257	748.506
CB4856	M	41.7632	697.945
CB4856	M	43	744.653
CB4856	M	41.2073	695.161
CB4856	M	46.4339	790.494
CB4856	M	44.0709	772.254
CB4856	M	44.1313	699.606
EG4946	M	50.4165	704.475
EG4946	M	47.8017	690.867
EG4946	M	52.0136	716.49
EG4946	M	49.9261	641.17
EG4946	M	42.0264	728.968
EG4946	M	43.4484	767.063
EG4946	M	42.0264	718.415
EG4946	M	43.388	731.106
EG4946	M	52.1344	690.357
EG4946	M	48.6391	772.569
JU782	M	51.1905	808.375
JU782	M	48.9401	831.516
JU782	M	58.565	827.357
JU782	M	52.8531	798.049
JU782	M	47.1956	852.803
JU782	M	45.0589	821.413
JU782	M	41.1182	842.207
JU782	M	55.1905	884.38
JU782	M	45.4418	801.434
JU782	M	54.4626	840.798
JU782	M	49.8626	797.648
JU782	M	44.4507	816.766
JU782	M	48.5091	858.009
JU782	M	43.5928	786.442
JU782	M	44.8725	785.222
JU782	M	49.4193	830.863
JU782	M	49.62	826.249
JU782	M	49.1531	813.055
JU782	M	52.0884	842.783
JU782	M	41.2708	802.296
JU782	M	46.6929	750.719
JU782	M	49.663	842.264
JU782	M	48.1948	794.369
JU782	M	44.0361	801.048
JU393	M	44.6033	794.308
JU393	M	47.7249	811.629
JU393	M	45.8431	796.648
JU393	M	44.978	776.538
JU393	M	45.9916	774.418
JU393	M	45.752	715.033
JU393	M	48.7681	754.274
JU393	M	46.3888	793.704
JU393	M	50.9898	735.024
JU393	M	44.4507	796.422
JU393	M	52.7733	745.202
JU393	M	49.9261	751.985
JU393	M	42.3243	723.038
JU393	M	47.7167	748.07
JU393	M	45.752	781.913
JU393	M	53.2084	745.481
JU393	M	46.0714	745.172

## Sheet: 9 sperm size N2 LSJ1 LSJ2 CC1
Strain	Sex	Individual	Sperm diameter 1 (microns)	Sperm diameter 2 (microns)	Sperm cross-sectional area
N2	Male	12	5.24392	4.63061	19.0715
N2	Male	12	6.16913	4.7027	22.7857
N2	Male	12	5.09371	4.22281	16.8937
N2	Male	12	5.50751	5.02207	21.7234
N2	Male	12	5.47215	4.20899	18.0895
N2	Male	12	4.89682	4.90738	18.8736
N2	Male	12	5.36951	5.7433	24.2206
N2	Male	12	5.36951	4.38959	18.5118
N2	Male	12	5.75568	5.24392	23.7051
N2	Male	12	5.13923	4.48726	18.1121
N2	Male	12	5.36106	5.07844	21.3831
N2	Male	12	5.24392	4.21053	17.3414
N2	Male	12	5.05289	4.82896	19.1639
N2	Male	12	5.15055	4.17659	16.8953
N2	Male	12	5.4437	5.51808	23.5924
N2	Male	11	5.24392	4.83967	19.9325
N2	Male	11	6.16913	5.18061	25.1012
N2	Male	11	5.09371	4.28215	17.1311
N2	Male	11	5.50751	5.56013	24.0508
N2	Male	11	5.47215	5.36589	23.0616
N2	Male	11	4.89682	5.76691	22.1793
N2	Male	11	5.36951	5.73879	24.2016
N2	Male	11	5.36951	5.22909	22.0521
N2	Male	11	5.75568	5.38034	24.3218
N2	Male	11	5.13923	5.34172	21.561
N2	Male	11	5.36106	5.47215	23.0409
N2	Male	11	5.24392	5.33081	21.9553
N2	Male	11	5.05289	5.39595	21.414
N2	Male	11	5.15055	5.9871	24.2192
N2	Male	11	5.4437	5.94263	25.4075
N2	Male	10	4.98586	5.90001	23.1038
N2	Male	10	5.07844	5.36106	21.3831
N2	Male	10	5.14049	5.80047	23.4184
N2	Male	10	5.39595	5.59724	23.7209
N2	Male	10	4.99494	4.77913	18.7486
N2	Male	10	5.31135	5.06824	21.1423
N2	Male	10	5.47924	5.01046	21.562
N2	Male	10	6.04625	5.36951	25.4982
N2	Male	10	5.1241	5.64788	22.7296
N2	Male	10	5.80605	5.29182	24.131
N2	Male	10	5.4615	5.60186	24.0289
N2	Male	10	5.02207	5.25994	20.7469
N2	Male	10	5.71167	5.7162	25.6425
N2	Male	10	5.25255	6.18903	25.5319
N2	Male	10	5.24392	5.88574	24.2408
N2	Male	9	4.44234	5.46506	19.0676
N2	Male	9	4.56871	5.15432	18.495
N2	Male	9	4.1408	5.54031	18.0181
N2	Male	9	5.02851	4.61942	18.2438
N2	Male	9	4.60679	4.75334	17.1984
N2	Male	9	5.44727	5.50281	23.5425
N2	Male	9	6.2359	5.54731	27.1689
N2	Male	9	5.56478	4.89682	21.4019
N2	Male	9	5.15934	5.84935	23.7023
N2	Male	9	4.95593	4.55026	17.7113
N2	Male	9	5.95568	6.47714	30.2973
N2	Male	9	5.31135	5.33081	22.2376
N2	Male	9	5.17436	5.7568	23.3953
N2	Male	9	4.28215	5.49457	18.4793
N2	Male	9	6.22343	5.68556	27.7903
N2	Male	8	5.30891	5.15055	21.4758
N2	Male	8	4.69031	6.12598	22.5666
N2	Male	8	4.10943	4.55026	14.6862
N2	Male	8	5.24392	5.74893	23.6774
N2	Male	8	5.11272	4.85968	19.5142
N2	Male	8	5.47215	6.00329	25.8011
N2	Male	8	6.25765	5.92518	29.1207
N2	Male	8	4.69858	4.91134	18.1241
N2	Male	8	5.07334	4.99753	19.9131
N2	Male	8	4.84368	5.03622	19.1589
N2	Male	8	5.13923	5.47097	22.0827
N2	Male	8	5.26363	5.01046	20.7134
N2	Male	8	4.98975	4.80074	18.8139
N2	Male	8	4.76422	5.20926	19.492
N2	Male	8	5.14804	5.47215	22.1253
N2	Male	7	4.869	5.23404	20.0155
N2	Male	7	4.77778	6.02373	22.6038
N2	Male	7	5.05161	5.15055	20.4349
N2	Male	7	5.4615	4.38959	18.8289
N2	Male	7	5.15055	5.41868	21.9198
N2	Male	7	4.98975	5.08353	19.9221
N2	Male	7	5.31135	5.39475	22.5043
N2	Male	7	3.25749	3.78145	9.67456
N2	Male	7	5.13923	5.47097	22.0827
N2	Male	7	4.98586	5.09878	19.9663
N2	Male	7	5.3514	5.91534	24.8621
N2	Male	7	5.2105	5.25871	21.5203
N2	Male	7	5.15808	5.24392	21.2439
N2	Male	7	5.46506	5.81162	24.9449
N2	Male	7	4.75198	5.49104	20.4936
N2	Male	6	5.15055	5.0375	20.3779
N2	Male	6	4.93892	4.92449	19.1022
N2	Male	6	5.46624	5.55547	23.8506
N2	Male	6	5.35744	4.82628	20.3077
N2	Male	6	5.42346	4.73151	20.1542
N2	Male	6	4.46993	5.21919	18.3228
N2	Male	6	5.706	5.55664	24.902
N2	Male	6	5.30282	5.67986	23.6556
N2	Male	6	4.61942	5.36951	19.481
N2	Male	6	4.23352	5.69238	18.9272
N2	Male	6	4.92843	4.67649	18.1017
N2	Male	6	5.68556	5.13923	22.9488
N2	Male	6	5.24392	4.44234	18.2961
N2	Male	6	5.1881	5.91644	24.1079
N2	Male	6	4.73151	4.88624	18.1579
N2	Male	5	5.72072	5.30282	23.8258
N2	Male	5	4.90342	5.48986	21.1422
N2	Male	5	4.98586	5.8105	22.7533
N2	Male	5	5.46269	6.28138	26.9496
N2	Male	5	5.18061	5.30282	21.5763
N2	Male	5	4.76422	6.02051	22.5276
N2	Male	5	5.09878	4.85036	19.4236
N2	Male	5	4.61942	5.33081	19.3406
N2	Male	5	5.77924	5.27836	23.9585
N2	Male	5	4.82896	5.55081	21.0523
N2	Male	5	5.70147	5.15055	23.0638
N2	Male	5	5.79378	7.10228	32.3183
N2	Male	5	4.58568	5.80047	20.8909
N2	Male	5	5.48986	5.97195	25.7494
N2	Male	5	5.97195	5.97195	28.0106
N2	Male	4	4.44961	5.18061	18.1048
N2	Male	4	4.99753	5.43776	21.3435
N2	Male	4	4.98975	5.55081	21.7533
N2	Male	4	5.17436	5.7568	23.3953
N2	Male	4	5.98494	6.26901	29.4679
N2	Male	4	5.54731	5.44727	23.7329
N2	Male	4	4.44234	5.18061	18.0752
N2	Male	4	5.83162	5.46269	25.0199
N2	Male	4	4.74107	5.41868	20.1772
N2	Male	4	5.82718	5.7162	26.1611
N2	Male	4	4.91265	4.99753	19.2824
N2	Male	4	5.42704	5.23775	22.3253
N2	Male	4	4.44234	5.36951	18.7342
N2	Male	4	5.66732	5.64788	25.1393
N2	Male	4	5.04905	4.78319	18.9678
N2	Male	3	5.17436	5.07971	20.6436
N2	Male	3	4.60258	5.7162	20.6632
N2	Male	3	4.99753	6.07614	23.8491
N2	Male	3	4.93499	5.07971	19.6886
N2	Male	3	3.66325	3.78145	10.8796
N2	Male	3	4.18278	5.38995	17.7068
N2	Male	3	5.33081	5.24392	21.9553
N2	Male	3	4.74107	4.95593	18.454
N2	Male	3	5.49104	5.65703	24.3968
N2	Male	3	3.89107	3.78145	11.5563
N2	Male	3	4.23199	4.27459	14.2079
N2	Male	3	4.10943	4.74653	15.3196
N2	Male	3	5.28211	4.90186	20.3356
N2	Male	3	5.46631	5.45832	23.4338
N2	Male	3	5.40269	5.5081	23.3723
N2	Male	2	5.29793	5.29182	22.0192
N2	Male	2	5.2105	4.98586	20.4037
N2	Male	2	5.50399	4.91134	21.2308
N2	Male	2	5.55547	5.24392	22.8806
N2	Male	2	4.91265	6.03017	23.2668
N2	Male	2	5.48986	5.36951	23.1518
N2	Male	2	5.59609	5.59609	24.5957
N2	Male	2	5.46979	5.34172	22.9478
N2	Male	2	5.38995	5.57523	23.6014
N2	Male	2	5.70147	5.29305	23.7018
N2	Male	2	5.0375	4.58568	18.143
N2	Male	2	5.58451	5.54731	24.3309
N2	Male	2	5.36589	5.42346	22.8564
N2	Male	2	5.33202	5.7433	24.0516
N2	Male	2	5.22948	5.68307	23.3416
N2	Male	1	5.4615	4.83967	20.7596
N2	Male	1	5.57523	5.57523	24.4127
N2	Male	1	4.03154	4.58568	14.5199
N2	Male	1	4.10155	4.34663	14.002
N2	Male	1	5.15808	5.81162	23.5437
N2	Male	1	5.50751	4.92186	21.29
N2	Male	1	5.30282	4.76286	19.8365
N2	Male	1	4.17194	4.69031	15.3684
N2	Male	1	4.35407	4.0074	13.704
N2	Male	1	5.07844	5.32838	21.2528
N2	Male	1	4.66402	4.90342	17.9618
N2	Male	1	4.75198	5.65131	21.0918
N2	Male	1	5.09878	5.1881	20.7761
N2	Male	1	6.15759	5.57872	26.9795
N2	Male	1	5.14426	5.70147	23.0356
LSJ1	Male	1	4.58568	5.08353	18.3088
LSJ1	Male	1	4.67649	5.52862	20.3061
LSJ1	Male	1	3.78828	4.98716	14.8384
LSJ1	Male	1	4.7137	3.67559	13.6075
LSJ1	Male	1	4.23199	4.45978	14.8234
LSJ1	Male	1	3.78145	4.74653	14.0969
LSJ1	Male	1	4.78319	5.24392	19.6999
LSJ1	Male	1	4.16573	4.93892	16.159
LSJ1	Male	1	4.7137	5.14049	19.0308
LSJ1	Male	1	4.92186	4.77913	18.4743
LSJ1	Male	1	4.28215	3.80192	12.7866
LSJ1	Male	1	3.72629	4.12201	12.0636
LSJ1	Male	1	2.61887	4.58568	9.43209
LSJ1	Male	1	4.17659	4.07782	13.3764
LSJ1	Male	1	4.43067	5.17061	17.9929
LSJ1	Male	2	3.98798	4.44234	13.9141
LSJ1	Male	2	5.87253	4.45978	20.5697
LSJ1	Male	2	3.45977	5.82385	15.8251
LSJ1	Male	2	4.78319	4.91265	18.4554
LSJ1	Male	2	4.28819	5.54731	18.683
LSJ1	Male	2	4.37039	3.4127	11.7141
LSJ1	Male	2	4.13455	5.19931	16.8836
LSJ1	Male	2	4.36001	4.57296	15.6594
LSJ1	Male	2	4.93892	5.67986	22.0323
LSJ1	Male	2	3.98168	5.13112	16.0461
LSJ1	Male	2	4.1701	3.80979	12.4778
LSJ1	Male	2	5.07334	3.80118	15.1461
LSJ1	Male	2	4.50812	5.22739	18.5085
LSJ1	Male	2	3.75784	4.54431	13.4121
LSJ1	Male	2	4.39199	4.0208	13.8696
LSJ1	Male	3	4.66818	4.39106	16.0993
LSJ1	Male	3	4.5074	4.26398	15.0949
LSJ1	Male	3	4.78319	3.30678	12.4226
LSJ1	Male	3	4.73424	4.57579	17.014
LSJ1	Male	3	4.79535	4.68478	17.6441
LSJ1	Male	3	4.48293	4.92186	17.3293
LSJ1	Male	3	4.7027	4.837	17.8654
LSJ1	Male	3	4.42483	4.5074	15.6644
LSJ1	Male	3	4.5074	4.74653	16.8032
LSJ1	Male	3	3.92913	4.88624	15.0786
LSJ1	Male	3	4.38959	4.76422	16.425
LSJ1	Male	3	4.58568	4.51601	16.2648
LSJ1	Male	3	4.55026	4.07306	14.5562
LSJ1	Male	3	3.74188	4.54172	13.3475
LSJ1	Male	3	4.77913	5.05161	18.9613
LSJ1	Male	4	5.36589	5.15055	21.7063
LSJ1	Male	4	5.19309	4.546	18.5415
LSJ1	Male	4	4.85036	4.35556	16.5923
LSJ1	Male	4	5.01691	4.76422	18.7723
LSJ1	Male	4	4.3362	5.55547	18.92
LSJ1	Male	4	5.59724	4.98716	21.9239
LSJ1	Male	4	4.55595	4.90342	17.5456
LSJ1	Male	4	5.02593	4.68617	18.498
LSJ1	Male	4	5.64788	5.40434	23.9727
LSJ1	Male	4	5.14426	4.96636	20.0656
LSJ1	Male	4	5.9871	4.16573	19.5883
LSJ1	Male	4	5.04905	5.11272	20.2746
LSJ1	Male	4	4.46993	5.54031	19.4502
LSJ1	Male	4	5.31865	4.61942	19.2965
LSJ1	Male	4	4.64177	4.50453	16.4219
LSJ1	Male	5	4.18278	4.25942	13.9928
LSJ1	Male	5	4.51601	4.26398	15.1237
LSJ1	Male	5	4.83967	4.85968	18.472
LSJ1	Male	5	5.27836	5.39595	22.3695
LSJ1	Male	5	5.52862	5.36589	23.2996
LSJ1	Male	5	4.92186	4.82762	18.6618
LSJ1	Male	5	5.0375	5.08735	20.1278
LSJ1	Male	5	5.47215	4.67649	20.0987
LSJ1	Male	5	4.93892	4.91265	19.0563
LSJ1	Male	5	4.98586	4.95593	19.4068
LSJ1	Male	5	4.75334	5.61916	20.9778
LSJ1	Male	5	4.46993	4.69031	16.4661
LSJ1	Male	5	4.68478	4.78319	17.5994
LSJ1	Male	5	4.90078	4.43651	17.0764
LSJ1	Male	5	4.83967	5.08735	19.3374
LSJ1	Male	6	5.15055	5.36951	21.7209
LSJ1	Male	6	5.1881	5.1881	21.1401
LSJ1	Male	6	5.14426	4.57579	18.4875
LSJ1	Male	6	4.98586	5.60186	21.9363
LSJ1	Male	6	4.66957	4.99494	18.3188
LSJ1	Male	6	4.546	4.80074	17.1407
LSJ1	Male	6	5.25994	5.00141	20.6616
LSJ1	Male	6	4.61942	4.73424	17.1762
LSJ1	Male	6	5.03879	4.47716	17.7182
LSJ1	Male	6	4.64317	4.83298	17.6246
LSJ1	Male	6	4.43067	4.66541	16.2349
LSJ1	Male	6	6.36732	3.88775	19.4422
LSJ1	Male	6	5.14867	4.90738	19.8442
LSJ1	Male	6	5.42704	5.15055	21.9536
LSJ1	Male	6	4.7027	5.05161	18.6581
LSJ1	Male	7	4.48726	4.90738	17.295
LSJ1	Male	7	4.89286	5.30282	20.3779
LSJ1	Male	7	4.44234	4.12201	14.3817
LSJ1	Male	7	4.82896	4.30024	16.3094
LSJ1	Male	7	4.66957	4.546	16.6723
LSJ1	Male	7	5.24022	5.42704	22.3358
LSJ1	Male	7	4.81151	4.82896	18.2484
LSJ1	Male	7	4.89286	4.95984	19.0599
LSJ1	Male	7	5.54031	4.98975	21.7122
LSJ1	Male	7	5.1881	3.66325	14.9267
LSJ1	Male	7	5.00658	4.77913	18.7923
LSJ1	Male	7	5.02851	5.09371	20.117
LSJ1	Male	7	5.34172	5.04905	21.1827
LSJ1	Male	7	4.26398	4.34663	14.5565
LSJ1	Male	7	5.23837	5.08353	20.9147
LSJ1	Male	8	4.7994	4.60258	17.3491
LSJ1	Male	8	5.43776	4.98586	21.2936
LSJ1	Male	8	4.60679	4.57579	16.556
LSJ1	Male	8	4.83967	5.29305	20.1192
LSJ1	Male	8	4.69031	5.30282	19.5343
LSJ1	Male	8	4.58568	4.85036	17.469
LSJ1	Male	8	5.07334	5.2105	20.7617
LSJ1	Male	8	4.27004	4.66818	15.6556
LSJ1	Male	8	4.66402	4.64038	16.9982
LSJ1	Male	8	4.0219	4.28215	13.5264
LSJ1	Male	8	4.78319	4.66402	17.5214
LSJ1	Male	8	5.0375	4.89682	19.374
LSJ1	Male	8	4.80074	4.73424	17.8504
LSJ1	Male	8	4.34366	4.42483	15.0953
LSJ1	Male	8	5.18061	4.82896	19.6483
LSJ1	Male	9	4.30024	4.44234	15.0036
LSJ1	Male	9	4.58568	5.20926	18.7616
LSJ1	Male	9	4.43067	4.77913	16.6306
LSJ1	Male	9	4.58568	4.33172	15.6011
LSJ1	Male	9	4.39401	4.43651	15.3106
LSJ1	Male	9	5.01046	4.10943	16.1715
LSJ1	Male	9	4.78454	4.90078	18.416
LSJ1	Male	9	4.63061	4.78454	17.4008
LSJ1	Male	9	3.5973	4.05076	11.4447
LSJ1	Male	9	3.79681	3.68438	10.9869
LSJ1	Male	9	4.3763	4.36001	14.986
LSJ1	Male	9	5.11905	4.92186	19.7883
LSJ1	Male	9	4.37039	4.26398	14.6361
LSJ1	Male	9	4.60258	4.89286	17.687
LSJ1	Male	9	4.10943	3.21752	10.3847
LSJ2	Male	1	3.94229	4.02512	12.4628
LSJ2	Male	1	4.89682	4.93892	18.9949
LSJ2	Male	1	4.21053	4.25942	14.0857
LSJ2	Male	1	3.8694	3.81551	11.5954
LSJ2	Male	1	4.77913	5.24392	19.6832
LSJ2	Male	1	3.64199	4.19514	11.9998
LSJ2	Male	1	4.16573	3.98148	13.0264
LSJ2	Male	1	4.10943	3.76773	12.1605
LSJ2	Male	1	4.55026	4.93892	17.6506
LSJ2	Male	1	3.029	2.96641	7.05701
LSJ2	Male	1	4.12201	4.16573	13.4862
LSJ2	Male	1	3.53196	4.0219	11.1567
LSJ2	Male	1	3.5973	4.12358	11.6504
LSJ2	Male	1	3.92913	4.12358	12.7251
LSJ2	Male	1	4.77507	5.06824	19.0076
LSJ2	Male	2	4.18278	4.43067	14.5554
LSJ2	Male	2	4.80074	4.16573	15.7069
LSJ2	Male	2	5.24392	6.19425	25.5114
LSJ2	Male	2	6.03768	5.39595	25.5875
LSJ2	Male	2	5.50281	6.20678	26.825
LSJ2	Male	2	4.33172	5.76691	19.6198
LSJ2	Male	2	4.67649	5.47215	20.0987
LSJ2	Male	2	3.51359	4.83298	13.3369
LSJ2	Male	2	4.0074	4.08416	12.8545
LSJ2	Male	2	4.33172	4.85968	16.5333
LSJ2	Male	2	4.80074	5.34172	20.1409
LSJ2	Male	2	3.71934	3.43914	10.0463
LSJ2	Male	2	4.65508	4.47734	16.3696
LSJ2	Male	2	4.63549	4.65743	16.9563
LSJ2	Male	2	4.93737	4.70176	18.2325
LSJ2	Male	3	4.77913	4.68617	17.5896
LSJ2	Male	3	4.44961	4.60117	16.0798
LSJ2	Male	3	4.78454	4.78454	17.9792
LSJ2	Male	3	4.7137	5.08735	18.834
LSJ2	Male	3	5.15055	5.26977	21.3174
LSJ2	Male	3	4.77913	4.61942	17.3391
LSJ2	Male	3	4.42483	5.47924	19.0417
LSJ2	Male	3	4.89682	5.23775	20.1441
LSJ2	Male	3	4.29271	5.09371	17.1734
LSJ2	Male	3	4.39548	4.22127	14.5727
LSJ2	Male	3	4.67649	4.76286	17.4935
LSJ2	Male	3	4.76286	5.02851	18.8103
LSJ2	Male	3	4.07306	4.23352	13.5429
LSJ2	Male	3	5.15934	4.64038	18.8034
LSJ2	Male	3	4.30024	4.03475	13.627
LSJ2	Male	4	5.33202	5.18061	21.6951
LSJ2	Male	4	4.91134	4.78319	18.4505
LSJ2	Male	4	4.77913	4.43797	16.658
LSJ2	Male	4	5.4437	4.57862	19.5758
LSJ2	Male	4	4.98716	4.74653	18.5917
LSJ2	Male	4	4.94416	5.96978	23.1815
LSJ2	Male	4	4.48293	4.7027	16.5577
LSJ2	Male	4	5.10893	4.82896	19.3764
LSJ2	Male	4	4.75062	5.18061	19.3295
LSJ2	Male	4	5.51338	4.43651	19.211
LSJ2	Male	4	5.49811	4.88492	21.0941
LSJ2	Male	4	4.99753	5.05161	19.8278
LSJ2	Male	4	5.2105	4.93892	20.2116
LSJ2	Male	4	5.00529	4.77913	18.7875
LSJ2	Male	4	5.19807	5.80159	23.6853
LSJ2	Male	5	5.18061	5.66732	23.0594
LSJ2	Male	5	4.56871	5.38034	19.306
LSJ2	Male	5	4.7994	4.74107	17.8712
LSJ2	Male	5	5.02207	4.69858	18.5327
LSJ2	Male	5	4.82896	5.31135	20.1441
LSJ2	Male	5	3.66325	4.5074	12.9683
LSJ2	Male	5	4.7137	4.28215	15.8531
LSJ2	Male	5	5.11905	4.7137	18.9514
LSJ2	Male	5	5.11905	4.41751	17.7605
LSJ2	Male	5	5.68783	4.93892	22.0632
LSJ2	Male	5	5.52276	5.50751	23.8892
LSJ2	Male	5	3.30678	3.55387	9.22989
LSJ2	Male	5	5.15934	4.64038	18.8034
LSJ2	Male	5	5.31135	5.15055	21.4856
LSJ2	Male	5	4.12044	5.47924	17.7319
LSJ2	Male	6	4.92318	4.82762	18.6668
LSJ2	Male	6	4.7994	4.67649	17.6277
LSJ2	Male	6	4.0219	3.70015	11.688
LSJ2	Male	6	5.63067	5.66161	25.0374
LSJ2	Male	6	5.69806	5.64788	25.2756
LSJ2	Male	6	4.85968	5.17061	19.7351
LSJ2	Male	6	5.01691	5.50281	21.6826
LSJ2	Male	6	5.51808	6.11541	26.5035
LSJ2	Male	6	5.36589	4.83967	20.3961
LSJ2	Male	6	4.48726	4.48726	15.8144
LSJ2	Male	6	4.2503	4.44234	14.8293
LSJ2	Male	6	4.02512	4.1408	13.0904
LSJ2	Male	6	3.92913	3.81382	11.7692
LSJ2	Male	6	4.44961	3.97335	13.8857
LSJ2	Male	6	4.83298	4.67649	17.7511
LSJ2	Male	7	5.59724	5.56478	24.4631
LSJ2	Male	7	4.76422	5.01691	18.7723
LSJ2	Male	7	5.08735	5.53564	22.1182
LSJ2	Male	7	4.5074	5.48986	19.4347
LSJ2	Male	7	4.82896	5.33081	20.2179
LSJ2	Male	7	4.07306	3.71411	11.8814
LSJ2	Male	7	4.56304	4.20899	15.0842
LSJ2	Male	7	4.38959	4.73424	16.3217
LSJ2	Male	7	5.72072	5.25994	23.6331
LSJ2	Male	7	4.66957	5.05289	18.5313
LSJ2	Male	7	5.19807	5.97845	24.4073
LSJ2	Male	7	5.36589	5.25994	22.1673
LSJ2	Male	7	4.60117	3.90932	14.1273
LSJ2	Male	7	5.46269	5.15055	22.0978
LSJ2	Male	7	4.1408	3.86438	12.5676
LSJ2	Male	8	4.42483	5.55547	19.3066
LSJ2	Male	8	4.82896	7.99621	30.3269
LSJ2	Male	8	6.26901	5.15934	25.4029
LSJ2	Male	8	5.23775	5.60302	23.0492
LSJ2	Male	8	5.18935	5.24885	21.3928
LSJ2	Male	8	5.44727	5.29305	22.6451
LSJ2	Male	8	5.38995	4.98975	21.1229
LSJ2	Male	8	5.56478	4.85036	21.1988
LSJ2	Male	8	5.96111	5.15055	24.1141
LSJ2	Male	8	5.0375	5.4615	21.6081
LSJ2	Male	8	6.50007	6.03875	30.8287
LSJ2	Male	8	4.7994	4.64038	17.4916
LSJ2	Male	8	5.91644	5.4615	25.3783
LSJ2	Male	8	4.28819	4.96896	16.7351
LSJ2	Male	8	4.80074	4.78454	18.0401
LSJ2	Male	9	4.64177	4.91265	17.9098
LSJ2	Male	9	3.94229	3.86103	11.9548
LSJ2	Male	9	4.32425	4.35556	14.7926
LSJ2	Male	9	4.95984	4.82896	18.811
LSJ2	Male	9	3.38223	3.94229	10.4723
LSJ2	Male	9	4.19514	4.30024	14.1687
LSJ2	Male	9	4.27459	4.27459	14.3509
LSJ2	Male	9	4.43651	3.86772	13.4768
LSJ2	Male	9	3.83749	4.5074	13.5851
LSJ2	Male	9	4.58003	4.18278	15.0461
LSJ2	Male	9	4.12201	4.23199	13.7007
LSJ2	Male	9	4.23199	4.57579	15.209
LSJ2	Male	9	4.39106	4.75062	16.3836
LSJ2	Male	9	4.46123	4.28819	15.0251
LSJ2	Male	9	4.32425	3.97986	13.5166
LSJ2	Male	10	4.37039	5.15808	17.7051
LSJ2	Male	10	4.837	4.77913	18.1558
LSJ2	Male	10	4.60679	5.0375	18.2265
LSJ2	Male	10	4.57579	4.85968	17.4648
LSJ2	Male	10	4.80074	4.75198	17.9173
LSJ2	Male	10	4.69858	5.36589	19.8015
LSJ2	Male	10	4.55026	5.07971	18.1537
LSJ2	Male	10	4.77913	5.96436	22.3874
LSJ2	Male	10	5.14426	4.03154	16.2886
LSJ2	Male	10	4.53031	3.98148	14.1665
LSJ2	Male	10	4.95593	4.78995	18.6443
LSJ2	Male	10	4.64317	4.43067	16.1575
LSJ2	Male	10	4.60117	4.67649	16.8997
LSJ2	Male	10	4.68478	4.57579	16.8363
LSJ2	Male	10	4.21053	4.77913	15.8043
LSJ2	Male	11	4.90738	5.31135	20.4713
LSJ2	Male	11	4.58568	6.55558	23.6105
LSJ2	Male	11	4.39106	5.08353	17.5318
LSJ2	Male	11	5.08353	5.25871	20.9959
LSJ2	Male	11	5.30647	4.99494	20.8174
LSJ2	Male	11	5.08353	5.30282	21.172
LSJ2	Male	11	5.47097	5.80605	24.948
LSJ2	Male	11	4.83967	5.18935	19.7251
LSJ2	Male	11	4.5074	5.59724	19.8148
LSJ2	Male	11	4.03475	3.98148	12.6169
LSJ2	Male	11	5.20926	5.69806	23.3127
LSJ2	Male	11	5.04905	5.49104	21.7748
LSJ2	Male	11	4.3763	6.61845	22.7485
LSJ2	Male	11	4.71919	4.78319	17.7286
LSJ2	Male	11	5.07334	4.85968	19.3639
LSJ2	Male	12	4.92318	4.42483	17.1093
LSJ2	Male	12	4.82762	4.41751	16.7495
LSJ2	Male	12	5.39475	5.55081	23.5189
LSJ2	Male	12	4.32275	4.77778	16.2209
LSJ2	Male	12	4.78454	4.3763	16.4452
LSJ2	Male	12	4.97547	5.72072	22.355
LSJ2	Male	12	4.48149	4.52888	15.9406
LSJ2	Male	12	4.73424	4.90738	18.247
LSJ2	Male	12	4.52888	4.98586	17.7346
LSJ2	Male	12	3.78145	4.66541	13.856
LSJ2	Male	12	4.99753	5.01046	19.6663
LSJ2	Male	12	5.31135	6.0974	25.4354
LSJ2	Male	12	4.82896	4.88624	18.5318
LSJ2	Male	12	5.38995	5.8194	24.635
LSJ2	Male	12	4.98716	4.98975	19.5444
LSJ2	Male	13	4.10313	4.39106	14.1506
LSJ2	Male	13	3.86772	4.74107	14.402
LSJ2	Male	13	3.72629	4.57862	13.3999
LSJ2	Male	13	4.98586	4.93892	19.3403
LSJ2	Male	13	4.66957	4.56304	16.7348
LSJ2	Male	13	4.48149	4.53031	15.9456
LSJ2	Male	13	3.66325	3.35919	9.66475
LSJ2	Male	13	5.15808	5.38995	21.8355
LSJ2	Male	13	4.60258	4.37039	15.7983
LSJ2	Male	13	4.66541	4.37039	16.014
LSJ2	Male	13	3.48028	3.8627	10.5583
LSJ2	Male	13	5.33081	5.31865	22.2682
LSJ2	Male	13	3.92254	4.10155	12.6359
LSJ2	Male	13	4.35407	4.22281	14.4406
LSJ2	Male	13	4.78454	4.57579	17.1948
LSJ2	Male	14	3.78657	3.94885	11.7437
LSJ2	Male	14	5.05161	5.02851	19.9507
LSJ2	Male	14	4.85036	4.19514	15.9812
LSJ2	Male	14	4.50022	4.92843	17.4194
LSJ2	Male	14	5.07844	5.45202	21.7459
LSJ2	Male	14	4.82092	4.27459	16.185
LSJ2	Male	14	5.7128	5.56478	24.9682
LSJ2	Male	14	3.09451	4.03475	9.80617
LSJ2	Male	14	3.75569	3.64199	10.7428
LSJ2	Male	14	3.88275	4.32425	13.1868
LSJ2	Male	14	5.50281	5.46269	23.6092
LSJ2	Male	14	5.02851	4.91265	19.4019
LSJ2	Male	14	4.45978	4.10313	14.3721
LSJ2	Male	14	4.85968	5.61916	21.4471
LSJ2	Male	14	4.43067	5.01046	17.4356
LSJ2	Male	15	3.83929	3.86856	11.6651
LSJ2	Male	15	3.75397	4.12711	12.1682
LSJ2	Male	15	3.76945	3.95785	11.7173
LSJ2	Male	15	3.83169	3.77813	11.3699
LSJ2	Male	15	3.323	3.01884	7.87881
LSJ2	Male	15	4.10943	3.80501	12.2808
LSJ2	Male	15	3.25998	3.52393	9.0226
LSJ2	Male	15	4.20226	3.87326	12.7835
LSJ2	Male	15	3.59246	3.85442	10.8753
LSJ2	Male	15	3.35244	3.74815	9.86888
LSJ2	Male	15	3.62975	4.02713	11.4805
LSJ2	Male	15	3.3784	3.3784	8.96421
LSJ2	Male	15	3.02967	3.17514	7.55524
LSJ2	Male	15	3.1579	3.2933	8.16806
LSJ2	Male	15	3.48133	3.45509	9.44702
CC1	Male	1	4.7846	4.56756	17.164
CC1	Male	1	5.70347	5.34173	23.9282
CC1	Male	1	6.32151	5.18269	25.7316
CC1	Male	1	5.39599	5.22313	22.1356
CC1	Male	1	6.74486	5.58488	29.5853
CC1	Male	1	5.70296	5.01052	22.4426
CC1	Male	1	4.02084	3.64476	11.51
CC1	Male	1	5.07332	5.30419	21.1349
CC1	Male	1	5.13748	4.97042	20.0555
CC1	Male	1	6.05208	5.676	26.9797
CC1	Male	1	6.20531	5.35538	26.1002
CC1	Male	1	4.89586	4.42422	17.012
CC1	Male	1	6.11726	5.91711	28.4287
CC1	Male	1	7.66765	6.34165	38.1904
CC1	Male	1	4.26673	4.44385	14.8917
CC1	Male	2	4.7846	4.28379	16.0977
CC1	Male	2	7.64342	7.2885	43.7538
CC1	Male	2	5.90414	4.96019	23.0009
CC1	Male	2	7.24038	6.3942	36.3612
CC1	Male	2	6.54334	6.93648	35.6474
CC1	Male	2	6.10122	6.29336	30.1571
CC1	Male	2	7.90517	7.84784	48.725
CC1	Male	2	6.45546	5.39599	27.3582
CC1	Male	2	4.45374	4.87504	17.0527
CC1	Male	2	5.93673	6.40103	29.8461
CC1	Male	2	7.48456	6.72216	39.5153
CC1	Male	2	6.5517	6.76653	34.8185
CC1	Male	2	6.83393	6.26554	33.6294
CC1	Male	2	6.03399	5.26562	24.9542
CC1	Male	2	6.58668	6.89382	35.6629
CC1	Male	3	5.75176	5.4523	24.6303
CC1	Male	3	5.26562	4.7387	19.5974
CC1	Male	3	4.43975	5.56202	19.3946
CC1	Male	3	5.37227	4.82624	20.3637
CC1	Male	3	5.42892	5.15454	21.9783
CC1	Male	3	5.13748	5.61935	22.6739
CC1	Male	3	5.55604	3.98347	17.3827
CC1	Male	3	5.93673	5.29787	24.7024
CC1	Male	3	6.43737	5.05113	25.538
CC1	Male	3	6.9991	5.65552	31.0889
CC1	Male	3	4.3546	3.85823	13.1955
CC1	Male	3	4.88033	5.56202	21.3192
CC1	Male	3	4.98356	4.99312	19.5435
CC1	Male	3	5.78469	5.46305	24.8202
CC1	Male	3	5.25163	5.72651	23.6197
CC1	Male	4	5.77958	5.42022	24.6038
CC1	Male	4	5.88929	5.75688	26.6281
CC1	Male	4	4.79672	4.8119	18.1281
CC1	Male	4	6.21128	5.70296	27.8209
CC1	Male	4	4.95285	5.91898	23.0246
CC1	Male	4	6.29267	5.44496	26.9104
CC1	Male	4	5.76951	5.72651	25.9489
CC1	Male	4	4.04251	4.97486	15.7951
CC1	Male	4	4.01077	5.03663	15.8657
CC1	Male	4	4.37201	5.42278	18.6206
CC1	Male	4	4.23584	4.59452	15.2851
CC1	Male	4	5.62635	4.88033	21.5658
CC1	Male	4	4.09609	4.59213	14.7732
CC1	Male	4	5.30419	6.81738	28.4005
CC1	Male	4	4.54196	5.91711	21.1078
CC1	Male	5	5.06837	4.76106	18.9523
CC1	Male	5	5.09055	4.9049	19.6103
CC1	Male	5	5.13679	5.25726	21.21
CC1	Male	5	5.30487	4.3604	18.1673
CC1	Male	5	5.30896	4.94688	20.6267
CC1	Male	5	5.73913	5.26067	23.7125
CC1	Male	5	5.25163	4.76635	19.6594
CC1	Male	5	5.27654	5.61355	23.2636
CC1	Male	5	4.608	3.93945	14.2573
CC1	Male	5	5.23849	4.97042	20.4498
CC1	Male	5	5.15454	4.51534	18.2798
CC1	Male	5	4.52183	4.3703	15.5208
CC1	Male	5	4.80354	4.85781	18.327
CC1	Male	5	5.86404	5.39189	24.8329
CC1	Male	5	5.58949	4.65509	20.4357
CC1	Male	6	4.42746	5.17348	17.9899
CC1	Male	6	4.8863	6.07426	23.3111
CC1	Male	6	5.84783	6.22118	28.5731
CC1	Male	6	5.87701	5.95328	27.4791
CC1	Male	6	5.37568	5.3233	22.4752
CC1	Male	6	5.82292	5.683	25.9901
CC1	Male	6	4.82777	5.25726	19.9341
CC1	Male	6	5.23849	5.79783	23.854
CC1	Male	6	5.91404	4.96019	23.0394
CC1	Male	6	6.1316	5.39667	25.989
CC1	Male	6	3.51781	4.0461	11.1789
CC1	Male	6	5.2489	4.94841	20.3997
CC1	Male	6	6.3942	5.5371	27.8073
CC1	Male	6	3.85447	4.61738	13.9782
CC1	Male	6	6.29848	5.45827	27.001
CC1	Male	7	3.86283	3.0774	9.33641
CC1	Male	7	5.15863	4.42508	17.9286
CC1	Male	7	3.6207	2.75149	7.82439
CC1	Male	7	2.78954	3.39666	7.44174
CC1	Male	7	4.01077	3.93672	12.4009
CC1	Male	7	4.26587	4.05599	13.5892
CC1	Male	7	5.72651	4.23584	19.0511
CC1	Male	7	4.77846	2.84756	10.6869
CC1	Male	7	3.80123	3.0774	9.18753
CC1	Male	7	4.8503	4.37781	16.6769
CC1	Male	7	4.61431	3.47396	12.5899
CC1	Male	7	3.90788	4.67386	14.3452
CC1	Male	7	3.53931	3.93945	10.9507
CC1	Male	7	4.35034	3.93023	13.4286
CC1	Male	7	6.23415	4.62984	22.669
CC1	Male	8	4.69946	4.78989	17.6792
CC1	Male	8	5.58744	4.88988	21.4586
CC1	Male	8	5.2204	5.29583	21.7134
CC1	Male	8	4.95507	4.61977	17.9788
CC1	Male	8	5.29583	5.13679	21.3656
CC1	Male	8	3.17398	3.19804	7.9722
CC1	Male	8	6.94433	4.5865	25.015
CC1	Male	8	4.60168	5.2489	18.9703
CC1	Male	8	3.85823	3.12433	9.46747
CC1	Male	8	5.01052	5.33081	20.9781
CC1	Male	8	5.46305	5.13748	22.0432
CC1	Male	8	5.51663	5.11905	22.1795
CC1	Male	8	5.84476	5.27723	24.2249
CC1	Male	8	3.51047	4.31758	11.9041
CC1	Male	8	5.31511	4.91292	20.5089
CC1	Male	9	4.49606	4.58257	16.182
CC1	Male	9	5.24412	4.76942	19.6439
CC1	Male	9	5.48489	5.34446	23.023
CC1	Male	9	5.31442	5.47158	22.838
CC1	Male	9	5.8869	5.74733	26.5731
CC1	Male	9	5.80978	5.34173	24.3742
CC1	Male	9	5.71883	5.99406	26.9227
CC1	Male	9	5.941	5.8422	27.26
CC1	Male	9	6.01113	6.0456	28.542
CC1	Male	9	5.9729	5.81165	27.2631
CC1	Male	9	6.48464	5.92632	30.1829
CC1	Male	9	5.22313	4.53462	18.6021
CC1	Male	9	5.61082	5.19379	22.8876
CC1	Male	9	6.25667	5.8968	28.9768
CC1	Male	9	5.69136	6.10788	27.3021
CC1	Male	10	4.1094	3.57207	11.5289
CC1	Male	10	7.37143	6.72711	38.9467
CC1	Male	10	5.32671	5.3994	22.5889
CC1	Male	10	5.62447	6.88956	30.4342
CC1	Male	10	5.0798	6.58941	26.2895
CC1	Male	10	5.42022	5.762	24.529
CC1	Male	10	5.94168	5.85465	27.3212
CC1	Male	10	5.60826	6.88119	30.3097
CC1	Male	10	6.3942	7.17332	36.0244
CC1	Male	10	6.99654	6.54334	35.9561
CC1	Male	10	6.43567	5.55553	28.0808
CC1	Male	10	6.77455	5.66252	30.1287
CC1	Male	10	7.82037	5.56202	34.1625
CC1	Male	10	5.12041	5.23781	21.0642
CC1	Male	10	3.22961	5.13679	13.0296
CC1	Male	11	5.26767	6.03826	24.9816
CC1	Male	11	5.50417	6.61142	28.5809
CC1	Male	11	3.68452	4.09882	11.8612
CC1	Male	11	5.82292	6.39488	29.2458
CC1	Male	11	5.73589	6.61142	29.7842
CC1	Male	11	4.34778	4.69485	16.0317
CC1	Male	11	5.84783	6.26486	28.7737
CC1	Male	11	4.69246	5.49018	20.2338
CC1	Male	11	3.69135	3.78963	10.9868
CC1	Male	11	4.18141	4.27355	14.0346
CC1	Male	11	5.08833	5.09192	20.3492
CC1	Male	11	5.85465	5.61082	25.7999
CC1	Male	11	5.81473	5.21273	23.8059
CC1	Male	11	5.87138	5.32603	24.5603
CC1	Male	11	6.90696	7.31188	39.6648
CC1	Hermaphrodite	1	5.07332	4.264	16.9902
CC1	Hermaphrodite	1	3.66319	3.53385	10.1671
CC1	Hermaphrodite	1	3.91437	3.82393	11.756
CC1	Hermaphrodite	1	3.86096	3.78144	11.4668
CC1	Hermaphrodite	1	3.94406	3.74817	11.6105
CC1	Hermaphrodite	1	4.80815	3.89474	14.7078
CC1	Hermaphrodite	1	3.84969	3.13252	9.4713
CC1	Hermaphrodite	1	3.28216	3.57207	9.2081
CC1	Hermaphrodite	1	4.20905	4.12203	13.6265
CC1	Hermaphrodite	2	4.34539	3.86283	13.1833
CC1	Hermaphrodite	2	3.36219	2.88697	7.62351
CC1	Hermaphrodite	2	3.98142	3.86096	12.0732
CC1	Hermaphrodite	2	4.3041	4.11827	13.9215
CC1	Hermaphrodite	2	4.28379	4.40767	14.8295
CC1	Hermaphrodite	2	4.01077	3.99815	12.5944
CC1	Hermaphrodite	2	3.90788	3.80123	11.6669
CC1	Hermaphrodite	2	4.73563	3.16272	11.7633
CC1	Hermaphrodite	2	3.78656	4.03961	12.0136
CC1	Hermaphrodite	2	3.89116	3.78827	11.5774
CC1	Hermaphrodite	2	5.0066	3.61524	14.2158
CC1	Hermaphrodite	2	3.86437	3.94235	11.9653
CC1	Hermaphrodite	3	4.21519	4.15172	13.7447
CC1	Hermaphrodite	3	4.11827	4.0461	13.087
CC1	Hermaphrodite	3	4.45118	5.16512	18.057
CC1	Hermaphrodite	3	4.89688	5.12417	19.7076
CC1	Hermaphrodite	3	4.33617	5.2204	17.7787
CC1	Hermaphrodite	3	3.4127	3.31663	8.88966
CC1	Hermaphrodite	3	4.10155	3.71404	11.9642
CC1	Hermaphrodite	3	4.69024	4.8863	17.9997
CC1	Hermaphrodite	3	4.2384	4.1094	13.6795
CC1	Hermaphrodite	3	4.02715	4.31758	13.6561
CC1	Hermaphrodite	3	4.38122	4.20922	14.484
CC1	Hermaphrodite	3	4.65594	4.9996	18.2824
CC1	Hermaphrodite	3	4.80081	4.45971	16.8156
CC1	Hermaphrodite	3	4.23669	4.2872	14.2656
CC1	Hermaphrodite	3	4.73256	5.01854	18.6536
CC1	Hermaphrodite	3	4.26673	3.54869	11.892
CC1	Hermaphrodite	4	4.46671	4.37781	15.358
CC1	Hermaphrodite	4	4.89961	5.06837	19.5038
CC1	Hermaphrodite	4	4.74416	5.17075	19.2665
CC1	Hermaphrodite	4	4.52882	5.14055	18.2846
CC1	Hermaphrodite	4	5.39479	5.49462	23.281
CC1	Hermaphrodite	4	5.14533	5.18833	20.9667
CC1	Hermaphrodite	4	4.18585	4.50732	14.8181
CC1	Hermaphrodite	4	3.78144	3.78144	11.2306
CC1	Hermaphrodite	4	4.80081	5.15812	19.449
CC1	Hermaphrodite	4	4.58496	4.62455	16.6531
CC1	Hermaphrodite	4	5.09874	5.14806	20.6156
CC1	Hermaphrodite	4	4.32423	4.67642	15.8823
CC1	Hermaphrodite	4	5.74323	5.68556	25.646
CC1	Hermaphrodite	5	4.0507	4.41757	14.0541
CC1	Hermaphrodite	5	3.78144	3.8828	11.5317
CC1	Hermaphrodite	5	3.75567	3.98142	11.744
CC1	Hermaphrodite	5	4.00736	4.02187	12.6583
CC1	Hermaphrodite	5	4.34658	4.1408	14.1358
CC1	Hermaphrodite	5	4.65509	3.88075	14.1884
CC1	Hermaphrodite	5	4.7643	3.96197	14.8252
CC1	Hermaphrodite	5	3.53931	3.71404	10.3242
CC1	Hermaphrodite	6	4.17015	3.77905	12.3772
CC1	Hermaphrodite	6	3.9734	4.16571	13
CC1	Hermaphrodite	6	4.0507	4.61943	14.6963
CC1	Hermaphrodite	7	3.81382	3.48028	10.4247
CC1	Hermaphrodite	7	4.56304	4.34663	15.5775
CC1	Hermaphrodite	7	3.97213	3.47144	10.8299
CC1	Hermaphrodite	7	4.44234	3.98676	13.9098
CC1	Hermaphrodite	7	4.65743	4.41751	16.159
CC1	Hermaphrodite	7	3.98351	3.86856	12.1033
CC1	Hermaphrodite	7	3.91429	3.82398	11.756
CC1	Hermaphrodite	7	3.86772	3.76086	11.4244
CC1	Hermaphrodite	7	3.61524	3.37648	9.5872
CC1	Hermaphrodite	7	4.25068	4.17543	13.9396
CC1	Hermaphrodite	7	4.30362	3.86814	13.0746
CC1	Hermaphrodite	7	3.39464	3.49235	9.3111
CC1	Hermaphrodite	7	4.10943	3.64776	11.7733
CC1	Hermaphrodite	7	3.68449	3.36545	9.7389
CC1	Hermaphrodite	7	4.65743	4.99526	18.2723
CC1	Hermaphrodite	8	3.45193	3.51773	9.53706
CC1	Hermaphrodite	8	4.5178	4.23677	15.0332
CC1	Hermaphrodite	8	4.69031	4.42519	16.3013
CC1	Hermaphrodite	8	4.63061	4.48726	16.3196
CC1	Hermaphrodite	8	4.0074	4.10155	12.9092
CC1	Hermaphrodite	8	3.91439	3.54863	10.9098
CC1	Hermaphrodite	8	4.67649	4.47282	16.4282
CC1	Hermaphrodite	8	4.00992	3.59955	11.3364
CC1	Hermaphrodite	8	4.97482	4.33443	16.9355
CC1	Hermaphrodite	8	5.11122	4.56349	18.3194
CC1	Hermaphrodite	8	4.25049	4.09968	13.6861
CC1	Hermaphrodite	8	4.1174	4.19446	13.564
CC1	Hermaphrodite	8	4.12201	4.17194	13.5063
CC1	Hermaphrodite	8	4.46123	4.33172	15.1777
CC1	Hermaphrodite	8	4.27354	4.09968	13.7603
CC1	Hermaphrodite	9	3.87441	4.06988	12.3845
CC1	Hermaphrodite	9	4.83298	4.82762	18.3248
CC1	Hermaphrodite	9	3.15457	3.46538	8.58579
CC1	Hermaphrodite	9	4.33172	4.77913	16.2592
CC1	Hermaphrodite	9	3.66545	3.70015	10.6521
CC1	Hermaphrodite	9	4.21437	3.96846	13.1354
CC1	Hermaphrodite	9	4.59449	4.46993	16.1297
CC1	Hermaphrodite	9	3.70419	3.86291	11.2382
CC1	Hermaphrodite	9	3.99446	3.7394	11.7314
CC1	Hermaphrodite	9	3.45509	3.59955	9.76782
CC1	Hermaphrodite	9	3.55171	3.60056	10.0438
CC1	Hermaphrodite	10	5.20926	5.07971	20.7828
CC1	Hermaphrodite	10	4.82628	4.2274	16.0242
CC1	Hermaphrodite	10	4.85968	5.32595	20.328
CC1	Hermaphrodite	10	4.50489	4.05325	14.3409
CC1	Hermaphrodite	10	4.77854	4.47653	16.8006
CC1	Hermaphrodite	10	5.39932	4.09702	17.3739
CC1	Hermaphrodite	10	4.16311	4.94841	16.1798
CC1	Hermaphrodite	10	3.18544	3.23757	8.09988
CC1	Hermaphrodite	10	3.70124	3.13708	9.11935
CC1	Hermaphrodite	10	3.67757	3.07261	8.8748
CC1	Hermaphrodite	10	4.47282	4.00094	14.0551
CC1	Hermaphrodite	10	3.7394	4.04246	11.8724
CC1	Hermaphrodite	10	3.90787	3.66964	11.263
CC1	Hermaphrodite	10	4.5571	3.83929	13.7413
CC1	Hermaphrodite	10	4.64569	4.04696	14.7662
CC1	Hermaphrodite	10	4.40357	4.78082	16.5348
CC1	Hermaphrodite	10	4.01083	4.25049	13.3895
CC1	Hermaphrodite	10	4.30663	4.16573	14.0902
CC1	Hermaphrodite	11	4.2761	4.2274	14.1975
CC1	Hermaphrodite	11	4.19668	3.96846	13.0803
CC1	Hermaphrodite	11	3.66325	3.92254	11.2856
CC1	Hermaphrodite	11	4.98975	4.7994	18.8086
CC1	Hermaphrodite	11	4.7994	4.66957	17.6016
CC1	Hermaphrodite	11	3.80501	4.18404	12.5038
CC1	Hermaphrodite	11	4.30409	3.93294	13.295
CC1	Hermaphrodite	11	3.70539	3.88775	11.3142
CC1	Hermaphrodite	11	4.55595	4.23352	15.1485
CC1	Hermaphrodite	11	4.09879	4.20226	13.5279
CC1	Hermaphrodite	12	2.95676	2.95676	6.8663
CC1	Hermaphrodite	12	3.57207	3.19804	8.9721
CC1	Hermaphrodite	12	4.68546	4.05599	14.9259
CC1	Hermaphrodite	12	3.44341	3.74237	10.121
CC1	Hermaphrodite	12	3.34479	3.74032	9.82577
CC1	Hermaphrodite	12	3.66473	3.55586	10.2347
CC1	Hermaphrodite	12	4.10326	4.16656	13.4275
CC1	Hermaphrodite	12	3.64783	3.95788	11.3393
CC1	Hermaphrodite	12	3.68452	3.69339	10.688
CC1	Hermaphrodite	12	4.47729	3.19463	11.2338
CC1	Hermaphrodite	12	4.23669	4.25052	14.1436
CC1	Hermaphrodite	12	3.53061	3.54887	9.84076
CC1	Hermaphrodite	12	3.7695	4.32525	12.8052
CC1	Hermaphrodite	12	4.16042	4.45374	14.553
CC1	Hermaphrodite	12	3.22517	3.8241	9.68661
CC1	Hermaphrodite	12	4.30631	4.22748	14.2981
CC1	Hermaphrodite	13	3.34479	3.43932	9.03505
CC1	Hermaphrodite	13	3.86283	3.95225	11.9906
CC1	Hermaphrodite	13	3.35792	3.05829	8.06565
CC1	Hermaphrodite	13	3.77717	3.66473	10.8717
CC1	Hermaphrodite	13	4.46603	4.1024	14.3896
CC1	Hermaphrodite	13	3.98347	4.16042	13.0163
CC1	Hermaphrodite	13	4.58564	4.86907	17.5362
CC1	Hermaphrodite	13	4.83972	5.07963	19.3082
CC1	Hermaphrodite	14	4.95131	3.58743	13.9506
CC1	Hermaphrodite	14	3.64732	4.00088	11.4609
CC1	Hermaphrodite	14	3.92187	3.77137	11.6167
CC1	Hermaphrodite	14	3.20589	3.24326	8.1662
CC1	Hermaphrodite	14	5.15863	4.06401	16.4657
CC1	Hermaphrodite	14	3.66967	4.19711	12.0967
CC1	Hermaphrodite	14	5.25163	4.68546	19.3258
CC1	Hermaphrodite	14	4.34539	4.64178	15.8418
CC1	Hermaphrodite	14	4.14199	4.8119	15.6537
CC1	Hermaphrodite	14	4.64178	3.36219	12.2574
CC1	Hermaphrodite	14	4.49026	4.20137	14.8167
CC1	Hermaphrodite	15	4.25052	4.64878	15.5192
CC1	Hermaphrodite	15	3.71694	4.12715	12.0483
CC1	Hermaphrodite	15	2.83612	3.80123	8.4672
CC1	Hermaphrodite	15	3.64203	3.13815	8.9765
CC1	Hermaphrodite	15	3.76079	3.19326	9.432
CC1	Hermaphrodite	15	3.78656	3.70363	11.0144
CC1	Hermaphrodite	15	3.9275	3.59733	11.0965
CC1	Hermaphrodite	15	4.30017	3.91437	13.2202
CC1	Hermaphrodite	15	4.79535	3.72633	14.0343
CC1	Hermaphrodite	15	4.33447	4.5865	15.6137
CC1	Hermaphrodite	15	3.38062	3.09156	8.20851
CC1	Hermaphrodite	15	5.11273	4.18585	16.8084
CC1	Hermaphrodite	16	4.73154	3.75567	13.9566
CC1	Hermaphrodite	16	3.32294	3.52702	9.20495
CC1	Hermaphrodite	16	2.82571	2.51942	5.59139
CC1	Hermaphrodite	16	3.26561	3.38386	8.67894
CC1	Hermaphrodite	16	3.28336	2.91206	7.50944
CC1	Hermaphrodite	16	3.10709	3.15504	7.69926
CC1	Hermaphrodite	16	2.51294	3.1303	6.17814
CC1	Hermaphrodite	16	4.61943	5.29787	19.2212
CC1	Hermaphrodite	16	3.70807	3.29547	9.59743
CC1	Hermaphrodite	16	3.47379	3.70107	10.0977
CC1	Hermaphrodite	16	4.27952	3.83451	12.8883
CC1	Hermaphrodite	16	4.15172	3.5074	11.4368
CC1	Hermaphrodite	16	4.43651	3.70124	12.8967
CC1	Hermaphrodite	16	4.03262	3.91539	12.4009
CC1	Hermaphrodite	16	3.45502	3.43181	9.31243
CC1	Hermaphrodite	16	3.66694	3.56149	10.2571
CC1	Hermaphrodite	16	3.71029	3.31117	9.64892
CC1	Hermaphrodite	17	3.64067	3.93126	11.2409
CC1	Hermaphrodite	17	3.53385	3.34035	9.27107
CC1	Hermaphrodite	17	3.1303	3.48624	8.57103
CC1	Hermaphrodite	17	3.70807	3.91437	11.3998
CC1	Hermaphrodite	17	3.85533	3.78673	11.4661
CC1	Hermaphrodite	17	4.12715	3.81267	12.3586
CC1	Hermaphrodite	17	3.43505	3.39666	9.16379
CC1	Hermaphrodite	17	4.09694	4.2872	13.7951
CC1	Hermaphrodite	17	3.71984	3.80499	11.1165
CC1	Hermaphrodite	17	4.04251	4.18397	13.284
CC1	Hermaphrodite	17	3.59255	3.88553	10.9633
CC1	Hermaphrodite	17	3.34479	3.50211	9.20001
CC1	Hermaphrodite	17	3.62173	3.01529	8.57698
CC1	Hermaphrodite	17	4.16042	4.07033	13.3001
CC1	Hermaphrodite	17	4.10411	4.1094	13.2461
CC1	Hermaphrodite	17	3.55177	3.28336	9.15909
CC1	Hermaphrodite	17	4.07033	3.73946	11.9544
CC1	Hermaphrodite	17	3.37516	2.75149	7.29376
CC1	Hermaphrodite	17	4.04251	3.97716	12.6274
CC1	Hermaphrodite	17	3.68452	3.49904	10.1256
CC1	Hermaphrodite	17	4.35204	4.51773	15.442
CC1	Hermaphrodite	17	4.47661	4.59452	16.1539
CC1	Hermaphrodite	17	3.94406	3.19804	9.90642
CC1	Hermaphrodite	17	4.93152	5.09055	19.7168
CC1	Hermaphrodite	17	4.10155	4.23584	13.6451
CC1	Hermaphrodite	17	3.64476	3.50211	10.0251
CC1	Hermaphrodite	17	3.17517	2.93577	7.32116
CC1	Hermaphrodite	18	4.77556	4.479	16.7994
CC1	Hermaphrodite	18	4.18397	3.75789	12.3487
CC1	Hermaphrodite	18	2.77504	3.48129	7.58751
CC1	Hermaphrodite	18	3.44341	3.73946	10.1132
CC1	Hermaphrodite	18	3.94491	3.97989	12.331
CC1	Hermaphrodite	18	3.59255	3.42225	9.65616
CC1	Hermaphrodite	18	3.70414	3.78963	11.0249
CC1	Hermaphrodite	18	3.26663	2.88697	7.40684
CC1	Hermaphrodite	18	3.26783	2.93629	7.53612
CC1	Hermaphrodite	18	3.43181	3.05488	8.23392
CC1	Hermaphrodite	18	3.51354	3.76267	10.3832
CC1	Hermaphrodite	18	4.61738	5.16512	18.7312
CC1	Hermaphrodite	18	4.22304	4.35785	14.454
CC1	Hermaphrodite	19	3.25776	4.18397	10.7053
CC1	Hermaphrodite	19	2.96171	3.29667	7.66845
CC1	Hermaphrodite	19	3.7666	4.22134	12.4879
CC1	Hermaphrodite	19	4.17015	3.21954	10.5447
CC1	Hermaphrodite	19	4.45374	3.75499	13.1348
CC1	Hermaphrodite	19	3.27005	3.17517	8.15477
CC1	Hermaphrodite	19	3.86283	3.56405	10.8128
CC1	Hermaphrodite	19	4.10326	3.25213	10.4806
CC1	Hermaphrodite	19	4.69485	4.27611	15.7674
CC1	Hermaphrodite	19	3.83451	4.14199	12.4741
CC1	Hermaphrodite	19	4.09694	3.95225	12.7173
CC1	Hermaphrodite	19	3.61575	3.999	11.3564
CC1	Hermaphrodite	19	3.73946	4.22475	12.408
CC1	Hermaphrodite	19	3.64783	3.60057	10.3156
LSJ2	Hermaphrodite	1	3.74817	3.14634	9.2622
LSJ2	Hermaphrodite	1	4.17356	4.04695	13.2655
LSJ2	Hermaphrodite	1	5.42022	5.22945	22.2619
LSJ2	Hermaphrodite	1	4.69946	4.76942	17.6037
LSJ2	Hermaphrodite	1	3.85447	3.86949	11.7141
LSJ2	Hermaphrodite	1	4.28379	4.10411	13.8082
LSJ2	Hermaphrodite	1	4.18619	3.90191	12.8288
LSJ2	Hermaphrodite	1	4.6295	4.5249	16.4525
LSJ2	Hermaphrodite	1	4.30751	3.89116	13.1642
LSJ2	Hermaphrodite	1	4.03517	4.34454	13.7688
LSJ2	Hermaphrodite	1	4.82777	4.88033	18.5049
LSJ2	Hermaphrodite	1	5.10557	5.37227	21.5423
LSJ2	Hermaphrodite	1	4.7056	3.24872	12.0065
LSJ2	Hermaphrodite	1	4.608	4.69553	16.9937
LSJ2	Hermaphrodite	1	3.78144	4.21059	12.5052
LSJ2	Hermaphrodite	2	4.58564	4.07306	14.6693
LSJ2	Hermaphrodite	2	3.31305	3.7666	9.80091
LSJ2	Hermaphrodite	2	2.91206	2.93202	6.70589
LSJ2	Hermaphrodite	2	4.21861	4.04831	13.4132
LSJ2	Hermaphrodite	2	4.2814	4.45323	14.9745
LSJ2	Hermaphrodite	2	4.63786	4.65492	16.9558
LSJ2	Hermaphrodite	2	4.84296	4.73461	18.0088
LSJ2	Hermaphrodite	2	4.60748	3.98194	14.4095
LSJ2	Hermaphrodite	2	3.9688	3.21613	10.0249
LSJ2	Hermaphrodite	2	3.39768	3.97716	10.6132
LSJ2	Hermaphrodite	2	3.74237	4.61943	13.5776
LSJ2	Hermaphrodite	2	4.77402	5.11342	19.1728
LSJ2	Hermaphrodite	2	5.41083	4.71686	20.045
LSJ2	Hermaphrodite	2	4.52916	3.58146	12.7399
LSJ2	Hermaphrodite	2	4.7474	3.80123	14.1733
LSJ2	Hermaphrodite	3	4.58564	4.58001	16.4952
LSJ2	Hermaphrodite	3	4.02187	3.35912	10.6107
LSJ2	Hermaphrodite	3	4.03483	3.80192	12.0481
LSJ2	Hermaphrodite	3	3.00539	3.25947	7.69375
LSJ2	Hermaphrodite	3	2.90028	2.93577	6.68733
LSJ2	Hermaphrodite	3	3.4429	3.42976	9.27424
LSJ2	Hermaphrodite	3	3.37652	3.54289	9.39545
LSJ2	Hermaphrodite	3	4.17185	2.91581	9.55384
LSJ2	Hermaphrodite	3	2.3034	3.16272	5.72163
LSJ2	Hermaphrodite	3	3.06307	3.24872	7.81553
LSJ2	Hermaphrodite	3	2.86667	2.95796	6.65976
LSJ2	Hermaphrodite	3	2.74739	2.44008	5.2652
LSJ2	Hermaphrodite	3	3.08201	3.6277	8.78122
LSJ2	Hermaphrodite	3	4.88408	4.77317	18.3096
LSJ2	Hermaphrodite	3	3.33728	3.48129	9.12479
LSJ2	Hermaphrodite	4	3.82035	3.28216	9.8481
LSJ2	Hermaphrodite	4	3.61575	3.13252	8.89574
LSJ2	Hermaphrodite	4	3.09924	3.18729	7.75831
LSJ2	Hermaphrodite	4	3.8828	3.2378	9.8738
LSJ2	Hermaphrodite	4	3.43881	3.29906	8.91019
LSJ2	Hermaphrodite	4	4.58257	3.78963	13.6394
LSJ2	Hermaphrodite	4	3.31868	3.25776	8.4913
LSJ2	Hermaphrodite	4	3.38386	3.34479	8.88936
LSJ2	Hermaphrodite	4	4.36894	3.79953	13.0375
LSJ2	Hermaphrodite	4	3.01461	3.24258	7.67734
LSJ2	Hermaphrodite	4	3.29325	2.82776	7.31405
LSJ2	Hermaphrodite	4	4.21724	3.31868	10.9922
LSJ2	Hermaphrodite	4	3.15794	2.85148	7.07236
LSJ2	Hermaphrodite	4	4.40443	3.63777	12.5839
LSJ2	Hermaphrodite	4	4.30665	4.14643	14.025
LSJ2	Hermaphrodite	5	3.83792	4.11452	12.4024
LSJ2	Hermaphrodite	5	3.25008	3.45502	8.81931
LSJ2	Hermaphrodite	5	3.62326	3.68657	10.4909
LSJ2	Hermaphrodite	5	3.58129	3.07621	8.65255
LSJ2	Hermaphrodite	5	4.11827	4.46995	14.458
LSJ2	Hermaphrodite	5	3.92187	2.98611	9.19791
LSJ2	Hermaphrodite	5	3.65108	3.28916	9.43182
LSJ2	Hermaphrodite	5	3.65995	3.97733	11.4329
LSJ2	Hermaphrodite	5	3.75056	3.30708	9.74158
LSJ2	Hermaphrodite	5	4.1094	4.02442	12.9889
LSJ2	Hermaphrodite	5	4.13858	3.7666	12.2431
LSJ2	Hermaphrodite	5	3.24872	4.10411	10.4718
LSJ2	Hermaphrodite	5	3.68657	3.11801	9.02796
LSJ2	Hermaphrodite	5	4.32611	3.95088	13.424
LSJ2	Hermaphrodite	5	3.86863	3.17398	9.64388
LSJ2	Hermaphrodite	6	3.56303	3.31868	9.28698
LSJ2	Hermaphrodite	6	3.78144	3.82137	11.3492
LSJ2	Hermaphrodite	6	3.95088	3.59238	11.1472
LSJ2	Hermaphrodite	6	3.31663	3.28762	8.56385
LSJ2	Hermaphrodite	6	2.95608	3.07877	7.14797
LSJ2	Hermaphrodite	6	3.43778	3.37942	9.12454
LSJ2	Hermaphrodite	6	2.90523	2.28924	5.2235
LSJ2	Hermaphrodite	6	3.10965	3.29803	8.05483
LSJ2	Hermaphrodite	6	2.70934	2.51431	5.35022
LSJ2	Hermaphrodite	6	2.98048	2.73954	6.4129
LSJ2	Hermaphrodite	6	2.64416	2.78544	5.78458
LSJ2	Hermaphrodite	6	2.44315	2.76616	5.30784
LSJ2	Hermaphrodite	6	3.78144	3.98671	11.8403
LSJ2	Hermaphrodite	6	3.74237	3.34035	9.81811
LSJ2	Hermaphrodite	6	3.32243	3.06614	8.00088
LSJ2	Hermaphrodite	7	4.37781	3.54153	12.1769
LSJ2	Hermaphrodite	7	4.51108	4.3529	15.4223
LSJ2	Hermaphrodite	7	4.19813	4.07237	13.4274
LSJ2	Hermaphrodite	7	4.74655	3.86181	14.3966
LSJ2	Hermaphrodite	7	4.82692	4.91258	18.6239
LSJ2	Hermaphrodite	7	4.25052	3.78878	12.6483
LSJ2	Hermaphrodite	8	4.86378	4.86617	18.5888
LSJ2	Hermaphrodite	8	3.15675	3.09037	7.66196
LSJ2	Hermaphrodite	8	5.13321	5.21563	21.0274
LSJ2	Hermaphrodite	8	4.24625	4.48377	14.9534
LSJ2	Hermaphrodite	8	3.68862	3.30247	9.56735
LSJ2	Hermaphrodite	8	4.31672	5.00762	16.9776
LSJ2	Hermaphrodite	8	3.69237	3.0774	8.9244
LSJ2	Hermaphrodite	8	4.32013	4.02869	13.6695
LSJ2	Hermaphrodite	8	4.59588	4.50493	16.261
LSJ2	Hermaphrodite	8	2.75661	3.6637	7.93204
LSJ2	Hermaphrodite	8	3.23763	2.55628	6.50018
LSJ2	Hermaphrodite	8	3.61968	3.33182	9.47199
LSJ2	Hermaphrodite	8	3.33182	3.05488	7.99401
LSJ2	Hermaphrodite	8	2.70217	3.79083	8.0452
LSJ2	Hermaphrodite	8	3.31868	3.50109	9.12553
LSJ2	Hermaphrodite	9	4.44231	3.86266	13.4768
LSJ2	Hermaphrodite	9	5.80227	5.63675	25.6872
LSJ2	Hermaphrodite	9	5.97222	4.38532	20.5696
LSJ2	Hermaphrodite	9	4.46671	4.27611	15.0012
LSJ2	Hermaphrodite	9	4.19506	3.9734	13.0915
LSJ2	Hermaphrodite	9	5.31442	5.75432	24.0182
LSJ2	Hermaphrodite	9	5.2919	6.06761	25.2185
LSJ2	Hermaphrodite	9	4.99312	5.30692	20.8115
LSJ2	Hermaphrodite	9	4.53462	4.92487	17.5398
LSJ2	Hermaphrodite	9	4.3546	3.92836	13.4354
LSJ2	Hermaphrodite	9	4.55305	5.49479	19.6491
LSJ2	Hermaphrodite	10	2.87332	2.47352	5.582
LSJ2	Hermaphrodite	10	3.77905	3.96573	11.7705
LSJ2	Hermaphrodite	10	3.58521	3.13815	8.83645
LSJ2	Hermaphrodite	10	3.07621	3.26646	7.89193
LSJ2	Hermaphrodite	10	3.60671	3.39461	9.61593
LSJ2	Hermaphrodite	10	3.9014	2.97621	9.11957
LSJ2	Hermaphrodite	10	3.11665	3.43881	8.41754
LSJ2	Hermaphrodite	10	2.60457	2.38957	4.88817
LSJ2	Hermaphrodite	10	3.10965	2.78937	6.81252
LSJ2	Hermaphrodite	10	3.64203	3.36731	9.632
LSJ2	Hermaphrodite	10	4.03961	3.04873	9.67273
LSJ2	Hermaphrodite	10	3.29906	2.6259	6.8039
LSJ2	Hermaphrodite	11	3.18541	3.10095	7.75801
LSJ2	Hermaphrodite	11	3.86283	3.88553	11.7882
LSJ2	Hermaphrodite	11	3.29223	3.29325	8.5154
LSJ2	Hermaphrodite	11	4.26417	3.86283	12.9369
LSJ2	Hermaphrodite	11	3.17517	3.24326	8.08796
LSJ2	Hermaphrodite	11	3.92546	3.70414	11.42
LSJ2	Hermaphrodite	11	3.29325	3.13934	8.11996
LSJ2	Hermaphrodite	11	3.13252	2.72214	6.6972
LSJ2	Hermaphrodite	11	4.01077	3.58845	11.3038
LSJ2	Hermaphrodite	11	3.50109	3.19804	8.7938
LSJ2	Hermaphrodite	11	4.09967	3.54869	11.4264
LSJ2	Hermaphrodite	11	3.56405	3.06307	8.57414
LSJ2	Hermaphrodite	11	3.41458	3.51354	9.42263
LSJ2	Hermaphrodite	11	3.36356	3.28319	8.67329
LSJ2	Hermaphrodite	11	3.83161	3.14685	9.46993
LSJ2	Hermaphrodite	12	3.74578	2.66532	7.84117
LSJ2	Hermaphrodite	12	3.74237	3.55381	10.4455
LSJ2	Hermaphrodite	12	2.29572	2.85592	5.14938
LSJ2	Hermaphrodite	12	3.48812	4.27611	11.7147
LSJ2	Hermaphrodite	12	2.8897	3.38215	7.67603
LSJ2	Hermaphrodite	12	3.07621	3.14685	7.60294
LSJ2	Hermaphrodite	12	3.25793	3.58146	9.16414
LSJ2	Hermaphrodite	12	3.72496	3.00812	8.8005
LSJ2	Hermaphrodite	12	3.4429	3.52685	9.53678
LSJ2	Hermaphrodite	12	4.3041	3.94491	13.3355
LSJ2	Hermaphrodite	12	3.51781	3.3999	9.39352
LSJ2	Hermaphrodite	12	3.4673	3.14071	8.55281
LSJ2	Hermaphrodite	12	3.48129	2.83612	7.75453
LSJ2	Hermaphrodite	12	2.99584	3.26561	7.68374
LSJ2	Hermaphrodite	12	3.51781	4.25069	11.7441
LSJ2	Hermaphrodite	13	4.25069	4.82163	16.0969
LSJ2	Hermaphrodite	13	3.42447	3.58146	9.63259
LSJ2	Hermaphrodite	13	3.22022	3.1477	7.96103
LSJ2	Hermaphrodite	13	4.16179	4.12715	13.4902
LSJ2	Hermaphrodite	13	4.32423	3.73878	12.6978
LSJ2	Hermaphrodite	13	3.84628	3.40229	10.2778
LSJ2	Hermaphrodite	13	3.30196	3.05778	7.92989
LSJ2	Hermaphrodite	13	3.35485	2.75831	7.26787
LSJ2	Hermaphrodite	13	3.51781	4.04695	11.1812
LSJ2	Hermaphrodite	13	4.30205	4.14848	14.017
LSJ2	Hermaphrodite	13	3.74817	3.19804	9.4144
LSJ2	Hermaphrodite	13	3.60057	3.38062	9.55998
LSJ2	Hermaphrodite	14	3.93296	4.61431	14.2533
LSJ2	Hermaphrodite	14	3.4429	2.84124	7.68285
LSJ2	Hermaphrodite	14	3.65295	3.63231	10.4212
LSJ2	Hermaphrodite	14	4.09558	3.59954	11.5785
LSJ2	Hermaphrodite	14	4.10667	4.16605	13.4371
LSJ2	Hermaphrodite	14	2.68477	3.2535	6.86037
LSJ2	Hermaphrodite	14	3.47379	3.13815	8.56182
LSJ2	Hermaphrodite	14	3.6707	3.62326	10.4457
LSJ2	Hermaphrodite	14	3.53794	2.87844	7.99831
LSJ2	Hermaphrodite	14	3.62992	3.19787	9.1169
LSJ2	Hermaphrodite	14	4.41177	3.89116	13.4828
LSJ2	Hermaphrodite	14	4.04251	3.78878	12.0293
LSJ2	Hermaphrodite	14	4.87504	4.85337	18.5828
LSJ2	Hermaphrodite	14	4.29642	3.98347	13.4418
LSJ2	Hermaphrodite	14	4.55715	3.80499	13.6187
LSJ2	Hermaphrodite	15	2.97638	3.05249	7.13564
LSJ2	Hermaphrodite	15	3.74237	3.4127	10.0308
LSJ2	Hermaphrodite	15	3.52617	3.42174	9.47634
LSJ2	Hermaphrodite	15	4.07033	4.3546	13.9209
LSJ2	Hermaphrodite	15	3.66473	3.66473	10.5481
LSJ2	Hermaphrodite	15	3.59733	3.66319	10.3497
LSJ2	Hermaphrodite	15	3.42976	3.36885	9.07476
LSJ2	Hermaphrodite	15	4.7846	4.42627	16.6331
LSJ2	Hermaphrodite	15	3.48948	3.82393	10.48
LSJ2	Hermaphrodite	15	3.6277	3.22159	9.17891
LSJ2	Hermaphrodite	15	3.70414	3.48556	10.1403
LSJ2	Hermaphrodite	15	3.45502	3.48129	9.44671
LSJ2	Hermaphrodite	15	3.51781	3.44341	9.51374
LSJ2	Hermaphrodite	15	3.34564	3.77666	9.92378
LSJ2	Hermaphrodite	15	2.99242	2.62624	6.17231
N2	Hermaphrodite	1	3.224	3.43347	8.69397
N2	Hermaphrodite	1	4.16743	4.19873	13.7428
N2	Hermaphrodite	1	4.44082	4.52836	15.7941
N2	Hermaphrodite	1	3.86363	3.89729	11.8263
N2	Hermaphrodite	1	4.10425	4.1016	13.2214
N2	Hermaphrodite	1	4.1016	4.01568	12.9361
N2	Hermaphrodite	1	3.9001	3.89729	11.9379
N2	Hermaphrodite	1	3.44307	3.39849	9.19011
N2	Hermaphrodite	1	3.47451	3.57046	9.74334
N2	Hermaphrodite	1	3.44307	3.3663	9.10309
N2	Hermaphrodite	1	3.60382	3.89729	11.031
N2	Hermaphrodite	1	4.52836	4.38901	15.6098
N2	Hermaphrodite	1	3.69933	4.01568	11.6674
N2	Hermaphrodite	1	4.46282	4.42857	15.5225
N2	Hermaphrodite	1	4.75363	4.42857	16.534
N2	Hermaphrodite	1	4.13333	4.13599	13.4267
N2	Hermaphrodite	1	4.25025	4.06159	13.5581
N2	Hermaphrodite	1	4.25792	4.01568	13.4291
N2	Hermaphrodite	1	4.3617	4.48969	15.3802
N2	Hermaphrodite	1	3.97479	3.77226	11.7762
N2	Hermaphrodite	1	3.96106	3.96106	12.3229
N2	Hermaphrodite	1	4.11222	4.15695	13.4258
N2	Hermaphrodite	1	4.25025	4.20124	14.0243
N2	Hermaphrodite	1	3.87485	4.01568	12.2209
N2	Hermaphrodite	1	3.69933	3.6459	10.593
N2	Hermaphrodite	2	4.22973	4.083	13.5638
N2	Hermaphrodite	2	3.83249	3.73447	11.2408
N2	Hermaphrodite	2	4.35919	4.22973	14.4813
N2	Hermaphrodite	2	4.44082	4.52836	15.7941
N2	Hermaphrodite	2	4.29867	4.11754	13.9015
N2	Hermaphrodite	2	4.02926	4.22973	13.3853
N2	Hermaphrodite	2	4.15961	4.1016	13.3997
N2	Hermaphrodite	2	3.76355	3.7169	10.9867
N2	Hermaphrodite	2	4.66816	4.4823	16.4338
N2	Hermaphrodite	3	5.14984	5.11795	20.7004
N2	Hermaphrodite	3	4.48969	4.15695	14.6582
N2	Hermaphrodite	3	4.52836	4.8084	17.1014
N2	Hermaphrodite	3	4.71687	4.4237	16.3881
N2	Hermaphrodite	3	5.01905	4.76057	18.7659
N2	Hermaphrodite	3	4.83556	4.66816	17.7289
N2	Hermaphrodite	3	4.34162	4.48969	15.3094
N2	Hermaphrodite	3	4.70993	4.38163	16.2084
N2	Hermaphrodite	3	4.49943	4.38399	15.4923
N2	Hermaphrodite	3	4.22973	3.97479	13.2043
N2	Hermaphrodite	3	4.81976	4.63302	17.538
N2	Hermaphrodite	4	3.6459	3.69933	10.593
N2	Hermaphrodite	4	4.3617	4.20124	14.3921
N2	Hermaphrodite	4	3.57046	3.55511	9.96936
N2	Hermaphrodite	4	4.46769	4.29114	15.0572
N2	Hermaphrodite	4	4.29867	4.02926	13.6035
N2	Hermaphrodite	4	4.62121	4.76972	17.3117
N2	Hermaphrodite	4	4.38163	4.15961	14.3146
N2	Hermaphrodite	4	4.57855	4.58328	16.4814
N2	Hermaphrodite	4	4.15695	3.70229	12.0875
N2	Hermaphrodite	4	3.97479	4.01568	12.5361
N2	Hermaphrodite	4	5.2421	4.73296	19.4862
N2	Hermaphrodite	4	3.9001	3.82953	11.7303
N2	Hermaphrodite	4	4.083	3.98852	12.7903
N2	Hermaphrodite	4	4.15695	4.15695	13.5719
N2	Hermaphrodite	4	5.38765	5.75714	24.3611
N2	Hermaphrodite	5	4.44082	4.19873	14.6444
N2	Hermaphrodite	5	3.73447	3.69048	10.8243
N2	Hermaphrodite	5	3.70229	3.98852	11.5977
N2	Hermaphrodite	5	3.7169	3.55511	10.3782
N2	Hermaphrodite	5	2.98899	3.92239	9.20799
N2	Hermaphrodite	5	3.30091	3.54906	9.20103
N2	Hermaphrodite	5	4.19873	4.13599	13.6391
N2	Hermaphrodite	5	3.3694	3.6459	9.64822
N2	Hermaphrodite	5	4.06159	4.083	13.0246
N2	Hermaphrodite	5	3.93892	4.37159	13.524
N2	Hermaphrodite	5	3.57046	3.8381	10.7629
N2	Hermaphrodite	5	4.01022	4.43846	13.9795
N2	Hermaphrodite	5	3.88327	4.13599	12.6144
N2	Hermaphrodite	6	4.02926	3.93065	12.4388
N2	Hermaphrodite	6	3.90836	3.97479	12.2011
N2	Hermaphrodite	6	3.83249	3.96106	11.9229
N2	Hermaphrodite	6	3.98571	4.01022	12.5535
N2	Hermaphrodite	6	4.02926	3.69343	11.6881
N2	Hermaphrodite	6	4.32155	4.54755	15.435
N2	Hermaphrodite	6	4.26058	3.79529	12.7
N2	Hermaphrodite	6	3.99664	3.26105	10.2363
N2	Hermaphrodite	6	4.11222	3.87485	12.5147
N2	Hermaphrodite	6	4.37159	4.29867	14.7592
N2	Hermaphrodite	6	4.11222	4.19873	13.5608
N2	Hermaphrodite	6	4.083	3.86363	12.3898
N2	Hermaphrodite	6	4.05598	3.88327	12.3704
N2	Hermaphrodite	7	3.76355	3.86363	11.4204
N2	Hermaphrodite	7	4.34413	4.44082	15.1515
N2	Hermaphrodite	7	4.90715	4.66816	17.9914
N2	Hermaphrodite	7	4.58328	4.48969	16.1615
N2	Hermaphrodite	7	4.76972	4.16743	15.6117
N2	Hermaphrodite	7	3.9001	3.69933	11.3315
N2	Hermaphrodite	7	4.02926	4.16743	13.1882
N2	Hermaphrodite	7	4.58328	4.83556	17.4065
N2	Hermaphrodite	7	4.52836	4.72617	16.8089
N2	Hermaphrodite	7	4.54755	4.22722	15.0981
N2	Hermaphrodite	8	4.01022	4.45071	14.0181
N2	Hermaphrodite	8	4.48969	3.98571	14.0544
N2	Hermaphrodite	8	4.40392	4.43846	15.3519
N2	Hermaphrodite	8	4.72617	4.76514	17.6879
N2	Hermaphrodite	8	4.03192	4.20124	13.3039
N2	Hermaphrodite	8	4.34413	4.19873	14.3255
N2	Hermaphrodite	8	4.09362	3.82953	12.3124
N2	Hermaphrodite	8	3.97479	3.44617	10.7582
N2	Hermaphrodite	8	3.54906	3.78377	10.547
N2	Hermaphrodite	8	4.14381	4.30383	14.007
N2	Hermaphrodite	9	4.22722	3.76355	12.4952
N2	Hermaphrodite	9	4.09362	3.76355	12.1003
N2	Hermaphrodite	9	4.03192	3.6459	11.5453
N2	Hermaphrodite	9	3.34682	3.3663	8.84862
N2	Hermaphrodite	9	3.43347	3.56736	9.6199
N2	Hermaphrodite	9	3.6459	3.70229	10.6014
N2	Hermaphrodite	9	3.93892	4.01022	12.4061
N2	Hermaphrodite	9	3.73742	4.01022	11.7714
N2	Hermaphrodite	9	3.90836	3.54906	10.8943
N2	Hermaphrodite	9	3.88327	3.98571	12.1561
N2	Hermaphrodite	9	3.27773	3.8381	9.88051
N2	Hermaphrodite	9	3.83249	4.19873	12.6383
N2	Hermaphrodite	9	3.7169	4.13333	12.0662
N2	Hermaphrodite	9	4.26058	3.97479	13.3007
N2	Hermaphrodite	9	4.22722	4.01022	13.3141
N2	Hermaphrodite	9	4.22722	4.05347	13.4577
N2	Hermaphrodite	9	3.84946	3.8381	11.6039
LSJ1	Hermaphrodite	1	5.28137	5.34898	22.1874
LSJ1	Hermaphrodite	1	3.79529	3.86363	11.5168
LSJ1	Hermaphrodite	1	3.43347	3.57046	9.62826
LSJ1	Hermaphrodite	1	4.15695	4.01568	13.1106
LSJ1	Hermaphrodite	1	3.96106	3.76355	11.7084
LSJ1	Hermaphrodite	1	3.30091	3.17986	8.24388
LSJ1	Hermaphrodite	1	3.79529	3.55511	10.5971
LSJ1	Hermaphrodite	1	3.1558	3.55511	8.81155
LSJ1	Hermaphrodite	1	3.6459	3.6459	10.4399
LSJ1	Hermaphrodite	1	2.83945	2.83945	6.33226
LSJ1	Hermaphrodite	1	3.92239	3.73447	11.5045
LSJ1	Hermaphrodite	1	3.57046	3.55511	9.96936
LSJ1	Hermaphrodite	2	3.70229	3.54286	10.3018
LSJ1	Hermaphrodite	2	2.83945	2.5138	5.60604
LSJ1	Hermaphrodite	2	3.69048	3.45886	10.0255
LSJ1	Hermaphrodite	3	3.96106	4.05347	12.6104
LSJ1	Hermaphrodite	3	3.01084	2.90027	6.85829
LSJ1	Hermaphrodite	3	3.1	3.11402	7.58182
LSJ1	Hermaphrodite	3	3.69343	3.7169	10.782
LSJ1	Hermaphrodite	3	3.224	3.88327	9.83291
LSJ1	Hermaphrodite	3	3.76355	3.30091	9.7571
LSJ1	Hermaphrodite	3	3.69048	3.3663	9.75721
LSJ1	Hermaphrodite	3	3.78082	3.54906	10.5387
LSJ1	Hermaphrodite	3	3.1592	3.34018	8.28773
LSJ1	Hermaphrodite	3	3.75779	3.44617	10.1709
LSJ1	Hermaphrodite	3	4.38163	3.72576	12.8215
LSJ1	Hermaphrodite	3	3.9001	3.24083	9.92707
LSJ1	Hermaphrodite	3	3.16953	2.86617	7.13488
LSJ1	Hermaphrodite	3	3.27773	3.97479	10.2324
LSJ1	Hermaphrodite	3	3.59482	3.92239	11.0743
LSJ1	Hermaphrodite	3	3.83249	3.224	9.70433
LSJ1	Hermaphrodite	3	3.3663	2.86617	7.57784
LSJ1	Hermaphrodite	3	3.224	3.11402	7.88509
LSJ1	Hermaphrodite	3	3.44617	3.47451	9.40415
LSJ1	Hermaphrodite	3	3.54906	3.33043	9.28333
LSJ1	Hermaphrodite	3	3.47451	2.98545	8.14691
LSJ1	Hermaphrodite	3	3.224	3.33043	8.43307
LSJ1	Hermaphrodite	3	3.3173	3.18665	8.3025
LSJ1	Hermaphrodite	3	2.98545	2.95607	6.93129
LSJ1	Hermaphrodite	3	3.24083	3.39849	8.6503
LSJ1	Hermaphrodite	3	3.98852	3.8381	12.0231
LSJ1	Hermaphrodite	3	3.82953	3.6459	10.9658
LSJ1	Hermaphrodite	3	3.12805	3.08243	7.57281
LSJ1	Hermaphrodite	3	3.59172	3.61888	10.2086
LSJ1	Hermaphrodite	3	3.86363	4.14381	12.5744
LSJ1	Hermaphrodite	3	3.83249	3.73742	11.2497
LSJ1	Hermaphrodite	3	3.18665	3.30091	8.26149
LSJ1	Hermaphrodite	3	3.70229	3.5089	10.2031
LSJ1	Hermaphrodite	3	3.08243	3.01084	7.28905
LSJ1	Hermaphrodite	3	3.40808	3.5089	9.39229
LSJ1	Hermaphrodite	4	4.30383	4.48969	15.1761
LSJ1	Hermaphrodite	4	3.10354	3.23758	7.89166
LSJ1	Hermaphrodite	4	3.224	3.18665	8.069
LSJ1	Hermaphrodite	4	3.40808	3.56736	9.54876
LSJ1	Hermaphrodite	4	3.70229	3.89729	11.3324
LSJ1	Hermaphrodite	4	3.92239	3.70229	11.4054
LSJ1	Hermaphrodite	4	3.40808	3.3663	9.01059
LSJ1	Hermaphrodite	4	4.16743	4.06159	13.294
LSJ1	Hermaphrodite	4	3.65195	3.65195	10.4746
LSJ1	Hermaphrodite	4	3.9001	3.76355	11.5282
LSJ1	Hermaphrodite	4	3.9001	3.19344	9.78192
LSJ1	Hermaphrodite	4	3.57046	3.70229	10.3821
LSJ1	Hermaphrodite	4	3.87485	3.5089	10.6787
LSJ1	Hermaphrodite	5	3.76355	4.01568	11.8699
LSJ1	Hermaphrodite	5	4.40392	3.86363	13.3637
LSJ1	Hermaphrodite	5	3.73447	3.27773	9.61373
LSJ1	Hermaphrodite	5	3.78377	3.2677	9.71083
LSJ1	Hermaphrodite	5	3.59482	3.224	9.10253
LSJ1	Hermaphrodite	5	3.6459	3.65195	10.4573
LSJ1	Hermaphrodite	5	3.59482	3.65195	10.3108
LSJ1	Hermaphrodite	5	4.94908	4.83556	18.7958
LSJ1	Hermaphrodite	5	3.8381	3.97479	11.9817
LSJ1	Hermaphrodite	5	4.57855	4.02926	14.4892
LSJ1	Hermaphrodite	5	4.68912	4.69133	17.2774
LSJ1	Hermaphrodite	6	3.2677	3.27773	8.41211
LSJ1	Hermaphrodite	6	3.5089	3.26105	8.98709
LSJ1	Hermaphrodite	6	3.92239	3.83249	11.8065
LSJ1	Hermaphrodite	6	3.76355	3.84946	11.3786
LSJ1	Hermaphrodite	6	4.34162	4.15695	14.1748
LSJ1	Hermaphrodite	6	3.30091	3.26105	8.45437
LSJ1	Hermaphrodite	6	3.86363	3.59172	10.899
LSJ1	Hermaphrodite	6	3.23758	3.23758	8.23249
LSJ1	Hermaphrodite	6	3.30091	3.16953	8.21709
LSJ1	Hermaphrodite	7	3.89729	3.69933	11.3234
LSJ1	Hermaphrodite	7	3.12805	2.98545	7.33454
LSJ1	Hermaphrodite	7	3.19344	3.24083	8.1284
LSJ1	Hermaphrodite	7	3.98852	3.98852	12.4943
LSJ1	Hermaphrodite	7	3.6459	3.6459	10.4399
LSJ1	Hermaphrodite	7	3.93065	3.97479	12.2707
LSJ1	Hermaphrodite	7	3.4996	3.6459	10.021
LSJ1	Hermaphrodite	7	3.60382	3.3663	9.52811
LSJ1	Hermaphrodite	7	3.3173	3.3173	8.64287
LSJ1	Hermaphrodite	8	3.89729	3.75779	11.5023
LSJ1	Hermaphrodite	8	3.89729	3.60382	11.031
LSJ1	Hermaphrodite	8	4.30383	4.22722	14.2889
LSJ1	Hermaphrodite	8	3.3173	3.17986	8.2848
LSJ1	Hermaphrodite	8	3.11402	3.3173	8.11327
LSJ1	Hermaphrodite	8	3.24083	3.57046	9.08804
LSJ1	Hermaphrodite	8	3.3173	3.04331	7.92904
LSJ1	Hermaphrodite	8	3.70229	3.97479	11.5578
LSJ1	Hermaphrodite	8	3.6459	3.4996	10.021
LSJ1	Hermaphrodite	8	3.39849	3.27773	8.74881
LSJ1	Hermaphrodite	8	3.78377	3.92239	11.6564
LSJ1	Hermaphrodite	9	2.98899	3.40808	8.00063
LSJ1	Hermaphrodite	9	3.87485	3.86363	11.7582
LSJ1	Hermaphrodite	9	3.78377	3.76355	11.1844
LSJ1	Hermaphrodite	9	3.5089	3.59172	9.89837
LSJ1	Hermaphrodite	9	4.76972	4.63302	17.3559
LSJ1	Hermaphrodite	9	3.40808	3.61888	9.68666
LSJ1	Hermaphrodite	9	3.3173	3.61888	9.42862
LSJ1	Hermaphrodite	9	3.08243	3.47451	8.41157
LSJ1	Hermaphrodite	9	3.76355	3.56736	10.5447
LSJ1	Hermaphrodite	9	3.03962	3.16953	7.56666
LSJ1	Hermaphrodite	9	3.65195	3.59172	10.3019
LSJ1	Hermaphrodite	10	3.83249	3.54906	10.6828
LSJ1	Hermaphrodite	10	4.13599	3.98852	12.9563
LSJ1	Hermaphrodite	10	3.27773	3.69343	9.50809
LSJ1	Hermaphrodite	10	3.04331	2.98899	7.14433
LSJ1	Hermaphrodite	10	3.92239	3.6459	11.2317
LSJ1	Hermaphrodite	10	3.96106	3.8381	11.9404
LSJ1	Hermaphrodite	10	4.11222	4.01568	12.9696
LSJ1	Hermaphrodite	10	3.3694	3.57046	9.4486
LSJ1	Hermaphrodite	10	3.96106	3.39849	10.5727
LSJ1	Hermaphrodite	10	3.5089	2.94131	8.10592
LSJ1	Hermaphrodite	10	4.15961	3.97479	12.9854
LSJ1	Hermaphrodite	10	4.09362	3.8096	12.2484
LSJ1	Hermaphrodite	10	3.92239	3.83249	11.8065
LSJ1	Hermaphrodite	10	4.11222	4.11754	13.2985
LSJ1	Hermaphrodite	10	3.3173	3.65195	9.51478
LSJ1	Hermaphrodite	10	3.78377	3.65195	10.8527
LSJ1	Hermaphrodite	11	3.77226	3.60382	10.6771
LSJ1	Hermaphrodite	11	3.76355	3.33043	9.84437
LSJ1	Hermaphrodite	11	3.04331	3.11402	7.44318
LSJ1	Hermaphrodite	11	3.78377	4.11754	12.2364
LSJ1	Hermaphrodite	11	2.8086	2.95607	6.52071
LSJ1	Hermaphrodite	11	3.97479	3.76355	11.749
LSJ1	Hermaphrodite	11	3.55511	3.89729	10.8819
LSJ1	Hermaphrodite	11	4.15961	3.73447	12.2003
LSJ1	Hermaphrodite	11	3.69048	3.48396	10.0982
LSJ1	Hermaphrodite	11	4.17526	4.15695	13.6316
LSJ1	Hermaphrodite	11	4.26058	4.083	13.6627
LSJ1	Hermaphrodite	11	4.28346	4.15695	13.9849
LSJ1	Hermaphrodite	11	3.97479	3.76355	11.749

## Sheet: 10 CX12311 CX13248 N2 nurf-1
Strain	Sex	Individual	Sperm diameter 1 (microns)	Sperm diameter 2 (microns)	Sperm cross-sectional area
CX12311	Male	20	5.23852	4.40357	18.1177
CX12311	Male	20	5.85964	5.47164	25.1813
CX12311	Male	20	5.68307	5.45632	24.3541
CX12311	Male	20	6.38286	5.61347	28.1408
CX12311	Male	20	5.27728	4.62449	19.1674
CX12311	Male	20	6.2235	6.14345	30.0287
CX12311	Male	20	5.29037	4.79678	19.9309
CX12311	Male	20	7.08449	6.51828	36.2686
CX12311	Male	20	5.32602	5.26555	22.026
CX12311	Male	20	5.45632	5.62449	24.1031
CX12311	Male	20	5.75245	5.43493	24.5548
CX12311	Male	20	4.39199	4.65743	16.0656
CX12311	Male	20	4.71953	4.66445	17.2898
CX12311	Male	20	5.35533	4.93147	20.7421
CX12311	Male	20	4.65508	4.83005	17.6591
CX12311	Male	19	6.18301	6.44923	31.3183
CX12311	Male	19	6.34856	5.79657	28.9025
CX12311	Male	19	5.43091	5.25725	22.4244
CX12311	Male	19	5.39662	5.85467	24.815
CX12311	Male	19	6.1078	4.76939	22.879
CX12311	Male	19	6.47514	5.9533	30.2759
CX12311	Male	19	6.14345	5.90912	28.5118
CX12311	Male	19	6.15824	6.3158	30.5474
CX12311	Male	19	6.05934	4.96383	23.6229
CX12311	Male	19	5.877	5.25655	24.2631
CX12311	Male	19	6.22876	6.80938	33.3119
CX12311	Male	19	5.33081	5.13679	21.5067
CX12311	Male	19	6.53333	6.60921	33.9136
CX12311	Male	19	6.63724	6.18301	32.2313
CX12311	Male	19	5.52986	6.03286	26.2016
CX12311	Male	18	5.05105	4.88699	19.3871
CX12311	Male	18	4.96017	4.4143	17.1968
CX12311	Male	18	5.7928	5.49288	24.9907
CX12311	Male	18	4.70563	3.93294	14.5353
CX12311	Male	18	5.34512	4.70563	19.7545
CX12311	Male	18	5.15871	5.29037	21.4347
CX12311	Male	18	5.41883	5.15871	21.9552
CX12311	Male	18	5.72645	5.71195	25.6897
CX12311	Male	18	5.09053	4.79678	19.178
CX12311	Male	18	5.15871	5.25725	21.3005
CX12311	Male	18	5.70288	5.71691	25.6062
CX12311	Male	18	5.67217	5.85964	26.1042
CX12311	Male	18	4.67692	4.66445	17.1337
CX12311	Male	18	5.38582	5.63354	23.8299
CX12311	Male	18	5.31439	5.83661	24.3615
CX12311	Male	17	5.67986	5.18264	23.1195
CX12311	Male	17	5.18966	5.12828	20.9026
CX12311	Male	17	5.49818	5.49818	23.7426
CX12311	Male	17	5.79154	5.73407	26.0824
CX12311	Male	17	4.78463	4.69246	17.6335
CX12311	Male	17	4.98359	5.01852	19.643
CX12311	Male	17	5.7928	5.36958	24.4297
CX12311	Male	17	5.97527	6.09348	28.5965
CX12311	Male	17	4.10412	4.22472	13.6178
CX12311	Male	17	5.37229	5.49288	23.1766
CX12311	Male	17	5.72645	6.19536	27.8639
CX12311	Male	17	4.96017	4.74414	18.4818
CX12311	Male	17	5.57117	5.49818	24.0578
CX12311	Male	17	4.9697	4.66211	18.1971
CX12311	Male	17	5.67281	5.40269	24.0712
CX12311	Male	16	4.76099	4.71104	17.6159
CX12311	Male	16	5.50083	5.15447	22.2691
CX12311	Male	16	5.84471	5.44497	24.9947
CX12311	Male	16	4.81193	4.83005	18.2541
CX12311	Male	16	5.37568	5.11976	21.6159
CX12311	Male	16	4.91668	5.17069	19.9669
CX12311	Male	16	4.81193	4.59924	17.3818
CX12311	Male	16	5.4723	5.50281	23.6507
CX12311	Male	16	5.19386	4.91076	20.0322
CX12311	Male	16	3.72672	3.62975	10.6241
CX12311	Male	16	4.80361	5.722	21.5876
CX12311	Male	16	4.04696	4.23677	13.4665
CX12311	Male	16	5.38785	5.27659	22.3285
CX12311	Male	16	5.61412	5.34308	23.5594
CX12311	Male	16	5.20926	5.46098	22.3428
CX12311	Male	15	5.29037	4.89591	20.3428
CX12311	Male	15	5.30411	5.26555	21.9354
CX12311	Male	15	5.39595	5.28211	22.3854
CX12311	Male	15	5.46098	5.60828	24.0542
CX12311	Male	15	5.68627	5.89679	26.335
CX12311	Male	15	4.99963	5.17069	20.3038
CX12311	Male	15	5.47762	5.92143	25.4746
CX12311	Male	15	4.04696	4.09702	13.0223
CX12311	Male	15	4.40357	4.59211	15.8821
CX12311	Male	15	5.63354	5.44497	24.0916
CX12311	Male	15	4.90186	5.01852	19.3209
CX12311	Male	15	5.38785	5.23783	22.1644
CX12311	Male	15	4.4077	4.63942	16.0607
CX12311	Male	15	4.85785	4.85111	18.5087
CX12311	Male	15	5.2517	5.19386	21.423
CX12311	Male	14	4.64882	4.4044	16.0812
CX12311	Male	14	5.76761	5.66511	25.6622
CX12311	Male	14	5.93827	5.46979	25.5106
CX12311	Male	14	6.08996	5.58451	26.711
CX12311	Male	14	5.14804	5.23404	21.1626
CX12311	Male	14	5.8041	5.61088	25.5773
CX12311	Male	14	5.26555	4.5411	18.78
CX12311	Male	14	5.40808	5.47696	23.2633
CX12311	Male	14	5.62449	5.28831	23.3609
CX12311	Male	14	5.30068	5.15871	21.4764
CX12311	Male	14	5.82225	5.79782	26.5122
CX12311	Male	14	5.37771	5.46298	23.0737
CX12311	Male	14	6.0437	5.67217	26.9242
CX12311	Male	14	5.90419	5.11122	23.7014
CX12311	Male	14	5.31234	5.20716	21.7258
CX12311	Male	13	4.46676	4.14207	14.5312
CX12311	Male	13	4.71953	4.70717	17.4481
CX12311	Male	13	5.44162	5.31028	22.6953
CX12311	Male	13	6.34799	5.56202	27.7305
CX12311	Male	13	5.26278	4.93737	20.408
CX12311	Male	13	6.23343	6.14345	30.0766
CX12311	Male	13	5.69806	5.92327	26.5081
CX12311	Male	13	5.58487	5.83162	25.5795
CX12311	Male	13	5.65417	6.04551	26.8468
CX12311	Male	13	6.10482	6.80029	32.6054
CX12311	Male	13	6.1547	6.12921	29.6279
CX12311	Male	13	5.38785	5.65546	23.9317
CX12311	Male	13	6.62242	5.91897	30.7859
CX12311	Male	13	4.99963	4.85111	19.0488
CX12311	Male	13	6.1547	5.70288	27.5671
CX12311	Male	12	4.57296	5.11019	18.3537
CX12311	Male	12	4.33172	5.34777	18.1938
CX12311	Male	12	4.82896	5.15808	19.5629
CX12311	Male	12	4.39106	4.68478	16.1566
CX12311	Male	12	3.82398	4.57579	13.7427
CX12311	Male	12	5.31135	5.33202	22.2426
CX12311	Male	12	4.43067	5.04905	17.5699
CX12311	Male	12	5.38995	4.37039	18.501
CX12311	Male	12	5.24392	5.18935	21.3727
CX12311	Male	12	4.83967	5.27836	20.0634
CX12311	Male	12	5.07971	4.546	18.1367
CX12311	Male	12	5.15934	4.69031	19.0057
CX12311	Male	12	5.54615	4.89286	21.313
CX12311	Male	12	4.80074	4.75062	17.9122
CX12311	Male	12	5.46624	5.32838	22.8757
CX12311	Male	11	4.89682	5.00658	19.2551
CX12311	Male	11	5.25994	4.58003	18.9208
CX12311	Male	11	5.13923	5.00529	20.2031
CX12311	Male	11	4.50453	4.19514	14.8418
CX12311	Male	11	5.22909	5.11272	20.9976
CX12311	Male	11	4.81151	4.89286	18.4899
CX12311	Male	11	4.12201	5.15808	16.6989
CX12311	Male	11	5.31865	4.58568	19.1556
CX12311	Male	11	4.10155	4.2274	13.6179
CX12311	Male	11	4.89153	4.34663	16.6989
CX12311	Male	11	4.99753	4.91265	19.2824
CX12311	Male	11	5.84713	4.98586	22.8967
CX12311	Male	11	5.15055	4.99753	20.2162
CX12311	Male	11	4.87505	4.4887	17.1866
CX12311	Male	11	5.43091	5.35805	22.8544
CX12311	Male	9	4.73151	5.28815	19.6514
CX12311	Male	9	3.76601	3.20543	9.4811
CX12311	Male	9	4.61942	4.39548	15.9472
CX12311	Male	9	4.44961	4.55595	15.9218
CX12311	Male	9	3.92913	3.88775	11.9973
CX12311	Male	9	5.06824	3.76945	15.0046
CX12311	Male	9	4.58568	4.64734	16.7378
CX12311	Male	9	4.74107	4.68478	17.4444
CX12311	Male	9	4.36001	4.03154	13.8054
CX12311	Male	9	4.89286	4.46123	17.1438
CX12311	Male	9	5.21919	5.40793	22.1678
CX12311	Male	9	4.7137	4.33172	16.0366
CX12311	Male	9	4.78995	4.7994	18.0554
CX12311	Male	9	4.66541	4.56304	16.7199
CX12311	Male	9	5.34172	4.57862	19.209
CX13248	Male	13	5.35504	5.28815	22.2411
CX13248	Male	13	4.1094	4.19506	13.5396
CX13248	Male	13	4.92316	4.58564	17.731
CX13248	Male	13	4.77914	4.67642	17.5531
CX13248	Male	13	5.54734	5.36596	23.3788
CX13248	Male	13	5.03748	4.89159	19.3532
CX13248	Male	13	5.03748	4.89279	19.358
CX13248	Male	13	5.65126	5.6673	25.1542
CX13248	Male	13	5.1443	5.72531	23.1321
CX13248	Male	13	4.79945	5.08731	19.1765
CX13248	Male	13	4.75201	5.07844	18.9538
CX13248	Male	13	4.56312	4.64042	16.6306
CX13248	Male	13	5.11273	5.15437	20.6975
CX13248	Male	13	4.34658	4.30017	14.6799
CX13248	Male	13	4.83972	5.65825	21.5076
CX13248	Male	12	4.80081	5.3477	20.1638
CX13248	Male	12	5.23406	5.14806	21.1627
CX13248	Male	12	5.57754	5.40554	23.6795
CX13248	Male	12	4.97554	5.14055	20.0881
CX13248	Male	12	5.68777	6.03024	26.9381
CX13248	Male	12	6.30701	5.39002	26.6995
CX13248	Male	12	5.2931	5.26358	21.8817
CX13248	Male	12	4.98971	4.06981	15.9492
CX13248	Male	12	4.92316	5.27842	20.4098
CX13248	Male	12	5.18815	4.92316	20.0607
CX13248	Male	12	4.60953	5.15437	18.6605
CX13248	Male	12	4.43804	4.13448	14.4113
CX13248	Male	12	5.15812	4.73427	19.1794
CX13248	Male	12	5.11905	5.0682	20.3766
CX13248	Male	12	5.30282	5.87138	24.4533
CX13248	Male	11	5.65416	5.35811	23.7941
CX13248	Male	11	5.50605	5.42278	23.4505
CX13248	Male	11	6.26025	5.10267	25.0888
CX13248	Male	11	5.05113	4.7846	18.9812
CX13248	Male	11	4.75338	4.42661	16.5258
CX13248	Male	11	4.47081	4.42422	15.535
CX13248	Male	11	5.18833	4.80354	19.574
CX13248	Male	11	5.00762	5.2071	20.4794
CX13248	Male	11	4.8119	5.25453	19.8582
CX13248	Male	11	5.06837	5.22945	20.8168
CX13248	Male	11	5.43421	5.61082	23.9471
CX13248	Male	11	4.52183	4.69553	16.6759
CX13248	Male	11	4.52899	4.45698	15.8538
CX13248	Male	11	5.10335	5.02503	20.1411
CX13248	Male	11	5.33968	4.988	20.9185
CX13248	Male	10	5.12024	4.82624	19.4084
CX13248	Male	10	5.27706	5.10898	21.1746
CX13248	Male	10	4.78324	5.05165	18.9778
CX13248	Male	10	5.57754	5.29787	23.2078
CX13248	Male	10	4.48156	4.51176	15.8805
CX13248	Male	10	5.39599	5.3477	22.6635
CX13248	Male	10	5.23406	5.23781	21.5317
CX13248	Male	10	3.78827	3.53931	10.5305
CX13248	Male	10	5.42346	5.42346	23.1016
CX13248	Male	10	5.35504	5.73879	24.1364
CX13248	Male	10	5.08731	5.18935	20.7344
CX13248	Male	10	3.95702	3.8828	12.0671
CX13248	Male	10	4.44231	4.10155	14.3102
CX13248	Male	10	3.98142	3.52822	11.0328
CX13248	Male	10	4.18277	4.4249	14.5364
CX13248	Male	9	4.1408	4.1094	13.3645
CX13248	Male	9	4.89688	5.02588	19.3295
CX13248	Male	9	4.82897	4.74655	18.0021
CX13248	Male	9	4.91258	4.75201	18.3348
CX13248	Male	9	4.44231	4.6696	16.2921
CX13248	Male	9	5.48984	5.26972	22.7215
CX13248	Male	9	4.80081	4.17663	15.7482
CX13248	Male	9	5.07844	3.99439	15.932
CX13248	Male	9	4.25035	4.47712	14.9456
CX13248	Male	9	4.74655	4.51602	16.8354
CX13248	Male	9	4.97554	5.09362	19.9048
CX13248	Male	9	4.41757	5.08731	17.6507
CX13248	Male	9	4.45971	5.01052	17.5501
CX13248	Male	9	4.4249	5.0682	17.6136
CX13248	Male	9	4.59127	5.17433	18.6585
CX13248	Male	8	5.17433	5.2402	21.2957
CX13248	Male	8	4.75201	4.66823	17.4229
CX13248	Male	8	5.09874	4.83699	19.3699
CX13248	Male	8	3.89116	4.42627	13.5272
CX13248	Male	8	4.50732	4.67642	16.5547
CX13248	Male	8	5.90004	5.64785	26.1715
CX13248	Male	8	5.05165	5.59717	22.2071
CX13248	Male	8	4.1094	4.54606	14.6725
CX13248	Male	8	3.86437	4.43071	13.4475
CX13248	Male	8	4.264	4.50732	15.0947
CX13248	Male	8	4.19506	4.23345	13.9483
CX13248	Male	8	5.75688	5.77582	26.1151
CX13248	Male	8	4.94415	5.55656	21.5768
CX13248	Male	8	4.92452	4.12049	15.9369
CX13248	Male	8	4.02187	4.17663	13.193
CX13248	Male	7	4.7846	4.59127	17.2532
CX13248	Male	7	5.1931	5.2402	21.373
CX13248	Male	7	5.93827	5.61918	26.2073
CX13248	Male	7	4.73563	4.52882	16.8443
CX13248	Male	7	5.332	5.89885	24.7029
CX13248	Male	7	5.77582	5.08731	23.0777
CX13248	Male	7	5.46151	5.33081	22.8663
CX13248	Male	7	5.05284	5.42704	21.5372
CX13248	Male	7	4.59127	4.60254	16.5966
CX13248	Male	7	5.50758	5.91642	25.5924
CX13248	Male	7	5.23781	4.84364	19.9256
CX13248	Male	7	4.91258	5.26972	20.3323
CX13248	Male	7	5.3477	5.11273	21.4739
CX13248	Male	7	5.60297	6.36724	28.0194
CX13248	Male	7	4.68615	5.32842	19.6112
CX13248	Male	6	4.43804	4.34658	15.1506
CX13248	Male	6	5.04909	5.46987	21.691
CX13248	Male	6	4.71362	5.2931	19.5954
CX13248	Male	6	4.58564	3.78827	13.6436
CX13248	Male	6	5.12024	5.57413	22.416
CX13248	Male	6	4.79535	4.98578	18.7778
CX13248	Male	6	5.25248	5.58454	23.0379
CX13248	Male	6	4.96889	5.29787	20.6752
CX13248	Male	6	5.12024	5.71627	22.9876
CX13248	Male	6	5.11905	5.60297	22.5267
CX13248	Male	6	4.98971	5.09362	19.9614
CX13248	Male	6	5.69801	5.53557	24.7728
CX13248	Male	6	5.25999	4.92845	20.3603
CX13248	Male	6	4.71362	4.44231	16.4457
CX13248	Male	6	4.66533	4.55169	16.678
CX13248	Male	5	4.57472	4.57302	16.4307
CX13248	Male	5	5.30692	4.86975	20.2973
CX13248	Male	5	5.15096	5.34514	21.624
CX13248	Male	5	3.90703	4.45374	13.6666
CX13248	Male	5	4.64315	4.12203	15.0319
CX13248	Male	5	4.8276	4.64315	17.6049
CX13248	Male	5	5.2919	4.83306	20.0874
CX13248	Male	5	5.3477	4.83972	20.3272
CX13248	Male	5	4.82624	4.99756	18.9433
CX13248	Male	5	4.3703	4.58564	15.7399
CX13248	Male	5	5.3477	5.54734	23.2992
CX13248	Male	5	4.97554	4.82095	18.8392
CX13248	Male	5	4.89688	4.78989	18.4219
CX13248	Male	5	4.71362	4.98578	18.4577
CX13248	Male	5	4.54606	5.07963	18.1366
CX13248	Male	4	5.39599	4.70713	19.9488
CX13248	Male	4	5.13679	5.09977	20.5746
CX13248	Male	4	5.35811	5.54563	23.3374
CX13248	Male	4	4.64178	4.65509	16.9708
CX13248	Male	4	4.93732	5.00762	19.4184
CX13248	Male	4	5.45639	5.61082	24.0448
CX13248	Male	4	4.61738	4.85115	17.5926
CX13248	Male	4	5.88929	5.63675	26.0725
CX13248	Male	4	4.78085	5.05182	18.9689
CX13248	Male	4	5.09055	4.94619	19.7754
CX13248	Male	4	4.59127	5.76951	20.8047
CX13248	Male	4	4.61738	4.84808	17.5815
CX13248	Male	4	4.85115	4.66755	17.7838
CX13248	Male	4	5.69136	5.21068	23.2916
CX13248	Male	4	6.0142	5.6516	26.6956
CX13248	Male	3	5.15932	5.02213	20.3503
CX13248	Male	3	4.83972	5.20931	19.8012
CX13248	Male	3	4.18585	3.96197	13.0252
CX13248	Male	3	4.99756	4.90746	19.2621
CX13248	Male	3	5.55075	5.14806	22.4432
CX13248	Male	3	4.3703	4.90746	16.8445
CX13248	Male	3	5.15437	5.09362	20.6202
CX13248	Male	3	4.68069	5.34173	19.6373
CX13248	Male	3	4.50732	4.56312	16.1536
CX13248	Male	3	5.49103	5.33081	22.9899
CX13248	Male	3	4.39112	3.84935	13.2756
CX13248	Male	3	5.57874	5.33081	23.3571
CX13248	Male	3	6.07614	5.30896	25.3354
CX13248	Male	3	5.01684	5.64785	22.2537
CX13248	Male	3	5.09874	6.27629	25.1337
CX13248	Male	2	4.24727	4.52882	15.1072
CX13248	Male	2	4.89279	5.03629	19.3534
CX13248	Male	2	4.73563	5.65706	21.0406
CX13248	Male	2	5.0066	4.8863	19.2138
CX13248	Male	2	4.68478	5.07332	18.6669
CX13248	Male	2	5.72531	5.81165	26.133
CX13248	Male	2	5.35742	5.23286	22.0184
CX13248	Male	2	4.10155	4.66533	15.0287
CX13248	Male	2	4.64741	4.68069	17.0848
CX13248	Male	2	5.61218	5.46987	24.1101
CX13248	Male	2	5.15437	4.93493	19.9778
CX13248	Male	2	5.504	5.46629	23.6298
CX13248	Male	2	4.37627	4.44231	15.2687
CX13248	Male	2	4.50732	4.28208	15.1588
CX13248	Male	2	5.18815	4.8863	19.9105
CX13248	Male	1	5.42346	4.96019	21.1283
CX13248	Male	1	5.55024	5.67225	24.7262
CX13248	Male	1	5.28832	4.988	20.7173
CX13248	Male	1	4.98425	4.57302	17.9016
CX13248	Male	1	5.01854	4.69946	18.5232
CX13248	Male	1	5.64972	5.70347	25.3079
CX13248	Male	1	4.33447	4.25052	14.47
CX13248	Male	1	5.13679	4.7846	19.3031
CX13248	Male	1	4.55066	4.63547	16.5675
CX13248	Male	1	5.01052	4.71106	18.5392
CX13248	Male	1	5.2489	4.74877	19.5767
CX13248	Male	1	3.88553	4.03262	12.3063
CX13248	Male	1	4.44965	4.5435	15.8784
CX13248	Male	1	4.85337	5.09977	19.4394
CX13248	Male	1	3.43932	3.51781	9.50243
CX13248	Hermaphrodite	1	3.17517	2.48444	6.19565
CX13248	Hermaphrodite	1	2.69791	2.75149	5.83022
CX13248	Hermaphrodite	1	3.80123	3.34479	9.9858
CX13248	Hermaphrodite	1	2.75149	2.95796	6.39218
CX13248	Hermaphrodite	1	3.37942	3.13815	8.32925
CX13248	Hermaphrodite	1	3.43778	2.57215	6.94488
CX13248	Hermaphrodite	1	3.69135	3.38215	9.80546
CX13248	Hermaphrodite	1	3.02263	2.71651	6.4489
CX13248	Hermaphrodite	1	3.4714	2.6974	7.35426
CX13248	Hermaphrodite	1	3.58129	3.24872	9.13778
CX13248	Hermaphrodite	1	3.66967	3.17398	9.1479
CX13248	Hermaphrodite	1	3.49904	3.32294	9.13191
CX13248	Hermaphrodite	1	3.3999	3.9688	10.5978
CX13248	Hermaphrodite	1	3.78673	3.56508	10.6029
CX13248	Hermaphrodite	1	3.6277	3.39768	9.68064
CX13248	Hermaphrodite	2	3.55586	2.86172	7.99211
CX13248	Hermaphrodite	2	3.18541	3.51457	8.79281
CX13248	Hermaphrodite	2	3.66012	3.54153	10.1807
CX13248	Hermaphrodite	2	2.84909	3.25606	7.28598
CX13248	Hermaphrodite	2	3.70363	3.13712	9.12534
CX13248	Hermaphrodite	2	3.29325	3.63777	9.40914
CX13248	Hermaphrodite	2	3.37516	3.01529	7.99306
CX13248	Hermaphrodite	2	3.1878	3.09276	7.74332
CX13248	Hermaphrodite	2	3.31305	3.51781	9.15356
CX13248	Hermaphrodite	2	2.77777	3.49238	7.61917
CX13248	Hermaphrodite	2	3.94235	3.3784	10.4606
CX13248	Hermaphrodite	2	3.30673	3.66319	9.51368
CX13248	Hermaphrodite	2	3.69237	3.86863	11.219
CX13248	Hermaphrodite	2	3.69135	3.12364	9.05599
CX13248	Hermaphrodite	2	3.75789	4.04251	11.9312
CX13248	Hermaphrodite	3	3.37328	3.98006	10.5446
CX13248	Hermaphrodite	3	3.52105	3.57548	9.88774
CX13248	Hermaphrodite	3	3.30469	2.36944	6.14986
CX13248	Hermaphrodite	3	4.66755	4.04695	14.8356
CX13248	Hermaphrodite	3	2.90199	4.3703	9.96086
CX13248	Hermaphrodite	3	3.99439	4.38788	13.7656
CX13248	Hermaphrodite	3	3.75397	3.58333	10.565
CX13248	Hermaphrodite	3	3.62975	3.19463	9.10723
CX13248	Hermaphrodite	3	2.76855	2.95676	6.42923
CX13248	Hermaphrodite	3	3.52702	3.999	11.0777
CX13248	Hermaphrodite	3	3.39376	2.84397	7.58047
CX13248	Hermaphrodite	3	4.82624	4.93886	18.7208
CX13248	Hermaphrodite	3	4.07783	3.82222	12.2415
CX13248	Hermaphrodite	3	3.7968	3.66319	10.9236
CX13248	Hermaphrodite	3	2.8165	2.6189	5.79321
CX13248	Hermaphrodite	4	2.83612	2.78562	6.20492
CX13248	Hermaphrodite	4	3.6248	3.29223	9.37268
CX13248	Hermaphrodite	4	3.38693	3.10556	8.26106
CX13248	Hermaphrodite	4	3.45979	3.45979	9.40135
CX13248	Hermaphrodite	4	3.89116	3.62053	11.0647
CX13248	Hermaphrodite	4	3.75567	3.42021	10.0886
CX13248	Hermaphrodite	4	2.97724	3.06307	7.16242
CX13248	Hermaphrodite	4	3.94235	3.29888	10.2144
CX13248	Hermaphrodite	4	3.3197	3.22517	8.40895
CX13248	Hermaphrodite	4	2.99584	2.4609	5.79031
CX13248	Hermaphrodite	4	3.50109	3.08201	8.47474
CX13248	Hermaphrodite	4	3.18541	2.79466	6.99173
CX13248	Hermaphrodite	4	3.12979	3.51167	8.63213
CX13248	Hermaphrodite	4	3.54289	2.57403	7.16244
CX13248	Hermaphrodite	4	2.16007	2.53239	4.29624
CX13248	Hermaphrodite	5	2.90574	3.26663	7.455
CX13248	Hermaphrodite	5	2.61157	3.26561	6.69816
CX13248	Hermaphrodite	5	3.77137	3.48129	10.3117
CX13248	Hermaphrodite	5	3.59954	3.40946	9.63879
CX13248	Hermaphrodite	5	3.27773	3.69237	9.50534
CX13248	Hermaphrodite	5	3.19804	3.10556	7.80033
CX13248	Hermaphrodite	5	3.83929	3.57207	10.7711
CX13248	Hermaphrodite	5	2.56515	3.16135	6.36908
CX13248	Hermaphrodite	5	3.22517	2.69791	6.83392
CX13248	Hermaphrodite	5	3.15794	2.73016	6.77145
CX13248	Hermaphrodite	5	3.45502	3.5074	9.51755
CX13248	Hermaphrodite	5	3.34598	2.91581	7.66253
CX13248	Hermaphrodite	5	3.28336	2.56089	6.60387
CX13248	Hermaphrodite	5	3.23404	2.93629	7.4582
CX13248	Hermaphrodite	5	4.24454	3.64425	12.1487
CX13248	Hermaphrodite	6	4.58564	4.32423	15.574
CX13248	Hermaphrodite	6	3.12364	2.96649	7.2777
CX13248	Hermaphrodite	6	3.50109	3.50109	9.62711
CX13248	Hermaphrodite	6	2.48444	3.35246	6.54159
CX13248	Hermaphrodite	6	2.73152	2.15324	4.61942
CX13248	Hermaphrodite	6	3.80123	3.17398	9.47586
CX13248	Hermaphrodite	6	3.40621	3.12893	8.37063
CX13248	Hermaphrodite	6	2.81684	2.51942	5.57383
CX13248	Hermaphrodite	6	3.00556	3.4127	8.05589
CX13248	Hermaphrodite	6	4.18397	3.6806	12.0947
CX13248	Hermaphrodite	6	3.32294	3.15794	8.2417
CX13248	Hermaphrodite	6	3.02962	2.93577	6.98556
CX13248	Hermaphrodite	6	3.55177	3.71984	10.3767
CX13248	Hermaphrodite	6	3.99439	3.61354	11.3363
CX13248	Hermaphrodite	6	2.84397	2.6532	5.92633
CX13248	Hermaphrodite	7	3.39376	3.21954	8.58153
CX13248	Hermaphrodite	7	3.31663	2.81411	7.33041
CX13248	Hermaphrodite	7	3.62958	2.66532	7.59792
CX13248	Hermaphrodite	7	2.99242	3.31271	7.78567
CX13248	Hermaphrodite	7	2.83612	2.83988	6.32579
CX13248	Hermaphrodite	7	3.18541	2.36585	5.91893
CX13248	Hermaphrodite	7	2.82452	3.05829	6.78443
CX13248	Hermaphrodite	7	2.98611	2.71139	6.35898
CX13248	Hermaphrodite	7	2.96171	2.73152	6.35386
CX13248	Hermaphrodite	7	2.82452	2.44469	5.42323
CX13248	Hermaphrodite	7	3.16886	3.06307	7.62342
CX13248	Hermaphrodite	7	3.18729	3.31663	8.30249
CX13248	Hermaphrodite	7	3.15794	3.22517	7.9992
CX13248	Hermaphrodite	7	3.86949	2.8781	8.7468
CX13248	Hermaphrodite	7	3.57207	3.64476	10.2254
CX13248	Hermaphrodite	8	2.71548	2.6544	5.66113
CX13248	Hermaphrodite	8	3.58436	3.08201	8.67631
CX13248	Hermaphrodite	8	3.67258	2.6503	7.64462
CX13248	Hermaphrodite	8	2.40408	2.91837	5.51034
CX13248	Hermaphrodite	8	3.92836	3.43181	10.5882
CX13248	Hermaphrodite	8	3.23353	3.05658	7.76253
CX13248	Hermaphrodite	8	3.86283	4.01077	12.1681
CX13248	Hermaphrodite	8	3.68452	3.56405	10.3137
CX13248	Hermaphrodite	8	3.62053	3.3784	9.60668
CX13248	Hermaphrodite	8	2.92468	2.75149	6.32028
CX13248	Hermaphrodite	8	3.86437	3.30673	10.0362
CX13248	Hermaphrodite	8	3.86283	3.5731	10.8403
CX13248	Hermaphrodite	8	3.94406	4.11742	12.7543
CX13248	Hermaphrodite	8	3.78673	3.01648	8.9713
CX13248	Hermaphrodite	8	3.94406	3.27773	10.1533
CX13248	Hermaphrodite	9	5.03629	4.85968	19.2224
CX13248	Hermaphrodite	9	5.02503	5.09055	20.0906
CX13248	Hermaphrodite	9	4.5464	4.08654	14.5919
CX13248	Hermaphrodite	9	3.31868	3.28336	8.55802
CX13248	Hermaphrodite	9	4.23584	4.22304	14.0493
CX13248	Hermaphrodite	9	3.35775	3.58146	9.44492
CX13248	Hermaphrodite	9	4.32611	4.60748	15.6549
CX13248	Hermaphrodite	9	5.30948	4.8706	20.3107
CX13248	Hermaphrodite	9	4.56107	4.479	16.0449
CX13248	Hermaphrodite	9	3.16596	3.57207	8.8821
CX13248	Hermaphrodite	9	5.02281	4.74416	18.7153
CX13248	Hermaphrodite	9	4.3546	4.52183	15.4651
CX13248	Hermaphrodite	10	3.16715	3.3284	8.27933
CX13248	Hermaphrodite	10	3.49802	3.31305	9.10205
CX13248	Hermaphrodite	10	3.90788	2.74739	8.43241
CX13248	Hermaphrodite	10	3.98791	4.55169	14.2563
CX13248	Hermaphrodite	10	4.78324	3.86932	14.536
CX13248	Hermaphrodite	10	3.76779	3.50433	10.3701
CX13248	Hermaphrodite	10	3.86283	3.92836	11.9181
CX13248	Hermaphrodite	10	4.69024	4.20905	15.5049
CX13248	Hermaphrodite	10	3.45979	2.69671	7.32782
CX13248	Hermaphrodite	10	4.84364	4.78989	18.2217
CX13248	Hermaphrodite	10	3.94388	4.03961	12.5128
CX13248	Hermaphrodite	10	3.71694	3.48129	10.1629
CX13248	Hermaphrodite	10	3.72633	3.97989	11.6477
CX13248	Hermaphrodite	10	4.00736	3.66319	11.5294
CX13248	Hermaphrodite	10	3.9961	3.86932	12.144
CX13248	Hermaphrodite	11	3.84935	3.38693	10.2396
CX13248	Hermaphrodite	11	3.31868	3.75789	9.79489
CX13248	Hermaphrodite	11	2.93629	2.8165	6.49528
CX13248	Hermaphrodite	11	3.41372	3.72667	9.99168
CX13248	Hermaphrodite	11	3.98313	2.96649	9.28019
CX13248	Hermaphrodite	11	4.1966	4.4249	14.5845
CX13248	Hermaphrodite	11	3.19804	2.79858	7.0293
CX13248	Hermaphrodite	11	3.24872	2.99584	7.64399
CX13248	Hermaphrodite	11	2.82571	2.65935	5.90191
CX13248	Hermaphrodite	11	3.0402	3.05249	7.28864
CX13248	Hermaphrodite	11	3.51457	3.74817	10.3462
CX13248	Hermaphrodite	11	3.69339	3.15794	9.1605
CX13248	Hermaphrodite	11	3.22517	2.72214	6.8953
CX13248	Hermaphrodite	11	3.55996	3.74032	10.4579
CX13248	Hermaphrodite	11	2.8095	2.85813	6.3067
CX13248	Hermaphrodite	12	3.81762	3.83451	11.4972
CX13248	Hermaphrodite	12	3.2738	3.60313	9.2645
CX13248	Hermaphrodite	12	3.74066	3.74066	10.9897
CX13248	Hermaphrodite	12	3.67787	3.30929	9.55919
CX13248	Hermaphrodite	12	3.09924	2.89687	7.05138
CX13248	Hermaphrodite	12	3.94235	3.86096	11.9547
CX13248	Hermaphrodite	12	3.8113	4.38003	13.1111
CX13248	Hermaphrodite	12	3.6277	3.86283	11.0059
CX13248	Hermaphrodite	12	3.71984	3.44341	10.0601
CX13248	Hermaphrodite	12	3.55091	3.1105	8.67482
CX13248	Hermaphrodite	12	3.0001	3.02962	7.13863
CX13248	Hermaphrodite	12	3.36117	2.91888	7.70542
CX13248	Hermaphrodite	12	4.08671	2.86957	9.21043
CX13248	Hermaphrodite	12	2.88987	3.32431	7.54519
CX13248	Hermaphrodite	12	2.3923	3.24326	6.09379
CX13248	Hermaphrodite	13	4.35034	4.18363	14.2944
CX13248	Hermaphrodite	13	3.9014	3.97085	12.1673
CX13248	Hermaphrodite	13	3.86522	3.50382	10.6367
CX13248	Hermaphrodite	13	4.17834	3.86898	12.6967
CX13248	Hermaphrodite	13	4.08619	4.26997	13.7036
CX13248	Hermaphrodite	13	3.6277	3.94406	11.2374
CX13248	Hermaphrodite	13	3.63777	3.75789	10.7367
CX13248	Hermaphrodite	13	4.11486	4.30665	13.9183
CX13248	Hermaphrodite	13	3.21169	2.8235	7.12214
CX13248	Hermaphrodite	13	3.19975	3.20657	8.05835
CX13248	Hermaphrodite	13	3.54016	3.8311	10.6521
CX13248	Hermaphrodite	13	3.38215	2.49298	6.62219
CX13248	Hermaphrodite	13	2.87844	2.79858	6.32682
CX13248	Hermaphrodite	13	2.85813	2.70217	6.06577
CX13248	Hermaphrodite	13	3.31663	2.29282	5.97252
CX13248	Hermaphrodite	14	3.85447	3.1878	9.65042
CX13248	Hermaphrodite	14	3.43932	3.13013	8.4552
CX13248	Hermaphrodite	14	2.30511	3.6207	6.55502
CX13248	Hermaphrodite	14	3.12893	2.83612	6.96965
CX13248	Hermaphrodite	14	3.81198	4.35477	13.0379
CX13248	Hermaphrodite	14	4.3703	3.92546	13.4738
CX13248	Hermaphrodite	14	3.16715	3.43505	8.54461
CX13248	Hermaphrodite	14	3.03542	2.68289	6.39606
CX13248	Hermaphrodite	14	3.26783	3.55108	9.11402
CX13248	Hermaphrodite	14	3.05829	3.48129	8.36198
CX13248	Hermaphrodite	14	3.20589	2.75149	6.92797
CX13248	Hermaphrodite	14	2.72367	3.232	6.91379
CX13248	Hermaphrodite	14	3.33267	3.40894	8.92282
CX13248	Hermaphrodite	14	4.70952	4.8276	17.8566
CX13248	Hermaphrodite	14	2.59911	3.96846	8.10096
CX13248	Hermaphrodite	15	4.39112	4.41757	15.2352
CX13248	Hermaphrodite	15	3.19804	2.53666	6.37141
CX13248	Hermaphrodite	15	3.12433	2.85148	6.99707
CX13248	Hermaphrodite	15	1.76692	1.87613	2.60358
CX13248	Hermaphrodite	15	4.47285	4.37627	15.3737
CX13248	Hermaphrodite	15	4.17185	3.70534	12.1408
CX13248	Hermaphrodite	15	4.43804	4.32269	15.0673
CX13248	Hermaphrodite	15	3.57207	4.34539	12.191
CX13248	Hermaphrodite	16	2.36585	2.60457	4.83965
CX13248	Hermaphrodite	16	3.75789	3.39768	10.0281
CX13248	Hermaphrodite	16	2.76429	3.42072	7.4266
CX13248	Hermaphrodite	16	2.6544	2.81991	5.87884
CX13248	Hermaphrodite	16	2.44503	2.70508	5.19461
CX13248	Hermaphrodite	16	2.79858	2.45237	5.3903
CX13248	Hermaphrodite	16	2.80712	2.92605	6.45107
CX13248	Hermaphrodite	16	4.14745	4.38412	14.2808
CX13248	Hermaphrodite	16	3.47276	3.52685	9.61949
CX13248	Hermaphrodite	16	2.0326	2.82452	4.50907
CX13248	Hermaphrodite	16	2.47216	3.10709	6.03282
CX13248	Hermaphrodite	17	3.51781	2.97997	8.2333
CX13248	Hermaphrodite	17	4.25939	3.94235	13.1884
CX13248	Hermaphrodite	17	4.73154	4.93886	18.3535
CX13248	Hermaphrodite	17	3.00539	3.66848	8.65919
CX13248	Hermaphrodite	17	2.88697	3.26561	7.40452
CX13248	Hermaphrodite	17	3.73946	3.14753	9.2442
CX13248	Hermaphrodite	17	3.35246	2.13294	5.61606
CX13248	Hermaphrodite	17	4.47081	3.19804	11.2295
CX13248	Hermaphrodite	17	3.999	3.6207	11.3719
CX13248	Hermaphrodite	17	3.6806	3.01887	8.72676
CX13248	Hermaphrodite	17	3.4429	3.49238	9.44358
CX13248	Hermaphrodite	17	2.35476	2.7189	5.0284
CX13248	Hermaphrodite	17	3.07348	2.24146	5.41067
CX13248	Hermaphrodite	17	3.46252	3.09924	8.42826
CX13248	Hermaphrodite	17	2.77708	2.93629	6.40438
CX13248	Hermaphrodite	18	2.05479	1.80992	2.9209
CX13248	Hermaphrodite	18	3.57207	3.55996	9.98745
CX13248	Hermaphrodite	18	4.40358	2.76855	9.5752
CX13248	Hermaphrodite	18	3.46457	2.48001	6.74827
CX13248	Hermaphrodite	18	2.93816	2.82452	6.51794
CX13248	Hermaphrodite	18	3.35468	2.86803	7.55658
CX13248	Hermaphrodite	18	3.25128	2.91837	7.45219
CX13248	Hermaphrodite	18	2.61481	2.69398	5.53255
CX13248	Hermaphrodite	18	3.51593	2.85182	7.87504
CX13248	Hermaphrodite	18	3.09549	2.55628	6.21481
CX13248	Hermaphrodite	18	2.93816	3.29223	7.59724
CX13248	Hermaphrodite	18	2.81684	2.66668	5.89961
CX13248	Hermaphrodite	19	5.13458	4.94841	19.9554
CX13248	Hermaphrodite	19	2.57932	2.78562	5.64307
CX13248	Hermaphrodite	19	2.53666	2.55952	5.09931
CX13248	Hermaphrodite	19	3.13712	2.79466	6.88573
CX13248	Hermaphrodite	19	4.1408	4.21059	13.6936
CX13248	Hermaphrodite	19	4.75065	4.50015	16.7907
CX13248	Hermaphrodite	19	3.86437	2.98594	9.06253
CX13248	Hermaphrodite	19	5.47926	5.33081	22.9406
CX13248	Hermaphrodite	19	3.7695	3.59187	10.6339
CX13248	Hermaphrodite	19	3.98313	4.6696	14.6081
CX13248	Hermaphrodite	19	4.36006	4.27458	14.6378
CX13248	Hermaphrodite	19	4.31672	4.22748	14.3326
CX13248	Hermaphrodite	19	4.34658	4.08415	13.9425
CX13248	Hermaphrodite	19	4.00088	4.64315	14.5901
CX13248	Hermaphrodite	19	3.80192	3.78144	11.2915
CX12311	Hermaphrodite	1	5.37773	5.29037	22.3447
CX12311	Hermaphrodite	1	3.61968	2.30511	6.55316
CX12311	Hermaphrodite	1	3.15794	2.54519	6.31268
CX12311	Hermaphrodite	2	3.93296	3.61968	11.181
CX12311	Hermaphrodite	2	4.02442	4.19711	13.2661
CX12311	Hermaphrodite	2	2.61157	3.31868	6.80701
CX12311	Hermaphrodite	2	3.47396	3.64476	9.94451
CX12311	Hermaphrodite	2	4.43412	3.70414	12.8999
CX12311	Hermaphrodite	2	3.49904	3.44341	9.46298
CX12311	Hermaphrodite	2	3.55074	3.17398	8.85143
CX12311	Hermaphrodite	2	4.60168	4.45374	16.0965
CX12311	Hermaphrodite	2	4.3587	4.70492	16.1064
CX12311	Hermaphrodite	2	3.6248	3.55074	10.1086
CX12311	Hermaphrodite	2	4.02715	3.50109	11.0737
CX12311	Hermaphrodite	2	4.09694	4.73256	15.2281
CX12311	Hermaphrodite	2	3.77905	3.74612	11.1187
CX12311	Hermaphrodite	2	3.90788	4.1094	12.6127
CX12311	Hermaphrodite	2	4.52507	4.28379	15.2245
CX12311	Hermaphrodite	2	4.22987	4.1024	13.6287
CX12311	Hermaphrodite	2	3.58845	3.88075	10.9374
CX12311	Hermaphrodite	2	3.29325	3.46457	8.96117
CX12311	Hermaphrodite	2	4.8503	4.8503	18.4768
CX12311	Hermaphrodite	2	4.02715	4.02715	12.7376
CX12311	Hermaphrodite	2	4.04695	4.01077	12.7481
CX12311	Hermaphrodite	2	3.98893	4.62455	14.4882
CX12311	Hermaphrodite	2	3.89116	3.98347	12.1739
CX12311	Hermaphrodite	2	4.01077	3.92546	12.3654
CX12311	Hermaphrodite	3	5.23218	5.03885	20.7064
CX12311	Hermaphrodite	3	3.96607	3.73946	11.6482
CX12311	Hermaphrodite	3	3.72479	3.95225	11.5621
CX12311	Hermaphrodite	3	2.91837	3.33182	7.6368
CX12311	Hermaphrodite	3	3.10214	2.44008	5.94505
CX12311	Hermaphrodite	3	3.45194	2.29572	6.22405
CX12311	Hermaphrodite	3	4.14643	4.21434	13.7244
CX12311	Hermaphrodite	3	4.15957	4.31416	14.094
CX12311	Hermaphrodite	3	5.35811	5.37773	22.6308
CX12311	Hermaphrodite	4	3.86573	3.02604	9.18748
CX12311	Hermaphrodite	4	4.37371	3.93672	13.523
CX12311	Hermaphrodite	4	2.75149	2.09762	4.53297
CX12311	Hermaphrodite	4	3.59954	2.88697	8.16169
CX12311	Hermaphrodite	4	3.02604	3.51781	8.36059
CX12311	Hermaphrodite	4	2.94567	3.07262	7.10859
CX12311	Hermaphrodite	4	3.33182	3.22517	8.43964
CX12311	Hermaphrodite	4	3.83929	3.13934	9.46627
CX12311	Hermaphrodite	4	3.20708	2.37046	5.9708
CX12311	Hermaphrodite	4	4.27952	4.09694	13.7704
CX12311	Hermaphrodite	4	4.13858	4.37371	14.2165
CX12311	Hermaphrodite	4	4.09609	3.78878	12.1887
CX12311	Hermaphrodite	4	3.81557	3.71694	11.1387
CX12311	Hermaphrodite	4	3.97716	4.11827	12.8641
CX12311	Hermaphrodite	4	5.13679	5.08048	20.4968
CX12311	Hermaphrodite	4	3.64783	3.46457	9.926
CX12311	Hermaphrodite	4	3.63282	3.93945	11.2401
CX12311	Hermaphrodite	4	2.99106	2.76326	6.49138
CX12311	Hermaphrodite	4	3.81079	3.82137	11.4373
CX12311	Hermaphrodite	5	2.95762	3.06307	7.11522
CX12311	Hermaphrodite	5	3.46252	2.90574	7.90205
CX12311	Hermaphrodite	5	3.23353	2.49878	6.34592
CX12311	Hermaphrodite	5	4.30512	2.75371	9.31092
CX12311	Hermaphrodite	5	3.74271	3.62326	10.6506
CX12311	Hermaphrodite	5	3.7509	3.83792	11.3063
CX12311	Hermaphrodite	5	3.6277	4.1094	11.7085
CX12311	Hermaphrodite	5	4.14199	4.31758	14.0456
CX12311	Hermaphrodite	6	4.01077	3.88075	12.2246
CX12311	Hermaphrodite	6	3.83451	3.8985	11.7408
CX12311	Hermaphrodite	6	3.85823	3.05829	9.26736
CX12311	Hermaphrodite	6	3.19804	3.25998	8.1882
CX12311	Hermaphrodite	6	4.20223	4.02442	13.2823
CX12311	Hermaphrodite	6	3.07262	2.57232	6.20761
CX12311	Hermaphrodite	6	3.55074	3.59954	10.0382
CX12311	Hermaphrodite	6	3.08201	3.08201	7.46032
CX12311	Hermaphrodite	6	3.36543	2.51942	6.65935
CX12311	Hermaphrodite	6	3.29325	3.50109	9.05562
CX12311	Hermaphrodite	6	3.94406	3.5074	10.8647
CX12311	Hermaphrodite	6	3.27773	3.19804	8.23278
CX12311	Hermaphrodite	6	3.75789	3.38386	9.98727
CX12311	Hermaphrodite	6	3.33728	3.45092	9.04518
CX12311	Hermaphrodite	6	3.60176	3.33301	9.42848
CX12311	Hermaphrodite	6	3.67787	3.42072	9.88105
CX12311	Hermaphrodite	6	3.39376	3.38215	9.01497
CX12311	Hermaphrodite	7	2.86035	2.73494	6.14408
CX12311	Hermaphrodite	7	3.56115	2.87452	8.03979
CX12311	Hermaphrodite	7	3.19787	2.82913	7.10564
CX12311	Hermaphrodite	7	3.88553	4.32525	13.1993
CX12311	Hermaphrodite	7	4.71106	5.35811	19.8253
CX12311	Hermaphrodite	7	3.34479	3.60057	9.45865
CX12311	Hermaphrodite	7	2.78954	3.20589	7.02378
CX12311	Hermaphrodite	7	3.14753	2.6503	6.55172
CX12311	Hermaphrodite	7	3.17142	3.05505	7.6096
CX12311	Hermaphrodite	7	2.82571	2.30135	5.10742
CX12311	Hermaphrodite	7	3.16715	2.73152	6.7946
CX12311	Hermaphrodite	7	3.74237	3.74237	10.9997
CX12311	Hermaphrodite	8	4.21519	4.06401	13.4543
CX12311	Hermaphrodite	8	4.39197	3.51047	12.1092
CX12311	Hermaphrodite	8	3.42498	3.83502	10.3161
CX12311	Hermaphrodite	8	3.33267	2.78937	7.3011
CX12311	Hermaphrodite	8	3.78878	3.99815	11.8973
CX12311	Hermaphrodite	8	3.37652	3.37652	8.95426
CX12311	Hermaphrodite	8	4.46876	4.3703	15.3387
CX12311	Hermaphrodite	8	3.46252	3.07348	8.3582
CX12311	Hermaphrodite	8	3.8113	2.94942	8.82878
CX12311	Hermaphrodite	8	3.90635	3.77069	11.5686
CX12311	Hermaphrodite	8	4.43736	4.59929	16.029
CX12311	Hermaphrodite	8	4.17356	4.29386	14.0749
CX12311	Hermaphrodite	8	3.95225	4.06401	12.615
CX12311	Hermaphrodite	8	3.98893	3.92187	12.2868
CX12311	Hermaphrodite	8	3.95225	4.31758	13.4021
CX12311	Hermaphrodite	11	3.57207	3.08201	8.64657
CX12311	Hermaphrodite	11	4.52899	4.53462	16.1299
CX12311	Hermaphrodite	11	4.29386	3.98177	13.4281
CX12311	Hermaphrodite	11	3.50211	3.52702	9.70126
CX12311	Hermaphrodite	11	4.69246	4.83904	17.834
CX12311	Hermaphrodite	11	3.98194	3.22159	10.0752
CX12311	Hermaphrodite	12	4.25052	3.58436	11.9658
CX12311	Hermaphrodite	12	4.66055	4.2872	15.6928
CX12311	Hermaphrodite	12	5.33968	5.46697	22.9272
CX12311	Hermaphrodite	12	5.05182	4.52183	17.9412
CX12311	Hermaphrodite	12	4.7056	4.65509	17.2041
CX12311	Hermaphrodite	12	4.67062	4.52899	16.6137
CX12311	Hermaphrodite	12	3.40946	3.02604	8.10307
CX12311	Hermaphrodite	12	4.00019	4.41927	13.8842
CX12311	Hermaphrodite	12	3.4714	3.28216	8.94858
CX12311	Hermaphrodite	12	4.02442	4.29386	13.5719
CX12311	Hermaphrodite	12	3.86283	3.25998	9.89033
CX12311	Hermaphrodite	12	3.55996	2.76855	7.74082
CX12311	Hermaphrodite	12	3.67258	3.49802	10.0898
CX12311	Hermaphrodite	12	4.53394	4.50493	16.0418
CX12311	Hermaphrodite	12	4.15172	4.20922	13.7252
CX12311	Hermaphrodite	12	5.01854	5.15863	20.333
CX12311	Hermaphrodite	12	4.608	4.7846	17.316
CX12311	Hermaphrodite	13	5.95567	4.98578	23.3214
CX12311	Hermaphrodite	13	5.25658	5.15863	21.2975
CX12311	Hermaphrodite	13	5.35538	4.65748	19.5898
CX12311	Hermaphrodite	13	5.56202	5.56202	24.2971
CX12311	Hermaphrodite	13	6.10071	5.69136	27.2701
CX12311	Hermaphrodite	13	3.5074	3.96078	10.9108
CX12311	Hermaphrodite	13	3.90635	3.51781	10.7928
CX12311	Hermaphrodite	13	4.55715	4.57302	16.3676
CX12311	Hermaphrodite	13	3.99815	3.94406	12.3849
CX12311	Hermaphrodite	13	3.84304	3.83929	11.5882
CX12311	Hermaphrodite	13	4.10411	3.94406	12.7131
CX12311	Hermaphrodite	13	4.08551	4.2872	13.7566
CX12311	Hermaphrodite	13	3.76267	3.84782	11.371
CX12311	Hermaphrodite	13	4.35785	4.23584	14.4978
CX12311	Hermaphrodite	13	3.10214	3.40946	8.30686
CX12311	Hermaphrodite	14	3.77137	2.88697	8.5513
CX12311	Hermaphrodite	14	3.19804	3.31868	8.33564
CX12311	Hermaphrodite	14	3.53214	3.38062	9.37831
CX12311	Hermaphrodite	14	3.40946	3.21613	8.61208
CX12311	Hermaphrodite	14	3.05488	3.07621	7.38073
CX12311	Hermaphrodite	14	2.77777	2.48001	5.41051
CX12311	Hermaphrodite	14	2.9583	3.16272	7.34839
CX12311	Hermaphrodite	14	3.05778	2.96922	7.13079
CX12311	Hermaphrodite	14	2.5341	2.24368	4.46554
CX12311	Hermaphrodite	14	3.50109	3.62992	9.98135
CX12311	Hermaphrodite	14	2.78937	2.68477	5.8817
CX12311	Hermaphrodite	14	3.26988	3.26988	8.39755
CX12311	Hermaphrodite	14	3.43778	3.09719	8.36251
CX12311	Hermaphrodite	14	2.49298	2.14113	4.19228
CX12311	Hermaphrodite	14	3.35008	2.91854	7.6791
CX12311	Hermaphrodite	14	2.90574	2.90028	6.61892
CX12311	Hermaphrodite	15	4.31758	4.43736	15.0472
CX12311	Hermaphrodite	15	4.98885	4.45971	17.4742
CX12311	Hermaphrodite	15	4.96172	4.58462	17.8659
CX12311	Hermaphrodite	15	3.06085	2.5085	6.03041
CX12311	Hermaphrodite	15	4.79023	5.07366	19.0883
CX12311	Hermaphrodite	15	4.88988	4.96974	19.0863
CX12311	Hermaphrodite	16	3.55074	4.09609	11.423
CX12311	Hermaphrodite	16	4.00634	3.59954	11.3262
CX12311	Hermaphrodite	16	3.62975	3.57207	10.1832
CX12311	Hermaphrodite	16	3.44341	2.88697	7.80767
CX12311	Hermaphrodite	16	4.54827	2.78954	9.96481
CX12311	Hermaphrodite	16	3.76267	3.6248	10.712
CX12311	Hermaphrodite	16	4.03483	2.9583	9.3747
CX12311	Hermaphrodite	16	3.5905	2.98492	8.41738
CX12311	Hermaphrodite	16	3.59767	2.5085	7.08803
CX12311	Hermaphrodite	16	3.36117	3.02792	7.99326
CX12311	Hermaphrodite	16	3.4673	2.70217	7.3586
CX12311	Hermaphrodite	16	4.10036	3.18371	10.2528
CX12311	Hermaphrodite	16	5.71286	5.21051	23.3789
CX12311	Hermaphrodite	17	3.43403	3.05829	8.24845
CX12311	Hermaphrodite	17	3.6248	3.5731	10.1723
CX12311	Hermaphrodite	17	3.85447	2.93816	8.89469
CX12311	Hermaphrodite	17	3.56405	3.5074	9.81791
CX12311	Hermaphrodite	17	3.81557	2.85148	8.54514
CX12311	Hermaphrodite	17	3.81557	3.96607	11.8853
N2	Male	12	5.24392	4.63061	19.0715
N2	Male	12	6.16913	4.7027	22.7857
N2	Male	12	5.09371	4.22281	16.8937
N2	Male	12	5.50751	5.02207	21.7234
N2	Male	12	5.47215	4.20899	18.0895
N2	Male	12	4.89682	4.90738	18.8736
N2	Male	12	5.36951	5.7433	24.2206
N2	Male	12	5.36951	4.38959	18.5118
N2	Male	12	5.75568	5.24392	23.7051
N2	Male	12	5.13923	4.48726	18.1121
N2	Male	12	5.36106	5.07844	21.3831
N2	Male	12	5.24392	4.21053	17.3414
N2	Male	12	5.05289	4.82896	19.1639
N2	Male	12	5.15055	4.17659	16.8953
N2	Male	12	5.4437	5.51808	23.5924
N2	Male	11	5.24392	4.83967	19.9325
N2	Male	11	6.16913	5.18061	25.1012
N2	Male	11	5.09371	4.28215	17.1311
N2	Male	11	5.50751	5.56013	24.0508
N2	Male	11	5.47215	5.36589	23.0616
N2	Male	11	4.89682	5.76691	22.1793
N2	Male	11	5.36951	5.73879	24.2016
N2	Male	11	5.36951	5.22909	22.0521
N2	Male	11	5.75568	5.38034	24.3218
N2	Male	11	5.13923	5.34172	21.561
N2	Male	11	5.36106	5.47215	23.0409
N2	Male	11	5.24392	5.33081	21.9553
N2	Male	11	5.05289	5.39595	21.414
N2	Male	11	5.15055	5.9871	24.2192
N2	Male	11	5.4437	5.94263	25.4075
N2	Male	10	4.98586	5.90001	23.1038
N2	Male	10	5.07844	5.36106	21.3831
N2	Male	10	5.14049	5.80047	23.4184
N2	Male	10	5.39595	5.59724	23.7209
N2	Male	10	4.99494	4.77913	18.7486
N2	Male	10	5.31135	5.06824	21.1423
N2	Male	10	5.47924	5.01046	21.562
N2	Male	10	6.04625	5.36951	25.4982
N2	Male	10	5.1241	5.64788	22.7296
N2	Male	10	5.80605	5.29182	24.131
N2	Male	10	5.4615	5.60186	24.0289
N2	Male	10	5.02207	5.25994	20.7469
N2	Male	10	5.71167	5.7162	25.6425
N2	Male	10	5.25255	6.18903	25.5319
N2	Male	10	5.24392	5.88574	24.2408
N2	Male	9	4.44234	5.46506	19.0676
N2	Male	9	4.56871	5.15432	18.495
N2	Male	9	4.1408	5.54031	18.0181
N2	Male	9	5.02851	4.61942	18.2438
N2	Male	9	4.60679	4.75334	17.1984
N2	Male	9	5.44727	5.50281	23.5425
N2	Male	9	6.2359	5.54731	27.1689
N2	Male	9	5.56478	4.89682	21.4019
N2	Male	9	5.15934	5.84935	23.7023
N2	Male	9	4.95593	4.55026	17.7113
N2	Male	9	5.95568	6.47714	30.2973
N2	Male	9	5.31135	5.33081	22.2376
N2	Male	9	5.17436	5.7568	23.3953
N2	Male	9	4.28215	5.49457	18.4793
N2	Male	9	6.22343	5.68556	27.7903
N2	Male	8	5.30891	5.15055	21.4758
N2	Male	8	4.69031	6.12598	22.5666
N2	Male	8	4.10943	4.55026	14.6862
N2	Male	8	5.24392	5.74893	23.6774
N2	Male	8	5.11272	4.85968	19.5142
N2	Male	8	5.47215	6.00329	25.8011
N2	Male	8	6.25765	5.92518	29.1207
N2	Male	8	4.69858	4.91134	18.1241
N2	Male	8	5.07334	4.99753	19.9131
N2	Male	8	4.84368	5.03622	19.1589
N2	Male	8	5.13923	5.47097	22.0827
N2	Male	8	5.26363	5.01046	20.7134
N2	Male	8	4.98975	4.80074	18.8139
N2	Male	8	4.76422	5.20926	19.492
N2	Male	8	5.14804	5.47215	22.1253
N2	Male	7	4.869	5.23404	20.0155
N2	Male	7	4.77778	6.02373	22.6038
N2	Male	7	5.05161	5.15055	20.4349
N2	Male	7	5.4615	4.38959	18.8289
N2	Male	7	5.15055	5.41868	21.9198
N2	Male	7	4.98975	5.08353	19.9221
N2	Male	7	5.31135	5.39475	22.5043
N2	Male	7	3.25749	3.78145	9.67456
N2	Male	7	5.13923	5.47097	22.0827
N2	Male	7	4.98586	5.09878	19.9663
N2	Male	7	5.3514	5.91534	24.8621
N2	Male	7	5.2105	5.25871	21.5203
N2	Male	7	5.15808	5.24392	21.2439
N2	Male	7	5.46506	5.81162	24.9449
N2	Male	7	4.75198	5.49104	20.4936
N2	Male	6	5.15055	5.0375	20.3779
N2	Male	6	4.93892	4.92449	19.1022
N2	Male	6	5.46624	5.55547	23.8506
N2	Male	6	5.35744	4.82628	20.3077
N2	Male	6	5.42346	4.73151	20.1542
N2	Male	6	4.46993	5.21919	18.3228
N2	Male	6	5.706	5.55664	24.902
N2	Male	6	5.30282	5.67986	23.6556
N2	Male	6	4.61942	5.36951	19.481
N2	Male	6	4.23352	5.69238	18.9272
N2	Male	6	4.92843	4.67649	18.1017
N2	Male	6	5.68556	5.13923	22.9488
N2	Male	6	5.24392	4.44234	18.2961
N2	Male	6	5.1881	5.91644	24.1079
N2	Male	6	4.73151	4.88624	18.1579
N2	Male	5	5.72072	5.30282	23.8258
N2	Male	5	4.90342	5.48986	21.1422
N2	Male	5	4.98586	5.8105	22.7533
N2	Male	5	5.46269	6.28138	26.9496
N2	Male	5	5.18061	5.30282	21.5763
N2	Male	5	4.76422	6.02051	22.5276
N2	Male	5	5.09878	4.85036	19.4236
N2	Male	5	4.61942	5.33081	19.3406
N2	Male	5	5.77924	5.27836	23.9585
N2	Male	5	4.82896	5.55081	21.0523
N2	Male	5	5.70147	5.15055	23.0638
N2	Male	5	5.79378	7.10228	32.3183
N2	Male	5	4.58568	5.80047	20.8909
N2	Male	5	5.48986	5.97195	25.7494
N2	Male	5	5.97195	5.97195	28.0106
N2	Male	4	4.44961	5.18061	18.1048
N2	Male	4	4.99753	5.43776	21.3435
N2	Male	4	4.98975	5.55081	21.7533
N2	Male	4	5.17436	5.7568	23.3953
N2	Male	4	5.98494	6.26901	29.4679
N2	Male	4	5.54731	5.44727	23.7329
N2	Male	4	4.44234	5.18061	18.0752
N2	Male	4	5.83162	5.46269	25.0199
N2	Male	4	4.74107	5.41868	20.1772
N2	Male	4	5.82718	5.7162	26.1611
N2	Male	4	4.91265	4.99753	19.2824
N2	Male	4	5.42704	5.23775	22.3253
N2	Male	4	4.44234	5.36951	18.7342
N2	Male	4	5.66732	5.64788	25.1393
N2	Male	4	5.04905	4.78319	18.9678
N2	Male	3	5.17436	5.07971	20.6436
N2	Male	3	4.60258	5.7162	20.6632
N2	Male	3	4.99753	6.07614	23.8491
N2	Male	3	4.93499	5.07971	19.6886
N2	Male	3	3.66325	3.78145	10.8796
N2	Male	3	4.18278	5.38995	17.7068
N2	Male	3	5.33081	5.24392	21.9553
N2	Male	3	4.74107	4.95593	18.454
N2	Male	3	5.49104	5.65703	24.3968
N2	Male	3	3.89107	3.78145	11.5563
N2	Male	3	4.23199	4.27459	14.2079
N2	Male	3	4.10943	4.74653	15.3196
N2	Male	3	5.28211	4.90186	20.3356
N2	Male	3	5.46631	5.45832	23.4338
N2	Male	3	5.40269	5.5081	23.3723
N2	Male	2	5.29793	5.29182	22.0192
N2	Male	2	5.2105	4.98586	20.4037
N2	Male	2	5.50399	4.91134	21.2308
N2	Male	2	5.55547	5.24392	22.8806
N2	Male	2	4.91265	6.03017	23.2668
N2	Male	2	5.48986	5.36951	23.1518
N2	Male	2	5.59609	5.59609	24.5957
N2	Male	2	5.46979	5.34172	22.9478
N2	Male	2	5.38995	5.57523	23.6014
N2	Male	2	5.70147	5.29305	23.7018
N2	Male	2	5.0375	4.58568	18.143
N2	Male	2	5.58451	5.54731	24.3309
N2	Male	2	5.36589	5.42346	22.8564
N2	Male	2	5.33202	5.7433	24.0516
N2	Male	2	5.22948	5.68307	23.3416
N2	Male	1	5.4615	4.83967	20.7596
N2	Male	1	5.57523	5.57523	24.4127
N2	Male	1	4.03154	4.58568	14.5199
N2	Male	1	4.10155	4.34663	14.002
N2	Male	1	5.15808	5.81162	23.5437
N2	Male	1	5.50751	4.92186	21.29
N2	Male	1	5.30282	4.76286	19.8365
N2	Male	1	4.17194	4.69031	15.3684
N2	Male	1	4.35407	4.0074	13.704
N2	Male	1	5.07844	5.32838	21.2528
N2	Male	1	4.66402	4.90342	17.9618
N2	Male	1	4.75198	5.65131	21.0918
N2	Male	1	5.09878	5.1881	20.7761
N2	Male	1	6.15759	5.57872	26.9795
N2	Male	1	5.14426	5.70147	23.0356
nurf-1	Male	2	5.15808	4.70958	19.0792
nurf-1	Male	2	5.33081	5.06824	21.2197
nurf-1	Male	2	5.07971	5.24022	20.9064
nurf-1	Male	2	4.30024	4.34663	14.6803
nurf-1	Male	2	4.89286	4.43651	17.0488
nurf-1	Male	2	2.82566	4.0074	8.89348
nurf-1	Male	2	5.05289	4.32425	17.1609
nurf-1	Male	2	3.30678	3.86103	10.0276
nurf-1	Male	2	3.82398	4.12358	12.3845
nurf-1	Male	2	5.49104	5.22909	22.5513
nurf-1	Male	2	3.62061	3.78145	10.753
nurf-1	Male	2	5.50281	3.47284	15.0093
nurf-1	Male	2	4.95593	5.74217	22.3507
nurf-1	Male	2	5.20926	5.05161	20.6679
nurf-1	Male	2	4.89682	5.20926	20.0346
nurf-1	Male	3	4.22281	3.78145	12.5415
nurf-1	Male	3	4.19514	4.1408	13.6433
nurf-1	Male	3	4.30024	4.61942	15.6016
nurf-1	Male	3	3.92749	5.60186	17.2797
nurf-1	Male	3	4.02029	3.6914	11.6557
nurf-1	Male	3	4.22281	3.72629	12.3586
nurf-1	Male	3	5.07334	4.58568	18.272
nurf-1	Male	3	3.28124	3.73149	9.61637
nurf-1	Male	3	4.50022	4.54172	16.0526
nurf-1	Male	3	4.16573	4.70958	15.4086
nurf-1	Male	3	4.67649	4.21514	15.4818
nurf-1	Male	3	4.42483	3.54293	12.3126
nurf-1	Male	3	4.0219	3.92913	12.4113
nurf-1	Male	3	4.02512	3.94885	12.4836
nurf-1	Male	3	3.96193	4.12201	12.8264
nurf-1	Male	4	5.20926	4.91265	20.0993
nurf-1	Male	4	4.68064	5.1881	19.0723
nurf-1	Male	4	4.98586	4.83967	18.9516
nurf-1	Male	4	4.76286	4.57579	17.1168
nurf-1	Male	4	5.00658	5.34777	21.0283
nurf-1	Male	4	4.68064	5.24392	19.2775
nurf-1	Male	4	4.41751	4.03956	14.0153
nurf-1	Male	4	4.55026	4.28215	15.3034
nurf-1	Male	4	4.60679	5.00658	18.1146
nurf-1	Male	4	5.25994	5.29305	21.8663
nurf-1	Male	4	3.89107	4.48293	13.7
nurf-1	Male	4	4.92318	5.47215	21.1589
nurf-1	Male	4	3.57022	3.5973	10.087
nurf-1	Male	4	4.81151	5.01691	18.9587
nurf-1	Male	4	4.58003	4.75334	17.0985
nurf-1	Male	5	4.59132	5.31135	19.1528
nurf-1	Male	5	4.18587	3.78828	12.4543
nurf-1	Male	5	3.5973	4.7137	13.3177
nurf-1	Male	5	4.07306	3.70365	11.8479
nurf-1	Male	5	3.86438	4.34663	13.1924
nurf-1	Male	5	4.43067	3.57203	12.4301
nurf-1	Male	5	4.20899	3.28124	10.8469
nurf-1	Male	5	5.4615	5.2328	22.4459
nurf-1	Male	5	5.07334	5.01046	19.9646
nurf-1	Male	5	4.82762	4.03956	15.3164
nurf-1	Male	5	3.78145	3.72629	11.0669
nurf-1	Male	5	4.00094	4.17194	13.1096
nurf-1	Male	5	4.2761	4.2761	14.361
nurf-1	Male	5	6.85	6.37443	34.2943
nurf-1	Male	5	5.04905	5.04905	20.0221
nurf-1	Male	6	4.55026	4.44234	15.8759
nurf-1	Male	6	4.39106	4.48726	15.4754
nurf-1	Male	6	4.19514	4.27004	14.0692
nurf-1	Male	6	4.26398	4.66818	15.6334
nurf-1	Male	6	4.83298	4.59132	17.4278
nurf-1	Male	6	4.07782	4.25942	13.6417
nurf-1	Male	6	3.84928	4.03956	12.2125
nurf-1	Male	6	3.25749	4.06511	10.4003
nurf-1	Male	6	4.70958	4.42483	16.367
nurf-1	Male	6	4.92186	4.77913	18.4743
nurf-1	Male	6	4.26398	4.59132	15.3759
nurf-1	Male	6	4.90078	4.0219	15.4806
nurf-1	Male	6	5.00658	4.06988	16.0034
nurf-1	Male	6	5.14804	5.23404	21.1626
nurf-1	Male	6	3.9981	4.37039	13.7235
nurf-1	Male	7	4.89286	5.11019	19.6377
nurf-1	Male	7	5.00141	5.15432	20.2467
nurf-1	Male	7	5.84713	4.76422	21.8788
nurf-1	Male	7	4.10155	4.57296	14.7311
nurf-1	Male	7	5.30891	4.53031	18.8896
nurf-1	Male	7	5.05289	4.89682	19.4332
nurf-1	Male	7	4.66957	4.7994	17.6016
nurf-1	Male	7	4.73151	4.85036	18.0245
nurf-1	Male	7	4.93892	4.51171	17.501
nurf-1	Male	7	5.14049	5.0375	20.3381
nurf-1	Male	7	5.36589	4.7027	19.8189
nurf-1	Male	7	4.75198	4.85036	18.1025
nurf-1	Male	7	5.09878	5.07334	20.3166
nurf-1	Male	7	4.27004	5.7162	19.1703
nurf-1	Male	7	6.62529	4.79535	24.9525
nurf-1	Male	8	5.63296	4.99753	22.1097
nurf-1	Male	8	4.96636	4.82896	18.8357
nurf-1	Male	8	5.29182	5.64788	23.4736
nurf-1	Male	8	5.40793	5.15934	21.9136
nurf-1	Male	8	5.11019	5.21919	20.9474
nurf-1	Male	8	4.85968	5.61225	21.4208
nurf-1	Male	8	5.13923	5.45202	22.0062
nurf-1	Male	8	5.07334	5.14426	20.4978
nurf-1	Male	8	5.56478	5.59724	24.4631
nurf-1	Male	8	4.7027	4.76422	17.5966
nurf-1	Male	8	4.73561	5.75231	21.3948
nurf-1	Male	8	6.21927	5.7568	28.1197
nurf-1	Male	8	4.97547	4.90342	19.1612
nurf-1	Male	8	4.7137	4.78454	17.713
nurf-1	Male	8	5.68897	5.75568	25.717
nurf-1	Male	9	4.90078	4.61942	17.7804
nurf-1	Male	9	4.77507	5.29793	19.869
nurf-1	Male	9	4.93892	4.546	17.634
nurf-1	Male	9	4.74107	5.03879	18.7626
nurf-1	Male	9	4.74653	4.66818	17.4026
nurf-1	Male	9	4.68478	4.66957	17.1813
nurf-1	Male	9	4.46123	3.84928	13.4873
nurf-1	Male	9	4.19668	4.17659	13.7663
nurf-1	Male	9	5.36589	4.64317	19.568
nurf-1	Male	9	4.21053	4.76286	15.7505
nurf-1	Male	9	5.27836	4.91265	20.3659
nurf-1	Male	9	4.75198	4.81151	17.9575
nurf-1	Male	9	5.1881	5.17436	21.0841
nurf-1	Male	9	4.33172	5.01691	17.0682
nurf-1	Male	9	4.64734	5.29182	19.3152
nurf-1	Male	10	4.63061	4.60679	16.7543
nurf-1	Male	10	4.22127	4.97547	16.4956
nurf-1	Male	10	3.45977	5.07844	13.7996
nurf-1	Male	10	3.51175	4.78454	13.1963
nurf-1	Male	10	3.87441	6.03339	18.3593
nurf-1	Male	10	3.62775	4.91265	13.9973
nurf-1	Male	10	3.5973	4.60679	13.0156
nurf-1	Male	10	4.07782	5.04905	16.1707
nurf-1	Male	10	4.36001	5.0375	17.2502
nurf-1	Male	10	4.45978	3.62061	12.6819
nurf-1	Male	10	3.56115	4.12201	11.5289
nurf-1	Male	10	3.39369	3.97986	10.6079
nurf-1	Male	10	5.15934	2.74905	11.1395
nurf-1	Male	10	4.3763	3.78828	13.0209
nurf-1	Male	10	3.23557	5.72072	14.5376
nurf-1	Male	11	4.39401	4.48726	15.4858
nurf-1	Male	11	5.51338	4.50022	19.4869
nurf-1	Male	11	5.39595	4.35407	18.4524
nurf-1	Male	11	4.3763	4.35407	14.9656
nurf-1	Male	11	4.05076	3.91429	12.4531
nurf-1	Male	11	4.50022	3.84928	13.6051
nurf-1	Male	11	4.03475	3.70015	11.7254
nurf-1	Male	11	4.85968	4.93892	18.8508
nurf-1	Male	11	4.15173	3.99608	13.0303
nurf-1	Male	11	5.22909	3.71411	15.2536
nurf-1	Male	11	4.12358	5.19807	16.8347
nurf-1	Male	11	4.28215	5.07334	17.0626
nurf-1	Male	11	3.87441	4.91265	14.949
nurf-1	Male	11	4.42629	4.73151	16.4486
nurf-1	Male	11	4.77913	5.15808	19.361
nurf-1	Male	12	4.47083	4.46594	15.6816
nurf-1	Male	12	4.496	3.87796	13.6936
nurf-1	Male	12	4.94694	5.18264	20.1362
nurf-1	Male	12	4.64882	4.11828	15.0366
nurf-1	Male	12	4.88699	4.05595	15.5677
nurf-1	Male	12	4.46676	4.5419	15.9338
nurf-1	Male	12	3.16711	4.3176	10.7398
nurf-1	Male	12	4.22472	4.3176	14.3262
nurf-1	Male	12	3.72477	4.18404	12.2401
nurf-1	Male	12	4.99308	4.73031	18.5502
nurf-1	Male	12	3.88275	4.73151	14.4288
nurf-1	Male	12	3.4429	3.53196	9.55057
nurf-1	Male	12	4.16573	4.23199	13.846
nurf-1	Male	12	4.23199	4.23199	14.0663
nurf-1	Male	12	4.32873	4.3362	14.7421
N2	Hermaphrodite	1	3.224	3.43347	8.69397
N2	Hermaphrodite	1	4.16743	4.19873	13.7428
N2	Hermaphrodite	1	4.44082	4.52836	15.7941
N2	Hermaphrodite	1	3.86363	3.89729	11.8263
N2	Hermaphrodite	1	4.10425	4.1016	13.2214
N2	Hermaphrodite	1	4.1016	4.01568	12.9361
N2	Hermaphrodite	1	3.9001	3.89729	11.9379
N2	Hermaphrodite	1	3.44307	3.39849	9.19011
N2	Hermaphrodite	1	3.47451	3.57046	9.74334
N2	Hermaphrodite	1	3.44307	3.3663	9.10309
N2	Hermaphrodite	1	3.60382	3.89729	11.031
N2	Hermaphrodite	1	4.52836	4.38901	15.6098
N2	Hermaphrodite	1	3.69933	4.01568	11.6674
N2	Hermaphrodite	1	4.46282	4.42857	15.5225
N2	Hermaphrodite	1	4.75363	4.42857	16.534
N2	Hermaphrodite	1	4.13333	4.13599	13.4267
N2	Hermaphrodite	1	4.25025	4.06159	13.5581
N2	Hermaphrodite	1	4.25792	4.01568	13.4291
N2	Hermaphrodite	1	4.3617	4.48969	15.3802
N2	Hermaphrodite	1	3.97479	3.77226	11.7762
N2	Hermaphrodite	1	3.96106	3.96106	12.3229
N2	Hermaphrodite	1	4.11222	4.15695	13.4258
N2	Hermaphrodite	1	4.25025	4.20124	14.0243
N2	Hermaphrodite	1	3.87485	4.01568	12.2209
N2	Hermaphrodite	1	3.69933	3.6459	10.593
N2	Hermaphrodite	2	4.22973	4.083	13.5638
N2	Hermaphrodite	2	3.83249	3.73447	11.2408
N2	Hermaphrodite	2	4.35919	4.22973	14.4813
N2	Hermaphrodite	2	4.44082	4.52836	15.7941
N2	Hermaphrodite	2	4.29867	4.11754	13.9015
N2	Hermaphrodite	2	4.02926	4.22973	13.3853
N2	Hermaphrodite	2	4.15961	4.1016	13.3997
N2	Hermaphrodite	2	3.76355	3.7169	10.9867
N2	Hermaphrodite	2	4.66816	4.4823	16.4338
N2	Hermaphrodite	3	5.14984	5.11795	20.7004
N2	Hermaphrodite	3	4.48969	4.15695	14.6582
N2	Hermaphrodite	3	4.52836	4.8084	17.1014
N2	Hermaphrodite	3	4.71687	4.4237	16.3881
N2	Hermaphrodite	3	5.01905	4.76057	18.7659
N2	Hermaphrodite	3	4.83556	4.66816	17.7289
N2	Hermaphrodite	3	4.34162	4.48969	15.3094
N2	Hermaphrodite	3	4.70993	4.38163	16.2084
N2	Hermaphrodite	3	4.49943	4.38399	15.4923
N2	Hermaphrodite	3	4.22973	3.97479	13.2043
N2	Hermaphrodite	3	4.81976	4.63302	17.538
N2	Hermaphrodite	4	3.6459	3.69933	10.593
N2	Hermaphrodite	4	4.3617	4.20124	14.3921
N2	Hermaphrodite	4	3.57046	3.55511	9.96936
N2	Hermaphrodite	4	4.46769	4.29114	15.0572
N2	Hermaphrodite	4	4.29867	4.02926	13.6035
N2	Hermaphrodite	4	4.62121	4.76972	17.3117
N2	Hermaphrodite	4	4.38163	4.15961	14.3146
N2	Hermaphrodite	4	4.57855	4.58328	16.4814
N2	Hermaphrodite	4	4.15695	3.70229	12.0875
N2	Hermaphrodite	4	3.97479	4.01568	12.5361
N2	Hermaphrodite	4	5.2421	4.73296	19.4862
N2	Hermaphrodite	4	3.9001	3.82953	11.7303
N2	Hermaphrodite	4	4.083	3.98852	12.7903
N2	Hermaphrodite	4	4.15695	4.15695	13.5719
N2	Hermaphrodite	4	5.38765	5.75714	24.3611
N2	Hermaphrodite	5	4.44082	4.19873	14.6444
N2	Hermaphrodite	5	3.73447	3.69048	10.8243
N2	Hermaphrodite	5	3.70229	3.98852	11.5977
N2	Hermaphrodite	5	3.7169	3.55511	10.3782
N2	Hermaphrodite	5	2.98899	3.92239	9.20799
N2	Hermaphrodite	5	3.30091	3.54906	9.20103
N2	Hermaphrodite	5	4.19873	4.13599	13.6391
N2	Hermaphrodite	5	3.3694	3.6459	9.64822
N2	Hermaphrodite	5	4.06159	4.083	13.0246
N2	Hermaphrodite	5	3.93892	4.37159	13.524
N2	Hermaphrodite	5	3.57046	3.8381	10.7629
N2	Hermaphrodite	5	4.01022	4.43846	13.9795
N2	Hermaphrodite	5	3.88327	4.13599	12.6144
N2	Hermaphrodite	6	4.02926	3.93065	12.4388
N2	Hermaphrodite	6	3.90836	3.97479	12.2011
N2	Hermaphrodite	6	3.83249	3.96106	11.9229
N2	Hermaphrodite	6	3.98571	4.01022	12.5535
N2	Hermaphrodite	6	4.02926	3.69343	11.6881
N2	Hermaphrodite	6	4.32155	4.54755	15.435
N2	Hermaphrodite	6	4.26058	3.79529	12.7
N2	Hermaphrodite	6	3.99664	3.26105	10.2363
N2	Hermaphrodite	6	4.11222	3.87485	12.5147
N2	Hermaphrodite	6	4.37159	4.29867	14.7592
N2	Hermaphrodite	6	4.11222	4.19873	13.5608
N2	Hermaphrodite	6	4.083	3.86363	12.3898
N2	Hermaphrodite	6	4.05598	3.88327	12.3704
N2	Hermaphrodite	7	3.76355	3.86363	11.4204
N2	Hermaphrodite	7	4.34413	4.44082	15.1515
N2	Hermaphrodite	7	4.90715	4.66816	17.9914
N2	Hermaphrodite	7	4.58328	4.48969	16.1615
N2	Hermaphrodite	7	4.76972	4.16743	15.6117
N2	Hermaphrodite	7	3.9001	3.69933	11.3315
N2	Hermaphrodite	7	4.02926	4.16743	13.1882
N2	Hermaphrodite	7	4.58328	4.83556	17.4065
N2	Hermaphrodite	7	4.52836	4.72617	16.8089
N2	Hermaphrodite	7	4.54755	4.22722	15.0981
N2	Hermaphrodite	8	4.01022	4.45071	14.0181
N2	Hermaphrodite	8	4.48969	3.98571	14.0544
N2	Hermaphrodite	8	4.40392	4.43846	15.3519
N2	Hermaphrodite	8	4.72617	4.76514	17.6879
N2	Hermaphrodite	8	4.03192	4.20124	13.3039
N2	Hermaphrodite	8	4.34413	4.19873	14.3255
N2	Hermaphrodite	8	4.09362	3.82953	12.3124
N2	Hermaphrodite	8	3.97479	3.44617	10.7582
N2	Hermaphrodite	8	3.54906	3.78377	10.547
N2	Hermaphrodite	8	4.14381	4.30383	14.007
N2	Hermaphrodite	9	4.22722	3.76355	12.4952
N2	Hermaphrodite	9	4.09362	3.76355	12.1003
N2	Hermaphrodite	9	4.03192	3.6459	11.5453
N2	Hermaphrodite	9	3.34682	3.3663	8.84862
N2	Hermaphrodite	9	3.43347	3.56736	9.6199
N2	Hermaphrodite	9	3.6459	3.70229	10.6014
N2	Hermaphrodite	9	3.93892	4.01022	12.4061
N2	Hermaphrodite	9	3.73742	4.01022	11.7714
N2	Hermaphrodite	9	3.90836	3.54906	10.8943
N2	Hermaphrodite	9	3.88327	3.98571	12.1561
N2	Hermaphrodite	9	3.27773	3.8381	9.88051
N2	Hermaphrodite	9	3.83249	4.19873	12.6383
N2	Hermaphrodite	9	3.7169	4.13333	12.0662
N2	Hermaphrodite	9	4.26058	3.97479	13.3007
N2	Hermaphrodite	9	4.22722	4.01022	13.3141
N2	Hermaphrodite	9	4.22722	4.05347	13.4577
N2	Hermaphrodite	9	3.84946	3.8381	11.6039
nurf-1	Hermaphrodite	1	2.96171	3.02365	7.03338
nurf-1	Hermaphrodite	1	3.12893	3.48027	8.55262
nurf-1	Hermaphrodite	1	3.05829	3.02962	7.27708
nurf-1	Hermaphrodite	1	3.70414	3.6806	10.7077
nurf-1	Hermaphrodite	1	2.49178	2.76855	5.41817
nurf-1	Hermaphrodite	1	3.06307	3.17517	7.63861
nurf-1	Hermaphrodite	1	3.26561	3.64476	9.3481
nurf-1	Hermaphrodite	1	2.52079	2.90079	5.74306
nurf-1	Hermaphrodite	1	2.67897	3.09037	6.50231
nurf-1	Hermaphrodite	1	2.96171	3.00556	6.99131
nurf-1	Hermaphrodite	1	2.90079	3.31305	7.54804
nurf-1	Hermaphrodite	1	2.76326	2.98731	6.48323
nurf-1	Hermaphrodite	1	3.17517	3.44341	8.5871
nurf-1	Hermaphrodite	1	3.76642	3.79424	11.2239
nurf-1	Hermaphrodite	2	2.83612	2.83612	6.31742
nurf-1	Hermaphrodite	2	2.83612	2.94567	6.56144
nurf-1	Hermaphrodite	2	4.1094	3.93672	12.7058
nurf-1	Hermaphrodite	2	4.22287	4.78921	15.8841
nurf-1	Hermaphrodite	2	4.27952	3.999	13.4412
nurf-1	Hermaphrodite	2	4.26929	4.57302	15.3337
nurf-1	Hermaphrodite	2	3.66967	4.0891	11.7854
nurf-1	Hermaphrodite	2	4.61823	3.74237	13.5741
nurf-1	Hermaphrodite	2	3.38062	3.71694	9.86897
nurf-1	Hermaphrodite	2	5.33081	4.70713	19.7079
nurf-1	Hermaphrodite	2	3.48556	3.55177	9.72314
nurf-1	Hermaphrodite	2	5.30896	4.46603	18.6218
nurf-1	Hermaphrodite	2	4.1094	3.39768	10.9661
nurf-1	Hermaphrodite	2	3.78878	3.25776	9.69412
nurf-1	Hermaphrodite	2	3.77717	3.29325	9.76972
nurf-1	Hermaphrodite	2	3.74237	3.94406	11.5926
nurf-1	Hermaphrodite	2	3.51047	3.36543	9.2789
nurf-1	Hermaphrodite	2	3.6806	3.99815	11.5576
nurf-1	Hermaphrodite	2	4.42422	4.53462	15.7568
nurf-1	Hermaphrodite	2	3.48232	3.26663	8.93427
nurf-1	Hermaphrodite	3	4.16042	3.90703	12.7666
nurf-1	Hermaphrodite	3	3.58436	3.50109	9.85608
nurf-1	Hermaphrodite	3	4.16656	4.14199	13.5543
nurf-1	Hermaphrodite	3	4.13056	3.20248	10.3893
nurf-1	Hermaphrodite	3	3.93023	3.96982	12.254
nurf-1	Hermaphrodite	3	3.48129	3.65176	9.98464
nurf-1	Hermaphrodite	3	3.89116	3.65176	11.1602
nurf-1	Hermaphrodite	3	4.3703	3.98347	13.673
nurf-1	Hermaphrodite	3	4.87504	3.83451	14.6817
nurf-1	Hermaphrodite	3	4.40358	3.20248	11.076
nurf-1	Hermaphrodite	3	3.82035	3.43932	10.3196
nurf-1	Hermaphrodite	3	4.04695	4.18397	13.2986
nurf-1	Hermaphrodite	3	4.18397	4.5435	14.9303
nurf-1	Hermaphrodite	3	3.97989	3.45502	10.7997
nurf-1	Hermaphrodite	3	4.47081	3.47293	12.1947
nurf-1	Hermaphrodite	3	3.80499	4.05326	12.1129
nurf-1	Hermaphrodite	3	3.5074	3.44341	9.48559
nurf-1	Hermaphrodite	3	2.82571	3.36219	7.46175
nurf-1	Hermaphrodite	3	4.84808	4.12715	15.7148
nurf-1	Hermaphrodite	3	4.27611	3.55586	11.9422
nurf-1	Hermaphrodite	4	4.23345	4.08415	13.5796
nurf-1	Hermaphrodite	4	4.10155	5.04909	16.2649
nurf-1	Hermaphrodite	4	4.53036	4.41757	15.7183
nurf-1	Hermaphrodite	4	4.37781	3.10487	10.6756
nurf-1	Hermaphrodite	4	3.7968	3.42208	10.2046
nurf-1	Hermaphrodite	4	4.10155	4.33174	13.954
nurf-1	Hermaphrodite	4	4.35563	3.4673	11.8613
nurf-1	Hermaphrodite	4	3.86181	4.13022	12.5272
nurf-1	Hermaphrodite	4	4.21246	4.1193	13.6285
nurf-1	Hermaphrodite	4	4.29164	4.34556	14.6473
nurf-1	Hermaphrodite	4	3.32243	3.05778	7.97906
nurf-1	Hermaphrodite	4	3.60313	3.40178	9.62665
nurf-1	Hermaphrodite	4	2.62198	3.26988	6.73364
nurf-1	Hermaphrodite	4	3.76131	3.72633	11.008
nurf-1	Hermaphrodite	4	4.47063	4.3186	15.1636
nurf-1	Hermaphrodite	4	4.07067	4.25717	13.6106
nurf-1	Hermaphrodite	4	3.19463	3.58436	8.99335
nurf-1	Hermaphrodite	4	3.76267	3.62173	10.7029
nurf-1	Hermaphrodite	4	3.61968	3.74817	10.6556
nurf-1	Hermaphrodite	4	4.26673	4.05326	13.5828
nurf-1	Hermaphrodite	5	3.91437	4.04695	12.4417
nurf-1	Hermaphrodite	5	4.00992	3.98347	12.5455
nurf-1	Hermaphrodite	5	3.80499	4.01077	11.9859
nurf-1	Hermaphrodite	5	3.92836	4.22134	13.0242
nurf-1	Hermaphrodite	5	3.87324	3.51457	10.6914
nurf-1	Hermaphrodite	5	3.93296	3.91437	12.0913
nurf-1	Hermaphrodite	5	3.70414	3.54869	10.324
nurf-1	Hermaphrodite	5	3.80448	4.06521	12.147
nurf-1	Hermaphrodite	5	4.32321	4.16179	14.1311
nurf-1	Hermaphrodite	5	4.33515	4.37525	14.8969
nurf-1	Hermaphrodite	5	4.31143	4.264	14.4387
nurf-1	Hermaphrodite	5	2.96649	3.2639	7.60449
nurf-1	Hermaphrodite	6	4.40443	4.45374	15.4065
nurf-1	Hermaphrodite	6	3.85447	4.63547	14.0329
nurf-1	Hermaphrodite	6	3.42225	3.94764	10.6106
nurf-1	Hermaphrodite	6	3.55074	3.33182	9.29159
nurf-1	Hermaphrodite	6	4.20137	3.97716	13.1236
nurf-1	Hermaphrodite	6	4.16042	3.70124	12.0941
nurf-1	Hermaphrodite	6	4.15104	4.31945	14.0823
nurf-1	Hermaphrodite	6	4.59059	4.79979	17.3054
nurf-1	Hermaphrodite	6	3.99371	4.07186	12.772
nurf-1	Hermaphrodite	6	3.06614	3.38693	8.15621
nurf-1	Hermaphrodite	6	3.16886	3.51354	8.74457
nurf-1	Hermaphrodite	7	3.53521	3.96982	11.0224
nurf-1	Hermaphrodite	7	2.82708	3.25998	7.2384
nurf-1	Hermaphrodite	7	4.19711	4.11742	13.5727
nurf-1	Hermaphrodite	7	3.85533	4.20137	12.7216
nurf-1	Hermaphrodite	7	3.21169	3.28216	8.27911
nurf-1	Hermaphrodite	7	3.61354	3.75789	10.6651
nurf-1	Hermaphrodite	7	3.45502	3.6707	9.96067
nurf-1	Hermaphrodite	7	4.14438	3.41884	11.1283
nurf-1	Hermaphrodite	7	4.05821	3.27022	10.4232
nurf-1	Hermaphrodite	7	2.91581	3.09532	7.0885
nurf-1	Hermaphrodite	7	3.81352	3.79304	11.3607
nurf-1	Hermaphrodite	7	3.68452	3.56405	10.3137
nurf-1	Hermaphrodite	7	4.01077	3.6277	11.4274
nurf-1	Hermaphrodite	7	3.60057	3.44341	9.73755
nurf-1	Hermaphrodite	7	4.21127	4.34556	14.373
nurf-1	Hermaphrodite	7	4.46193	4.12356	14.4506
nurf-1	Hermaphrodite	7	4.31143	4.19506	14.2053
nurf-1	Hermaphrodite	8	3.45348	3.0216	8.19567
nurf-1	Hermaphrodite	8	3.0646	2.95796	7.1196
nurf-1	Hermaphrodite	8	3.11869	2.73852	6.70778
nurf-1	Hermaphrodite	8	4.29062	4.14199	13.9579
nurf-1	Hermaphrodite	8	3.94098	3.913	12.1117
nurf-1	Hermaphrodite	8	4.49657	4.22782	14.931
nurf-1	Hermaphrodite	8	3.91795	3.77496	11.6161
nurf-1	Hermaphrodite	8	3.98347	4.03483	12.6234
nurf-1	Hermaphrodite	8	4.38856	3.94764	13.6066
nurf-1	Hermaphrodite	8	3.64203	3.99815	11.4365
nurf-1	Hermaphrodite	8	4.16656	4.08483	13.3672
nurf-1	Hermaphrodite	8	3.95225	3.98467	12.3688
nurf-1	Hermaphrodite	8	4.06521	4.0821	13.0333
nurf-1	Hermaphrodite	8	3.92836	3.85823	11.9039
nurf-1	Hermaphrodite	8	4.52899	4.15172	14.7679
nurf-1	Hermaphrodite	8	3.45502	3.54887	9.63007
nurf-1	Hermaphrodite	9	4.1024	3.34479	10.777
nurf-1	Hermaphrodite	9	3.63487	4.12356	11.772
nurf-1	Hermaphrodite	9	3.70534	4.53309	13.192
nurf-1	Hermaphrodite	9	3.87802	4.33447	13.2019
nurf-1	Hermaphrodite	9	4.25052	4.40443	14.7035
nurf-1	Hermaphrodite	9	4.39197	4.61431	15.9168
nurf-1	Hermaphrodite	9	3.59954	4.0461	11.4386
nurf-1	Hermaphrodite	9	4.80508	4.76942	17.9993
nurf-1	Hermaphrodite	9	4.58564	4.16571	15.003
nurf-1	Hermaphrodite	9	3.25998	3.36219	8.60849
nurf-1	Hermaphrodite	9	2.82571	3.33728	7.40646
nurf-1	Hermaphrodite	9	3.34479	3.39768	8.92567
nurf-1	Hermaphrodite	9	3.93296	4.20137	12.9778
nurf-1	Hermaphrodite	9	3.24326	3.83451	9.76745
nurf-1	Hermaphrodite	9	3.66967	4.1094	11.8439
nurf-1	Hermaphrodite	9	3.98177	4.06401	12.7093
nurf-1	Hermaphrodite	9	3.80977	4.21519	12.6126
nurf-1	Hermaphrodite	9	4.31758	4.41433	14.969
nurf-1	Hermaphrodite	9	3.1303	3.64732	8.96705
nurf-1	Hermaphrodite	9	4.37883	4.34402	14.9397
nurf-1	Hermaphrodite	9	3.11869	3.13763	7.68538
nurf-1	Hermaphrodite	9	4.22407	4.22304	14.0103
nurf-1	Hermaphrodite	9	3.75789	3.80499	11.2302
nurf-1	Hermaphrodite	9	3.83263	3.70124	11.1413
nurf-1	Hermaphrodite	10	4.48872	4.25035	14.9843
nurf-1	Hermaphrodite	10	3.16067	2.71002	6.72732
nurf-1	Hermaphrodite	10	2.86172	3.19804	7.18788
nurf-1	Hermaphrodite	10	2.56089	3.24872	6.5342
nurf-1	Hermaphrodite	10	3.7782	4.12356	12.2362
nurf-1	Hermaphrodite	10	3.51354	3.53214	9.74706
nurf-1	Hermaphrodite	10	3.01648	3.47293	8.22787
nurf-1	Hermaphrodite	10	3.6806	3.74032	10.8123
nurf-1	Hermaphrodite	10	4.00634	3.52702	11.098
nurf-1	Hermaphrodite	10	3.58743	4.05412	11.4227
nurf-1	Hermaphrodite	10	3.56405	3.20248	8.96437
nurf-1	Hermaphrodite	10	3.78144	3.8828	11.5317
nurf-1	Hermaphrodite	10	3.64732	4.10155	11.7493
nurf-1	Hermaphrodite	10	4.43651	4.43975	15.47
nurf-1	Hermaphrodite	10	3.81676	4.08329	12.2404
nurf-1	Hermaphrodite	10	3.81796	3.74612	11.2332
nurf-1	Hermaphrodite	10	3.83946	3.93587	11.8686
nurf-1	Hermaphrodite	10	4.55066	3.67258	13.1261
nurf-1	Hermaphrodite	10	3.3197	3.02962	7.8991
nurf-1	Hermaphrodite	10	4.82624	3.86437	14.648
nurf-1	Hermaphrodite	11	3.85447	4.0891	12.3789
nurf-1	Hermaphrodite	11	3.69339	4.35034	12.6194
nurf-1	Hermaphrodite	11	3.39376	3.99439	10.6469
nurf-1	Hermaphrodite	11	4.18397	4.02442	13.2246
nurf-1	Hermaphrodite	11	3.62975	3.52702	10.0548
nurf-1	Hermaphrodite	11	3.40741	3.36543	9.00648
nurf-1	Hermaphrodite	11	3.20538	3.36014	8.45915
nurf-1	Hermaphrodite	12	3.5731	4.24625	11.9163
nurf-1	Hermaphrodite	12	3.39376	3.94388	10.5122
nurf-1	Hermaphrodite	12	3.42976	3.4127	9.19288
nurf-1	Hermaphrodite	12	3.14634	3.50433	8.65964
nurf-1	Hermaphrodite	12	3.42021	3.09037	8.30142
nurf-1	Hermaphrodite	12	3.59255	3.91437	11.0447
nurf-1	Hermaphrodite	12	4.78085	4.1884	15.7269
nurf-1	Hermaphrodite	12	4.3604	3.33182	11.4103
nurf-1	Hermaphrodite	12	4.91156	3.1878	12.297
nurf-1	Hermaphrodite	12	3.74817	3.09156	9.10095
nurf-1	Hermaphrodite	13	3.75226	3.75226	11.058
nurf-1	Hermaphrodite	13	4.264	4.53036	15.1719
nurf-1	Hermaphrodite	13	3.12364	4.11094	10.0854
nurf-1	Hermaphrodite	13	3.53385	3.59187	9.96914
nurf-1	Hermaphrodite	13	3.57019	3.39376	9.51618
nurf-1	Hermaphrodite	13	4.43651	4.42627	15.423
nurf-1	Hermaphrodite	13	2.8095	3.06307	6.7589
nurf-1	Hermaphrodite	13	4.0507	3.82222	12.1601
nurf-1	Hermaphrodite	13	3.12893	3.3197	8.15803
nurf-1	Hermaphrodite	13	3.76267	3.14753	9.30157
nurf-1	Hermaphrodite	13	2.72214	2.97144	6.35282
nurf-1	Hermaphrodite	13	4.12049	4.17185	13.5011
nurf-1	Hermaphrodite	13	3.25606	3.6376	9.30242
nurf-1	Hermaphrodite	13	2.83612	2.97997	6.63784
nurf-1	Hermaphrodite	14	3.59187	3.05829	8.62757
nurf-1	Hermaphrodite	14	4.43651	3.75499	13.084
nurf-1	Hermaphrodite	14	5.61082	3.63777	16.0306
nurf-1	Hermaphrodite	14	4.26417	3.75499	12.5757
nurf-1	Hermaphrodite	14	3.88075	4.15957	12.6781
nurf-1	Hermaphrodite	14	3.48556	3.61575	9.89831
nurf-1	Hermaphrodite	14	3.04532	3.00556	7.18868
nurf-1	Hermaphrodite	14	3.60859	4.16042	11.7914
nurf-1	Hermaphrodite	14	3.66967	3.95788	11.4072
nurf-1	Hermaphrodite	14	3.99627	4.38702	13.7694
nurf-1	Hermaphrodite	14	4.18056	4.36791	14.3416
nurf-1	Hermaphrodite	14	2.84124	4.46432	9.96216
nurf-1	Hermaphrodite	14	3.86283	3.94406	11.9657
nurf-1	Hermaphrodite	14	4.29642	3.80123	12.8269
nurf-1	Hermaphrodite	14	4.29642	4.3546	14.6942
nurf-1	Hermaphrodite	14	3.75397	3.59954	10.6127
nurf-1	Hermaphrodite	15	3.75107	3.72479	10.9735
nurf-1	Hermaphrodite	15	4.39197	4.46432	15.3994
nurf-1	Hermaphrodite	15	4.24284	4.29386	14.3085
nurf-1	Hermaphrodite	15	3.88075	3.59954	10.9712
nurf-1	Hermaphrodite	15	3.82035	4.0891	12.2693
nurf-1	Hermaphrodite	15	3.13934	3.74817	9.2416
nurf-1	Hermaphrodite	15	3.29325	3.33182	8.6178
nurf-1	Hermaphrodite	15	5.10335	4.25052	17.0368
nurf-1	Hermaphrodite	15	4.09524	3.86812	12.4414
nurf-1	Hermaphrodite	15	4.54486	4.01589	14.3348
nurf-1	Hermaphrodite	15	4.30819	4.07306	13.7818
nurf-1	Hermaphrodite	15	3.89184	3.77035	11.5246
nurf-1	Hermaphrodite	15	3.86096	3.6765	11.1486
nurf-1	Hermaphrodite	15	4.2872	4.35034	14.6483
nurf-1	Hermaphrodite	15	3.63282	3.51457	10.0278
nurf-1	Hermaphrodite	15	4.13056	3.49904	11.3514
nurf-1	Hermaphrodite	15	3.93296	3.24326	10.0182
nurf-1	Hermaphrodite	15	3.6277	3.92187	11.1742
nurf-1	Hermaphrodite	15	4.61038	4.46432	16.1653
nurf-1	Hermaphrodite	15	4.26314	3.39222	11.3581
nurf-1	Hermaphrodite	15	3.59238	3.69049	10.4125
nurf-1	Hermaphrodite	15	3.80567	3.9014	11.6611
nurf-1	Hermaphrodite	15	4.21246	3.88143	12.8416
nurf-1	Hermaphrodite	15	3.75789	3.87444	11.4352
nurf-1	Hermaphrodite	15	5.26972	3.60176	14.9071
nurf-1	Hermaphrodite	15	4.29642	4.71959	15.9258
nurf-1	Hermaphrodite	15	4.41927	3.94764	13.7018
nurf-1	Hermaphrodite	15	4.24488	2.9385	9.79675
nurf-1	Hermaphrodite	15	4.01743	4.34539	13.7109
nurf-1	Hermaphrodite	15	3.92187	3.44717	10.6181
nurf-1	Hermaphrodite	15	3.45502	3.76779	10.2241
nurf-1	Hermaphrodite	15	3.45962	3.41475	9.27848
nurf-1	Hermaphrodite	15	3.21613	3.92955	9.92581
nurf-1	Hermaphrodite	15	4.2111	3.98757	13.1884
nurf-1	Hermaphrodite	15	3.92546	4.02084	12.3964
nurf-1	Hermaphrodite	16	3.41372	3.80499	10.2017
nurf-1	Hermaphrodite	16	3.85823	2.50919	7.60345
nurf-1	Hermaphrodite	16	3.45979	3.30929	8.9924
nurf-1	Hermaphrodite	16	3.47003	3.68827	10.0519
nurf-1	Hermaphrodite	16	3.63282	4.05412	11.5672
nurf-1	Hermaphrodite	16	4.22304	3.70414	12.2858
nurf-1	Hermaphrodite	16	3.78878	3.26663	9.72052
nurf-1	Hermaphrodite	16	3.25998	3.58129	9.16946
nurf-1	Hermaphrodite	16	2.8206	2.86172	6.33954
nurf-1	Hermaphrodite	16	3.64476	3.48232	9.96844
nurf-1	Hermaphrodite	16	3.55074	3.75789	10.4798
nurf-1	Hermaphrodite	16	3.15675	3.24872	8.05456
nurf-1	Hermaphrodite	16	3.28216	3.24326	8.36049
nurf-1	Hermaphrodite	16	3.48232	3.77137	10.3147
nurf-1	Hermaphrodite	16	3.59954	3.89116	11.0006
nurf-1	Hermaphrodite	16	3.93023	3.40946	10.5243
nurf-1	Hermaphrodite	16	4.22134	3.93672	13.0519
nurf-1	Hermaphrodite	16	3.71984	2.90574	8.48929
nurf-1	Hermaphrodite	16	3.13712	2.86803	7.06652
nurf-1	Hermaphrodite	16	3.17517	3.24326	8.08796
nurf-1	Hermaphrodite	16	5.27842	4.82624	20.008
nurf-1	Hermaphrodite	16	4.35119	3.50211	11.9682
nurf-1	Hermaphrodite	16	3.58845	3.73946	10.5392
nurf-1	Hermaphrodite	16	4.32525	3.5731	12.138
nurf-1	Hermaphrodite	16	4.12715	3.74817	12.1495
nurf-1	Hermaphrodite	17	4.29266	3.66848	12.3681
nurf-1	Hermaphrodite	17	2.97724	4.12203	9.63861
nurf-1	Hermaphrodite	17	4.26997	4.35563	14.6071
nurf-1	Hermaphrodite	17	4.66396	3.88775	14.2411
nurf-1	Hermaphrodite	17	4.07783	4.03961	12.9378

[truncated: 7 more sheets: 11 complementation test, 12 male sperm NURF mutants, 13 herm sperm isw-1, 14 primary spermatocytes, 15 body size LSJ and mutants, 16 nurf-1 RNAi elegans, 17 nurf-1 RNAI plicata]
